# Supplementary material for: Agonist-mediated switching of ion selectivity in TPC2 differentially promotes lysosomal function
Source: eLife. 2020 Mar 16;9:e54712. doi: 10.7554/eLife.54712 (PMC7108868; doi:10.7554/eLife.54712)
Supplement: Figure 1—figure supplement 1—source data 1. [file elife-54712-fig1-figsupp1-data1.xlsx]

## Sheet: Fig 1 - SI1C-D
Figure 1 - figure supplement 1 C) Effects of Tet, Ralo or Flu on TPC2-A1-N action in cells expressing TPC2 (LLAA)
TPC2-A1-N (µM)	10
									mean	SE	n
DMSO	0.592008	0.752084	0.379706	1.06548	0.690506	0.78918	1.06763		0.762371	0.0934148	7
10µM tetrandrine	0.0356927	0.150153	0.437829	0.308022	0.0443933	0.557909			0.255666	0.0878317	6
									mean	SE	n
DMSO	0.592008	0.752084	0.379706	1.06548	0.477573	0.573392			0.64004	0.0990741	6
10µM raloxifene	0.0250168	0.111138	0.0317867						0.0559806	0.027648	3
									mean	SE	n
DMSO	0.592008	0.752084	0.379706	1.06548	0.477573	0.573392			0.64004	0.0990741	6
10µM fluphenazine	0.275127	0.0787549	0.146019						0.166634	0.0576172	3
Figure 1 - figure supplement 1 D) effects of Tet, Ralo or Flu on ML-SA1 action in cells expressing TRPML1 (ΔNC)
ML-SA1 (µM)	3.16
									mean	SE	n
DMSO	0.47599	1.02498	0.861048						0.787339	0.162709	3
10µM tetrandrine	0.685308	0.795912	0.773928						0.751716	0.0338051	3
									mean	SE	n
DMSO	1.02498	1.10761	0.861048						0.997879	0.072454	3
10µM raloxifene	0.675289	1.0465	0.528631						0.75014	0.15411	3
									mean	SE	n
DMSO	0.47599	1.02498	0.861048						0.787339	0.162709	3
10µM fluphenazine	0.833156	1.17936	1.07095						1.02782	0.10224	3
