# Supplementary material for: Agonist-mediated switching of ion selectivity in TPC2 differentially promotes lysosomal function
Source: eLife. 2020 Mar 16;9:e54712. doi: 10.7554/eLife.54712 (PMC7108868; doi:10.7554/eLife.54712)
Supplement: Figure 1—figure supplement 2—source data 1. [file elife-54712-fig1-figsupp2-data1.xlsx]

## Sheet: Fig 1 - SI2C-D
Figure 1 - figure supplement 2 C) Effect of removing extracellular Ca2+ on TPC2-A1-N action in cells expressing TPC2 (LLAA)
TPC2-A1-N (µM)	10
															mean	SE	n
2mM Ca2+	0.501894	0.11386	0.722565	0.135557	0.647054	0.219115	0.189024	0.386796	0.170157	0.331404	0.260745	0.353215	0.525998		0.350568	0.0547664	13
0 Ca2+	0.0746392	0.0433259	0.0209953												0.0463202	0.0155579	3
Figure 1 - figure supplement 2 D) Effect of removing extracellular Ca2+ on TPC2-A1-P action in cells expressing TPC2 (LLAA)
TPC2-A1-P (µM)	30
															mean	SE	n
2mM Ca2+	0.424897	0.374913	0.561432	0.524967	0.926877	0.755499	0.298757	0.478313	0.57927	0.32952	0.66001	0.847272	0.795572		0.581331	0.0564482	13
0 Ca2+	0.0109331	0.00469891	0.0327906												0.0161409	0.00851716	3
