# Supplementary material for: Agonist-mediated switching of ion selectivity in TPC2 differentially promotes lysosomal function
Source: eLife. 2020 Mar 16;9:e54712. doi: 10.7554/eLife.54712 (PMC7108868; doi:10.7554/eLife.54712)
Supplement: Figure 1—figure supplement 3—source data 1. [file elife-54712-fig1-figsupp3-data1.xlsx]

## Sheet: Fig 1 - SI3A
Figure 1 - figure supplement 3 A) HEK293 cells transiently transfected with hTRPML1, stimulated with TPC2-A1-N and ML-SA1
cell1	cell2	cell3	cell4	cell5	cell6	mean	time [s]
0.474006	0.524903	0.555885	0.499838	0.470294	0.469834	0.499127	2
0.473037	0.524445	0.555923	0.499797	0.469713	0.468525	0.498573	4
0.471814	0.523928	0.556198	0.499578	0.468984	0.469105	0.498268	6
0.471644	0.52262	0.555479	0.498965	0.46783	0.46813	0.497445	8
0.472112	0.52267	0.556573	0.500164	0.468453	0.468442	0.498069	10
0.472744	0.522397	0.557319	0.500414	0.469985	0.468691	0.498592	12
0.472608	0.521351	0.558125	0.500926	0.471175	0.468919	0.498851	14
0.471086	0.520615	0.55958	0.50147	0.47153	0.468149	0.498738	16
0.471606	0.519101	0.559906	0.501197	0.471509	0.467478	0.498466	18
0.470836	0.519149	0.560064	0.501655	0.471298	0.466341	0.498224	20
0.470917	0.520719	0.560933	0.502618	0.473905	0.466318	0.499235	22
0.470185	0.518747	0.561261	0.501796	0.472477	0.466217	0.498447	24
0.46984	0.517563	0.560485	0.501448	0.471222	0.464958	0.497586	26
0.470131	0.518136	0.5592	0.500206	0.470288	0.464187	0.497025	28
0.469576	0.516506	0.557186	0.499656	0.469034	0.463791	0.495958	30
0.469372	0.516094	0.557269	0.499968	0.468943	0.464873	0.496086	32
0.46728	0.517605	0.555246	0.498231	0.468082	0.464223	0.495111	34
0.466417	0.520328	0.554701	0.498386	0.4678	0.464003	0.495272	36
0.466384	0.522451	0.554217	0.497647	0.468655	0.464178	0.495589	38
0.466187	0.521636	0.555199	0.49838	0.46866	0.464771	0.495806	40
0.464843	0.520126	0.554517	0.497912	0.467901	0.464917	0.495036	42
0.463826	0.519395	0.553825	0.497196	0.467451	0.464231	0.494321	44
0.462964	0.52015	0.553388	0.496483	0.467477	0.46403	0.494082	46
0.463718	0.520344	0.552661	0.495888	0.465919	0.465086	0.493936	48
0.463105	0.523285	0.551894	0.495089	0.46478	0.464138	0.493715	50	addition of TPC2-A1-N
0.462296	0.524189	0.550253	0.49426	0.463415	0.463046	0.49291	52
0.462315	0.527369	0.550472	0.49382	0.465338	0.462415	0.493622	54
0.461935	0.5275	0.549391	0.49459	0.466339	0.461871	0.493604	56
0.462611	0.529055	0.549573	0.495267	0.468398	0.462442	0.494558	58
0.461177	0.529183	0.54704	0.493413	0.467085	0.461916	0.493302	60
0.460816	0.529432	0.547354	0.493395	0.466551	0.461588	0.493189	62
0.460379	0.529563	0.546545	0.493399	0.467051	0.462073	0.493168	64
0.461342	0.530693	0.546325	0.493806	0.46873	0.462764	0.493943	66
0.46094	0.531774	0.545604	0.493584	0.470134	0.463077	0.494186	68
0.45951	0.532422	0.543672	0.492004	0.470071	0.462842	0.49342	70
0.459801	0.534201	0.543917	0.491933	0.471462	0.464374	0.494281	72
0.459842	0.534584	0.545069	0.493136	0.471199	0.4662	0.495005	74
0.459343	0.534275	0.545374	0.492582	0.470033	0.465572	0.49453	76
0.458104	0.534432	0.545012	0.492301	0.471627	0.464602	0.494346	78
0.458687	0.537769	0.547231	0.493694	0.473809	0.465782	0.496162	80
0.459145	0.539909	0.546433	0.493699	0.472191	0.46577	0.496191	82
0.459852	0.542832	0.547896	0.494076	0.472486	0.466774	0.497319	84
0.460412	0.543497	0.54687	0.493644	0.472075	0.466652	0.497192	86
0.459064	0.543263	0.547522	0.493615	0.471062	0.466469	0.496833	88
0.460386	0.544697	0.548587	0.4941	0.471226	0.466486	0.49758	90
0.460816	0.545542	0.549502	0.494651	0.471454	0.466766	0.498122	92
0.459996	0.54503	0.549919	0.49508	0.470768	0.466796	0.497932	94
0.460052	0.544664	0.550302	0.495002	0.470997	0.465952	0.497828	96
0.458517	0.545206	0.549557	0.49507	0.473558	0.465805	0.497952	98
0.45854	0.545973	0.550384	0.495463	0.474581	0.465745	0.498447	100
0.458724	0.54633	0.551571	0.495613	0.473155	0.465778	0.498529	102
0.456199	0.545552	0.550604	0.49392	0.471869	0.464824	0.497161	104
0.45501	0.544217	0.549733	0.493677	0.469876	0.464106	0.496103	106
0.454945	0.545849	0.551198	0.493743	0.470272	0.465399	0.496901	108
0.453559	0.546201	0.549428	0.492295	0.469383	0.4647	0.495928	110
0.453106	0.546265	0.548961	0.492706	0.470545	0.464611	0.496032	112
0.451731	0.547152	0.547889	0.49184	0.469637	0.462568	0.495136	114
0.452512	0.547535	0.548687	0.492613	0.471306	0.462897	0.495925	116
0.452498	0.547303	0.547839	0.492031	0.472301	0.463495	0.495911	118
0.452387	0.54769	0.547094	0.49092	0.472825	0.462619	0.495589	120
0.45056	0.546599	0.543794	0.488766	0.473239	0.461309	0.494044	122
0.449022	0.546577	0.542401	0.488115	0.473085	0.46196	0.493527	124
0.447112	0.546321	0.540829	0.486206	0.472365	0.461659	0.492415	126
0.44553	0.544253	0.539868	0.485588	0.47181	0.462744	0.491632	128
0.443918	0.542625	0.538187	0.484553	0.470399	0.462836	0.49042	130
0.443533	0.541021	0.535501	0.48334	0.469328	0.46246	0.489197	132
0.44308	0.539501	0.532778	0.4822	0.467945	0.461069	0.487762	134
0.443065	0.538372	0.531649	0.481591	0.466887	0.461143	0.487118	136
0.442123	0.536957	0.529442	0.47954	0.465655	0.459251	0.485495	138
0.441515	0.536456	0.527687	0.478422	0.4659	0.459506	0.484914	140
0.439322	0.536706	0.525175	0.475442	0.464189	0.457985	0.483137	142
0.4386	0.538078	0.523974	0.47458	0.463407	0.458091	0.482789	144
0.437468	0.536779	0.522097	0.473515	0.46363	0.458034	0.48192	146
0.436572	0.535195	0.521575	0.47354	0.46419	0.457762	0.481472	148
0.434459	0.534408	0.518228	0.470497	0.461323	0.457886	0.479467	150
0.434135	0.534622	0.517181	0.469802	0.46223	0.458936	0.479484	152
0.433436	0.534466	0.515968	0.469816	0.46454	0.458249	0.479413	154
0.432602	0.531492	0.5158	0.469263	0.465959	0.458815	0.478988	156
0.431571	0.530325	0.514941	0.469105	0.468039	0.460102	0.479014	158
0.430303	0.527463	0.512697	0.467206	0.466886	0.458831	0.477231	160
0.430026	0.526304	0.512814	0.467994	0.466803	0.459297	0.477206	162
0.429396	0.525897	0.512521	0.467619	0.467335	0.458179	0.476824	164
0.428817	0.525809	0.511252	0.466156	0.467124	0.457195	0.476059	166
0.428076	0.525336	0.509983	0.465129	0.466316	0.455955	0.475132	168
0.427501	0.526373	0.509077	0.465133	0.465478	0.456138	0.47495	170
0.426024	0.524027	0.507772	0.464085	0.465219	0.456345	0.473912	172
0.424838	0.521603	0.506896	0.463705	0.465057	0.456134	0.473039	174
0.423936	0.518781	0.504486	0.461868	0.463605	0.455193	0.471311	176
0.42338	0.518114	0.505244	0.462069	0.464614	0.45408	0.47125	178
0.423025	0.518777	0.504146	0.461444	0.464496	0.455282	0.471195	180
0.423044	0.517366	0.504273	0.461764	0.463182	0.45482	0.470742	182
0.42299	0.515273	0.50328	0.460639	0.462826	0.454199	0.469868	184
0.423743	0.513796	0.503446	0.461267	0.46174	0.454579	0.469762	186
0.42302	0.511706	0.501558	0.45984	0.459746	0.454351	0.46837	188
0.422647	0.511453	0.500374	0.459766	0.45903	0.453452	0.467787	190
0.423497	0.511312	0.500033	0.4599	0.462	0.45435	0.468515	192
0.423457	0.511594	0.499154	0.460015	0.46321	0.454421	0.468642	194
0.423917	0.510706	0.49917	0.45935	0.463062	0.454129	0.468389	196
0.423407	0.509485	0.499064	0.459029	0.464434	0.454716	0.468356	198
0.423506	0.508587	0.498586	0.458766	0.464948	0.454664	0.468176	200
0.423373	0.508563	0.4989	0.459655	0.464735	0.455827	0.468509	202
0.424132	0.510034	0.499736	0.460177	0.465099	0.456143	0.46922	204
0.42281	0.507662	0.498723	0.458493	0.463781	0.455019	0.467748	206
0.423785	0.506353	0.498533	0.458899	0.461749	0.454587	0.467318	208
0.423911	0.503884	0.497834	0.458581	0.461118	0.454191	0.466586	210
0.423091	0.503407	0.496852	0.458432	0.462048	0.45495	0.466463	212
0.422644	0.50061	0.495527	0.457239	0.459384	0.453871	0.464879	214
0.422506	0.499119	0.494254	0.456133	0.457423	0.453357	0.463799	216
0.421886	0.497013	0.493662	0.455229	0.455982	0.452171	0.462657	218
0.421853	0.495439	0.493914	0.45515	0.455879	0.45289	0.462521	220
0.422035	0.493732	0.493148	0.453826	0.454648	0.453878	0.461878	222
0.420772	0.493125	0.493099	0.453454	0.453008	0.453238	0.461116	224
0.421514	0.49381	0.494406	0.454102	0.450946	0.454983	0.461627	226
0.421957	0.495888	0.495284	0.454874	0.450747	0.454756	0.462251	228
0.422344	0.496339	0.495542	0.45489	0.450923	0.455246	0.462547	230
0.422232	0.49577	0.497332	0.455983	0.449909	0.456167	0.462899	232
0.421591	0.494569	0.497524	0.45541	0.449018	0.455126	0.462206	234
0.421847	0.494879	0.499561	0.456974	0.449139	0.456286	0.463114	236
0.421985	0.495356	0.499766	0.457364	0.448704	0.457741	0.463486	238
0.421606	0.494288	0.499979	0.457614	0.448837	0.45786	0.463364	240
0.421906	0.494515	0.499246	0.457206	0.451717	0.45863	0.46387	242
0.420642	0.49479	0.497881	0.456104	0.451227	0.459057	0.463283	244
0.420617	0.495675	0.497531	0.456399	0.451744	0.458411	0.463396	246
0.420772	0.495387	0.497657	0.456588	0.452218	0.457978	0.463433	248
0.421033	0.493554	0.498207	0.457163	0.45196	0.456554	0.463078	250
0.420841	0.492545	0.498204	0.456781	0.452396	0.455843	0.462768	252
0.419998	0.492095	0.497421	0.457073	0.451394	0.454137	0.46202	254
0.419731	0.491844	0.498214	0.456497	0.451591	0.453918	0.461966	256
0.419038	0.490861	0.49752	0.456698	0.450808	0.452608	0.461255	258
0.419767	0.489479	0.497541	0.457711	0.452186	0.452882	0.461594	260
0.420483	0.490381	0.497439	0.457197	0.452461	0.453204	0.461861	262
0.421193	0.489921	0.496954	0.457284	0.451751	0.451293	0.461399	264
0.421336	0.490519	0.498595	0.45768	0.452992	0.450463	0.461931	266
0.421504	0.488924	0.500556	0.459237	0.454692	0.451612	0.462754	268
0.422319	0.488243	0.501751	0.46053	0.455176	0.451218	0.463206	270
0.422659	0.488057	0.50359	0.461595	0.455802	0.452657	0.46406	272
0.420646	0.485424	0.503073	0.460193	0.45485	0.450629	0.462469	274
0.420912	0.485706	0.503382	0.461136	0.455022	0.450794	0.462825	276
0.419961	0.484554	0.505501	0.461551	0.452874	0.449866	0.462384	278
0.419297	0.486138	0.505051	0.461815	0.451539	0.44918	0.46217	280
0.418058	0.485346	0.503473	0.460249	0.449851	0.447702	0.46078	282
0.419139	0.48545	0.503961	0.460176	0.447449	0.449593	0.460961	284
0.418284	0.485645	0.50402	0.460502	0.447016	0.45009	0.460926	286
0.418587	0.484375	0.505578	0.462129	0.446711	0.451106	0.461414	288
0.419554	0.483034	0.507963	0.464327	0.448284	0.452862	0.462671	290
0.418426	0.480842	0.506073	0.462074	0.447785	0.45145	0.461108	292
0.41933	0.480323	0.50681	0.461855	0.448863	0.451824	0.461501	294
0.420367	0.480457	0.506558	0.461895	0.448259	0.451462	0.4615	296
0.420377	0.481041	0.508007	0.463424	0.44744	0.452406	0.462116	298
0.420182	0.479831	0.508296	0.46375	0.448161	0.452726	0.462158	300
0.420052	0.481324	0.508525	0.463239	0.447684	0.452028	0.462142	302
0.419976	0.481347	0.507653	0.464256	0.447482	0.451485	0.462033	304
0.421002	0.481751	0.507434	0.4635	0.448018	0.45162	0.462221	306
0.421274	0.481064	0.507883	0.464141	0.448493	0.452055	0.462485	308
0.421255	0.479303	0.509742	0.46392	0.447433	0.451796	0.462241	310
0.420933	0.479401	0.509496	0.463663	0.447043	0.45258	0.462186	312
0.421113	0.477638	0.50928	0.463928	0.447077	0.452457	0.461915	314
0.421665	0.477479	0.511723	0.465868	0.446683	0.453371	0.462798	316
0.421943	0.477129	0.513664	0.466771	0.448795	0.453815	0.463686	318
0.423148	0.478775	0.513885	0.466157	0.448963	0.4539	0.464138	320
0.42225	0.475533	0.511106	0.464604	0.448765	0.453392	0.462608	322
0.42239	0.47542	0.510738	0.464967	0.451753	0.453553	0.463137	324
0.422618	0.474963	0.512061	0.467296	0.450331	0.454458	0.463621	326
0.423015	0.475533	0.513124	0.468256	0.449357	0.454434	0.463953	328
0.424673	0.478127	0.516022	0.470155	0.450465	0.455666	0.465851	330
0.423755	0.475077	0.51678	0.46992	0.450392	0.45367	0.464932	332
0.424699	0.475152	0.518875	0.47349	0.451436	0.455178	0.466472	334
0.425761	0.476273	0.520361	0.472978	0.451804	0.454655	0.466972	336
0.425472	0.479821	0.521034	0.472862	0.451359	0.454737	0.467548	338
0.424956	0.48087	0.521759	0.472718	0.451122	0.4549	0.467721	340
0.424946	0.479543	0.521842	0.472469	0.451139	0.454267	0.467368	342
0.424767	0.478578	0.522671	0.473304	0.451091	0.455052	0.467577	344
0.42597	0.479586	0.523033	0.47279	0.450744	0.454487	0.467768	346
0.42711	0.480666	0.521344	0.471544	0.451169	0.455182	0.467836	348
0.426798	0.480051	0.519544	0.470661	0.450067	0.454863	0.466997	350
0.427303	0.481599	0.519808	0.470991	0.449495	0.455626	0.46747	352
0.427062	0.481038	0.520792	0.473088	0.449192	0.455211	0.46773	354
0.428251	0.48052	0.522607	0.472923	0.44966	0.455704	0.468278	356
0.429046	0.479441	0.520436	0.471111	0.448333	0.454653	0.46717	358
0.429359	0.480204	0.519619	0.469939	0.450119	0.455567	0.467468	360
0.42855	0.479127	0.517504	0.469667	0.451085	0.455938	0.466978	362
0.428235	0.481324	0.515448	0.467971	0.450198	0.45553	0.466451	364
0.428989	0.482962	0.516009	0.468891	0.451008	0.457013	0.467479	366
0.429322	0.482605	0.514201	0.467834	0.451089	0.457538	0.467098	368
0.429026	0.481058	0.512634	0.467121	0.45109	0.457043	0.466329	370
0.428869	0.479666	0.510964	0.46555	0.449928	0.455835	0.465135	372
0.429265	0.479554	0.510116	0.465599	0.449896	0.456475	0.465151	374
0.428889	0.479254	0.508508	0.465388	0.449407	0.457931	0.464896	376
0.428751	0.478261	0.507379	0.465185	0.448689	0.457304	0.464262	378
0.429332	0.481086	0.506566	0.465418	0.448217	0.457713	0.464722	380
0.430676	0.483667	0.506744	0.465181	0.449047	0.460175	0.465915	382
0.431077	0.484062	0.506753	0.465312	0.449267	0.459323	0.465966	384
0.430537	0.483662	0.506575	0.465218	0.449555	0.461043	0.466098	386
0.430843	0.484222	0.506308	0.465279	0.448736	0.461833	0.466204	388
0.431889	0.483602	0.508984	0.467009	0.449656	0.462836	0.467329	390
0.433035	0.483211	0.510499	0.469126	0.449641	0.462053	0.467928	392
0.431466	0.479092	0.50982	0.469058	0.448497	0.461024	0.466493	394
0.430959	0.475937	0.510204	0.468799	0.448719	0.460189	0.465801	396
0.431408	0.475542	0.509293	0.468794	0.44987	0.460265	0.465862	398
0.430792	0.474556	0.509273	0.468641	0.449838	0.460589	0.465615	400
0.43032	0.473814	0.508814	0.468549	0.450084	0.459847	0.465238	402
0.429902	0.474186	0.507884	0.467663	0.449618	0.459368	0.46477	404
0.428703	0.474357	0.506955	0.466705	0.449734	0.458538	0.464165	406
0.428142	0.475131	0.508048	0.466742	0.449955	0.458013	0.464339	408
0.428635	0.475779	0.507836	0.468527	0.451688	0.458006	0.465079	410
0.42831	0.47417	0.506869	0.467212	0.451624	0.457468	0.464275	412
0.428318	0.472644	0.506594	0.467016	0.450156	0.457418	0.463691	414
0.43352	0.473955	0.507098	0.467857	0.451401	0.458696	0.465421	416
0.437541	0.473507	0.507296	0.467259	0.450954	0.459181	0.465956	418
0.443057	0.473282	0.507836	0.468791	0.45253	0.460204	0.467617	420
0.445732	0.472387	0.507386	0.470237	0.451226	0.460617	0.467931	422
0.445824	0.472173	0.507179	0.472972	0.451644	0.461737	0.468588	424
0.444711	0.47227	0.508293	0.472584	0.452593	0.463816	0.469044	426
0.443916	0.471973	0.508725	0.471625	0.45272	0.465166	0.469021	428
0.443354	0.472175	0.511175	0.472243	0.454287	0.46588	0.469852	430
0.442124	0.470957	0.510444	0.470119	0.454114	0.466241	0.469	432
0.441449	0.469372	0.507898	0.468241	0.452738	0.464999	0.467449	434
0.440958	0.471669	0.508741	0.469395	0.453038	0.466302	0.468351	436
0.440945	0.472883	0.510047	0.470106	0.45308	0.466621	0.468947	438
0.440896	0.473844	0.508609	0.470286	0.455322	0.468316	0.469546	440
0.440178	0.4728	0.50864	0.469664	0.456224	0.469443	0.469492	442
0.440604	0.471112	0.508262	0.470129	0.457001	0.468436	0.469257	444
0.441359	0.474546	0.508415	0.47034	0.457536	0.46925	0.470241	446
0.442338	0.475036	0.507186	0.469958	0.458312	0.470948	0.47063	448
0.442469	0.47313	0.506424	0.469261	0.457797	0.4714	0.47008	450	addition of ML-SA1
0.442465	0.472349	0.506754	0.468193	0.456878	0.469138	0.469296	452
0.488923	0.545311	1.013	0.697556	0.50284	0.520399	0.628006	454
0.605239	0.685775	1.2796	0.859681	0.584534	0.605237	0.770011	456
0.707981	0.811805	1.34434	0.924728	0.650967	0.682138	0.85366	458
0.761896	0.915838	1.37509	0.974674	0.706753	0.740571	0.91247	460
0.818239	1.03211	1.39599	1.03025	0.750302	0.784824	0.968619	462
0.881647	1.199	1.41646	1.07903	0.79338	0.8219	1.0319	464
0.915021	1.29835	1.43032	1.10412	0.841562	0.852096	1.07358	466
0.936314	1.34796	1.43946	1.12309	0.881958	0.886497	1.10255	468
0.953704	1.38251	1.449	1.13718	0.906479	0.931199	1.12668	470
0.964307	1.40395	1.4607	1.14807	0.924163	0.985343	1.14775	472
0.974748	1.42142	1.47022	1.15692	0.937118	1.04665	1.16784	474
0.983394	1.43493	1.47503	1.16363	0.949196	1.09761	1.18397	476
0.993916	1.45043	1.48557	1.17185	0.963281	1.13821	1.20054	478
1.00302	1.45928	1.49346	1.17809	0.972248	1.16844	1.21242	480
1.01456	1.47203	1.49825	1.18468	0.985172	1.19476	1.22491	482
1.02262	1.47987	1.50523	1.1881	0.994623	1.21537	1.2343	484
1.0328	1.48147	1.51041	1.19264	1.00394	1.2364	1.24294	486
1.04097	1.47882	1.51242	1.19456	1.01144	1.25311	1.24855	488
1.05213	1.47948	1.5173	1.20124	1.02182	1.27318	1.25753	490
1.0568	1.47531	1.52046	1.20208	1.02658	1.28567	1.26115	492
1.06426	1.47303	1.52636	1.20645	1.03427	1.30031	1.26745	494
1.06732	1.46844	1.53398	1.20965	1.03976	1.31569	1.27247	496
1.06955	1.46013	1.54179	1.21646	1.04743	1.32964	1.2775	498
1.07043	1.45922	1.54831	1.21932	1.05401	1.34117	1.28208	500
1.07129	1.45757	1.55721	1.22471	1.06554	1.35685	1.28886	502
1.07187	1.45382	1.56345	1.22926	1.07385	1.37018	1.29374	504
1.07512	1.45814	1.57074	1.23405	1.08508	1.38545	1.30143	506
1.07603	1.45897	1.57293	1.23542	1.09339	1.39314	1.30498	508
1.08169	1.4646	1.58275	1.24399	1.10787	1.41008	1.31516	510
1.08803	1.46913	1.59142	1.25062	1.1206	1.42131	1.32352	512
1.09513	1.47671	1.60219	1.25777	1.135	1.43406	1.33348	514
1.10302	1.48683	1.61379	1.26627	1.15456	1.44695	1.34524	516
1.11034	1.49608	1.61961	1.27224	1.17286	1.46169	1.35547	518
1.11673	1.50086	1.62442	1.27591	1.19111	1.46992	1.36316	520
1.12627	1.50877	1.63214	1.28265	1.21035	1.48065	1.37347	522
1.13247	1.51708	1.6358	1.28655	1.22792	1.48478	1.38077	524
1.14045	1.52434	1.64376	1.29237	1.24771	1.49991	1.39142	526
1.1467	1.53118	1.64618	1.29585	1.26419	1.50852	1.39877	528
1.14938	1.53472	1.64517	1.29345	1.27229	1.51335	1.40139	530
1.15674	1.54621	1.65226	1.29798	1.28423	1.52655	1.41066	532
1.1638	1.55556	1.66173	1.30628	1.29605	1.53805	1.42025	534
1.16941	1.55876	1.66528	1.30763	1.3043	1.54614	1.42525	536
1.17498	1.56514	1.67193	1.30986	1.31038	1.55819	1.43174	538
1.1832	1.57513	1.67673	1.31444	1.31604	1.5714	1.43949	540
1.18597	1.57398	1.67832	1.3125	1.31839	1.5815	1.44178	542
1.18864	1.57866	1.68134	1.31479	1.32054	1.59333	1.44622	544
1.18954	1.58141	1.68706	1.31876	1.32635	1.60439	1.45125	546
1.19522	1.58454	1.69301	1.32257	1.33185	1.61219	1.45656	548
1.19988	1.59341	1.69967	1.32668	1.3371	1.62386	1.46343	550
1.2016	1.59725	1.705	1.32724	1.33804	1.63124	1.46673	552
1.2083	1.6064	1.71225	1.33107	1.34353	1.64451	1.47434	554
1.2112	1.60953	1.71396	1.33285	1.34397	1.65265	1.47736	556
1.2135	1.6135	1.71856	1.33501	1.34529	1.66604	1.48198	558
1.21504	1.61621	1.72056	1.33798	1.34805	1.67118	1.48484	560
1.21833	1.62031	1.73037	1.34149	1.34978	1.68217	1.49041	562
1.22108	1.62366	1.73058	1.34327	1.35068	1.6911	1.49339	564
1.22629	1.62538	1.73923	1.34698	1.35315	1.69933	1.49839	566
1.22289	1.62356	1.73778	1.34553	1.35027	1.70346	1.49725	568
1.22016	1.62592	1.73892	1.34643	1.34887	1.70921	1.49825	570
1.22321	1.6286	1.74907	1.3512	1.35118	1.71766	1.50349	572
1.22581	1.62564	1.75136	1.35278	1.35368	1.72398	1.50554	574
1.22774	1.63327	1.7532	1.35615	1.35515	1.72617	1.50861	576
1.23093	1.6322	1.76088	1.36037	1.35831	1.72953	1.51204	578
1.23508	1.63469	1.76647	1.3647	1.36084	1.7367	1.51641	580
1.23886	1.63822	1.77031	1.36764	1.36248	1.74131	1.5198	582
1.2459	1.64465	1.78095	1.37475	1.36593	1.74873	1.52682	584
1.24407	1.6423	1.77845	1.37219	1.36301	1.74594	1.52433	586
1.23868	1.63747	1.77232	1.36692	1.35894	1.7459	1.52004	588
1.24434	1.64306	1.77659	1.37133	1.35958	1.75015	1.52417	590
1.24717	1.64664	1.77981	1.37372	1.36205	1.75683	1.5277	592
1.2527	1.65361	1.78527	1.37561	1.36519	1.7619	1.53238	594
1.24769	1.64973	1.77971	1.37276	1.36137	1.75708	1.52806	596
1.24911	1.65467	1.78585	1.37427	1.36408	1.76144	1.53157	598
1.25378	1.66333	1.79006	1.37863	1.36687	1.76725	1.53665	600
1.25764	1.66989	1.79704	1.38277	1.36878	1.77296	1.54151	602
1.25568	1.67379	1.7931	1.37996	1.36756	1.76921	1.53988	604
1.25601	1.6719	1.78844	1.37752	1.36929	1.76849	1.53861	606
1.25465	1.67277	1.78487	1.37756	1.36671	1.76583	1.53707	608
1.25612	1.67742	1.78983	1.37859	1.3701	1.76649	1.53976	610
1.26479	1.68265	1.79599	1.3831	1.374	1.76985	1.54506	612
1.26657	1.68512	1.79838	1.38633	1.37716	1.76984	1.54723	614
1.2674	1.68647	1.79499	1.38366	1.37614	1.76718	1.54597	616
1.26714	1.6798	1.79712	1.38586	1.37793	1.76288	1.54512	618
1.26725	1.68093	1.79523	1.38668	1.37827	1.75628	1.54411	620
1.27473	1.6856	1.79582	1.38815	1.3807	1.74794	1.54549	622
1.27794	1.69151	1.80493	1.39003	1.38708	1.74103	1.54875	624
1.27938	1.69777	1.81039	1.39518	1.39247	1.74334	1.55309	626
1.27818	1.69734	1.81208	1.39692	1.39397	1.73975	1.55304	628
1.27787	1.69147	1.80875	1.39644	1.3942	1.73733	1.55101	630
1.28038	1.69362	1.81402	1.40051	1.39916	1.74632	1.55567	632
1.28344	1.69128	1.81659	1.40302	1.40256	1.747	1.55731	634
1.29028	1.694	1.82127	1.40864	1.40796	1.75495	1.56285	636
1.29659	1.70308	1.83627	1.4217	1.41821	1.77269	1.57476	638
1.29376	1.6992	1.83269	1.4188	1.41819	1.77872	1.57356	640
1.29338	1.70107	1.8353	1.42188	1.42382	1.79007	1.57759	642
1.2937	1.6994	1.83581	1.42437	1.42403	1.80444	1.58029	644
1.29144	1.69923	1.83989	1.42728	1.42804	1.8149	1.58346	646
1.2951	1.70436	1.84586	1.4342	1.43606	1.83321	1.59147	648
1.29626	1.70652	1.85297	1.44089	1.43861	1.84466	1.59665	650

## Sheet: Fig 1 - SI3B
Figure 1 - figure supplement 3 B) HEK293 cells transiently transfected with hTRPML1, stimulated with TPC2-A1-P and ML-SA1
cell1	cell2	cell3	cell4	cell5	cell6	mean	time [s]
0.402447	0.42848	0.378698	0.377926	0.386576	0.39308	0.394535	2
0.401336	0.428559	0.378015	0.378831	0.387876	0.394107	0.394787	4
0.400436	0.428152	0.378099	0.378585	0.388454	0.393	0.394454	6
0.400548	0.429103	0.378024	0.378866	0.388699	0.392997	0.394706	8
0.39899	0.427955	0.377561	0.377578	0.38832	0.392168	0.393762	10
0.398174	0.428055	0.377803	0.376079	0.388276	0.39221	0.393433	12
0.400335	0.430347	0.379645	0.377527	0.390808	0.393805	0.395411	14
0.399082	0.427681	0.377934	0.376161	0.389353	0.392457	0.393778	16
0.399331	0.427881	0.378073	0.375721	0.389572	0.392664	0.393874	18
0.399092	0.427889	0.377781	0.375677	0.38912	0.392585	0.393691	20
0.398015	0.426866	0.377174	0.374449	0.388236	0.391439	0.392697	22
0.3979	0.426684	0.377227	0.374527	0.388892	0.391313	0.392757	24
0.399385	0.426562	0.376386	0.375918	0.388958	0.391823	0.393172	26
0.397459	0.425487	0.375989	0.374974	0.387725	0.390399	0.392006	28
0.396329	0.42484	0.373995	0.373772	0.387604	0.389717	0.391043	30
0.396778	0.425255	0.374572	0.374783	0.388432	0.390373	0.391699	32
0.394749	0.423924	0.373002	0.373526	0.3876	0.389755	0.390426	34
0.395653	0.424751	0.37389	0.374828	0.38811	0.390407	0.391273	36
0.395262	0.425119	0.373705	0.37562	0.387634	0.390255	0.391266	38
0.39452	0.426089	0.373839	0.375551	0.386843	0.390072	0.391152	40
0.39513	0.425395	0.37352	0.375405	0.385331	0.390036	0.390803	42
0.395378	0.425793	0.374269	0.375784	0.386305	0.389837	0.391228	44
0.396271	0.426122	0.374991	0.375631	0.384968	0.388749	0.391122	46
0.395176	0.424894	0.373368	0.374414	0.382966	0.387666	0.389747	48
0.395655	0.426152	0.373868	0.375157	0.384859	0.389962	0.390942	50	addition of TPC2-A1-P
0.395755	0.424988	0.37356	0.374789	0.383924	0.391376	0.390732	52
0.396379	0.425958	0.373963	0.375555	0.384773	0.392342	0.391495	54
0.396917	0.425898	0.374417	0.376111	0.384565	0.392365	0.391712	56
0.396334	0.425692	0.372942	0.375251	0.383447	0.391055	0.390787	58
0.394637	0.425166	0.372363	0.374851	0.383424	0.390819	0.39021	60
0.394098	0.424074	0.370734	0.374525	0.382549	0.390066	0.389341	62
0.392206	0.422504	0.369121	0.373401	0.380377	0.387753	0.38756	64
0.390893	0.420857	0.367767	0.372856	0.379746	0.387238	0.386559	66
0.391712	0.420484	0.366615	0.371942	0.378449	0.386019	0.38587	68
0.388716	0.41813	0.364302	0.370485	0.376649	0.382815	0.383516	70
0.387857	0.418157	0.364196	0.37087	0.375539	0.381351	0.382995	72
0.386881	0.418981	0.364165	0.370468	0.37493	0.379942	0.382561	74
0.385062	0.418585	0.362985	0.370404	0.375082	0.378343	0.381743	76
0.384163	0.419104	0.362935	0.369891	0.376045	0.377737	0.381646	78
0.383224	0.418524	0.362579	0.370365	0.376315	0.377232	0.381373	80
0.381573	0.416901	0.361181	0.368758	0.374558	0.374819	0.379631	82
0.379626	0.416676	0.360678	0.368196	0.37372	0.373318	0.378702	84
0.379614	0.417747	0.360444	0.368668	0.373653	0.3729	0.378838	86
0.376892	0.41565	0.359234	0.367914	0.3726	0.372903	0.377532	88
0.377236	0.416374	0.359238	0.36765	0.373951	0.374327	0.37813	90
0.378038	0.416953	0.359218	0.369209	0.375043	0.375302	0.37896	92
0.37667	0.416043	0.358375	0.367436	0.373152	0.372938	0.377436	94
0.377199	0.416213	0.358081	0.368139	0.373872	0.372565	0.377678	96
0.376123	0.416196	0.358417	0.368758	0.373792	0.371988	0.377546	98
0.375108	0.415481	0.357421	0.36798	0.372162	0.370894	0.376508	100
0.374913	0.415455	0.35699	0.36879	0.372699	0.370553	0.376567	102
0.3744	0.41622	0.357849	0.368653	0.372511	0.3702	0.376639	104
0.372138	0.414179	0.356646	0.367593	0.371335	0.368588	0.37508	106
0.371836	0.415029	0.356806	0.367787	0.372196	0.369559	0.375536	108
0.370818	0.414545	0.357293	0.367737	0.373079	0.369661	0.375522	110
0.370097	0.414407	0.35716	0.367839	0.372573	0.369398	0.375246	112
0.37002	0.414602	0.357858	0.369048	0.374345	0.36988	0.375959	114
0.369602	0.414347	0.357406	0.369346	0.373329	0.368825	0.375476	116
0.369655	0.414173	0.35754	0.368638	0.372401	0.368036	0.375074	118
0.367701	0.415534	0.357342	0.368074	0.371456	0.368491	0.374766	120
0.3667	0.415368	0.357212	0.367012	0.370293	0.368646	0.374205	122
0.366659	0.414408	0.355874	0.366739	0.36958	0.367637	0.373483	124
0.367546	0.415701	0.357158	0.367378	0.371793	0.368396	0.374662	126
0.366239	0.415856	0.357248	0.366943	0.371879	0.369313	0.37458	128
0.366372	0.41583	0.35646	0.36665	0.371595	0.368476	0.374231	130
0.366883	0.416343	0.357886	0.367111	0.371258	0.368754	0.374706	132
0.368013	0.417	0.358432	0.366653	0.369906	0.369051	0.374842	134
0.36842	0.416669	0.358951	0.366861	0.368926	0.368521	0.374725	136
0.368861	0.418385	0.359235	0.367557	0.369397	0.369138	0.375429	138
0.369061	0.417647	0.359478	0.367466	0.368495	0.367847	0.374999	140
0.369147	0.41666	0.358546	0.366668	0.366474	0.367977	0.374245	142
0.369701	0.41758	0.359794	0.366683	0.366691	0.367928	0.374729	144
0.369162	0.418168	0.35981	0.366515	0.365892	0.367404	0.374492	146
0.368325	0.417288	0.359674	0.365984	0.36559	0.365437	0.373716	148
0.368952	0.417496	0.359853	0.366743	0.365714	0.36529	0.374008	150
0.367943	0.417909	0.359948	0.366813	0.365424	0.365413	0.373908	152
0.36714	0.416917	0.35966	0.366609	0.365403	0.363892	0.37327	154
0.366369	0.416184	0.359664	0.367258	0.365744	0.364455	0.373279	156
0.367786	0.417017	0.360382	0.367576	0.367055	0.365251	0.374178	158
0.366119	0.416167	0.35969	0.367744	0.366876	0.365328	0.373654	160
0.366941	0.416595	0.361242	0.36932	0.369416	0.366778	0.375049	162
0.366799	0.415972	0.361396	0.370121	0.369005	0.366376	0.374945	164
0.367669	0.415898	0.361396	0.370543	0.368796	0.365638	0.37499	166
0.368864	0.415907	0.361624	0.370775	0.36935	0.367062	0.375597	168
0.370142	0.417059	0.362759	0.371772	0.370657	0.368659	0.376841	170
0.369243	0.416481	0.362798	0.371382	0.369423	0.367888	0.376202	172
0.369163	0.415612	0.36376	0.371311	0.370067	0.368891	0.376467	174
0.369453	0.416516	0.364482	0.371671	0.371111	0.369775	0.377168	176
0.368338	0.415564	0.364092	0.370854	0.371149	0.369485	0.37658	178
0.36753	0.414428	0.364601	0.370728	0.371047	0.368993	0.376221	180
0.368312	0.414988	0.365313	0.371413	0.370943	0.369152	0.376687	182
0.369376	0.416117	0.36616	0.372116	0.371369	0.369544	0.377447	184
0.36913	0.414616	0.365078	0.371786	0.370603	0.36844	0.376609	186
0.370448	0.41493	0.365957	0.372489	0.37171	0.369904	0.377573	188
0.368794	0.415735	0.366263	0.373147	0.372052	0.369692	0.377614	190
0.369041	0.415864	0.366538	0.373437	0.371712	0.369339	0.377655	192
0.36903	0.416355	0.367408	0.374482	0.373721	0.371205	0.3787	194
0.368907	0.41607	0.367051	0.374447	0.374913	0.371919	0.378885	196
0.368506	0.415814	0.366829	0.374783	0.374918	0.371493	0.378724	198
0.369002	0.415392	0.366673	0.374259	0.374117	0.370419	0.37831	200
0.368923	0.415755	0.367167	0.375219	0.374909	0.371722	0.378949	202
0.369353	0.416299	0.367886	0.375457	0.374589	0.371387	0.379162	204
0.369402	0.416593	0.367073	0.376186	0.374515	0.37264	0.379401	206
0.370082	0.416558	0.367703	0.377754	0.376501	0.374264	0.380477	208
0.369738	0.416715	0.368352	0.377345	0.375931	0.372918	0.380167	210
0.370028	0.416355	0.368454	0.377613	0.37637	0.373626	0.380408	212
0.370246	0.417278	0.369489	0.378189	0.376945	0.374741	0.381148	214
0.369599	0.415167	0.36761	0.377114	0.375788	0.374314	0.379932	216
0.37038	0.415694	0.368937	0.377939	0.375272	0.374088	0.380385	218
0.371368	0.416571	0.370063	0.378615	0.375194	0.373998	0.380968	220
0.370785	0.416642	0.369466	0.377897	0.374288	0.373764	0.380474	222
0.370735	0.4156	0.369475	0.378728	0.374862	0.374091	0.380582	224
0.370693	0.415478	0.368866	0.379029	0.374059	0.373419	0.380257	226
0.371968	0.415694	0.370023	0.380309	0.37434	0.37467	0.381167	228
0.372771	0.416255	0.371439	0.381615	0.375723	0.375594	0.382233	230
0.373746	0.417268	0.37236	0.383237	0.376179	0.377939	0.383455	232
0.373212	0.416405	0.372874	0.383926	0.377342	0.379553	0.383885	234
0.374548	0.416179	0.373484	0.384475	0.37777	0.380161	0.384436	236
0.374652	0.416144	0.373569	0.385369	0.375949	0.379156	0.38414	238
0.374125	0.41652	0.37343	0.3851	0.37482	0.379233	0.383871	240
0.374976	0.416343	0.373835	0.386152	0.374323	0.379342	0.384162	242
0.375819	0.417285	0.374223	0.386118	0.373868	0.380008	0.384553	244
0.376127	0.416315	0.37462	0.386931	0.372249	0.379982	0.38437	246
0.376169	0.416983	0.376085	0.386835	0.371792	0.380288	0.384692	248
0.375417	0.415792	0.375944	0.387417	0.371578	0.380627	0.384462	250
0.3749	0.414659	0.375188	0.387345	0.370728	0.379673	0.383749	252
0.374187	0.414146	0.375787	0.388225	0.371015	0.379537	0.383816	254
0.374312	0.414834	0.377037	0.388634	0.372467	0.381285	0.384761	256
0.373277	0.414199	0.376931	0.388637	0.372846	0.38142	0.384552	258
0.374841	0.414985	0.377885	0.388921	0.373068	0.38171	0.385235	260
0.375441	0.414866	0.377784	0.388408	0.373112	0.381179	0.385132	262
0.374914	0.414631	0.378537	0.388542	0.372994	0.380407	0.385004	264
0.376623	0.41515	0.37884	0.389825	0.375229	0.382212	0.386313	266
0.376505	0.414662	0.379691	0.389806	0.376137	0.381996	0.386466	268
0.375613	0.413478	0.378753	0.390096	0.377027	0.381893	0.386143	270
0.375961	0.412199	0.378958	0.389879	0.377687	0.381079	0.38596	272
0.376413	0.413714	0.380984	0.391612	0.379964	0.38286	0.387591	274
0.375639	0.413154	0.380814	0.390958	0.380187	0.382937	0.387281	276
0.375492	0.413813	0.383374	0.392919	0.381817	0.383128	0.388424	278
0.375636	0.414235	0.385008	0.394444	0.382128	0.384749	0.389367	280
0.375482	0.414861	0.386343	0.393764	0.381773	0.38499	0.389535	282
0.378036	0.415784	0.388455	0.395606	0.382585	0.386419	0.391148	284
0.378702	0.416632	0.390663	0.397099	0.383379	0.387793	0.392378	286
0.378822	0.414909	0.390945	0.397182	0.383632	0.386448	0.39199	288
0.378594	0.415721	0.391796	0.398534	0.384495	0.387674	0.392802	290
0.37933	0.416467	0.394767	0.398641	0.385507	0.388249	0.393827	292
0.378405	0.413537	0.394093	0.398383	0.384155	0.386599	0.392529	294
0.379232	0.414546	0.39549	0.399495	0.384689	0.387969	0.393571	296
0.379061	0.414612	0.396006	0.399755	0.385437	0.388766	0.39394	298
0.378775	0.41346	0.396293	0.39879	0.384981	0.389079	0.393563	300
0.378673	0.413614	0.397048	0.399381	0.386034	0.389277	0.394005	302
0.377957	0.413302	0.398431	0.40013	0.385951	0.390057	0.394305	304
0.376755	0.412451	0.398323	0.399476	0.387001	0.390636	0.394107	306
0.37757	0.413211	0.399765	0.399959	0.388717	0.391643	0.395144	308
0.37779	0.414081	0.401381	0.400357	0.390503	0.392292	0.396067	310
0.377499	0.41318	0.400717	0.400222	0.389595	0.391441	0.395442	312
0.378321	0.414028	0.40158	0.402089	0.391444	0.392725	0.396698	314
0.377081	0.413747	0.401277	0.402045	0.392273	0.393068	0.396582	316
0.377763	0.414312	0.401338	0.403453	0.394079	0.394881	0.397637	318
0.377011	0.412978	0.400393	0.402406	0.393005	0.394768	0.39676	320
0.376708	0.413195	0.401836	0.402142	0.393313	0.395501	0.397116	322
0.377122	0.412962	0.401565	0.40172	0.393624	0.396825	0.397303	324
0.377063	0.412449	0.401831	0.401597	0.393976	0.396724	0.397273	326
0.377278	0.412265	0.402259	0.400981	0.393856	0.396442	0.39718	328
0.377185	0.410654	0.401001	0.400123	0.392463	0.396111	0.396256	330
0.376408	0.410219	0.401805	0.398434	0.390947	0.395631	0.395574	332
0.378237	0.410496	0.402699	0.400085	0.391989	0.39583	0.396556	334
0.379015	0.410253	0.40363	0.401124	0.392608	0.397045	0.397279	336
0.378863	0.409102	0.403224	0.400542	0.391051	0.396494	0.396546	338
0.380966	0.410426	0.403891	0.402236	0.391989	0.397559	0.397845	340
0.380845	0.410757	0.404702	0.403373	0.393022	0.398691	0.398565	342
0.380926	0.410049	0.405219	0.404245	0.393149	0.399528	0.398853	344
0.380414	0.408987	0.405563	0.404109	0.392197	0.398479	0.398291	346
0.381513	0.409716	0.406472	0.405662	0.393003	0.400016	0.399397	348
0.381828	0.408895	0.406196	0.404883	0.391448	0.397921	0.398528	350
0.382246	0.409881	0.407537	0.406019	0.39202	0.398874	0.39943	352
0.383135	0.410395	0.408938	0.40655	0.391866	0.398985	0.399978	354
0.382385	0.409781	0.409329	0.405825	0.391704	0.398794	0.399636	356
0.382596	0.408847	0.409073	0.406516	0.392058	0.399732	0.399804	358
0.381828	0.408305	0.409476	0.406124	0.392537	0.401768	0.400007	360
0.381993	0.407886	0.409123	0.406757	0.393379	0.402062	0.4002	362
0.38177	0.407977	0.409497	0.406398	0.39326	0.401773	0.400113	364
0.383452	0.409199	0.409924	0.406959	0.393198	0.402931	0.400944	366
0.38261	0.408099	0.409934	0.40689	0.392298	0.402262	0.400349	368
0.382865	0.407603	0.410415	0.406878	0.392428	0.402194	0.400397	370
0.383903	0.407984	0.411628	0.407664	0.391669	0.401864	0.400785	372
0.384048	0.406715	0.410522	0.4073	0.392343	0.402055	0.400497	374
0.384144	0.407916	0.411883	0.409253	0.393689	0.402488	0.401562	376
0.383971	0.40783	0.412162	0.409233	0.394329	0.403191	0.401786	378
0.383728	0.406817	0.41177	0.407936	0.394069	0.40204	0.40106	380
0.383818	0.407513	0.412703	0.410275	0.394605	0.402235	0.401858	382
0.384713	0.406521	0.413521	0.411171	0.395427	0.402756	0.402351	384
0.384338	0.406616	0.413727	0.41107	0.395215	0.402812	0.402296	386
0.383862	0.406342	0.414544	0.411307	0.395928	0.401803	0.402298	388
0.384765	0.405956	0.415146	0.4119	0.397638	0.403281	0.403114	390
0.384704	0.40571	0.415001	0.411545	0.397472	0.404287	0.40312	392
0.385401	0.405074	0.41538	0.412692	0.398894	0.405501	0.403824	394
0.385933	0.406032	0.41618	0.414253	0.400541	0.407364	0.405051	396
0.385912	0.405604	0.417009	0.414709	0.400635	0.407062	0.405155	398
0.386318	0.405212	0.416604	0.416215	0.403071	0.409283	0.406117	400
0.386775	0.405382	0.417302	0.417939	0.404335	0.411801	0.407256	402
0.385667	0.404817	0.416658	0.41873	0.403059	0.411534	0.406744	404
0.386509	0.403977	0.416654	0.420919	0.404101	0.412438	0.407433	406
0.385936	0.403376	0.416024	0.422371	0.405282	0.413383	0.407729	408
0.385421	0.402872	0.415659	0.423342	0.407026	0.415633	0.408325	410
0.386701	0.40261	0.414917	0.424125	0.407879	0.418064	0.409049	412
0.387068	0.402927	0.416035	0.425366	0.409562	0.421377	0.410389	414
0.387095	0.402493	0.416419	0.425108	0.411924	0.423179	0.411036	416
0.386879	0.402614	0.415944	0.424986	0.413429	0.426609	0.411744	418
0.387816	0.4029	0.416827	0.425477	0.415452	0.43008	0.413092	420
0.388676	0.402267	0.417959	0.426223	0.417661	0.434511	0.414549	422
0.388422	0.402941	0.417879	0.426454	0.420126	0.438349	0.415695	424
0.388315	0.403117	0.418612	0.428473	0.420985	0.438956	0.41641	426
0.389684	0.402823	0.418653	0.429105	0.420625	0.43889	0.41663	428
0.388654	0.40187	0.418496	0.429613	0.420215	0.437344	0.416032	430
0.388261	0.401053	0.418064	0.430306	0.419538	0.436742	0.415661	432
0.390672	0.401273	0.419518	0.433443	0.420931	0.438584	0.417403	434
0.390125	0.399916	0.417861	0.432535	0.420017	0.438331	0.416464	436
0.390143	0.398745	0.417421	0.430818	0.418895	0.436625	0.415441	438
0.391688	0.399863	0.418006	0.430219	0.417594	0.434874	0.415374	440
0.392048	0.399627	0.41826	0.429151	0.416747	0.433377	0.414868	442
0.392952	0.399881	0.417766	0.430578	0.416381	0.43392	0.415246	444
0.393261	0.39998	0.418296	0.431881	0.416212	0.432651	0.41538	446
0.391271	0.399046	0.419001	0.431827	0.414577	0.431104	0.414471	448
0.392333	0.399175	0.418506	0.432821	0.415271	0.432064	0.415028	450	addition of ML-SA1
0.392784	0.399558	0.419226	0.433707	0.415816	0.431817	0.415485	452
0.39279	0.39876	0.419787	0.434136	0.415913	0.430816	0.415367	454
0.393793	0.399654	0.420796	0.438382	0.419385	0.432361	0.417395	456
0.394881	0.401459	0.423824	0.44179	0.423405	0.435342	0.420117	458
0.396785	0.401999	0.425899	0.446834	0.428122	0.440097	0.423289	460
0.399958	0.403983	0.431365	0.454767	0.43761	0.44854	0.42937	462
0.401667	0.406391	0.437016	0.462566	0.447423	0.457643	0.435451	464
0.405887	0.410264	0.44666	0.472032	0.46031	0.466844	0.443666	466
0.410507	0.413004	0.456848	0.482753	0.476737	0.476215	0.452677	468
0.416466	0.416818	0.467566	0.495422	0.493672	0.488007	0.462992	470
0.424147	0.420386	0.479404	0.509458	0.5096	0.495996	0.473165	472
0.430864	0.427101	0.494175	0.525325	0.530807	0.5097	0.486329	474
0.439009	0.431892	0.512951	0.543917	0.553743	0.521639	0.500525	476
0.447742	0.438422	0.535439	0.566526	0.581652	0.535247	0.517505	478
0.459694	0.444555	0.558711	0.59257	0.614457	0.550712	0.536783	480
0.473371	0.450764	0.584568	0.623386	0.649941	0.565992	0.558004	482
0.484601	0.457813	0.610311	0.654765	0.68188	0.578383	0.577959	484
0.495624	0.463687	0.633584	0.688885	0.717503	0.594259	0.598924	486
0.508355	0.471003	0.658014	0.728906	0.753938	0.60864	0.621476	488
0.522138	0.478531	0.682783	0.773664	0.790541	0.624055	0.645286	490
0.535771	0.485679	0.707692	0.824842	0.829408	0.640057	0.670575	492
0.548505	0.495638	0.736377	0.880424	0.876563	0.658701	0.699368	494
0.559782	0.504095	0.766895	0.937953	0.924107	0.6762	0.728172	496
0.569582	0.511654	0.803672	0.984805	0.969948	0.6913	0.75516	498
0.582127	0.521657	0.847831	1.02077	1.01093	0.709272	0.782097	500
0.595601	0.530562	0.881804	1.04338	1.04472	0.726585	0.803774	502
0.607296	0.538204	0.899962	1.05977	1.07241	0.743327	0.820161	504
0.621556	0.546533	0.912285	1.07444	1.10303	0.764309	0.837026	506
0.635106	0.554099	0.92506	1.09133	1.13276	0.783866	0.853705	508
0.649132	0.559693	0.933336	1.10315	1.15544	0.800569	0.866887	510
0.669636	0.56777	0.94738	1.11897	1.17676	0.8147	0.882537	512
0.694076	0.575273	0.96182	1.13575	1.20261	0.831462	0.900166	514
0.718848	0.582686	0.97416	1.14896	1.22005	0.842494	0.914532	516
0.744865	0.588725	0.983595	1.15493	1.22939	0.851677	0.92553	518
0.765762	0.594007	0.993819	1.16916	1.24684	0.859924	0.938252	520
0.78133	0.598088	1.00052	1.18114	1.25701	0.868193	0.947713	522
0.791758	0.599214	1.00536	1.19277	1.26728	0.874885	0.955211	524
0.802181	0.60544	1.01605	1.20026	1.27555	0.881237	0.963453	526
0.807888	0.609928	1.02133	1.20537	1.28224	0.885362	0.968686	528
0.81659	0.613436	1.02371	1.20879	1.29016	0.889395	0.973679	530
0.827794	0.62054	1.03138	1.22153	1.30277	0.897144	0.983525	532
0.836261	0.626962	1.03905	1.2346	1.31421	0.905254	0.992723	534
0.84193	0.631005	1.04127	1.23456	1.31571	0.907772	0.995373	536
0.853788	0.636364	1.05167	1.24776	1.33171	0.918112	1.00657	538
0.862295	0.640231	1.05524	1.25895	1.33879	0.923744	1.01321	540
0.870092	0.644826	1.05741	1.26787	1.34531	0.926874	1.01873	542
0.88075	0.650451	1.06629	1.28271	1.35653	0.936379	1.02885	544
0.889335	0.654422	1.06959	1.29348	1.36293	0.942041	1.0353	546
0.90155	0.658634	1.07413	1.29778	1.37132	0.950307	1.04229	548
0.915331	0.662197	1.08022	1.30657	1.37978	0.95719	1.05022	550
0.932946	0.669259	1.08672	1.3186	1.39452	0.97045	1.06208	552
0.941914	0.675867	1.08964	1.31945	1.39915	0.976208	1.06704	554
0.954205	0.68006	1.09585	1.32806	1.41135	0.982127	1.07527	556
0.964166	0.684904	1.10347	1.33173	1.42032	0.988816	1.08223	558
0.969441	0.690567	1.10687	1.33863	1.42616	0.992898	1.08743	560
0.978528	0.691472	1.10902	1.34639	1.43188	0.997176	1.09241	562
0.98478	0.696772	1.11692	1.35653	1.44042	1.00413	1.09993	564
0.991834	0.700915	1.12068	1.35881	1.438	1.00381	1.10234	566
0.998999	0.705319	1.12537	1.36188	1.44475	1.00651	1.10714	568
1.00359	0.708542	1.12751	1.36602	1.44472	1.00557	1.10933	570
1.00864	0.711306	1.13105	1.37145	1.4458	1.00581	1.11234	572
1.00913	0.713937	1.13126	1.36625	1.44626	1.00251	1.11156	574
1.01994	0.716925	1.13987	1.37267	1.4551	1.00837	1.11881	576
1.02201	0.720221	1.14111	1.37599	1.4577	1.00676	1.12063	578
1.02762	0.721836	1.14476	1.38062	1.45792	1.0054	1.12303	580
1.03061	0.724677	1.14853	1.38574	1.46309	1.00722	1.12664	582
1.03016	0.7252	1.14915	1.38704	1.4621	1.0086	1.12704	584
1.03326	0.730021	1.15051	1.39213	1.46511	1.0089	1.12999	586
1.03658	0.733416	1.15402	1.3958	1.46826	1.01673	1.13413	588
1.04344	0.737309	1.15755	1.39968	1.47313	1.0188	1.13832	590
1.04942	0.741364	1.16352	1.40513	1.47831	1.02243	1.14336	592
1.05933	0.746882	1.17043	1.41601	1.48267	1.02725	1.15043	594
1.06678	0.752689	1.17964	1.42858	1.49328	1.03324	1.15903	596
1.0704	0.755604	1.18115	1.43473	1.49245	1.03628	1.16177	598
1.07864	0.761712	1.18567	1.44251	1.49312	1.03967	1.16689	600
1.08858	0.765012	1.18982	1.44664	1.50043	1.04511	1.1726	602
1.09349	0.764406	1.19286	1.44453	1.49556	1.04405	1.17248	604
1.10504	0.769614	1.20007	1.45325	1.50387	1.04802	1.17998	606
1.10993	0.769607	1.19903	1.45612	1.50398	1.04879	1.18124	608
1.11111	0.771957	1.20064	1.45553	1.5019	1.04668	1.1813	610
1.11974	0.774802	1.20465	1.46044	1.50982	1.04986	1.18655	612
1.12378	0.777032	1.20726	1.4609	1.50815	1.04801	1.18752	614
1.12827	0.779173	1.20698	1.46395	1.5082	1.04352	1.18835	616
1.13368	0.7837	1.21207	1.46486	1.51064	1.04534	1.19172	618
1.13836	0.790215	1.21495	1.4726	1.51615	1.0448	1.19618	620
1.14181	0.796646	1.22287	1.47724	1.51631	1.04374	1.19977	622
1.14129	0.799624	1.22485	1.47657	1.51423	1.04161	1.1997	624
1.14697	0.804885	1.22926	1.48529	1.52192	1.04578	1.20568	626
1.15128	0.805669	1.23038	1.48476	1.51786	1.0434	1.20556	628
1.15222	0.808794	1.23116	1.48809	1.51947	1.04301	1.20713	630
1.1585	0.812309	1.23465	1.49148	1.52259	1.04444	1.21066	632
1.16294	0.816435	1.23927	1.49712	1.52671	1.05051	1.2155	634
1.16693	0.819973	1.24352	1.49738	1.52794	1.04878	1.21742	636
1.17428	0.825646	1.25117	1.49951	1.53061	1.0521	1.22222	638
1.17866	0.82586	1.25494	1.50231	1.53386	1.05436	1.225	640
1.18676	0.831094	1.25937	1.50816	1.54165	1.06008	1.23119	642
1.18882	0.837615	1.26864	1.51085	1.54712	1.06488	1.23632	644
1.19678	0.843055	1.27199	1.51566	1.55243	1.0683	1.24137	646
1.19586	0.84195	1.27039	1.51806	1.55106	1.0662	1.24059	648
1.19897	0.843836	1.26946	1.51918	1.55	1.0673	1.24146	650

## Sheet: Fig 1 - SI3C
Figure 1 - figure supplement 3 C) HEK293 cells transiently transfected with hTRPML3, stimulated with TPC2-A1-N and ML-SA1												Figure 1 - figure supplement 3 C) HEK293 cells transiently transfected with hTRPML2, stimulated with TPC2-A1-N and ML2-SA1
cell1	cell2	cell3	cell4	mean	time [s]							cell1	cell2	cell3	cell4	mean	time [s]
0.484884	0.477586	0.474294	0.435036	0.46795	2							0.339969	0.433937	0.650249	0.425687	0.462461	2
0.485727	0.477301	0.473051	0.435009	0.467772	4							0.339165	0.435012	0.659637	0.425118	0.464733	4
0.48409	0.476296	0.472228	0.433784	0.4666	6							0.339935	0.439914	0.661337	0.42426	0.466361	6
0.484018	0.476783	0.471824	0.434423	0.466762	8							0.339694	0.437615	0.65882	0.424983	0.465278	8
0.481433	0.474041	0.471017	0.433977	0.465117	10							0.340669	0.438038	0.657581	0.426613	0.465725	10
0.481102	0.471306	0.469315	0.433296	0.463755	12							0.340348	0.439703	0.651504	0.426959	0.464629	12
0.479981	0.470975	0.468979	0.431886	0.462955	14							0.3403	0.440899	0.653541	0.428976	0.465929	14
0.47937	0.471519	0.469721	0.432942	0.463388	16							0.340067	0.439075	0.651291	0.428984	0.464854	16
0.47869	0.47296	0.470397	0.437428	0.464869	18							0.340454	0.438475	0.658297	0.430525	0.466938	18
0.478544	0.473603	0.470355	0.434803	0.464326	20							0.340372	0.438163	0.656762	0.431994	0.466823	20
0.479671	0.4744	0.469894	0.432223	0.464047	22							0.340195	0.439163	0.660861	0.43195	0.468042	22
0.477977	0.473565	0.467884	0.43277	0.463049	24							0.339634	0.438722	0.664171	0.431625	0.468538	24
0.47834	0.475842	0.467206	0.43211	0.463375	26							0.339037	0.436142	0.667767	0.431252	0.46855	26
0.478468	0.47652	0.466871	0.431068	0.463232	28							0.339719	0.437342	0.668671	0.430275	0.469001	28
0.478068	0.477033	0.465044	0.430253	0.462599	30							0.339376	0.438471	0.667525	0.432281	0.469413	30
0.480484	0.477548	0.464379	0.431245	0.463414	32							0.33924	0.436979	0.655705	0.430662	0.465646	32
0.480072	0.475681	0.463039	0.432678	0.462868	34							0.338567	0.435532	0.648438	0.430257	0.463199	34
0.479802	0.473753	0.461591	0.432067	0.461803	36							0.337871	0.43463	0.648208	0.429077	0.462447	36
0.479494	0.472569	0.461541	0.432515	0.46153	38							0.337254	0.432948	0.647695	0.42734	0.461309	38
0.479468	0.472125	0.461221	0.432737	0.461388	40							0.338069	0.432499	0.647749	0.428939	0.461814	40
0.480151	0.473287	0.460712	0.432264	0.461604	42							0.337239	0.431469	0.650598	0.427058	0.461591	42
0.480911	0.476009	0.461056	0.431318	0.462323	44							0.338225	0.431355	0.653514	0.427771	0.462716	44
0.48025	0.476589	0.461822	0.43098	0.46241	46							0.338997	0.430259	0.649569	0.428423	0.461812	46
0.481623	0.475519	0.461633	0.430685	0.462365	48							0.338336	0.427017	0.65403	0.426834	0.461554	48
0.481804	0.475114	0.461661	0.431041	0.462405	50	addition of TPC2-A1-N						0.339709	0.428543	0.654063	0.427978	0.462573	50	addition of TPC2-A1-N
0.482335	0.475087	0.460694	0.431588	0.462426	52							0.339773	0.429454	0.644608	0.428104	0.460485	52
0.481797	0.47535	0.460454	0.431245	0.462211	54							0.340306	0.428143	0.646778	0.428341	0.460892	54
0.480665	0.475644	0.459399	0.430184	0.461473	56							0.340033	0.427346	0.678596	0.432111	0.469521	56
0.480811	0.475192	0.459688	0.429084	0.461194	58							0.340338	0.431413	0.690161	0.435056	0.474242	58
0.480239	0.475603	0.459286	0.428853	0.460995	60							0.339247	0.431402	0.69564	0.4366	0.475722	60
0.479764	0.477055	0.459946	0.427435	0.46105	62							0.33856	0.42813	0.692631	0.442488	0.475452	62
0.479078	0.475384	0.459498	0.426808	0.460192	64							0.338265	0.425576	0.695478	0.444441	0.47594	64
0.480435	0.475987	0.46087	0.426204	0.460874	66							0.338057	0.424352	0.712061	0.439967	0.47861	66
0.478814	0.477057	0.460835	0.425549	0.460564	68							0.338227	0.423607	0.730703	0.436049	0.482147	68
0.480393	0.479387	0.462132	0.425448	0.46184	70							0.338312	0.421882	0.7627	0.432032	0.488732	70
0.480372	0.4812	0.462802	0.424949	0.462331	72							0.337729	0.419676	0.768936	0.428443	0.488696	72
0.481167	0.481169	0.463044	0.425247	0.462657	74							0.337055	0.415913	0.773862	0.424095	0.487731	74
0.482306	0.483401	0.464342	0.425363	0.463853	76							0.336541	0.411435	0.769497	0.42152	0.484748	76
0.482777	0.484757	0.464463	0.424011	0.464002	78							0.336629	0.410678	0.759018	0.421268	0.481898	78
0.48345	0.486717	0.466548	0.424099	0.465204	80							0.336113	0.407529	0.741192	0.41913	0.475991	80
0.484195	0.490194	0.467199	0.424779	0.466592	82							0.335792	0.405681	0.719284	0.418012	0.469692	82
0.483575	0.490863	0.466025	0.424448	0.466228	84							0.335553	0.403401	0.692836	0.41713	0.46223	84
0.483984	0.491136	0.467642	0.422656	0.466354	86							0.334409	0.400989	0.671814	0.417312	0.456131	86
0.483841	0.491099	0.467791	0.42184	0.466143	88							0.333705	0.399516	0.662388	0.415088	0.452674	88
0.485332	0.491704	0.466794	0.422399	0.466557	90							0.333838	0.39715	0.658448	0.413515	0.450738	90
0.487294	0.493063	0.468712	0.422911	0.467995	92							0.333519	0.395749	0.650429	0.412892	0.448147	92
0.486018	0.492843	0.468404	0.422066	0.467333	94							0.332736	0.394958	0.65164	0.411201	0.447633	94
0.485075	0.493972	0.468432	0.419825	0.466826	96							0.332125	0.392972	0.630647	0.408134	0.440969	96
0.484299	0.496019	0.469843	0.420725	0.467722	98							0.332342	0.391217	0.616125	0.40776	0.436861	98
0.485882	0.497171	0.470155	0.42062	0.468457	100							0.332135	0.388881	0.604474	0.40852	0.433502	100
0.485901	0.498545	0.469647	0.420351	0.468611	102							0.331976	0.387089	0.61136	0.408059	0.434621	102
0.484144	0.498887	0.469938	0.418395	0.467841	104							0.332202	0.385821	0.607177	0.407666	0.433216	104
0.483694	0.495921	0.469123	0.418861	0.4669	106							0.331624	0.385294	0.597682	0.406687	0.430322	106
0.483388	0.496276	0.469861	0.417757	0.466821	108							0.331591	0.386318	0.584973	0.408671	0.427888	108
0.484365	0.495301	0.467713	0.416405	0.465946	110							0.332098	0.385696	0.579017	0.407228	0.42601	110
0.484979	0.495448	0.465184	0.415707	0.46533	112							0.331794	0.386408	0.580747	0.4083	0.426812	112
0.48465	0.496145	0.464926	0.415594	0.465328	114							0.33146	0.390375	0.577322	0.407822	0.426745	114
0.485672	0.496424	0.465111	0.415114	0.46558	116							0.331722	0.395502	0.572234	0.408227	0.426921	116
0.48351	0.496597	0.465208	0.414465	0.464945	118							0.332348	0.394249	0.57676	0.407735	0.427773	118
0.484936	0.494552	0.464496	0.414772	0.464689	120							0.331808	0.396607	0.577283	0.406568	0.428067	120
0.485858	0.495502	0.463628	0.41326	0.464562	122							0.332449	0.395641	0.561964	0.406572	0.424157	122
0.484351	0.494786	0.462989	0.413345	0.463868	124							0.333022	0.395166	0.563327	0.404831	0.424086	124
0.485631	0.494524	0.46193	0.413349	0.463859	126							0.332962	0.394779	0.544325	0.403099	0.418791	126
0.486034	0.493981	0.461131	0.41359	0.463684	128							0.332535	0.394277	0.528841	0.401403	0.414264	128
0.487295	0.493168	0.461039	0.413133	0.463659	130							0.333268	0.39106	0.516889	0.399953	0.410292	130
0.48639	0.493375	0.461138	0.412523	0.463357	132							0.333311	0.390465	0.512337	0.398361	0.408619	132
0.484352	0.492337	0.459942	0.412114	0.462186	134							0.333439	0.390297	0.508059	0.398457	0.407563	134
0.483662	0.49443	0.459849	0.412105	0.462511	136							0.334013	0.389704	0.500504	0.398631	0.405713	136
0.481474	0.494456	0.457516	0.411062	0.461127	138							0.334219	0.388643	0.492154	0.398429	0.403361	138
0.481381	0.496609	0.456791	0.412604	0.461846	140							0.335363	0.388637	0.490946	0.398829	0.403444	140
0.483609	0.498365	0.457543	0.413619	0.463284	142							0.335683	0.389758	0.493777	0.40001	0.404807	142
0.482406	0.498028	0.457021	0.413257	0.462678	144							0.336762	0.390546	0.489461	0.400551	0.40433	144
0.480692	0.496531	0.454674	0.413575	0.461368	146							0.337242	0.395393	0.491991	0.400616	0.40631	146
0.482082	0.495951	0.454135	0.415051	0.461805	148							0.337978	0.395693	0.487086	0.400967	0.405431	148
0.484629	0.498266	0.453525	0.415962	0.463095	150							0.340039	0.396736	0.485642	0.402093	0.406127	150
0.485477	0.497295	0.453304	0.415868	0.462986	152							0.339999	0.395249	0.486286	0.400797	0.405583	152
0.482719	0.497408	0.451206	0.414026	0.46134	154							0.341375	0.396831	0.490078	0.400819	0.407276	154
0.480092	0.495693	0.451752	0.413242	0.460195	156							0.341293	0.397662	0.490412	0.400282	0.407412	156
0.477814	0.495704	0.450978	0.411248	0.458936	158							0.342504	0.398419	0.487432	0.400775	0.407283	158
0.478749	0.495747	0.451656	0.41045	0.45915	160							0.343997	0.399322	0.487036	0.402234	0.408147	160
0.477727	0.495367	0.459539	0.408839	0.460368	162							0.345149	0.399834	0.489624	0.402941	0.409387	162
0.478137	0.499526	0.464402	0.409809	0.462968	164							0.345741	0.399482	0.48732	0.403751	0.409074	164
0.477268	0.498115	0.467171	0.41069	0.463311	166							0.346231	0.398555	0.480549	0.403897	0.407308	166
0.476818	0.499304	0.469693	0.411227	0.46426	168							0.34744	0.399115	0.477615	0.404619	0.407198	168
0.477028	0.501805	0.472205	0.413404	0.46611	170							0.348092	0.402365	0.485369	0.404186	0.410003	170
0.478415	0.505138	0.472924	0.413697	0.467543	172							0.348348	0.402989	0.477262	0.404358	0.408239	172
0.47682	0.504354	0.473605	0.414143	0.467231	174							0.348606	0.404699	0.470644	0.404866	0.407204	174
0.477778	0.503742	0.47255	0.416517	0.467647	176							0.349749	0.406674	0.470092	0.405341	0.407964	176
0.477302	0.501688	0.472526	0.417222	0.467185	178							0.350696	0.407979	0.474055	0.40644	0.409792	178
0.476199	0.500547	0.472394	0.417941	0.46677	180							0.350862	0.408632	0.474179	0.407133	0.410201	180
0.475327	0.50136	0.472646	0.419116	0.467112	182							0.351324	0.408615	0.476084	0.409613	0.411409	182
0.476131	0.502707	0.472878	0.417721	0.467359	184							0.352343	0.420301	0.467414	0.409692	0.412438	184
0.475882	0.502912	0.472196	0.416513	0.466876	186							0.353567	0.423404	0.460827	0.411277	0.412269	186
0.475614	0.50272	0.473203	0.417179	0.467179	188							0.355035	0.422523	0.461733	0.410019	0.412328	188
0.475486	0.504039	0.474245	0.419881	0.468413	190							0.356347	0.420927	0.458519	0.412092	0.411971	190
0.476188	0.504749	0.475345	0.4208	0.46927	192							0.355427	0.420726	0.45719	0.410874	0.411054	192
0.475306	0.502386	0.474222	0.419092	0.467751	194							0.357269	0.420846	0.457699	0.415672	0.412872	194
0.474059	0.501395	0.474695	0.418913	0.467265	196							0.357334	0.421572	0.464824	0.41588	0.414903	196
0.473159	0.502043	0.47622	0.418848	0.467567	198							0.358238	0.422157	0.462024	0.41741	0.414957	198
0.47273	0.500929	0.478068	0.41978	0.467877	200							0.358773	0.420718	0.458659	0.416317	0.413617	200
0.473003	0.499965	0.478475	0.419414	0.467714	202							0.359643	0.422076	0.460886	0.415859	0.414616	202
0.474606	0.499726	0.477678	0.419126	0.467784	204							0.360592	0.422961	0.459287	0.415189	0.414507	204
0.473044	0.501109	0.475478	0.420648	0.46757	206							0.36146	0.426704	0.465057	0.415812	0.417258	206
0.473121	0.50395	0.475754	0.420904	0.468432	208							0.362176	0.428232	0.459501	0.416201	0.416527	208
0.470467	0.502492	0.474086	0.421486	0.467133	210							0.362278	0.426202	0.453656	0.415331	0.414367	210
0.470704	0.503634	0.473866	0.421527	0.467433	212							0.362525	0.426676	0.455523	0.417046	0.415443	212
0.46995	0.509806	0.473011	0.422036	0.468701	214							0.363306	0.426213	0.452866	0.417545	0.414983	214
0.470009	0.510786	0.472742	0.421385	0.468731	216							0.364896	0.425013	0.4494	0.417191	0.414125	216
0.469247	0.512316	0.47321	0.422553	0.469332	218							0.36559	0.425061	0.449842	0.417648	0.414535	218
0.469166	0.510034	0.470502	0.421858	0.46789	220							0.367566	0.425859	0.444764	0.418998	0.414297	220
0.468491	0.51187	0.469764	0.421878	0.468001	222							0.368154	0.426665	0.44197	0.418831	0.413905	222
0.46853	0.511867	0.469742	0.420613	0.467688	224							0.369603	0.426963	0.442707	0.419536	0.414702	224
0.468427	0.514578	0.46912	0.420971	0.468274	226							0.370008	0.426502	0.441783	0.420881	0.414793	226
0.467836	0.513589	0.468297	0.419821	0.467386	228							0.370002	0.426151	0.442687	0.421936	0.415194	228
0.469413	0.514349	0.46827	0.420256	0.468072	230							0.370483	0.425994	0.443364	0.421199	0.41526	230
0.469726	0.515791	0.470132	0.419859	0.468877	232							0.371471	0.427763	0.447128	0.422285	0.417162	232
0.470204	0.517078	0.470815	0.42021	0.469577	234							0.371898	0.428821	0.447082	0.4228	0.41765	234
0.469204	0.517454	0.470131	0.420897	0.469422	236							0.372266	0.428721	0.444144	0.422988	0.41703	236
0.468822	0.518276	0.47021	0.420585	0.469473	238							0.372282	0.429261	0.441014	0.423021	0.416394	238
0.469002	0.520481	0.469733	0.420281	0.469874	240							0.372906	0.429643	0.440144	0.422052	0.416186	240
0.467355	0.520861	0.471573	0.421578	0.470341	242							0.373376	0.430067	0.44215	0.422196	0.416947	242
0.466441	0.521066	0.472592	0.419671	0.469943	244							0.375141	0.431219	0.440976	0.422848	0.417546	244
0.466887	0.523463	0.473308	0.421529	0.471297	246							0.375123	0.432466	0.44557	0.422774	0.418983	246
0.464556	0.524282	0.473036	0.421619	0.470873	248							0.376592	0.434017	0.44235	0.42403	0.419247	248
0.462899	0.526224	0.47154	0.421954	0.470654	250							0.375583	0.432677	0.439897	0.423871	0.418007	250
0.463721	0.526718	0.470503	0.423153	0.471024	252							0.375841	0.432874	0.443154	0.424401	0.419067	252
0.462914	0.522678	0.468226	0.425534	0.469838	254							0.376112	0.433092	0.447663	0.424535	0.42035	254
0.463819	0.522862	0.46743	0.426114	0.470056	256							0.37639	0.433249	0.443599	0.42366	0.419225	256
0.464288	0.523604	0.466631	0.426539	0.470266	258							0.376576	0.434114	0.442608	0.423177	0.419119	258
0.463581	0.52202	0.466166	0.427272	0.46976	260							0.378438	0.434921	0.43966	0.424069	0.419272	260
0.463648	0.522816	0.465482	0.429222	0.470292	262							0.378227	0.435177	0.443221	0.423832	0.420114	262
0.464286	0.526864	0.464445	0.430626	0.471555	264							0.378919	0.436243	0.443917	0.423471	0.420637	264
0.465244	0.527102	0.463584	0.430102	0.471508	266							0.379217	0.436836	0.444101	0.424857	0.421253	266
0.465202	0.528027	0.46454	0.430697	0.472116	268							0.381208	0.437685	0.443318	0.427645	0.422464	268
0.467319	0.528188	0.465803	0.432066	0.473344	270							0.379864	0.437078	0.442343	0.426375	0.421415	270
0.465012	0.526197	0.465743	0.431629	0.472145	272							0.381412	0.439281	0.440294	0.427543	0.422132	272
0.464956	0.527574	0.466457	0.431248	0.472559	274							0.381598	0.438615	0.436345	0.426317	0.420719	274
0.464408	0.527531	0.467279	0.430107	0.472331	276							0.38185	0.440721	0.437033	0.425821	0.421356	276
0.464608	0.530054	0.46969	0.431015	0.473842	278							0.383446	0.441396	0.436082	0.424935	0.421465	278
0.464656	0.532775	0.471041	0.430011	0.474621	280							0.384231	0.441573	0.434894	0.423769	0.421117	280
0.465288	0.533542	0.470791	0.429779	0.47485	282							0.383681	0.441955	0.435421	0.424252	0.421327	282
0.466117	0.535046	0.470444	0.428603	0.475052	284							0.385205	0.441957	0.441464	0.424202	0.423207	284
0.464158	0.537864	0.471565	0.428346	0.475483	286							0.386463	0.442612	0.443347	0.424784	0.424301	286
0.463283	0.537587	0.472919	0.427188	0.475244	288							0.386003	0.443444	0.439262	0.423627	0.423084	288
0.464411	0.535336	0.472417	0.426847	0.474752	290							0.387015	0.444544	0.436478	0.425178	0.423304	290
0.463583	0.535846	0.472022	0.427193	0.474661	292							0.387633	0.444974	0.43384	0.42441	0.422714	292
0.463826	0.536241	0.471415	0.42745	0.474733	294							0.388625	0.447053	0.437674	0.42426	0.424403	294
0.463427	0.534262	0.470314	0.427359	0.47384	296							0.389118	0.448556	0.435668	0.42472	0.424515	296
0.461949	0.533502	0.470254	0.428237	0.473485	298							0.389922	0.448384	0.434593	0.425971	0.424718	298
0.46148	0.531966	0.469355	0.429394	0.473049	300							0.38986	0.447797	0.432846	0.426081	0.424146	300
0.461824	0.532255	0.468798	0.429396	0.473068	302							0.390132	0.448078	0.431802	0.425954	0.423991	302
0.461237	0.529254	0.467969	0.431508	0.472492	304							0.391246	0.447332	0.431479	0.425304	0.42384	304
0.460892	0.528847	0.468382	0.430732	0.472213	306							0.390866	0.449012	0.430174	0.424899	0.423738	306
0.460485	0.528963	0.468671	0.430661	0.472195	308							0.390646	0.448926	0.428473	0.425007	0.423263	308
0.459671	0.526697	0.468519	0.431583	0.471617	310							0.391445	0.454719	0.42672	0.424737	0.424405	310
0.45951	0.526935	0.468623	0.432196	0.471816	312							0.391251	0.461971	0.426722	0.426031	0.426494	312
0.458441	0.525477	0.467937	0.431885	0.470935	314							0.392359	0.46348	0.426295	0.428071	0.427551	314
0.458586	0.526641	0.468752	0.43311	0.471772	316							0.391725	0.500967	0.430659	0.428271	0.437905	316
0.460667	0.529528	0.468553	0.433818	0.473141	318							0.392393	0.516742	0.433954	0.428964	0.443013	318
0.460769	0.529209	0.466783	0.434904	0.472916	320							0.3934	0.502131	0.432007	0.428868	0.439102	320
0.462381	0.527841	0.466703	0.435603	0.473132	322							0.39384	0.493452	0.432423	0.429371	0.437272	322
0.462073	0.526434	0.468182	0.435286	0.472994	324							0.394824	0.48494	0.434865	0.430428	0.436264	324
0.462778	0.526413	0.467651	0.435097	0.472985	326							0.39528	0.480101	0.436553	0.432074	0.436002	326
0.463678	0.525145	0.467073	0.432536	0.472108	328							0.39737	0.478478	0.434702	0.431462	0.435503	328
0.462971	0.52379	0.467197	0.433044	0.471751	330							0.396219	0.47546	0.433976	0.431521	0.434294	330
0.464049	0.524492	0.467604	0.433331	0.472369	332							0.396945	0.473236	0.437976	0.433626	0.435446	332
0.463967	0.524333	0.470719	0.431698	0.47268	334							0.397472	0.477398	0.43922	0.435049	0.437285	334
0.462802	0.525242	0.471453	0.430774	0.472568	336							0.397533	0.475005	0.440243	0.435112	0.436973	336
0.462396	0.527254	0.472652	0.432133	0.473609	338							0.397576	0.472999	0.445373	0.435648	0.437899	338
0.462064	0.529652	0.47243	0.432055	0.47405	340							0.397508	0.471512	0.448905	0.435028	0.438238	340
0.463378	0.534324	0.473918	0.431559	0.475795	342							0.397348	0.470083	0.447267	0.434905	0.437401	342
0.463257	0.536223	0.473538	0.431466	0.476121	344							0.397331	0.468192	0.450179	0.43421	0.437478	344
0.462254	0.535548	0.471407	0.430275	0.474871	346							0.396829	0.467287	0.448732	0.433807	0.436664	346
0.46274	0.535566	0.470152	0.432514	0.475243	348							0.397882	0.467909	0.44271	0.434078	0.435645	348
0.463405	0.534143	0.47018	0.433165	0.475223	350							0.398221	0.468176	0.441041	0.434282	0.43543	350
0.463804	0.533848	0.471752	0.435602	0.476251	352							0.400263	0.467891	0.445479	0.434385	0.437004	352
0.464871	0.532305	0.470018	0.433717	0.475228	354							0.400753	0.468433	0.448362	0.432738	0.437571	354
0.466668	0.530963	0.471129	0.433136	0.475474	356							0.400527	0.46722	0.446769	0.434661	0.437294	356
0.466608	0.531529	0.472537	0.432795	0.475867	358							0.401197	0.468525	0.445046	0.435913	0.43767	358
0.465589	0.529366	0.471386	0.432204	0.474636	360							0.401837	0.469771	0.446041	0.436778	0.438607	360
0.466273	0.530355	0.473434	0.433469	0.475883	362							0.401704	0.469928	0.440698	0.436917	0.437312	362
0.46702	0.532024	0.474406	0.435254	0.477176	364							0.403299	0.470537	0.441803	0.438031	0.438417	364
0.466387	0.532827	0.474224	0.435023	0.477115	366							0.403232	0.469642	0.451657	0.436818	0.440337	366
0.466674	0.532001	0.4734	0.435191	0.476817	368							0.404075	0.469459	0.451375	0.435396	0.440076	368
0.466937	0.530456	0.473544	0.43459	0.476382	370							0.404892	0.470901	0.448775	0.435984	0.440138	370
0.466095	0.530085	0.47211	0.43709	0.476345	372							0.405391	0.471083	0.452946	0.436137	0.441389	372
0.467778	0.529516	0.471365	0.436963	0.476406	374							0.405152	0.473864	0.455547	0.435933	0.442624	374
0.465751	0.531196	0.47071	0.436157	0.475953	376							0.40655	0.474526	0.457343	0.437931	0.444088	376
0.467418	0.533697	0.471777	0.436227	0.47728	378							0.406233	0.477569	0.448985	0.437639	0.442606	378
0.467409	0.533967	0.472177	0.436049	0.477401	380							0.408882	0.477873	0.446347	0.438612	0.442928	380
0.46839	0.533446	0.473109	0.434807	0.477438	382							0.408486	0.475584	0.444708	0.437589	0.441592	382
0.468446	0.536288	0.472318	0.436134	0.478296	384							0.409775	0.475553	0.442577	0.437469	0.441343	384
0.467957	0.53689	0.471783	0.435869	0.478125	386							0.410213	0.474925	0.440404	0.438839	0.441095	386
0.468573	0.536896	0.472498	0.437056	0.478756	388							0.408755	0.473818	0.438462	0.437822	0.439714	388
0.468616	0.537546	0.47565	0.436977	0.479697	390							0.409286	0.475127	0.438533	0.437455	0.4401	390
0.470127	0.537659	0.476069	0.436858	0.480178	392							0.408941	0.476676	0.43749	0.43815	0.440314	392
0.470384	0.538254	0.477858	0.436264	0.48069	394							0.410688	0.479153	0.437368	0.439461	0.441668	394
0.470844	0.536947	0.478269	0.435847	0.480477	396							0.409933	0.477507	0.434429	0.438162	0.440008	396
0.470188	0.537491	0.478634	0.435472	0.480446	398							0.410521	0.477948	0.434546	0.440366	0.440845	398
0.471018	0.539779	0.478209	0.437354	0.48159	400							0.410479	0.476141	0.434532	0.441301	0.440613	400
0.468339	0.534734	0.475327	0.436171	0.478643	402							0.411534	0.475724	0.434478	0.441734	0.440868	402
0.469582	0.53537	0.47792	0.438625	0.480374	404							0.413687	0.477198	0.434162	0.442486	0.441883	404
0.470281	0.533821	0.475568	0.438373	0.479511	406							0.413106	0.483753	0.434275	0.44427	0.443851	406
0.469518	0.533851	0.475624	0.43884	0.479458	408							0.412561	0.480442	0.432497	0.442855	0.442089	408
0.470685	0.53336	0.475106	0.438827	0.479495	410							0.412221	0.479121	0.430653	0.44206	0.441014	410
0.471207	0.533798	0.474838	0.439269	0.479778	412							0.414245	0.480115	0.432177	0.444688	0.442806	412
0.470918	0.533573	0.47596	0.440732	0.480296	414							0.413699	0.479561	0.431996	0.447026	0.44307	414
0.471911	0.536689	0.476467	0.445471	0.482634	416							0.414482	0.478717	0.432865	0.447757	0.443455	416
0.472445	0.537088	0.475167	0.445993	0.482673	418							0.414036	0.477606	0.432986	0.446761	0.442847	418
0.47253	0.533466	0.47453	0.445348	0.481469	420							0.415133	0.476817	0.430674	0.446	0.442156	420
0.472881	0.536383	0.476218	0.444467	0.482487	422							0.415086	0.476838	0.429989	0.445901	0.441953	422
0.474195	0.53752	0.476948	0.443533	0.483049	424							0.416051	0.478187	0.43021	0.448121	0.443142	424
0.47393	0.538533	0.476494	0.443519	0.483119	426							0.418031	0.478557	0.43153	0.451778	0.444974	426
0.474603	0.540109	0.477629	0.442355	0.483674	428							0.419071	0.480084	0.430235	0.455113	0.446125	428
0.475575	0.538909	0.4761	0.442932	0.483379	430							0.418097	0.480264	0.429256	0.456229	0.445962	430
0.477348	0.539618	0.476362	0.443638	0.484241	432							0.418136	0.479327	0.428804	0.454072	0.445085	432
0.476754	0.541374	0.476586	0.442841	0.484389	434							0.418658	0.47925	0.428286	0.452183	0.444595	434
0.477486	0.541892	0.476365	0.443861	0.484901	436							0.419973	0.480358	0.428449	0.452633	0.445353	436
0.47685	0.541684	0.475016	0.443104	0.484163	438							0.420993	0.485434	0.429461	0.452366	0.447063	438
0.478245	0.542867	0.47574	0.442089	0.484735	440							0.421168	0.485649	0.428478	0.451779	0.446768	440
0.477417	0.543468	0.474211	0.441437	0.484133	442							0.419415	0.484399	0.427543	0.450725	0.44552	442
0.477984	0.544206	0.473234	0.440679	0.484026	444							0.418467	0.482292	0.426795	0.450773	0.444582	444
0.478356	0.543805	0.471809	0.442615	0.484146	446							0.419703	0.482597	0.426244	0.451624	0.445042	446
0.478276	0.544708	0.47091	0.443536	0.484357	448							0.419072	0.482656	0.426353	0.451317	0.44485	448
0.478423	0.54493	0.469051	0.444464	0.484217	450	addition of ML-SA1						0.420279	0.48381	0.426755	0.452753	0.445899	450	addition of ML-SA1
0.478613	0.546611	0.469666	0.446019	0.485227	452							0.419629	0.480991	0.425044	0.451169	0.444208	452
0.581073	0.779456	0.866201	0.519101	0.686458	454							0.440293	0.532777	0.66018	0.506733	0.534996	454
0.61623	0.880658	1.01357	0.603021	0.77837	456							0.509094	0.714467	1.01017	0.68559	0.729831	456
0.659314	0.916534	1.08021	0.687658	0.835928	458							0.575382	0.842286	1.20952	0.854266	0.870364	458
0.714894	0.944987	1.15513	0.784245	0.899814	460							0.635749	0.974984	1.28972	1.09021	0.997667	460
0.76471	0.975642	1.21294	0.926258	0.969889	462							0.695694	1.02896	1.31571	1.223	1.06584	462
0.80941	1.0027	1.22485	0.99019	1.00679	464							0.771069	1.05926	1.33177	1.28288	1.11125	464
0.855485	1.04339	1.23091	1.02623	1.03901	466							0.836569	1.08141	1.34809	1.3147	1.14519	466
0.901442	1.08475	1.23426	1.05187	1.06808	468							0.876988	1.09009	1.35565	1.32912	1.16296	468
0.931903	1.1112	1.23217	1.06785	1.08578	470							0.900764	1.1001	1.36092	1.33705	1.17471	470
0.959922	1.12214	1.23338	1.09277	1.10205	472							0.919013	1.10805	1.36799	1.33667	1.18293	472
0.982729	1.12578	1.23161	1.10601	1.11153	474							0.929597	1.11368	1.36888	1.33136	1.18588	474
1.00371	1.12457	1.22796	1.11117	1.11685	476							0.937285	1.11847	1.37469	1.33299	1.19086	476
1.02696	1.12444	1.22857	1.1181	1.12452	478							0.944473	1.12567	1.38358	1.33765	1.19784	478
1.05082	1.12902	1.23148	1.12318	1.13362	480							0.946673	1.13227	1.39127	1.34072	1.20273	480
1.0795	1.13073	1.23077	1.12911	1.14253	482							0.948928	1.1337	1.39972	1.34094	1.20582	482
1.11118	1.12955	1.23106	1.13431	1.15152	484							0.950725	1.13679	1.40108	1.3434	1.208	484
1.12758	1.13138	1.23177	1.14404	1.15869	486							0.95542	1.14251	1.41037	1.35494	1.21581	486
1.13853	1.13521	1.23387	1.14918	1.1642	488							0.955705	1.14747	1.4196	1.36235	1.22128	488
1.14494	1.13723	1.23902	1.15898	1.17005	490							0.958037	1.15415	1.4245	1.36762	1.22608	490
1.15034	1.14276	1.23896	1.16239	1.17361	492							0.957794	1.15908	1.43158	1.37574	1.23105	492
1.15635	1.15112	1.24203	1.17515	1.18116	494							0.958832	1.162	1.43319	1.38096	1.23375	494
1.1585	1.15927	1.24195	1.18366	1.18585	496							0.961453	1.1665	1.43925	1.39403	1.24031	496
1.16064	1.16376	1.24159	1.1936	1.1899	498							0.964572	1.17028	1.44793	1.40512	1.24697	498
1.16459	1.16785	1.24714	1.20855	1.19703	500							0.967792	1.17635	1.45669	1.41849	1.25483	500
1.16413	1.17481	1.25142	1.22457	1.20373	502							0.969236	1.17795	1.45899	1.42769	1.25847	502
1.16711	1.18558	1.25545	1.23483	1.21074	504							0.970853	1.18307	1.45633	1.44107	1.26283	504
1.17058	1.19458	1.26075	1.24613	1.21801	506							0.973637	1.1873	1.46377	1.45879	1.27087	506
1.17427	1.20421	1.26475	1.26143	1.22616	508							0.977751	1.19036	1.47031	1.47255	1.27774	508
1.17545	1.21297	1.27426	1.27438	1.23427	510							0.985951	1.19709	1.47634	1.49037	1.28744	510
1.17915	1.21478	1.27518	1.29321	1.24058	512							0.993107	1.20298	1.48602	1.50812	1.29755	512
1.17561	1.22103	1.27932	1.29761	1.24339	514							0.999023	1.20577	1.48992	1.5204	1.30378	514
1.17843	1.23192	1.28141	1.30922	1.25025	516							1.00549	1.20874	1.49202	1.53153	1.30944	516
1.17826	1.24177	1.28505	1.31715	1.25556	518							1.01079	1.20959	1.4968	1.54516	1.31559	518
1.18503	1.2511	1.28626	1.33119	1.26339	520							1.0212	1.21409	1.50153	1.55166	1.32212	520
1.19043	1.26226	1.29149	1.34279	1.27174	522							1.02841	1.21716	1.50376	1.56005	1.32735	522
1.19676	1.27346	1.29314	1.35282	1.27904	524							1.03802	1.21903	1.51006	1.56527	1.3331	524
1.2053	1.2897	1.30179	1.37343	1.29255	526							1.04605	1.22338	1.5131	1.57189	1.33861	526
1.20805	1.30276	1.30692	1.38883	1.30164	528							1.05314	1.22233	1.51193	1.57021	1.3394	528
1.21348	1.31009	1.30924	1.39824	1.30776	530							1.06046	1.22678	1.51845	1.57583	1.34538	530
1.21761	1.32172	1.31102	1.40764	1.3145	532							1.0715	1.22994	1.52565	1.58004	1.35178	532
1.21994	1.33284	1.31827	1.41878	1.32246	534							1.08005	1.23457	1.53004	1.58214	1.3567	534
1.23022	1.34352	1.32701	1.43021	1.33274	536							1.0934	1.23712	1.53662	1.58807	1.3638	536
1.23449	1.34916	1.3307	1.43787	1.33805	538							1.1018	1.23803	1.53808	1.59029	1.36705	538
1.24198	1.35589	1.33403	1.44499	1.34422	540							1.11612	1.2455	1.54664	1.59981	1.37701	540
1.24997	1.36108	1.33973	1.45351	1.35107	542							1.12723	1.24698	1.5506	1.60108	1.38147	542
1.25708	1.36859	1.34272	1.46013	1.35713	544							1.13672	1.24887	1.55694	1.60661	1.38728	544
1.26716	1.37605	1.3495	1.47384	1.36664	546							1.14389	1.25419	1.55961	1.61063	1.39208	546
1.27861	1.38351	1.35598	1.48467	1.37569	548							1.14647	1.25376	1.55783	1.60598	1.39101	548
1.2885	1.39429	1.36824	1.49857	1.3874	550							1.15264	1.25214	1.55915	1.6077	1.39291	550
1.29571	1.39792	1.37108	1.50558	1.39257	552							1.15547	1.25523	1.5614	1.61008	1.39555	552
1.3031	1.40575	1.37779	1.51483	1.40037	554							1.16141	1.25834	1.56267	1.61178	1.39855	554
1.31301	1.41548	1.38255	1.52611	1.40929	556							1.16832	1.26332	1.57149	1.61714	1.40507	556
1.32224	1.41817	1.38588	1.52964	1.41398	558							1.17058	1.26377	1.57047	1.61869	1.40588	558
1.32078	1.4166	1.39092	1.53589	1.41605	560							1.17494	1.26497	1.57592	1.62017	1.409	560
1.32922	1.42091	1.39711	1.53984	1.42177	562							1.17885	1.26838	1.57448	1.62227	1.41099	562
1.33441	1.42417	1.39819	1.54148	1.42456	564							1.18493	1.27281	1.57922	1.62633	1.41582	564
1.34859	1.43382	1.40334	1.54825	1.4335	566							1.18805	1.27262	1.58016	1.62816	1.41725	566
1.35068	1.43674	1.40496	1.54259	1.43374	568							1.19051	1.27494	1.58301	1.6329	1.42034	568
1.35824	1.43986	1.4106	1.55158	1.44007	570							1.19255	1.27346	1.5818	1.6255	1.41833	570
1.35844	1.44423	1.42247	1.55533	1.44512	572							1.19674	1.27806	1.58508	1.63427	1.42354	572
1.36858	1.44086	1.42127	1.55996	1.44767	574							1.2009	1.27973	1.58918	1.63831	1.42703	574
1.36975	1.44407	1.42527	1.55885	1.44948	576							1.203	1.27776	1.5844	1.63663	1.42545	576
1.37061	1.44681	1.42885	1.5624	1.45217	578							1.20308	1.27838	1.58766	1.63582	1.42623	578
1.37989	1.45941	1.43563	1.56498	1.45998	580							1.21039	1.28402	1.59394	1.64422	1.43314	580
1.38588	1.45899	1.43855	1.57307	1.46412	582							1.21371	1.28649	1.6028	1.64828	1.43782	582
1.38715	1.45656	1.44248	1.5793	1.46637	584							1.21829	1.28895	1.5979	1.65049	1.43891	584
1.39094	1.44993	1.44565	1.57854	1.46626	586							1.21687	1.28583	1.59824	1.6453	1.43656	586
1.39836	1.45203	1.45249	1.58232	1.4713	588							1.22169	1.29206	1.59879	1.652	1.44113	588
1.40296	1.44924	1.45585	1.58339	1.47286	590							1.22242	1.2936	1.59815	1.65329	1.44186	590
1.40866	1.44558	1.45976	1.58494	1.47474	592							1.2235	1.29247	1.59825	1.64961	1.44096	592
1.41529	1.44853	1.45966	1.5887	1.47804	594							1.22375	1.29159	1.59808	1.65134	1.44119	594
1.41763	1.44986	1.47072	1.59098	1.4823	596							1.22956	1.2977	1.60394	1.65865	1.44746	596
1.41971	1.44566	1.46941	1.59397	1.48219	598							1.23388	1.30136	1.60656	1.66387	1.45142	598
1.42703	1.44718	1.47856	1.6032	1.48899	600							1.23733	1.30183	1.60874	1.66663	1.45363	600
1.42553	1.44309	1.48055	1.60331	1.48812	602							1.23651	1.30202	1.60617	1.6653	1.4525	602
1.42803	1.44788	1.48664	1.60463	1.49179	604							1.23963	1.30396	1.60699	1.66575	1.45408	604
1.42762	1.44399	1.48617	1.60413	1.49048	606							1.24179	1.30672	1.61091	1.66734	1.45669	606
1.42975	1.44348	1.48969	1.60725	1.49254	608							1.24275	1.30584	1.61127	1.66706	1.45673	608
1.43537	1.44308	1.48908	1.60422	1.49294	610							1.24427	1.30579	1.61108	1.66791	1.45726	610
1.43608	1.44346	1.49204	1.60516	1.49418	612							1.24395	1.3054	1.60845	1.67019	1.457	612
1.43445	1.4435	1.49293	1.60787	1.49469	614							1.24819	1.30985	1.61298	1.67066	1.46042	614
1.4314	1.44066	1.49367	1.60809	1.49345	616							1.25284	1.31569	1.61856	1.67689	1.466	616
1.43755	1.44453	1.49834	1.61096	1.49784	618							1.25787	1.31827	1.62263	1.68043	1.4698	618
1.43557	1.43803	1.48966	1.60592	1.49229	620							1.2563	1.31785	1.61709	1.67809	1.46733	620
1.43661	1.44039	1.49692	1.60925	1.49579	622							1.25736	1.31932	1.62046	1.68121	1.46959	622
1.43537	1.43772	1.49929	1.61641	1.4972	624							1.25931	1.31922	1.619	1.68025	1.46945	624
1.43476	1.44846	1.49882	1.61691	1.49974	626							1.26012	1.32145	1.62173	1.68154	1.47121	626
1.44147	1.44673	1.49904	1.62037	1.5019	628							1.263	1.32181	1.62556	1.68399	1.47359	628
1.44042	1.44111	1.50401	1.62928	1.5037	630							1.26094	1.31999	1.61755	1.68102	1.46988	630
1.43838	1.43705	1.51137	1.63587	1.50567	632							1.26052	1.32169	1.62207	1.68019	1.47112	632
1.44257	1.43775	1.51797	1.63551	1.50845	634							1.26238	1.3204	1.62033	1.68127	1.4711	634
1.44237	1.43553	1.51925	1.6398	1.50924	636							1.27146	1.32925	1.6282	1.69056	1.47987	636
1.44294	1.4387	1.52701	1.64486	1.51338	638							1.27406	1.33031	1.6319	1.69147	1.48193	638
1.44353	1.43625	1.524	1.64214	1.51148	640							1.27491	1.33102	1.62129	1.69033	1.47939	640
1.44216	1.43772	1.53088	1.63766	1.51211	642							1.2752	1.33141	1.627	1.69178	1.48134	642
1.45212	1.43758	1.52456	1.63583	1.51252	644							1.2769	1.33229	1.6298	1.694	1.48325	644
1.44803	1.43267	1.52483	1.62754	1.50827	646							1.27999	1.33388	1.62638	1.6915	1.48294	646
1.44464	1.4319	1.52699	1.61981	1.50583	648							1.27761	1.33338	1.6266	1.69349	1.48277	648
1.44415	1.43796	1.52471	1.62285	1.50742	650							1.27974	1.33306	1.62557	1.68993	1.48207	650

## Sheet: Fig 1 - SI3D
Figure 1 - figure supplement 3 D) HEK293 cells transiently transfected with hTRPML3, stimulated with TPC2-A1-P and ML-SA1												Figure 1 - figure supplement 3 D) HEK293 cells transiently transfected with hTRPML2, stimulated with TPC2-A1-P and ML2-SA1
cell1	cell2	cell3	cell4	mean	time [s]							cell1	cell2	cell3	cell4	mean	time [s]
0.424942	0.440608	0.441039	0.426432	0.433255	2							0.337066	0.408315	0.3749	0.345822	0.366526	2
0.423258	0.438946	0.44007	0.424506	0.431695	4							0.336164	0.407904	0.375387	0.346228	0.366421	4
0.422583	0.438273	0.438858	0.423595	0.430827	6							0.336537	0.40696	0.37488	0.345429	0.365951	6
0.42048	0.436559	0.438366	0.422407	0.429453	8							0.336304	0.406411	0.375088	0.344807	0.365652	8
0.419226	0.436106	0.438294	0.42259	0.429054	10							0.336599	0.407425	0.375435	0.344739	0.366049	10
0.420449	0.436716	0.438444	0.422827	0.429609	12							0.336671	0.407109	0.375933	0.346119	0.366458	12
0.41979	0.43753	0.439046	0.42325	0.429904	14							0.336211	0.406712	0.376955	0.345595	0.366368	14
0.418786	0.435678	0.438066	0.422812	0.428836	16							0.336802	0.406513	0.377382	0.345854	0.366638	16
0.417935	0.433788	0.436905	0.420692	0.42733	18							0.336499	0.405944	0.376466	0.344261	0.365793	18
0.418041	0.433602	0.436546	0.419744	0.426983	20							0.337022	0.405866	0.375692	0.343884	0.365616	20
0.419396	0.434826	0.438337	0.421373	0.428483	22							0.336193	0.403714	0.374989	0.341928	0.364206	22
0.420288	0.435326	0.438836	0.422318	0.429192	24							0.336833	0.402854	0.375316	0.341376	0.364095	24
0.419397	0.433604	0.437414	0.420595	0.427753	26							0.335482	0.401	0.375134	0.339786	0.362851	26
0.419704	0.434231	0.438033	0.419909	0.427969	28							0.335345	0.401617	0.376086	0.339162	0.363052	28
0.417697	0.432901	0.437522	0.419428	0.426887	30							0.335516	0.401351	0.375295	0.338326	0.362622	30
0.418894	0.434408	0.438251	0.420505	0.428014	32							0.335021	0.40056	0.375224	0.337425	0.362057	32
0.417357	0.433341	0.437022	0.419411	0.426782	34							0.335067	0.399838	0.374556	0.33634	0.36145	34
0.419716	0.434453	0.437078	0.41991	0.427789	36							0.334882	0.400068	0.374375	0.336272	0.361399	36
0.41806	0.433146	0.436468	0.418571	0.426561	38							0.334457	0.399263	0.373636	0.335345	0.360675	38
0.416832	0.431888	0.435785	0.418184	0.425672	40							0.334365	0.399635	0.374403	0.334885	0.360822	40
0.417622	0.431862	0.435499	0.417925	0.425727	42							0.333864	0.399007	0.374318	0.333844	0.360258	42
0.416955	0.431355	0.434232	0.41717	0.424928	44							0.333687	0.397396	0.373448	0.33274	0.359318	44
0.417187	0.431303	0.434844	0.417093	0.425107	46							0.333798	0.395876	0.372863	0.332373	0.358728	46
0.417693	0.431507	0.434649	0.416994	0.425211	48							0.33439	0.395658	0.373468	0.33206	0.358894	48
0.416594	0.430732	0.434955	0.416772	0.424763	50	addition of TPC2-A1-P						0.334091	0.394887	0.372838	0.331649	0.358366	50	addition of TPC2-A1-P
0.416528	0.429949	0.433566	0.415763	0.423952	52							0.334406	0.394556	0.372918	0.332118	0.358499	52
0.415337	0.429673	0.434062	0.415933	0.423751	54							0.334978	0.394	0.372683	0.330977	0.358159	54
0.411589	0.428937	0.433654	0.41543	0.422403	56							0.335994	0.394182	0.374558	0.33218	0.359229	56
0.407401	0.425645	0.43077	0.412834	0.419162	58							0.335755	0.391949	0.371735	0.331372	0.357702	58
0.405653	0.42324	0.428587	0.411063	0.417136	60							0.334011	0.388601	0.368866	0.32892	0.355099	60
0.403984	0.420649	0.425639	0.40843	0.414676	62							0.332359	0.385287	0.365351	0.327508	0.352626	62
0.401125	0.417752	0.422846	0.405631	0.411838	64							0.331228	0.382985	0.363446	0.325889	0.350887	64
0.400881	0.415003	0.420912	0.403377	0.410043	66							0.329529	0.380931	0.361031	0.324493	0.348996	66
0.399186	0.413048	0.419471	0.401413	0.40828	68							0.327999	0.379563	0.359495	0.323404	0.347615	68
0.399523	0.413533	0.419129	0.401686	0.408468	70							0.326608	0.379128	0.358737	0.322371	0.346711	70
0.399968	0.413115	0.418744	0.401288	0.408279	72							0.324485	0.378887	0.357646	0.320416	0.345359	72
0.400268	0.411951	0.416724	0.400366	0.407327	74							0.323661	0.379189	0.358604	0.320178	0.345408	74
0.400236	0.410808	0.41512	0.3991	0.406316	76							0.322377	0.378552	0.358063	0.31916	0.344538	76
0.399424	0.409654	0.413664	0.397556	0.405074	78							0.321804	0.379506	0.359734	0.319556	0.34515	78
0.398381	0.408352	0.412804	0.396443	0.403995	80							0.320778	0.379765	0.358686	0.318805	0.344508	80
0.397658	0.407709	0.412315	0.395776	0.403365	82							0.320088	0.379717	0.35921	0.318903	0.344479	82
0.397036	0.406747	0.411373	0.39467	0.402457	84							0.318803	0.379896	0.358918	0.318462	0.34402	84
0.397493	0.407232	0.412096	0.395217	0.40301	86							0.318484	0.381101	0.358954	0.318214	0.344188	86
0.398832	0.408344	0.412148	0.395792	0.403779	88							0.317135	0.379802	0.357904	0.317524	0.343091	88
0.399954	0.408898	0.412605	0.395777	0.404308	90							0.316829	0.379554	0.358171	0.316726	0.34282	90
0.401057	0.409459	0.412992	0.396081	0.404897	92							0.315807	0.380628	0.358823	0.317728	0.343246	92
0.403274	0.410737	0.414117	0.39681	0.406234	94							0.315358	0.383137	0.360249	0.317409	0.344038	94
0.402093	0.409845	0.412303	0.395528	0.404942	96							0.314435	0.385091	0.361135	0.31756	0.344555	96
0.402898	0.410258	0.412227	0.395206	0.405147	98							0.313703	0.386448	0.362535	0.317276	0.34499	98
0.402926	0.410563	0.413177	0.395493	0.40554	100							0.314212	0.388581	0.365183	0.318432	0.346602	100
0.403794	0.411373	0.413623	0.395703	0.406124	102							0.314901	0.390321	0.367044	0.319804	0.348017	102
0.403632	0.411789	0.413839	0.395629	0.406222	104							0.314467	0.391283	0.367546	0.32041	0.348426	104
0.404786	0.413346	0.415011	0.397249	0.407598	106							0.315077	0.392945	0.369286	0.321972	0.34982	106
0.405142	0.41418	0.415312	0.397585	0.408055	108							0.315133	0.392422	0.369248	0.322274	0.349769	108
0.405461	0.414032	0.41534	0.396933	0.407941	110							0.315735	0.392641	0.370047	0.323048	0.350368	110
0.405249	0.414545	0.416598	0.397491	0.408471	112							0.316182	0.394586	0.371058	0.323638	0.351366	112
0.405422	0.415162	0.416461	0.398016	0.408765	114							0.316461	0.395786	0.372674	0.325439	0.35259	114
0.406725	0.415906	0.416712	0.398322	0.409416	116							0.317226	0.397231	0.373604	0.326442	0.353626	116
0.408014	0.417382	0.418079	0.399142	0.410654	118							0.317788	0.398165	0.374721	0.327469	0.354536	118
0.409357	0.41856	0.419731	0.399952	0.4119	120							0.318297	0.398389	0.375639	0.328534	0.355215	120
0.409988	0.420115	0.420529	0.401098	0.412933	122							0.319407	0.399256	0.376716	0.330135	0.356378	122
0.411874	0.421578	0.42227	0.402893	0.414654	124							0.320174	0.399934	0.377356	0.331332	0.357199	124
0.411847	0.421939	0.421856	0.402626	0.414567	126							0.321443	0.401341	0.378992	0.333323	0.358775	126
0.413461	0.422556	0.422619	0.402727	0.415341	128							0.321667	0.402757	0.379452	0.334197	0.359518	128
0.414633	0.42393	0.423764	0.403374	0.416425	130							0.323272	0.40564	0.380828	0.335349	0.361272	130
0.413811	0.423536	0.422777	0.403046	0.415792	132							0.324491	0.406756	0.381564	0.33666	0.362368	132
0.414857	0.424405	0.42396	0.403619	0.41671	134							0.325475	0.408073	0.381479	0.337582	0.363152	134
0.416561	0.425782	0.424738	0.404628	0.417927	136							0.32664	0.408991	0.382015	0.33854	0.364046	136
0.416068	0.426011	0.42493	0.404433	0.41786	138							0.327081	0.411109	0.383243	0.341137	0.365642	138
0.41764	0.426645	0.425401	0.404704	0.418598	140							0.328338	0.413222	0.383563	0.343112	0.367059	140
0.418277	0.428182	0.426573	0.406132	0.419791	142							0.329628	0.414756	0.385292	0.343915	0.368397	142
0.419796	0.429191	0.427088	0.40699	0.420766	144							0.330552	0.414487	0.386899	0.344923	0.369215	144
0.41896	0.428977	0.42767	0.406414	0.420505	146							0.332222	0.415146	0.389677	0.346897	0.370986	146
0.419771	0.42884	0.427226	0.405764	0.420401	148							0.335016	0.414471	0.390265	0.347785	0.371884	148
0.42035	0.430288	0.428342	0.407163	0.421536	150							0.339661	0.415399	0.391927	0.349282	0.374067	150
0.421107	0.431174	0.429825	0.40833	0.422609	152							0.341657	0.415113	0.391728	0.349902	0.3746	152
0.422071	0.431057	0.429448	0.408567	0.422786	154							0.344147	0.415317	0.392219	0.352128	0.375953	154
0.42261	0.432221	0.431071	0.409639	0.423885	156							0.347147	0.415873	0.392745	0.353927	0.377423	156
0.423655	0.433692	0.432332	0.411203	0.42522	158							0.348725	0.416304	0.393146	0.357155	0.378833	158
0.425562	0.435387	0.43368	0.412287	0.426729	160							0.351382	0.417877	0.394	0.358532	0.380448	160
0.426795	0.436457	0.434459	0.412949	0.427665	162							0.352731	0.419138	0.393792	0.359751	0.381353	162
0.427971	0.436906	0.434542	0.41348	0.428225	164							0.35473	0.419356	0.393721	0.361725	0.382383	164
0.428797	0.438145	0.435895	0.414603	0.42936	166							0.357955	0.420373	0.39291	0.362785	0.383506	166
0.429389	0.438899	0.436142	0.415017	0.429862	168							0.359534	0.421829	0.394374	0.364439	0.385044	168
0.429591	0.439609	0.43688	0.415627	0.430427	170							0.363002	0.423937	0.395328	0.366966	0.387308	170
0.43078	0.441425	0.438383	0.417341	0.431982	172							0.364953	0.425113	0.394691	0.367675	0.388108	172
0.432859	0.442192	0.439061	0.417654	0.432942	174							0.368484	0.42678	0.395552	0.368965	0.389945	174
0.433531	0.443282	0.440828	0.418521	0.434041	176							0.371206	0.428562	0.395048	0.369061	0.390969	176
0.434201	0.444583	0.442065	0.419656	0.435126	178							0.373596	0.429174	0.394151	0.369694	0.391654	178
0.434758	0.445706	0.44286	0.420809	0.436033	180							0.376989	0.430463	0.394166	0.370476	0.393024	180
0.435175	0.445826	0.442549	0.420812	0.436091	182							0.380377	0.430327	0.393397	0.370132	0.393558	182
0.435589	0.446274	0.443206	0.420791	0.436465	184							0.383298	0.431766	0.393141	0.370956	0.39479	184
0.436727	0.447709	0.44386	0.421839	0.437534	186							0.385733	0.432725	0.393061	0.371054	0.395643	186
0.43751	0.447816	0.444321	0.421986	0.437908	188							0.389271	0.433539	0.393762	0.37134	0.396978	188
0.437128	0.447342	0.4437	0.422009	0.437545	190							0.393148	0.433754	0.394922	0.372111	0.398484	190
0.437481	0.448052	0.444507	0.421861	0.437975	192							0.396619	0.433619	0.395414	0.373084	0.399684	192
0.438252	0.448333	0.444343	0.42173	0.438164	194							0.401091	0.432837	0.394918	0.373477	0.400581	194
0.438645	0.450053	0.445967	0.423684	0.439587	196							0.404919	0.432745	0.395385	0.374088	0.401784	196
0.440625	0.450729	0.446935	0.424526	0.440704	198							0.409491	0.43366	0.396474	0.375515	0.403785	198
0.440393	0.451844	0.447693	0.425187	0.441279	200							0.414282	0.435183	0.396581	0.37597	0.405504	200
0.441314	0.452471	0.448723	0.425832	0.442085	202							0.423413	0.437102	0.397031	0.377719	0.408816	202
0.44106	0.45284	0.449258	0.426183	0.442335	204							0.432449	0.436572	0.397243	0.378797	0.411266	204
0.442635	0.453957	0.45006	0.426824	0.443369	206							0.444967	0.436252	0.397623	0.379416	0.414564	206
0.444547	0.454854	0.45117	0.42802	0.444648	208							0.460845	0.435489	0.397636	0.380023	0.418499	208
0.444504	0.455515	0.451237	0.428409	0.444916	210							0.479184	0.436384	0.39879	0.381158	0.423879	210
0.444815	0.455277	0.450948	0.42822	0.444815	212							0.496188	0.435294	0.399188	0.382052	0.428181	212
0.445061	0.455971	0.45129	0.428969	0.445323	214							0.504633	0.433153	0.398609	0.381136	0.429383	214
0.44572	0.456718	0.452144	0.429589	0.446043	216							0.505521	0.431741	0.39848	0.381008	0.429188	216
0.446755	0.45708	0.452366	0.430003	0.446551	218							0.502327	0.43059	0.397606	0.380578	0.427775	218
0.446492	0.457116	0.45214	0.430314	0.446516	220							0.497348	0.430115	0.397189	0.380878	0.426382	220
0.447163	0.457842	0.453454	0.430946	0.447351	222							0.492502	0.43004	0.397151	0.381795	0.425372	222
0.447279	0.458198	0.453788	0.431168	0.447608	224							0.485758	0.429186	0.395786	0.381801	0.423133	224
0.448018	0.458305	0.453694	0.431559	0.447894	226							0.479242	0.429687	0.396455	0.382018	0.42185	226
0.448486	0.459052	0.4548	0.432523	0.448715	228							0.475021	0.428867	0.395198	0.381212	0.420075	228
0.448951	0.459313	0.454483	0.432196	0.448736	230							0.470613	0.427986	0.393859	0.381012	0.418367	230
0.450702	0.459769	0.454486	0.432893	0.449463	232							0.468753	0.4283	0.394345	0.381985	0.418346	232
0.451386	0.460935	0.455169	0.433657	0.450287	234							0.467862	0.427951	0.394291	0.381949	0.418013	234
0.450971	0.460883	0.455409	0.43428	0.450386	236							0.468247	0.427356	0.394496	0.382439	0.418135	236
0.450427	0.460448	0.455136	0.434107	0.450029	238							0.468972	0.426796	0.394927	0.383298	0.418498	238
0.451932	0.460812	0.455524	0.434103	0.450593	240							0.469722	0.427094	0.39561	0.383616	0.41901	240
0.453237	0.461719	0.457018	0.435414	0.451847	242							0.46894	0.427176	0.396031	0.383643	0.418947	242
0.452844	0.461979	0.456358	0.435175	0.451589	244							0.468028	0.426298	0.395976	0.383622	0.418481	244
0.45392	0.462449	0.457259	0.435708	0.452334	246							0.468374	0.426305	0.396425	0.383396	0.418625	246
0.453691	0.462961	0.457366	0.436447	0.452616	248							0.467645	0.426457	0.396604	0.383645	0.418588	248
0.454656	0.462699	0.458177	0.437159	0.453173	250							0.465125	0.425877	0.395999	0.383024	0.417506	250
0.455918	0.463961	0.458308	0.437968	0.454038	252							0.462909	0.425956	0.397075	0.383686	0.417407	252
0.45475	0.46457	0.459268	0.438279	0.454217	254							0.461597	0.426682	0.397158	0.384541	0.417494	254
0.456757	0.465392	0.45979	0.439692	0.455408	256							0.459439	0.42561	0.396257	0.384286	0.416398	256
0.456969	0.46583	0.460487	0.439462	0.455687	258							0.457118	0.424952	0.395621	0.384108	0.41545	258
0.456113	0.464753	0.459741	0.438846	0.454863	260							0.456206	0.424957	0.395722	0.383914	0.4152	260
0.454703	0.464126	0.459208	0.438209	0.454061	262							0.456263	0.425345	0.395837	0.386278	0.415931	262
0.454895	0.463617	0.459041	0.43812	0.453918	264							0.455957	0.424834	0.394414	0.386495	0.415425	264
0.456522	0.464531	0.459901	0.439192	0.455036	266							0.457145	0.426993	0.395453	0.388065	0.416914	266
0.456567	0.464328	0.459339	0.438825	0.454765	268							0.455759	0.426688	0.39456	0.386879	0.415972	268
0.456388	0.464539	0.459879	0.438872	0.45492	270							0.456458	0.428301	0.394897	0.387936	0.416898	270
0.457687	0.465258	0.460659	0.43991	0.455878	272							0.456488	0.429185	0.39465	0.388589	0.417228	272
0.457193	0.465184	0.461146	0.439854	0.455844	274							0.454973	0.428839	0.393683	0.38803	0.416381	274
0.458954	0.465991	0.460882	0.440291	0.45653	276							0.452999	0.427812	0.392929	0.387652	0.415348	276
0.457964	0.466084	0.461399	0.440627	0.456519	278							0.453566	0.427692	0.393065	0.389216	0.415885	278
0.459536	0.46679	0.462177	0.441537	0.45751	280							0.452854	0.428441	0.393394	0.389772	0.416116	280
0.45877	0.466377	0.461617	0.440794	0.456889	282							0.452664	0.428497	0.394174	0.389632	0.416242	282
0.459262	0.466615	0.462006	0.441566	0.457363	284							0.452662	0.428871	0.393498	0.388879	0.415978	284
0.459544	0.466364	0.461557	0.441459	0.457231	286							0.452719	0.428648	0.392365	0.389003	0.415684	286
0.459797	0.467294	0.46222	0.441907	0.457804	288							0.452868	0.428357	0.392353	0.388805	0.415596	288
0.459419	0.466605	0.462126	0.441153	0.457326	290							0.454249	0.42935	0.393602	0.389707	0.416727	290
0.461058	0.467209	0.462312	0.442274	0.458214	292							0.454324	0.42866	0.392402	0.391534	0.41673	292
0.46259	0.468867	0.463657	0.443584	0.459674	294							0.455118	0.42818	0.391587	0.390458	0.416336	294
0.46242	0.468583	0.463989	0.443439	0.459608	296							0.4561	0.428348	0.391599	0.390352	0.4166	296
0.464095	0.470511	0.464904	0.444988	0.461125	298							0.456167	0.428045	0.391045	0.390101	0.41634	298
0.46449	0.471017	0.466018	0.445547	0.461768	300							0.456689	0.427436	0.390235	0.38852	0.41572	300
0.46472	0.470663	0.465112	0.445586	0.46152	302							0.45772	0.427335	0.391429	0.388988	0.416368	302
0.464255	0.469818	0.464411	0.445141	0.460906	304							0.460059	0.427366	0.390508	0.387958	0.416473	304
0.463433	0.468923	0.464082	0.444243	0.46017	306							0.462542	0.426282	0.389216	0.386684	0.416181	306
0.464207	0.46992	0.465027	0.444814	0.460992	308							0.465239	0.425586	0.388382	0.385952	0.41629	308
0.464392	0.469297	0.4647	0.444303	0.460673	310							0.468004	0.424366	0.38728	0.385059	0.416177	310
0.463244	0.468507	0.463455	0.443791	0.459749	312							0.470612	0.424957	0.387461	0.385737	0.417192	312
0.463418	0.468875	0.46369	0.444021	0.460001	314							0.4726	0.424381	0.388279	0.385758	0.417755	314
0.462021	0.468359	0.464361	0.443886	0.459657	316							0.473439	0.424013	0.388939	0.385882	0.418068	316
0.462829	0.469208	0.465101	0.444701	0.46046	318							0.47135	0.42198	0.387277	0.383596	0.416051	318
0.464413	0.470429	0.466104	0.446061	0.461752	320							0.472021	0.423427	0.388436	0.383985	0.416967	320
0.464857	0.471187	0.466772	0.446867	0.462421	322							0.470854	0.422254	0.387331	0.383597	0.416009	322
0.464802	0.471027	0.466525	0.446863	0.462304	324							0.470182	0.421905	0.387124	0.383645	0.415714	324
0.464317	0.471476	0.466957	0.447234	0.462496	326							0.468147	0.421163	0.386929	0.383489	0.414932	326
0.46501	0.471083	0.466978	0.447268	0.462585	328							0.466735	0.42097	0.386252	0.382757	0.414179	328
0.46603	0.472562	0.467147	0.447988	0.463432	330							0.465826	0.420115	0.385544	0.38295	0.413609	330
0.465479	0.472604	0.467728	0.448281	0.463523	332							0.463097	0.419274	0.384675	0.382457	0.412375	332
0.465677	0.472021	0.466935	0.448208	0.46321	334							0.461403	0.419793	0.38438	0.381551	0.411782	334
0.465501	0.472177	0.467764	0.448775	0.463554	336							0.458459	0.418371	0.383157	0.379932	0.40998	336
0.466357	0.472671	0.46841	0.449201	0.46416	338							0.456984	0.417687	0.382771	0.379787	0.409307	338
0.467053	0.473325	0.468885	0.449555	0.464705	340							0.455724	0.417524	0.381882	0.379199	0.408582	340
0.468024	0.473908	0.468513	0.449869	0.465078	342							0.460116	0.41754	0.38169	0.378893	0.40956	342
0.467423	0.474382	0.469816	0.45047	0.465523	344							0.466824	0.417454	0.381768	0.379203	0.411312	344
0.467557	0.473225	0.468059	0.44915	0.464498	346							0.475835	0.416851	0.382429	0.379626	0.413685	346
0.469763	0.474037	0.469378	0.450485	0.465916	348							0.486745	0.416882	0.382251	0.379415	0.416323	348
0.46976	0.475223	0.469895	0.450821	0.466425	350							0.499034	0.416861	0.381339	0.37941	0.419161	350
0.468596	0.473918	0.47031	0.450614	0.465859	352							0.50832	0.416761	0.381739	0.379819	0.42166	352
0.467874	0.474111	0.469789	0.450624	0.465599	354							0.51501	0.41797	0.381913	0.380295	0.423797	354
0.47047	0.475192	0.470845	0.451174	0.46692	356							0.519903	0.418369	0.381722	0.379599	0.424898	356
0.471456	0.475211	0.470509	0.451117	0.467073	358							0.523121	0.418909	0.38243	0.381158	0.426405	358
0.471272	0.474992	0.470752	0.451584	0.46715	360							0.523016	0.418511	0.382056	0.379987	0.425893	360
0.470139	0.475537	0.471162	0.452278	0.467279	362							0.519949	0.418204	0.382017	0.379684	0.424963	362
0.469745	0.474513	0.470474	0.451759	0.466623	364							0.51644	0.418686	0.38145	0.379589	0.424041	364
0.469499	0.473402	0.469122	0.450519	0.465635	366							0.511895	0.419104	0.380747	0.378846	0.422648	366
0.471037	0.473717	0.46928	0.450966	0.46625	368							0.505978	0.418551	0.380234	0.378347	0.420778	368
0.470915	0.473757	0.470046	0.451276	0.466498	370							0.50143	0.418395	0.380573	0.378044	0.419611	370
0.470597	0.473734	0.469533	0.451194	0.466265	372							0.497392	0.41977	0.381167	0.37838	0.419177	372
0.471167	0.472573	0.469202	0.450818	0.46594	374							0.493817	0.420646	0.38166	0.380317	0.41911	374
0.473403	0.473663	0.469184	0.451643	0.466973	376							0.488138	0.419968	0.3812	0.378951	0.417064	376
0.47395	0.47373	0.470599	0.451697	0.467494	378							0.484643	0.420085	0.380979	0.379001	0.416177	378
0.474573	0.473583	0.469699	0.451674	0.467382	380							0.481693	0.421996	0.381373	0.37891	0.415993	380
0.474921	0.474081	0.471066	0.452373	0.46811	382							0.478749	0.421781	0.380511	0.37931	0.415088	382
0.474922	0.473772	0.470448	0.452544	0.467921	384							0.476816	0.42168	0.379492	0.378706	0.414174	384
0.474815	0.474656	0.47155	0.453343	0.468591	386							0.474566	0.422107	0.37915	0.377448	0.413318	386
0.475626	0.475553	0.471746	0.453694	0.469154	388							0.473966	0.422183	0.379141	0.377043	0.413083	388
0.476406	0.476086	0.472226	0.454282	0.46975	390							0.472646	0.421495	0.378683	0.376368	0.412298	390
0.47487	0.475347	0.471118	0.453569	0.468726	392							0.471351	0.421361	0.378017	0.375525	0.411564	392
0.474778	0.47534	0.471377	0.453545	0.46876	394							0.470806	0.421747	0.378563	0.375735	0.411713	394
0.473913	0.47518	0.471545	0.453708	0.468587	396							0.47143	0.421559	0.379491	0.376824	0.412326	396
0.47356	0.475219	0.472177	0.453532	0.468622	398							0.470794	0.420147	0.37866	0.375259	0.411215	398
0.474468	0.475421	0.472108	0.454003	0.469	400							0.470722	0.419419	0.378363	0.374559	0.410766	400
0.473973	0.476198	0.472861	0.454283	0.469329	402							0.472208	0.418904	0.378515	0.375303	0.411233	402
0.474403	0.477381	0.473658	0.455473	0.470229	404							0.474304	0.41726	0.37745	0.373915	0.410732	404
0.474485	0.47686	0.473947	0.455805	0.470274	406							0.476089	0.41786	0.377635	0.373731	0.411329	406
0.473251	0.476694	0.473294	0.455446	0.469671	408							0.477676	0.418446	0.377834	0.374062	0.412005	408
0.4747	0.477687	0.474227	0.456377	0.470748	410							0.479775	0.417787	0.377717	0.372847	0.412032	410
0.474319	0.477485	0.47446	0.456444	0.470677	412							0.481494	0.417605	0.377616	0.37243	0.412286	412
0.474779	0.477503	0.474749	0.456771	0.470951	414							0.483932	0.416092	0.377519	0.371877	0.412355	414
0.475198	0.477999	0.475509	0.457098	0.471451	416							0.484993	0.416395	0.378214	0.371548	0.412787	416
0.474512	0.477575	0.474746	0.456562	0.470849	418							0.485762	0.415511	0.377537	0.37066	0.412368	418
0.475242	0.477999	0.474976	0.457012	0.471307	420							0.485883	0.415448	0.376833	0.370071	0.412059	420
0.474606	0.478289	0.475594	0.457263	0.471438	422							0.486632	0.415098	0.37659	0.369335	0.411914	422
0.474764	0.479042	0.476899	0.458547	0.472313	424							0.486783	0.417793	0.379418	0.370726	0.41368	424
0.476476	0.480274	0.477835	0.459998	0.473646	426							0.485413	0.418161	0.379918	0.369466	0.41324	426
0.475962	0.48062	0.478329	0.460902	0.473953	428							0.484689	0.419261	0.380312	0.369005	0.413317	428
0.476794	0.481956	0.479422	0.461112	0.474821	430							0.481072	0.419682	0.379043	0.367706	0.411876	430
0.477886	0.483208	0.479361	0.462821	0.475819	432							0.479277	0.422254	0.379001	0.367844	0.412094	432
0.480649	0.48502	0.481738	0.464141	0.477887	434							0.476458	0.422079	0.379104	0.368334	0.411494	434
0.48125	0.484896	0.481674	0.464274	0.478023	436							0.473832	0.421168	0.37792	0.366483	0.40985	436
0.481268	0.4854	0.481771	0.465098	0.478384	438							0.47127	0.420684	0.378822	0.366656	0.409358	438
0.481467	0.485292	0.481402	0.464506	0.478166	440							0.468852	0.41953	0.377926	0.365826	0.408034	440
0.4804	0.485026	0.481306	0.464055	0.477697	442							0.465803	0.418832	0.378255	0.366579	0.407367	442
0.481729	0.486186	0.481997	0.464965	0.478719	444							0.463734	0.418344	0.378597	0.368583	0.407314	444
0.481327	0.485573	0.481834	0.464692	0.478356	446							0.461296	0.416819	0.378836	0.369309	0.406565	446
0.480297	0.485386	0.482408	0.464603	0.478174	448							0.458667	0.415495	0.378418	0.370057	0.405659	448
0.480913	0.485899	0.482668	0.465442	0.47873	450	addition of ML-SA1						0.456554	0.414576	0.378272	0.372224	0.405406	450	addition of ML-SA1
0.48172	0.486438	0.482908	0.465647	0.479178	452							0.455311	0.414593	0.379147	0.374542	0.405898	452
0.838835	0.974899	0.873262	0.833181	0.880044	454							0.45453	0.414725	0.380285	0.377036	0.406644	454
0.92135	1.18915	1.09252	0.975868	1.04472	456							0.453578	0.415066	0.381574	0.378781	0.40725	456
0.952282	1.2667	1.17997	1.03983	1.1097	458							0.458185	0.426074	0.397988	0.392253	0.418625	458
0.968782	1.30544	1.22173	1.07307	1.14225	460							0.47096	0.463581	0.450499	0.439464	0.456126	460
0.982513	1.33195	1.24605	1.09445	1.16374	462							0.489061	0.507416	0.512531	0.480609	0.497404	462
0.993441	1.34934	1.26139	1.10999	1.17854	464							0.510034	0.559865	0.582888	0.521091	0.54347	464
1.0029	1.36301	1.2746	1.12031	1.19021	466							0.532172	0.609045	0.644622	0.553397	0.584809	466
1.01156	1.3744	1.28449	1.12951	1.19999	468							0.551098	0.644631	0.687333	0.575978	0.61476	468
1.01995	1.38448	1.29157	1.13884	1.20871	470							0.569576	0.669456	0.717	0.593934	0.637492	470
1.02549	1.39126	1.29816	1.14707	1.2155	472							0.582487	0.68637	0.737612	0.60666	0.653282	472
1.02778	1.39511	1.30273	1.15308	1.21967	474							0.595634	0.701441	0.755045	0.617584	0.667426	474
1.03484	1.40494	1.31317	1.16421	1.22929	476							0.623634	0.717242	0.773459	0.630501	0.686209	476
1.04265	1.41273	1.31824	1.17016	1.23594	478							0.652739	0.734295	0.794075	0.645011	0.70653	478
1.0477	1.41972	1.32383	1.17821	1.24236	480							0.674111	0.750459	0.815544	0.659038	0.724788	480
1.05249	1.42263	1.32687	1.1797	1.24542	482							0.691132	0.768833	0.839004	0.67328	0.743062	482
1.05707	1.42656	1.32881	1.1843	1.24919	484							0.707392	0.786414	0.862073	0.687139	0.760755	484
1.06149	1.43197	1.33513	1.1898	1.2546	486							0.7253	0.799494	0.880673	0.697118	0.775646	486
1.06864	1.43817	1.33904	1.19846	1.26108	488							0.741131	0.80628	0.890714	0.704602	0.785682	488
1.07576	1.44718	1.34419	1.20639	1.26838	490							0.759801	0.818748	0.899313	0.711537	0.79735	490
1.07768	1.44969	1.34835	1.21003	1.27144	492							0.778234	0.826533	0.906955	0.718914	0.807659	492
1.08303	1.45215	1.35239	1.21295	1.27513	494							0.791231	0.831702	0.910243	0.723075	0.814063	494
1.08556	1.45576	1.35555	1.21522	1.27802	496							0.805465	0.837099	0.917582	0.730772	0.822729	496
1.0888	1.46053	1.35549	1.2163	1.28028	498							0.815262	0.839555	0.921462	0.735571	0.827962	498
1.08907	1.46067	1.35719	1.21752	1.28111	500							0.825143	0.849814	0.928278	0.743514	0.836687	500
1.09235	1.46929	1.36131	1.22015	1.28578	502							0.835083	0.862371	0.933218	0.749279	0.844988	502
1.10186	1.46965	1.3636	1.21995	1.28877	504							0.846989	0.8704	0.942348	0.758732	0.854617	504
1.10458	1.47017	1.36328	1.21999	1.28951	506							0.857829	0.876022	0.958458	0.770062	0.865593	506
1.10917	1.47333	1.36718	1.22341	1.29327	508							0.866628	0.882368	0.96755	0.777662	0.873552	508
1.11085	1.47486	1.36728	1.22632	1.29483	510							0.879222	0.899141	0.981508	0.789309	0.887295	510
1.11122	1.47756	1.36759	1.22664	1.29575	512							0.893394	0.912249	0.995591	0.796993	0.899557	512
1.11489	1.48196	1.37208	1.23039	1.29983	514							0.90837	0.925428	1.0151	0.808633	0.914382	514
1.10946	1.47788	1.36789	1.22811	1.29583	516							0.920084	0.938853	1.03262	0.824749	0.929077	516
1.11097	1.48193	1.37181	1.23226	1.29924	518							0.928053	0.9477	1.04235	0.831885	0.937496	518
1.10954	1.48324	1.37278	1.23286	1.2996	520							0.943052	0.955773	1.05114	0.840052	0.947506	520
1.11335	1.48875	1.37863	1.23814	1.30472	522							0.956623	0.968251	1.06366	0.85223	0.960191	522
1.11603	1.49312	1.38027	1.24063	1.30751	524							0.965474	0.976557	1.07091	0.859145	0.968022	524
1.11926	1.50073	1.38803	1.24728	1.31383	526							0.970674	0.985765	1.07938	0.867951	0.975943	526
1.12202	1.50552	1.39266	1.25023	1.31761	528							0.979856	0.996863	1.08452	0.876013	0.984311	528
1.12468	1.51014	1.39438	1.25156	1.32019	530							0.987936	1.0071	1.09189	0.886896	0.993457	530
1.12576	1.51392	1.39684	1.25438	1.32272	532							0.995344	1.01778	1.09749	0.895008	1.0014	532
1.12649	1.51573	1.39993	1.2572	1.32484	534							1.00323	1.02639	1.10026	0.902483	1.00809	534
1.12964	1.5202	1.40329	1.26118	1.32858	536							1.01149	1.03528	1.10526	0.907893	1.01498	536
1.12521	1.51795	1.40033	1.26026	1.32594	538							1.01834	1.04109	1.10872	0.915008	1.02079	538
1.12882	1.52439	1.40738	1.26911	1.33242	540							1.02569	1.04795	1.11184	0.919552	1.02626	540
1.13222	1.52623	1.40625	1.27159	1.33407	542							1.0343	1.0554	1.1171	0.9262	1.03325	542
1.12934	1.52814	1.40966	1.27582	1.33574	544							1.04237	1.06083	1.12053	0.930948	1.03867	544
1.13401	1.5326	1.41347	1.28011	1.34005	546							1.04986	1.06656	1.11978	0.93374	1.04248	546
1.1317	1.53153	1.41209	1.27828	1.3384	548							1.06296	1.07503	1.12551	0.94093	1.05111	548
1.13953	1.53725	1.41696	1.28404	1.34444	550							1.07533	1.0819	1.12838	0.946468	1.05802	550
1.14468	1.53946	1.41725	1.28622	1.3469	552							1.08663	1.08746	1.13317	0.951254	1.06463	552
1.1453	1.53729	1.41805	1.28735	1.347	554							1.09948	1.09476	1.13706	0.957947	1.07231	554
1.1466	1.5423	1.42151	1.29042	1.35021	556							1.10685	1.09656	1.13481	0.960121	1.07458	556
1.14466	1.54439	1.4213	1.29441	1.35119	558							1.11493	1.09955	1.13592	0.962735	1.07829	558
1.14834	1.54713	1.42456	1.3001	1.35503	560							1.12607	1.10678	1.14026	0.969259	1.08559	560
1.14871	1.55076	1.42695	1.30213	1.35714	562							1.13517	1.11021	1.14127	0.973227	1.08997	562
1.14909	1.5536	1.42904	1.30423	1.35899	564							1.14353	1.11486	1.14314	0.977551	1.09477	564
1.15268	1.55587	1.43176	1.30587	1.36154	566							1.15069	1.11773	1.14582	0.982379	1.09916	566
1.15423	1.56002	1.4357	1.30972	1.36492	568							1.15992	1.12224	1.14883	0.986029	1.10425	568
1.15825	1.5637	1.43799	1.3136	1.36838	570							1.16551	1.12293	1.1467	0.988367	1.10588	570
1.15988	1.56133	1.4367	1.31268	1.36765	572							1.17497	1.12956	1.15203	0.993193	1.11244	572
1.16416	1.5663	1.44234	1.31722	1.37251	574							1.1793	1.13212	1.15275	0.997175	1.11534	574
1.16212	1.56518	1.44051	1.31779	1.3714	576							1.18822	1.13815	1.15742	1.00422	1.12201	576
1.16373	1.56814	1.44241	1.32054	1.3737	578							1.19386	1.14015	1.15826	1.00841	1.12517	578
1.16849	1.57528	1.44875	1.32788	1.3801	580							1.1977	1.14363	1.16042	1.01237	1.12853	580
1.1628	1.57072	1.4457	1.32614	1.37634	582							1.2009	1.1458	1.16119	1.01374	1.13041	582
1.16474	1.57487	1.44744	1.3305	1.37939	584							1.20626	1.14711	1.16229	1.01824	1.13348	584
1.16452	1.57874	1.44997	1.33437	1.3819	586							1.20703	1.14642	1.15895	1.0179	1.13257	586
1.16456	1.58012	1.45128	1.33623	1.38305	588							1.21092	1.15017	1.16193	1.02085	1.13597	588
1.16562	1.58565	1.45432	1.34102	1.38665	590							1.21655	1.15462	1.16455	1.02578	1.14037	590
1.16636	1.58679	1.45661	1.34495	1.38868	592							1.22102	1.15834	1.16815	1.03253	1.14501	592
1.16532	1.58854	1.45592	1.34603	1.38895	594							1.22345	1.1589	1.16732	1.03301	1.14567	594
1.16641	1.59022	1.45846	1.34821	1.39082	596							1.2254	1.15975	1.16926	1.03557	1.1475	596
1.16319	1.59081	1.45988	1.35056	1.39111	598							1.23099	1.16525	1.17089	1.03978	1.15173	598
1.16477	1.59287	1.45911	1.35056	1.39183	600							1.23329	1.16583	1.17052	1.04261	1.15306	600
1.16912	1.59722	1.46358	1.35466	1.39615	602							1.23934	1.17256	1.1754	1.04849	1.15895	602
1.17093	1.5996	1.46614	1.3564	1.39827	604							1.24346	1.17408	1.17674	1.05041	1.16117	604
1.17368	1.60295	1.4695	1.36175	1.40197	606							1.24653	1.17503	1.17689	1.05263	1.16277	606
1.17598	1.60498	1.47154	1.36435	1.40421	608							1.24834	1.17851	1.17782	1.05619	1.16521	608
1.1761	1.60667	1.47053	1.36788	1.4053	610							1.2531	1.18118	1.17958	1.05783	1.16792	610
1.17753	1.6058	1.47403	1.3711	1.40711	612							1.25521	1.18212	1.17878	1.05893	1.16876	612
1.18033	1.60948	1.47555	1.37327	1.40966	614							1.25823	1.18256	1.17837	1.06079	1.16999	614
1.17601	1.61053	1.47621	1.37575	1.40962	616							1.26144	1.1832	1.1792	1.06152	1.17134	616
1.1767	1.61069	1.4771	1.37636	1.41021	618							1.26248	1.18401	1.17646	1.06176	1.17118	618
1.17974	1.61531	1.48099	1.38094	1.41424	620							1.26571	1.18568	1.17852	1.0654	1.17383	620
1.1847	1.61793	1.48168	1.3833	1.4169	622							1.27151	1.189	1.17977	1.0676	1.17697	622
1.18282	1.61571	1.48148	1.3822	1.41555	624							1.27406	1.19131	1.18264	1.07088	1.17972	624
1.18314	1.6191	1.48265	1.38495	1.41746	626							1.27619	1.19329	1.18212	1.07421	1.18145	626
1.18181	1.62026	1.4848	1.38601	1.41822	628							1.27844	1.19325	1.18173	1.07556	1.18225	628
1.18672	1.62082	1.48421	1.3906	1.42059	630							1.28264	1.19723	1.18496	1.08015	1.18625	630
1.1863	1.62424	1.48665	1.39097	1.42204	632							1.28717	1.19976	1.18571	1.08544	1.18952	632
1.19018	1.62623	1.49048	1.39256	1.42486	634							1.28773	1.19903	1.18578	1.0872	1.18993	634
1.18662	1.62515	1.4886	1.39317	1.42338	636							1.29227	1.20305	1.1871	1.09102	1.19336	636
1.19036	1.63158	1.49289	1.39704	1.42797	638							1.29218	1.2026	1.18653	1.09175	1.19326	638
1.19444	1.63643	1.49536	1.40109	1.43183	640							1.2954	1.20516	1.18765	1.09356	1.19544	640
1.19406	1.63609	1.49501	1.39919	1.43109	642							1.30022	1.20845	1.19127	1.09807	1.1995	642
1.1939	1.63678	1.49437	1.39978	1.43121	644							1.30528	1.21309	1.19387	1.1031	1.20383	644
1.1918	1.63483	1.49468	1.39884	1.43004	646							1.30587	1.21419	1.19346	1.10388	1.20435	646
1.19032	1.63571	1.49382	1.39963	1.42987	648							1.30837	1.21607	1.19516	1.10563	1.20631	648
1.19436	1.63965	1.49926	1.40482	1.43452	650							1.30867	1.21572	1.194	1.10582	1.20605	650
