# Supplementary material for: Agonist-mediated switching of ion selectivity in TPC2 differentially promotes lysosomal function
Source: eLife. 2020 Mar 16;9:e54712. doi: 10.7554/eLife.54712 (PMC7108868; doi:10.7554/eLife.54712)
Supplement: Figure 1—figure supplement 4—source data 1. [file elife-54712-fig1-figsupp4-data1.xlsx]

## Sheet: Fig 1 - SI4A-C
Figure 1 - figure supplement 4A) Ca imaging experiments of TPC2-A1-N and analogs (hTPC2)
	Ionomycine*	TPC2-A1-N	SGA-34	SGA-1	SGA-2	SGA-3	SGA-4	SGA-8	SGA-9	SGA-10	SGA-11	SGA-12	SGA-13	SGA-15	SGA-16	SGA-27	SGA-28	SGA-31	SGA-32	SGA-33	SGA-38	SGA-39	SGA-40	SGA-70	SGA-71	SGA-72	SGA-73	SGA-75	SGA-76	SGA-77	SGA-78	SGA-84	SGA-85	SGA-86	SGA-90	SGA-94	SGA-108	SGA-111	SGA-112	SGA-113	SGA-114	SGA-115	SGA-127	SGA-132	SGA-133	SGA-136	SGA-137	SGA-138
mean	0.929078	0.54865	-0.00180019	0.0230025	0.310819	0.359141	0.301442	0.173825	0.272923	-0.072934	0.143629	0.0473532	0.273966	0.0332576	0.0234826	0.253566	-0.0370499	0.00630877	-0.0116525	0.515593	-0.0143412	0.302216	0.43798	0.391111	0.183154	0.0418745	0.00366034	0.353658	0.0363779	-0.0296965	0.193144	0.303374	0.671784	0.644919	0.525527	-0.034398	0.524303	0.650663	0.0784479	-0.0181784	0.273056	-0.0377886	0.00258674	0.473417	0.354033	-0.026518	-0.00925661	-0.0239575
SD	0.381523	0.338529	0.00784064	0.026453	0.223035	0.232807	0.256404	0.132273	0.126701	0.0426825	0.119114	0.11951	0.0256147	0.028223	0.0474139	0.133534	0.0155868	0.0223515	0.023397	0.307345	0.0212696	0.154238	0.260211	0.276872	0.14739	0.0845087	0.0557568	0.183626	0.093625	0.016308	0.036866	0.153544	0.316467	0.509107	0.256389	0.0184451	0.309488	0.485591	0.0756557	0.0252741	0.142002	0.026164	0.010368	0.254192	0.304441	0.00940436	0.00632129	0.0282801
SEM	0.04593	0.0235864	0.00184806	0.00935253	0.0437408	0.0276291	0.0313248	0.0288643	0.0227561	0.0106706	0.0266347	0.0243949	0.00640367	0.0089249	0.0142958	0.0206048	0.00449952	0.00383324	0.00675413	0.0422171	0.00803914	0.0385596	0.03879	0.0474831	0.0321632	0.0172503	0.0116261	0.0400704	0.0241739	0.00364658	0.0139341	0.0580342	0.030738	0.0680323	0.0378024	0.00532465	0.0618976	0.0723876	0.0195342	0.00729601	0.0393843	0.00570946	0.00423273	0.0679357	0.0878847	0.00297392	0.00223491	0.0106889
n	69	206	18	8	26	71	67	21	31	16	20	24	16	10	11	42	12	34	12	53	7	16	45	34	21	24	23	21	15	20	7	7	106	56	46	12	25	45	15	12	13	21	6	14	12	10	8	7
Figure 1 - figure supplement 4B) Ca imaging experiments of TPC2-A1-N and analogs (ctl)
	Ionomycine*	TPC2-A1-N	SGA-34	SGA-1	SGA-2	SGA-3	SGA-4	SGA-8	SGA-9	SGA-10	SGA-11	SGA-12	SGA-13	SGA-15	SGA-16	SGA-27	SGA-28	SGA-31	SGA-32	SGA-33	SGA-38	SGA-39	SGA-40	SGA-70	SGA-71	SGA-72	SGA-73	SGA-75	SGA-76	SGA-77	SGA-78	SGA-84	SGA-85	SGA-86	SGA-90	SGA-94	SGA-108	SGA-111	SGA-112	SGA-113	SGA-114	SGA-115	SGA-127	SGA-132	SGA-133	SGA-136	SGA-137	SGA-138
mean	1.28664	0.0245504	0.000497673	-0.0281325	0.0159605	0.0256226	0.0148136	-0.0331425	0.00144064	-0.0315118	0.0102605	-0.0198107	0.281969	0.00161951	-0.0214428	0.0849818	-0.0517234	0.0031057	0.00328753	0.00352018	-0.00239757	0.0171489	0.00441234	0.0224297	-0.025215	-0.048714	-0.0286745	0.0153018	0.0303436	-0.0235524	0.00857245	-0.0906867	0.139157	0.0221519	0.0124974	-0.00249755	0.0456438	0.035991	0.0584025	-0.0168438	0.0411793	-0.019679	-0.00483282	0.0788544	0.00692534	-0.011081	-0.0101322	0.0060824
SD	0.663416	0.0476091	0.0070307	0.0388236	0.0441406	0.0523273	0.0536809	0.0271916	0.0656247	0.0217895	0.0245931	0.0281819	0.0308051	0.0176959	0.0387783	0.0876838	0.0303326	0.0113608	0.00598124	0.0562039	0.0327206	0.0404368	0.0547033	0.0920203	0.0376223	0.0349881	0.0757932	0.0390019	0.0403561	0.0132491	0.014152	0.0117678	0.100499	0.0492358	0.0665805	0.0295974	0.0285933	0.064317	0.0199137	0.00443728	0.0705716	0.027122	0.00275586	0.0594158	0.0154834	0.00970125	0.00505832	0.0128193
SEM	0.0938212	0.00377565	0.00211984	0.0100242	0.00757006	0.00827368	0.00848769	0.00566984	0.0131249	0.00629008	0.00657279	0.00727654	0.0137765	0.00510837	0.0116921	0.0234345	0.00735674	0.0027554	0.00211469	0.0104368	0.00844841	0.0127872	0.0109407	0.0196188	0.00802109	0.00763503	0.0173882	0.00945935	0.013452	0.00342091	0.00577753	0.00526273	0.014357	0.00947543	0.0130575	0.0111868	0.00862121	0.0151597	0.00812974	0.00181151	0.0288107	0.00904068	0.00137793	0.0198053	0.00632106	0.00433853	0.00252916	0.00740121
n	50	159	11	15	34	40	40	23	25	12	14	15	5	12	11	14	17	17	8	29	15	10	25	22	22	21	19	17	9	15	6	5	49	27	26	7	11	18	6	6	6	9	4	9	6	5	4	3
Figure 1 - figure supplement 4C) concentration effect experiments
	TPC2-A1-N							SGA-90
conc. [µM]	mean TPC2	SD TPC2	SEM TPC2	n = 2			conc. [µM]	mean TPC2	SD TPC2	SEM TPC2	n = 2
50	2.44614	0.028722	0.0203095				50	1.99042	0.0462427	0.0326985
25	2.34788	0.0973389	0.068829				25	1.72624	0.0313354	0.0221575
12.5	2.3019	0.0946858	0.066953				12.5	1.53157	0.0288358	0.02039
6.25	1.70587	0.162378	0.114819				6.25	1.3293	0.00550129	0.00389
3.125	1.22735	0.0908957	0.064273				3.125	1.04309	0.0135404	0.0095745
1.5625	0.972689	0.0420963	0.0297665				1.5625	0.926702	0.00893161	0.0063156
0.78125	0.808234	0.00903173	0.0063864				0.78125	0.781648	0.00254261	0.0017979
0.390625	0.796416	0.0088551	0.0062615				0.390625	0.771778	0.01101	0.00778525
0	0.774469	0.0155926	0.0110256				0	0.758718	0.0156486	0.0110652
	SGA-33							SGA-108
conc. [µM]	mean TPC2	SD TPC2	SEM TPC2	n = 2			conc. [µM]	mean TPC2	SD TPC2	SEM TPC2	n = 2
50	2.00963	0.0667141	0.047174				50	3.16672	0.109657	0.0775395
25	1.75444	0.110949	0.078453				25	3.02755	0.142401	0.100693
12.5	1.44771	0.00347189	0.002455				12.5	2.5456	0.00652801	0.004616
6.25	1.22786	0.0401403	0.0283835				6.25	1.94608	0.127189	0.089936
3.125	1.08765	0.0278459	0.01969				3.125	1.19942	0.0361742	0.025579
1.5625	0.964708	0.00654604	0.00462875				1.5625	0.936166	0.00771482	0.0054552
0.78125	0.928829	0.0113883	0.00805275				0.78125	0.824333	0.00786416	0.0055608
0.390625	0.899939	0.0016494	0.0011663				0.390625	0.815244	0.0084	0.0059397
0	0.879455	0.00800063	0.0056573				0	0.803766	0.00970356	0.00686145
	SGA-85							SGA-111
conc. [µM]	mean TPC2	SD TPC2	SEM TPC2	n = 2			conc. [µM]	mean TPC2	SD TPC2	SEM TPC2	n = 2
50	2.60238	0.069959	0.0494685				50	3.32953	0.0551133	0.038971
25	2.37639	0.11481	0.081183				25	3.05024	0.153144	0.108289
12.5	2.26309	0.0415835	0.029404				12.5	2.83451	0.00263822	0.0018655
6.25	2.1518	0.0490584	0.0346895				6.25	2.07776	0.0120788	0.008541
3.125	1.67102	0.142828	0.100994				3.125	1.34806	0.0230354	0.0162885
1.5625	1.13831	0.056541	0.0399805				1.5625	1.00684	0.00263114	0.0018605
0.78125	0.859912	0.0569631	0.040279				0.78125	0.833838	0.00076615	0.00054175
0.390625	0.790648	0.00448716	0.0031729				0.390625	0.807836	0.00813251	0.00575055
0	0.783133	0.0119982	0.008484				0	0.805074	0.0096455	0.0068204
	SGA-86							SGA-132
conc. [µM]	mean TPC2	SD TPC2	SEM TPC2	n = 2			conc. [µM]	mean TPC2	SD TPC2	SEM TPC2	n = 2
50	3.12594	0.161431	0.114149				50	2.74792	0.0474518	0.0335535
25	2.88952	0.154958	0.109571				25	2.53481	0.087363	0.061775
12.5	2.31219	0.0766518	0.054201				12.5	2.33215	0.0963525	0.0681315
6.25	1.73027	0.0277645	0.0196325				6.25	1.99023	0.221763	0.15681
3.125	1.21352	0.0288287	0.020385				3.125	1.28455	0.00782131	0.0055305
1.5625	1.00048	0.025073	0.0177293				1.5625	1.04465	0.0385677	0.0272715
0.78125	0.91135	0.085648	0.0605622				0.78125	0.845667	0.00582507	0.00411895
0.390625	0.814449	0.00350951	0.0024816				0.390625	0.806478	0.00302281	0.00213745
0	0.792055	0.00232886	0.00164675				0	0.80182	0.00869324	0.00614705
