# Supplementary material for: Agonist-mediated switching of ion selectivity in TPC2 differentially promotes lysosomal function
Source: eLife. 2020 Mar 16;9:e54712. doi: 10.7554/eLife.54712 (PMC7108868; doi:10.7554/eLife.54712)
Supplement: Figure 1—figure supplement 6—source data 1. [file elife-54712-fig1-figsupp6-data1.xlsx]

## Sheet: Fig1 - SI6A-B
Figure 1 - figure supplement 6A) Ca imaging experiments of TPC2-A1-P and analogs (hTPC2)
	TPC2-A1-P	SGA-140	SGA-43	SGA-50	SGA-54	SGA-55	SGA-48	SGA-52	SGA-59	SGA-61	SGA-62	SGA-66	SGA-67	SGA-68	SGA-149	SGA-150	SGA-152	SGA-153	SGA-154	SGA-162
mean	0.325639	-0.0206882	-0.0395466	-0.0721282	-0.049458	-0.0976868	-0.027186	0.0145876	-0.0112543	-0.0265928	-0.0364652	-0.0898535	-0.0185435	-0.0995053	-0.032945	0.106689	-0.00191925	-0.04487	0.0426788	0.028718
SD	0.202442	0.0108434	0.0279201	0.0726642	0.0409126	0.0855596	0.025505	0.0363903	0.00948439	0.0185422	0.0134344	0.0455098	0.0152107	0.0163777	0.0263985	0.0808494	0.0569576	0.0237538	0.0411516	0.0349181
SEM	0.0209923	0.00409843	0.00537322	0.0187618	0.00853087	0.0178404	0.005101	0.0109721	0.00285965	0.00437044	0.00372602	0.0151699	0.00481004	0.00422871	0.00538858	0.0121885	0.00991505	0.00495301	0.00840004	0.00968454
n	93	7	27	15	23	23	25	11	11	18	13	9	10	15	24	44	33	23	24	13
Figure 1 - figure supplement 6B) Ca imaging experiments of TPC2-A1-P and analogs (ctl)
	TPC2-A1-P	SGA-140	SGA-43	SGA-50	SGA-54	SGA-55	SGA-48	SGA-52	SGA-59	SGA-61	SGA-62	SGA-66	SGA-67	SGA-68	SGA-149	SGA-150	SGA-152	SGA-153	SGA-154	SGA-162
mean	0.0206553	-0.00644315	-0.0205478	-0.0326194	-0.0238437	-0.0463034	-0.0445459	0.0204379	-0.00189612	-0.0188866	-0.0306598	-0.0706041	-0.0209978	-0.104513	-0.00901431	0.0156815	-0.00191021	-0.0318562	0.0396224	-0.0124265
SD	0.0257054	0.0113869	0.00643663	0.0186445	0.0249697	0.0168915	0.0322385	0.0118388	0.00267054	0.00797931	0.0128823	0.0137146	0.026993	0.00726885	0.00361291	0.0241085	0.0276483	0.023252	0.0293926	0.0288205
SEM	0.00469313	0.00657425	0.00194072	0.00761159	0.00943767	0.00563051	0.00894136	0.00447464	0.0011943	0.00252328	0.00576115	0.00559898	0.0120716	0.00325073	0.00147496	0.0066865	0.00874317	0.00878841	0.0119995	0.0117659
n	30	3	11	6	7	9	13	7	5	10	5	6	5	5	6	13	10	7	6	6
