# Supplementary material for: Agonist-mediated switching of ion selectivity in TPC2 differentially promotes lysosomal function
Source: eLife. 2020 Mar 16;9:e54712. doi: 10.7554/eLife.54712 (PMC7108868; doi:10.7554/eLife.54712)
Supplement: Figure 1—figure supplement 7—source data 1. [file elife-54712-fig1-figsupp7-data1.xlsx]

## Sheet: Fig1 - SI7A-B
Figure 1 - figure supplement 7 A) Statistical analysis of current densities (I; mean ± SEM) recorded at -140 mV for endolysosomes expressing TPC1 activating by TPC2-A1-N and PI(3,5)P2
	Test1	Test2	Test3	Test4	mean	SEM	n
Basal	15.7143	2	50	40	26.93	10.99	4
10uM TPC2-A1-N	37.5	24.2857	40.3	6	27.02	7.829	4
10uM TPC2-A1-N + 1uM PI(3,5)P2	2597.5	250	1676	4650	2293	922.1	4
Figure 1 - figure supplement 7 B) Statistical analysis of current densities (I; mean ± SEM) recorded at -140 mV for endolysosomes expressing TPC1 activating by TPC2-A1-P and PI(3,5)P2
	Test1	Test2	Test3	mean	SEM	n
Basal	70	10	34	38	17.4	3
10uM TPC2-A1-P	65	12	48	41.6	15.6	3
10uM TPC2-A1-P + 1uM PI(3,5)P2	5651	551	1754.62	2652	1539	3
