# Supplementary material for: Agonist-mediated switching of ion selectivity in TPC2 differentially promotes lysosomal function
Source: eLife. 2020 Mar 16;9:e54712. doi: 10.7554/eLife.54712 (PMC7108868; doi:10.7554/eLife.54712)
Supplement: Figure 1—source data 1. [file elife-54712-fig1-data1.xlsx]

## Sheet: Fig 1 J, L, Q, T
Fig. 1J TPC2-A1-N action in cells expressing TPC2 (LLAA) or expressing TPC2 (LLAA, L265P)
TPC2-A1-N (µM)	10
							mean	SE	n
TPC2 (LLAA)	0.345608	0.92121	0.138831	0.650315	0.219632		0.455119	0.145401	5
TPC2 (LLAA, L265P)	0.050647	0.0904834	0.0327127	0.0219562			0.0489498	0.0150561	4
Fig. 1L TPC2-A1-P action in cells expressing TPC2 (LLAA) or expressing TPC2 (LLAA, L265P)
TPC2-A1-P (µM)	30
							mean	SE	n
TPC2 (LLAA)	0.424897	0.374913	0.561432	0.524967			0.471552	0.0432505	4
TPC2 (LLAA, L265P)	0.015583	0.0656147	0.0136904				0.0316294	0.0170014	3
Fig. 1Q TPC2-A1-N action in cells expressing TPC2 GCaMP6s or expressing TPC2 L265P GCaMP6s
TPC2-A1-N (µM)	30
							mean	SE	n
TPC2 GCaMP6s	0.567745	1.74838	0.740939	0.800519			0.964395	0.26595	4
TPC2 L265P GCaMP6s	-0.0131059	-0.0691531	-0.0170776				-0.0331122	0.0180569	3
Fig. 1T TPC2-A1-P action in cells expressing TPC2 GCaMP6s or expressing TPC2 L265P GCaMP6s
TPC2-A1-N (µM)	60
							mean	SE	n
TPC2 GCaMP6s	0.318927	0.440294	0.201652	0.123289			0.271041	0.0692731	4
TPC2 L265P GCaMP6s	-0.0313654	-0.0512839	-0.0545907				-0.0457467	0.00725373	3

## Sheet: Fig 1 E-H
Fig. 1E) Representative Ca-signals (FLIPR generated) TPC2-A1-N
time [s]	2.5	5	7.5	10	12.5	15	17.5	20	22.5	25	27.5	30	32.5	35	37.5	40	42.5	45	47.5	50	52.5	55	57.5	60	62.5	65	67.5	70	72.5	75	77.5	80	82.5	85	87.5	90	92.5	95	97.5	100	102.5	105	107.5	110	112.5	115	117.5	120	122.5
hTPC2	1.00041	0.999383	1.0002	0.999217	0.998479	0.998137	0.996377	0.99498	0.993855	0.992991	0.992241	0.990104	0.989331	0.98816	0.987971	1.0506	1.26091	1.79701	1.54556	1.41429	1.17029	1.05735	1.10457	1.15541	1.205	1.24241	1.28494	1.32279	1.35629	1.38156	1.41163	1.43802	1.46061	1.47809	1.49814	1.51729	1.5362	1.5506	1.56821	1.58487	1.59994	1.61084	1.62377	1.63728	1.65019	1.66234	1.67168	1.68298	1.69469
NT ctl	1.00124	0.99995	0.998808	0.997278	0.996041	0.994889	0.993593	0.991972	0.991132	0.98951	0.988096	0.98711	1.05341	1.22649	1.29952	1.51964	1.27117	1.02562	0.998491	0.998344	0.99769	0.99593	0.994449	0.992096	0.990266	0.988741	0.988037	0.98691	0.986147	0.985935	0.986584	0.986731	0.987826	0.98897	0.99031	0.99094	0.992134	0.99345	0.994782	0.995552	0.997997	1.00001	1.00254	1.00431	1.00628	1.0084	1.00957	1.01159	1.01293
Fig. 1F) Representative Ca-signals (FLIPR generated) TPC2-A1-P
time [s]	2.5	5	7.5	10	12.5	15	17.5	20	22.5	25	27.5	30	32.5	35	37.5	40	42.5	45	47.5	50	52.5	55	57.5	60	62.5	65	67.5	70	72.5	75	77.5	80	82.5	85	87.5	90	92.5	95	97.5	100	102.5	105	107.5	110	112.5	115	117.5	120	122.5
hTPC2	1.00041	0.999588	1.00001	0.999507	0.998837	0.998312	0.998029	0.9964	0.995402	0.993707	0.992389	0.992106	0.991287	0.989788	0.989062	1.12507	1.59751	2.68275	2.19647	1.89218	1.2973	0.979027	0.974175	0.969922	0.966519	0.964851	0.96234	0.961371	0.961429	0.961884	0.963309	0.965145	0.967599	0.969651	0.971785	0.975363	0.979247	0.98262	0.987627	0.992082	0.996335	1.00102	1.00587	1.01098	1.01686	1.02275	1.02845	1.0347	1.04162
NT ctl	1.00116	1.00034	0.9985	0.997398	0.99625	0.994859	0.993674	0.99196	0.990518	0.990095	0.988303	0.986618	0.98653	0.987091	1.42365	2.01775	2.18982	2.65892	1.45449	0.991869	0.985411	0.983043	0.978528	0.974383	0.970538	0.968371	0.964764	0.961567	0.959273	0.957327	0.95474	0.952976	0.950909	0.949098	0.948818	0.948732	0.947731	0.947598	0.946282	0.94596	0.945717	0.945282	0.945917	0.945951	0.946517	0.947624	0.948985	0.949479	0.949891
Fig. 1G) Conc. Response TPC2-A1-N
conc. [µM]	mean TPC2	SEM	n = 4		mean ctl	SEM ctl	n = 3
50	2.69549	0.188855			1.34099	0.078937
25	2.49804	0.221473			0.998371	0.01837
12.5	2.22822	0.0884442			0.940532	0.0203429
6.25	1.55356	0.0521956			0.875365	0.0165166
3.125	1.11771	0.0542986			0.858597	0.0175144
1.5625	0.905224	0.0230857			0.857504	0.0148117
0.78125	0.835151	0.00998421			0.849814	0.016252
0.390625	0.833127	0.0163662			0.867781	0.0231276
0	0.826108	0.0180182			0.849576	0.016762
Fig. 1H) Conc. Response TPC2-A1-P
conc. [µM]	mean TPC2	SEM	n = 2		mean ctl	SEM	n = 2
50	2.34057	0.024028			0.94353	0.0007254
25	2.08442	0.051399			0.936629	0.0006402
12.5	1.78667	0.021277			0.878036	0.0007603
6.25	1.06339	0.0882315			0.809775	0.00564945
3.125	0.79014	0.00457035			0.806793	0.0006409
1.5625	0.823184	0.00478715			0.814312	0.0036868
0.78125	0.830775	0.00599155			0.81589	0.0071989
0.390625	0.837297	0.00294195			0.833316	0.0087873
0	0.826779	0.0111884			0.81505	0.00911955
[truncated: 203 more columns]
