# Supplementary material for: Agonist-mediated switching of ion selectivity in TPC2 differentially promotes lysosomal function
Source: eLife. 2020 Mar 16;9:e54712. doi: 10.7554/eLife.54712 (PMC7108868; doi:10.7554/eLife.54712)
Supplement: Figure 2—figure supplement 1—source data 1. [file elife-54712-fig2-figsupp1-data1.xlsx]

## Sheet: Fig 2 -SI1A
Figure 2 - figure supplement 1A) Dose-response cruves
TPC2-A1-N	Test1	Test2	Test3	Test4	Test5	Test6	Test7	Test8	Test9	Test10	Test11	Test12	mean	SE	n
0.01 (μM)	15	31.4286	33.3333	47.5									31.8155	6.65343	4
0.1 (μM)	70	30	36.6667	70									51.6667	10.6719	4
1 (μM)	82.8571	176.667	250										169.841	48.3705	3
3 (μM)	288.571	250	317.5	103.333									239.851	47.5597	4
10 (μM)	176.667	363.75	61.6667	447.5	247.5	282.857	193	103.333	371.667	246.667	368.367	210	256.081	33.5545	12
TPC2-A1-P	Test1	Test2	Test3	Test4	Test5	Test6	Test7	Test8	Test9	Test10	Test11	Test12	Test13	mean	SE	n
0.01 (μM)	36.6667	28	16											26.8889	5.99176	3
0.1 (μM)	43.3333	27	22											30.7778	6.44157	3
1 (μM)	350	291	390	278										327.25	26.1323	4
3 (μM)	420	402	478											433.333	22.9298	3
10 (μM)	610	490	822.857	308	585	406.667	505	495	366	510	268.571	370	530	482.084	40.3931	13

## Sheet: Fig 2 - SI1B-C
Figure 2 - figure supplement 1B) Normalized outward Na current
	Test1	Test2	Test3	Test4	Test5	Test6	Test7	Test8	Test9	Test10	mean	SE	n
WT TPC2-A1-N	5.37736	4.58238	10	3.6	8.9685	2.67347	2.79167	3.81272	8.16667		5.55253	0.928	9
WT TPC2-A1-P	2.4843	1.3838	8.45833	4.16667	10.1429	1.93719	10.7368	3.18438	2.40909	5.62162	5.05251	1.1114	10
L265P TPC2-A1-N	0.73913	0.62857	0.42308	0.95918							0.68749	0.11175	4
L265P TPC2-A1-P	0.96262	0.87234	1								0.94499	0.03789	3
Figure 2 - figure supplement 1C) Normalized outward Ca current
	Test1	Test2	Test3	Test4	Test5	Test6	Test7	Test8	Test9	Test10	mean	SE	n
WT TPC2-A1-N	2.25	3.96226	5.75	2.5	2.78261	1.36842	1.57143	2.175	1.75		2.67886	0.46197	9
WT TPC2-A1-P	1.096	1.09184	1.14286	1.25	1.88	1.14286	1.18182	1.47312	1.28571	1.83333	1.33775	0.09355	10
L265P TPC2-A1-N	0.5	0.67619	0.5	1							0.66905	0.11788	4
L265P TPC2-A1-P	0.95455	1	1								0.98485	0.01515	3
