# Supplementary material for: Agonist-mediated switching of ion selectivity in TPC2 differentially promotes lysosomal function
Source: eLife. 2020 Mar 16;9:e54712. doi: 10.7554/eLife.54712 (PMC7108868; doi:10.7554/eLife.54712)
Supplement: Figure 2—source data 1. [file elife-54712-fig2-data1.xlsx]

## Sheet: Fig 2 E-G
Fig.2E Statistical analysis of current densities (CD; mean ± SEM) recorded at -100 mV for endo-lysosomes expressing TPC2 WT or TPC2 M484L activating by TPC2-A1-N
	Test1	Test2	Test3	Test4	Test5	Test 6	mean	SEM	n
TPC2 WT Basal	‭214,375‬	21.6667	32.5	17.5	47.1429	10	57.2	31.88	6
TPC2 WT TPC2-A1-N	363.75	61.6667	447.5	247.5	282.857	193	266	54.83	6
TPC2 M484L Basal	100	91.6667	89				93.55	4.167	2
TPC2 M484L TPC2-A1-N	445	500	476				473.7	27.5	2
Fig.2F Statistical analysis of current densities (CD; mean ± SEM) recorded at -100 mV for endo-lysosomes expressing TPC2 WT or TPC2 M484L activating by TPC2-A1-P
	Test1	Test2	Test3	Test4	Test5	Test 6	Test7	Test 8	mean	SEM	n
TPC2 WT Basal	52	112.5	58.3333	70	45	20	107.5	14.2857	59.95	12.74	8
TPC2 WT TPC2-A1-P	308	585	406.667	505	495	366	510	268.571	430.5	39.16	8
TPC2 M484L Basal	44	145	71.6667						86.89	30.13	3
TPC2 M484L TPC2-A1-P	1172	1025	1086.67						1095	42.62	3
Fig. 2G Fold-change in current evoked by TPC2-A1-P versus TPC2-A1-N in the two variants of TPC2 WT and TPC2 M484L
TPC2-A1-P current in TPC2 WT / Average of TPC2-A1-N current in TPC2 WT
Test1	Test2	Test3	Test4	Test5	Test 6	Test7	Test 8	mean	SEM	n
1.1577	2.19887	1.52856	1.89817	1.86058	1.3757	1.91696	1.00949	1.618	0.1472	8
TPC2-A1-P current in TPC2 M484L / Average of TPC2-A1-N current in TPC2 M484L
Test1	Test2	Test3	mean	SEM	n
2.4717	2.16169	2.29174	2.308	0.08988	3

## Sheet: Fig 2 J
Fig. 2J effect of removing extracellular Na+ on TPC2-A1-N and TPC2-A1-P action in cells expressing TPC2 (LLAA)
TPC2-A1-N (µM)	30
						mean	SE	n
156mM Na+	1.65551	1.39851	1.23831			1.43077	0.121511	3
0 Na+	1.10769	1.29741	1.29092	0.934042		1.15752	0.0865017	4
TPC2-A1-P (µM)	60
						mean	SE	n
156mM Na+	1.56109	1.10946	0.581563			1.08404	0.283051	3
0 Na+	2.56085	2.15066	1.79616			2.16923	0.220942	3

## Sheet: Fig 2 P-Q
Fig. 2P Reversal potentials of agonists
I+100mV/I-100mV
	Test1	Test2	Test3	Test4	Test5	Test6	Test7	Test8	Test9	Test10	mean	SE	n
TPC2-A1-N	-17	-12.6	-7.4	-5	-21.4	5.8	-5.8	-26.6	-19		-12.1111	3.33585	9
TPC2-A1-P	-63.4	-73	-77.8	-72.6	-46.6	-59.4	-49.4	-53.8	-65.4	-48.2	-60.96	3.56848	10
NAADP	-18.2	-10.6	-1	-4.2							-8.5	3.79956	4
PI(3,5)P2	-55.8	-57.4	-45.4	-54.6							-53.3	2.69506	4
Fig. 2Q Pca/Pna of agonists
	Test1	Test2	Test3	Test4	Test5	Test6	Test7	Test8	Test9	Test10	mean	SE	n
TPC2-A1-N	0.42708	0.5399	0.71869	0.82292	0.3401	1.5555	0.78641	0.26195	0.38478		0.64859	0.13186	9
TPC2-A1-P	0.04958	0.03321	0.02726	0.03377	0.10266	0.05876	0.09066	0.07478	0.04558	0.09561	0.06119	0.00884	10
NAADP	0.40111	0.60197	1.03635	0.86134							0.72519	0.14011	4
PI(3,5)P2	0.06857	0.06401	0.10832	0.07223							0.07828	0.01015	4
