# Supplementary material for: Agonist-mediated switching of ion selectivity in TPC2 differentially promotes lysosomal function
Source: eLife. 2020 Mar 16;9:e54712. doi: 10.7554/eLife.54712 (PMC7108868; doi:10.7554/eLife.54712)
Supplement: Figure 3—source data 1. [file elife-54712-fig3-data1.xlsx]

## Sheet: Fig 3 C, E, G
Fig. 3C TPC2-A1-N and TPC2-A1-P action in cells expressing TPC2 (LLAA) or expressing TPC2 (LLAA, K204A)
TPC2-A1-N (µM)	10
									mean	SE	n
TPC2 (LLAA)	0.187423	0.3342	0.284035	0.380631	0.564234				0.350105	0.0623966	5
TPC2 (LLAA, K204A)	0.404556	0.213192	0.2498	0.817681					0.421307	0.13848	4
TPC2-A1-P (µM)	30
									mean	SE	n
TPC2 (LLAA)	0.926877	0.755499	0.298757	0.57927	0.32952	0.66001	0.847272		0.628172	0.0918791	7
TPC2 (LLAA, K204A)	0.486054	0.254058	0.483512	0.144237	0.430994	0.137594			0.322741	0.0671063	6
Fig. 3E TPC2-A1-N action in cells expressing TPC2 GCaMP6s or expressing TPC2 K204A GCaMP6s
TPC2-A1-N (µM)	30
									mean	SE	n
TPC2 GCaMP6s	0.874478	1.38118	1.27766	1.26131					1.19866	0.11127	4
TPC2 K204A GCaMP6s	1.63299	1.43724	0.751681	0.947655					1.19239	0.205792	4
Fig. 3G TPC2-A1-P action in cells expressing TPC2 GCaMP6s or expressing TPC2 K204A GCaMP6s
TPC2-A1-P (µM)	60
									mean	SE	n
TPC2 GCaMP6s	0.277287	0.433306	0.258682	0.707714	0.466768				0.428751	0.0809788	5
TPC2 K204A GCaMP6s	0.00991185	0.355355	0.144375	0.0263545	0.269314				0.161062	0.067357	5

## Sheet: Fig 3 J
Fig. 3J Statistical analysis of current densities (CD; mean ± SEM) recorded at -100 mV for endolysosomes expressing TPC2 or TPC2K204A activating by TPC2-A1-N or TPC2-A1-P
	Test1	Test2	Test3	Test4	Test5	Test 6	Test7	Test 8	mean	SEM	n
TPC2-A1-N on hTPC2 WT	363.75	61.6667	447.5	247.5	282.857	193			266	54.83	6
TPC2-A1-N on hTPC2 K204A	207	317	259						261	55	2
TPC2-A1-P on hTPC2 WT	308	585	406.667	505	495	366	510	268.571	430.5	39.16	8
TPC2-A1-P on hTPC2 K204A	148	180	168						165.3	16	2
