# Supplementary material for: Agonist-mediated switching of ion selectivity in TPC2 differentially promotes lysosomal function
Source: eLife. 2020 Mar 16;9:e54712. doi: 10.7554/eLife.54712 (PMC7108868; doi:10.7554/eLife.54712)
Supplement: Figure 4—source data 1. [file elife-54712-fig4-data1.xlsx]

## Sheet: Fig 4 C-E
	Fig. 4C Ratio curves of pH-Lemon-GPI expressed in control HeLa cells																					Fig. 4D HeLa cells co-expressing wild-type TPC2-mCherry																Fig. 4E HeLa cells co-expressing TPC2 L265P -mCherry
	Control + TPC1-A1-N																					TPC2wt + TPC2-A1-N																TPC2L265P + TPC2-A1-N
Time (min)	cell 01	cell 02	cell 03	cell 04	cell 05	cell 06	cell 07	cell 08	cell 09	cell 10	cell 11	cell 12	cell 13	cell 14	cell 15	cell 16		Average	SEM			cell01	cell02	cell03	cell04	cell05	cell06	cell07	cell08	cell09	cell10	cell11	cell12		Average	SEM		cell01	cell02	cell03	cell04	cell05	cell06	cell07	cell08	cell09	cell10	cell11
0	1.00537	1.00701	1.01078	0.996648	1.00726	1.01122	1.01368	1.00383	1.0045	1.00411	1.00463	0.998917	1.00337	0.995901	0.994657	1.00254		1.00403	0.00136813			1.0027	0.991038	0.999156	0.997158	1.00114	0.9918	0.998449	1.01016	0.981529	0.995377	1.00255	1.00364		0.997892	0.00213131		0.998689	1.00342	0.997842	0.997417	0.997211	0.997136	1.00169	0.998512	1.00098	0.998358	0.997824
0.00803333	1.00789	1.00596	1.0117	0.99739	1.00767	1.0174	1.01623	1.00413	0.998854	1.00099	1.00401	0.996843	0.997736	0.994242	0.996264	1.01354		1.00443	0.00186381			1.00012	0.990913	0.999573	0.997189	1.00194	0.995238	0.999178	1.00711	0.983825	0.999817	1.00634	1.00887		0.999176	0.00202402		1.00663	1.00433	1.00036	1.00185	0.999447	0.997683	0.999516	1.00015	0.998513	0.998069	1.00299
0.0160667	1.00808	1.00411	1.0108	0.99614	1.0058	1.01318	1.01454	1.00582	1.00239	1.00209	1.00392	0.9978	0.998036	0.995382	0.994615	1.01654		1.00433	0.00173763			1.00031	0.996846	0.998423	0.996146	1.0018	0.997124	0.997164	0.999039	0.98173	1.00062	1.00324	1.00754		0.998332	0.00177526		1.00148	1.00416	0.998438	0.998467	0.995269	0.996045	1.00143	1.00123	1.00019	0.99825	1.00014
0.0241	1.00717	1.00624	1.01112	0.999816	1.0017	1.01228	1.00656	1.00362	1.00239	1.00293	1.00426	1.00201	1.00259	0.994941	0.999873	1.01218		1.00435	0.00118562			0.998735	0.99589	0.99861	0.996309	1.0019	0.995652	0.999492	1.00298	0.978609	0.99724	1.00053	1.00353		0.997456	0.00187883		1.00066	1.0047	1.00002	1.00188	0.998337	0.99613	0.99865	0.997077	1.00275	1.00095	1.00182
0.0321333	1.00681	1.00487	1.01472	0.99517	0.998286	1.01005	1.00632	1.00206	0.998067	0.99972	1.0027	0.999296	0.998671	0.994239	0.991366	1.00951		1.00199	0.00158974			0.999798	0.99525	1.00116	0.998296	1.00173	0.999033	0.992733	1.00156	0.979875	0.999968	1.00157	1.00446		0.997953	0.0018731		1.00526	1.00665	1.00301	0.999262	1.00241	0.998493	0.99717	1.00054	1.00177	1.00307	1.00017
0.0401667	1.00609	1.00752	1.01237	1.00163	1.00935	1.01642	1.01369	1.00772	1.0027	0.999138	1.00238	1.00232	1.00174	0.996848	0.997547	1.01449		1.00575	0.00154492			0.998945	0.989215	0.998229	0.99054	1.00035	0.993173	0.995288	1.00582	0.979777	0.998469	1.00328	1.00173		0.996235	0.00207405		1.00148	1.00501	0.999528	1.00133	0.999327	0.998412	0.999712	0.994865	1.00353	0.997742	0.998601
0.0482	1.00653	1.00395	1.01117	0.996948	1.00649	1.01953	1.0116	1.00475	1.00017	1.00163	0.999983	0.990925	0.998943	0.998445	0.996156	1.01197		1.0037	0.00182662			0.999978	0.995416	0.996542	0.995355	1.00042	0.995173	1.0043	1.0047	0.980305	0.996209	1.00255	1.00427		0.997935	0.00193533		1.00754	1.00817	1.00258	1.00555	1.00162	0.993004	0.998357	0.998856	1.00151	1.00078	1.00391
0.0562333	1.00688	1.00519	1.01424	0.997639	1.00565	1.0146	1.00759	1.00379	1.00101	0.998803	1.00505	0.995937	0.997306	0.997829	0.996812	1.01768		1.00412	0.00171587			0.99876	0.998418	1.0002	0.995524	1.00222	0.996904	0.998623	1.00314	0.977915	0.997159	1.00241	1.00477		0.998004	0.00199793		1.00096	1.00423	1.00026	1.00042	1.00015	0.99525	1.00042	0.998135	0.999913	1.0017	0.997942
0.0642667	1.00558	1.00652	1.01302	0.996824	1.00851	1.02311	1.01235	1.00442	1.00192	0.99902	1.00018	0.994334	1.00111	0.998275	0.998924	1.02164		1.00536	0.00212399			0.996855	0.997322	1.00001	0.999085	0.999386	0.998042	0.997469	1.00296	0.977749	0.993459	1.00198	1.00234		0.997222	0.00193054		1.00363	1.00776	0.999653	1.0008	1.00274	0.998623	1.00036	0.99937	1.00059	1.00094	1.00049
0.0723	1.00415	1.00217	1.0111	0.997115	1.0021	1.0148	1.00744	1.00339	0.99956	0.99856	1.00376	0.997895	1.00191	0.998501	1.00155	1.01975		1.00398	0.0015929			0.997371	0.994549	1.00112	0.997109	0.996119	0.992347	1.00055	1.00007	0.977015	0.996014	0.999787	1.00229		0.996195	0.00193838		1.0033	1.00667	0.999193	1.00127	1.00198	0.998468	0.998974	0.996105	0.998884	1.00048	0.999638
0.0803333	1.00566	1.00465	1.00935	0.993252	1.00501	1.01503	1.00767	1.00391	0.996389	0.996951	1.00338	1.00148	1.00094	0.996324	0.998468	1.0177		1.00351	0.00168423			1.00087	0.997684	1.00023	0.9949	1.00409	0.997128	1.0029	1.00341	0.981	0.997452	1.00141	1.0027		0.998647	0.00180901		1.00635	1.00635	1.00269	1.00101	1.00204	0.994846	0.999479	1.00429	1.00355	1.00313	1.00201
0.0883667	1.00667	1.0027	1.00819	0.997599	1.00795	1.01365	1.00201	1.00497	0.998916	1.00015	1.00229	0.996239	0.999884	0.999087	0.996486	1.02075		1.0036	0.00165876			1.00045	0.995805	1.00094	0.993872	1.00368	0.996853	1.00161	1.00423	0.979135	0.997966	0.999258	1.00036		0.997847	0.00191632		1.00428	1.00688	1.00496	1.00282	1.00323	0.99465	0.998173	0.996804	1.00385	1.00313	1.00402
0.0964	1.0065	0.998935	1.01027	0.994221	1.00896	1.01399	1.00662	1.00325	0.99767	0.996944	0.997146	0.990514	0.997511	0.998435	0.992752	1.01995		1.0021	0.00205536			1.00127	0.999436	0.999586	0.997442	1.00165	0.997302	1.00542	1.00114	0.978861	0.99798	0.998016	0.99954		0.998136	0.00187231		1.00353	1.00233	1.00149	1.00458	1.00352	0.994409	0.995565	0.995055	1.0016	0.999578	1.00054
0.104433	1.00884	1.00167	1.00841	0.99684	1.00015	1.0174	1.0046	1.00404	0.998797	0.997915	1.00536	0.995943	1.00192	1.00315	0.993817	1.02272		1.00385	0.00191904			1.00032	0.993231	0.997392	0.996604	1.001	0.992539	1.00755	1.00172	0.979016	0.995473	0.9987	1.00039		0.996995	0.00201343		1.00091	1.00581	0.998525	0.997524	0.999213	0.995207	0.99804	0.995075	0.999429	1.00173	0.998066
0.112467	1.00609	1.00205	1.00712	0.997034	1.00595	1.01205	1.0022	1.0036	0.997247	0.999077	1.00132	0.994879	0.999227	1.0021	0.99406	1.02148		1.00284	0.00171763			1.00125	0.992601	0.999009	0.993302	1.00046	0.994536	1.00103	1.00057	0.978973	0.996783	0.998196	1.00191		0.996552	0.00184709		1.00173	1.00553	1.00069	1.00202	1.00344	1.0002	0.997008	0.998527	1.00038	1.00225	0.998242
0.1205	1.00277	1.00036	1.00943	0.993634	1.00755	1.01389	1.00842	1.00311	0.997452	1.00071	1.00573	0.995339	0.997073	0.999468	0.993504	1.02103		1.00309	0.00190357			1.00112	0.99286	1.00023	0.996998	1.00277	0.997948	1.0042	1.00574	0.976489	0.995308	0.996401	0.997974		0.997336	0.00218541		1.00233	1.00483	1.00044	1.00067	0.999978	0.996288	0.998692	0.999297	0.999628	1.00032	0.999405
0.128533	1.00534	0.999778	1.00769	0.995208	1.00828	1.01406	1.00895	1.00549	0.996664	0.996385	1.00615	0.99448	1.00068	0.999065	0.996011	1.02261		1.00355	0.00194315			1.00035	0.995407	1.00073	0.994223	1.00174	0.994485	1.00182	1.00525	0.97786	0.997249	0.997997	0.999287		0.9972	0.00199922		1.00311	1.00665	1.00038	1.0019	1.00242	0.995195	0.996325	0.997136	0.999677	1.00299	0.997055
0.136567	1.00714	0.997422	1.0077	0.992898	1.00515	1.01301	1.00724	1.00137	1.00006	0.998447	1.008	0.993212	1.00166	0.999044	0.999216	1.02901		1.00379	0.00218549			1.00054	0.995191	0.999083	0.9976	1.00066	0.99948	1.00278	0.999347	0.977745	0.998933	0.99782	0.999879		0.997422	0.00186746		1.00091	1.00307	1.00141	1.00382	1.00127	0.993568	0.99803	0.999489	0.999683	1.00192	1.00059
0.1446	1.0062	1.00407	1.00706	0.995564	1.0109	1.0121	1.0087	1.0046	0.997395	0.998294	1.00382	0.996616	1.00305	0.998787	0.990557	1.02517		1.00393	0.00205022			1.00041	0.995956	0.999375	0.99514	0.998683	0.993392	1.00481	0.999705	0.983402	0.996972	0.999735	1.00119		0.997398	0.00154238		1.00093	1.00321	1.00024	1.00056	0.99936	0.99706	0.995049	0.999649	1.00272	1.00067	0.997603
0.152633	1.00478	0.996671	1.01078	0.992739	1.01153	1.01182	1.00613	1.00364	1.00421	0.999001	1.00134	0.996274	1.00047	1.00061	0.996061	1.02641		1.0039	0.00207211			1.00196	0.992617	0.997859	0.997003	1.00202	0.996401	1.00024	1.00225	0.97986	0.994965	0.998606	0.996795		0.996715	0.00175767		1.00031	1.00327	1.00094	1.00147	1.00102	0.996516	0.99429	0.995191	1.00038	1.00014	0.997919
0.160667	1.00516	1.00186	1.01092	0.993656	1.00986	1.00821	1.00618	1.00589	0.997793	0.999266	0.998127	0.996441	1.00086	0.999032	0.99481	1.0272		1.00345	0.00206768			1.00307	1	0.998558	1.00061	1.00056	0.994839	1.00192	0.997252	0.977767	0.995791	0.998322	0.998673		0.997279	0.00190258		1.00057	1.00117	0.997248	1.00216	1.00145	0.994946	0.994673	0.996673	1.00006	1.00014	0.998799
0.1687	1.00302	1.00355	1.00948	0.995127	1.00923	1.01222	1.00912	1.00384	0.998881	0.99948	0.997553	0.993215	0.997891	0.998817	0.998671	1.03764		1.00423	0.00262912			1.00024	0.997364	0.997804	0.996595	1.00256	0.995599	1.00544	0.999847	0.980027	0.995857	0.99756	0.997325		0.997185	0.001769		1.00117	1.00388	0.997975	1.0003	0.999276	0.99175	0.993309	1.00093	0.998801	0.997714	0.998585
0.176733	1.00655	0.999393	1.00706	0.996785	1.01024	1.01156	1.01064	1.00602	0.997591	0.996771	1.00175	0.993853	1.00374	0.999843	0.997195	1.03451		1.00459	0.00243545			1.00005	0.994751	1.0024	0.994543	1.00039	0.994956	1.00239	1.00047	0.978619	0.99563	0.99878	0.997235		0.996685	0.0018426		0.999851	1.00687	0.996136	0.998718	0.996526	0.992271	0.993584	0.999294	0.999445	1.0009	0.998126
0.184767	1.00575	1.00127	1.00755	0.998317	1.00787	1.0095	1.0062	1.00394	0.994353	0.9992	1.00268	0.994247	1.00384	1.00374	0.997523	1.02843		1.00402	0.00199726			1.00129	0.994878	1.00096	0.997467	1.00036	0.996724	1.00205	1.00287	0.978207	0.994737	0.997042	0.999795		0.997198	0.00189844		0.99914	1.0029	0.999868	1.00041	1.00188	0.994193	0.994174	0.997089	1.00042	0.998386	1.0009
0.1928	1.00301	0.999483	1.00596	0.998333	1.00655	1.01422	1.00786	1.00466	0.995754	0.994904	0.999524	0.992267	1.00184	1.00523	1.00204	1.0334		1.00406	0.00238615			1.00164	0.99772	1.0011	0.999327	1.0014	0.998486	1.00399	1.00006	0.978964	0.995873	0.996656	1.00338		0.998217	0.00189445		0.998145	1.00415	0.996923	1.0019	1.00025	0.992757	0.994136	0.997463	1.00063	1.00232	0.998991
0.200833	1.0048	1.00039	1.00216	0.99515	1.00722	1.00946	1.00818	1.00539	0.99681	0.998391	1.00132	0.992514	1.00218	1.00304	0.99223	1.03112		1.00315	0.00227642			1.00222	0.991758	0.999436	0.996795	1.0001	0.993334	1.00436	0.999994	0.980029	0.999971	0.99578	1.0033		0.997256	0.00191483		0.999748	1.00852	0.999203	0.999228	1.00092	0.994435	0.996484	1.00208	1.00094	1.00457	0.999454
0.208867	1.00374	1.0031	1.01029	0.998501	1.00906	1.01245	1.00732	1.00517	0.99645	0.995298	0.999343	0.992089	1.00103	1.0088	0.995576	1.03188		1.00438	0.0023751			1.00124	0.996424	0.999523	0.998161	1.00069	0.997857	1.00398	0.999952	0.976413	0.996585	0.996766	1.00129		0.997407	0.00201946		0.997035	1.00778	0.999244	0.999914	1.00165	0.996486	0.998088	1.00282	0.998819	1.00164	0.99725
0.2169	1.00546	1.00279	1.01057	0.997787	1.01089	1.00758	1.00952	1.00516	0.996639	0.993784	1.00179	0.995423	1.002	1.00546	0.993437	1.03529		1.0046	0.00250466			1.00277	0.996828	0.999314	0.999228	0.998586	1.00135	1.00527	0.998688	0.978487	0.997706	1.00052	1.00358		0.998527	0.00196041		0.997811	1.00615	0.999077	1.00369	0.998694	0.997217	0.99692	0.995169	0.998403	1.00175	0.998193
0.224933	1.00527	0.999977	1.01134	0.998029	1.00913	1.0084	1.00609	1.00445	0.996583	0.9942	0.998598	0.991799	0.998633	1.00592	0.997593	1.02806		1.00338	0.00217261			1.00136	0.996266	0.998648	0.999972	0.999241	0.991349	1.00612	1.00249	0.980885	1.00171	1.00079	1.00093		0.998314	0.00189165		0.99925	1.00733	0.999011	1.00014	0.998119	0.994165	0.997537	1.00205	0.9983	0.997326	1.00145
0.232967	0.999905	0.999049	1.00655	0.995679	1.00991	1.00688	1.00853	1.00557	0.998917	0.996554	1.00122	0.994439	1.00181	1.00484	0.993414	1.02306		1.0029	0.00185405			1.00088	0.989691	1.00134	1.001	1.00096	0.995716	1.00095	1.0015	0.981921	0.999309	0.997161	1.0021		0.997711	0.00176066		0.999596	1.00688	0.99756	1.00044	0.99794	0.994101	0.993396	0.997607	1.00007	0.999215	0.99815
0.241	1.00472	1.00035	1.00682	0.995514	1.00622	1.00728	1.00448	1.00415	0.997515	0.995141	0.994251	0.988714	0.998139	1.00354	0.995194	1.02333		1.00158	0.00199081			1.00099	1.00151	0.998751	0.9983	1.00027	0.999722	1.00166	1.00082	0.977897	0.997855	0.994045	1.00134		0.997763	0.00191014		0.999297	1.00545	1.00171	0.999571	0.998597	0.999172	0.99442	0.99835	0.999556	0.99905	0.998502
0.249033	1.00297	1.00124	1.00721	0.99629	1.01204	1.01053	1.01048	1.00774	0.99186	0.995521	1.0014	0.992883	0.99977	1.00458	0.99565	1.02207		1.00326	0.00203829			0.999474	0.997041	0.997689	0.997476	0.99913	0.991557	1.00872	0.996071	0.979772	0.998502	0.997626	1.00244		0.997125	0.00196201		0.99412	1.00502	0.994308	1.00115	0.995928	0.996343	0.99542	0.995976	0.998464	1.00144	0.99903
0.257067	1.0044	0.999685	1.00533	0.996374	1.00841	1.00598	1.00224	1.00468	0.996862	0.993379	1.00252	0.994555	1.0052	0.998009	0.99448	1.02258		1.00217	0.00180292			1.0027	0.994227	1.00039	0.996357	0.999254	0.997474	0.999828	0.999532	0.981024	0.996894	0.997343	0.997631		0.996888	0.00157501		0.999862	1.00901	0.999059	0.998411	0.999451	0.996541	0.998393	1.00172	1.00005	1.00208	0.999998
0.2651	1.00246	0.999199	1.00824	0.998787	1.00862	1.00422	1.00487	1.00573	0.996282	0.99495	1.00299	0.991762	0.997309	1.00094	0.999694	1.01894		1.00219	0.00162199			1.00088	0.999235	0.999754	0.995733	1.00069	1.00088	1.01183	0.996717	0.978536	0.997501	0.996771	1.00242		0.998412	0.00217524		1.00099	1.00994	0.999271	1.00203	1.00152	0.993924	0.99236	0.9971	0.999933	1.00392	0.999717
0.273133	1.00538	1.0043	1.009	0.996895	1.00524	1.00232	1.00162	1.00419	0.995122	0.994078	1.00142	0.990105	1.00205	0.99623	0.999158	1.01892		1.00163	0.00168915			0.998932	0.995155	0.999971	0.996647	0.999922	0.999048	1.00762	1.00656	0.979191	0.998868	1.00062	0.999437		0.998497	0.00203325		0.996591	1.01004	0.998786	1.00189	0.998703	0.994807	0.995065	1.00006	1.00271	1.00642	0.999854
0.281167	1.00326	1.00246	1.01312	0.998015	1.00814	1.00485	1.00403	1.0055	0.998606	0.995592	0.998934	0.98257	0.99951	1.00442	0.996212	1.0259		1.00257	0.00228624			0.999461	0.999126	0.997742	0.997246	0.998444	0.992587	1.00276	0.997661	0.981433	0.99868	0.999642	1.0042		0.997415	0.00167033		0.999342	1.0085	1.00032	1.00387	1.00091	0.99234	0.987947	0.998104	0.998272	1.00044	0.999656
0.2892	1.00334	1.00489	1.01131	0.995316	1.00761	1.00467	1.00645	1.0062	0.998857	0.996197	1.00296	0.991269	1.00295	1.00112	1.00189	1.01889		1.00337	0.00162528			1.00062	0.999984	1.00151	0.996861	0.997687	0.992048	1.00565	1.0054	0.976691	0.99786	0.996067	0.998862		0.997436	0.00218114		0.991766	1.0045	0.998996	0.997257	0.994924	0.997696	0.99612	0.996239	1.00313	1.00394	1.00147
0.297233	1.0029	0.999254	1.01038	0.999796	1.00046	0.998491	0.999381	1.0038	0.995402	0.994169	1.00209	0.99039	0.997163	1.00282	1.00192	1.02211		1.00128	0.00178882			1.00116	1.0008	0.998869	0.996561	0.996204	0.994467	1.00234	1.00163	0.977738	0.997131	0.995255	0.997315		0.996622	0.00187656		0.997914	1.01077	1.00015	1.0023	0.998201	1.00223	0.995267	0.997855	1.00086	1.00287	0.998964
0.305267	0.998709	0.999994	1.00684	0.997572	1.00585	0.997788	1.00173	1.00382	0.994698	0.993546	1.00494	0.992494	1.00178	0.996554	0.997341	1.01587		1.0006	0.00148594			1.00374	1.00218	0.996021	0.993298	0.99798	0.992897	1.01026	1.00292	0.979132	0.998416	0.997935	0.997607		0.997698	0.00218849		0.994923	1.00682	0.999468	1.00048	0.997073	0.997501	0.994219	0.999801	1.00246	1.00232	0.999798
0.3133	1.00287	1.00195	1.01149	0.999321	1.00359	0.997952	1.00315	1.00297	0.99786	0.995284	1.00143	0.992561	0.999917	1.00147	0.999538	1.01138		1.00142	0.00123169			0.998889	1.00232	1.00192	0.996755	0.997354	0.993389	1.0092	1.00782	0.980212	0.998032	0.993748	0.998189		0.998153	0.00215705		0.99624	1.01092	1.00091	1.00221	0.998485	0.9926	0.989772	1.00025	0.996401	1.00445	0.997739
0.321333	1.00375	1.00349	1.00764	0.999638	1.00062	0.999278	0.998975	1.00402	0.996378	0.997309	0.997829	0.988487	0.99995	1.00164	1.00029	1.0081		1.00046	0.0011644			0.997042	1.00027	1.00148	0.996067	0.997725	0.993301	1.00697	1.0036	0.98014	0.99626	0.999273	1.00084		0.997747	0.00192035		0.996225	1.0063	0.994325	0.997324	0.998774	0.994221	0.993566	0.998698	0.997839	0.997109	0.999617
0.329367	1.00208	0.997148	1.00613	0.991844	1.00368	1.0016	1.00238	1.00443	0.997057	0.997499	1.00188	0.995342	1.00429	1.00215	0.998853	1.00321		1.0006	0.000972471			1.00096	1.0011	0.999569	0.996988	1.00071	0.999713	1.00805	0.998368	0.979571	0.997042	0.999424	0.999043		0.998378	0.00189758		0.991815	1.00628	0.99706	1.00134	0.996432	0.992757	0.994732	0.998598	1.00317	1.00003	0.997055
0.3374	1.00463	0.99999	1.00838	0.996643	1.00221	1.0008	1.00192	1.003	0.996326	0.99534	1.0034	0.992519	1.00367	1.00248	1.00457	1.00877		1.00154	0.00112397			0.999068	0.999527	1.00064	0.999128	1.00108	0.996126	1.00202	1.00108	0.980736	0.999736	0.998497	0.999172		0.998068	0.0016353		0.996031	1.00962	0.999287	0.999528	0.998154	0.994857	0.999507	0.99772	1.00002	1.00131	0.997386
0.345433	1.00388	1.00319	1.01132	0.998076	1.00854	1.00685	1.00521	1.00415	0.996656	0.997922	0.999543	0.992542	0.999333	1.00327	0.997579	0.99921		1.00171	0.00123139			1.00086	0.99684	0.998682	0.996999	0.997775	0.993736	1.00872	0.997419	0.981063	0.998085	0.998709	0.998933		0.997318	0.00179878		0.998591	1.00897	1.00116	0.999929	1.00004	0.997609	0.997883	1.0018	1.00226	1.00406	0.997484
0.353467	1.00178	0.997299	1.00795	0.996443	1.00459	0.999958	1.0037	1.00347	0.997474	0.993645	1.00225	0.994356	1.00104	1.00343	0.997129	1.00559		1.00063	0.00104622			1.0015	1.00601	1.00075	0.995505	0.99654	0.994318	1.00348	1.00118	0.979417	0.998478	0.999671	0.99822		0.997923	0.0019353		0.995825	1.00563	0.998237	1.00069	0.996719	0.995162	0.99245	0.99808	1.00003	0.997204	0.995665
0.3615	1.00297	0.999799	1.0088	0.997865	1.00571	0.998873	1.00899	1.00625	0.997402	0.997727	1.00395	0.994273	1.00417	1.00279	0.995628	1.00377		1.00181	0.00113849			0.998046	1.00378	1.00041	0.989066	0.996067	0.996247	1.0008	1.00343	0.9812	0.996138	0.996225	1.00242		0.996985	0.00186497		0.994453	1.00323	0.995614	1.00015	0.99282	0.993744	0.994745	0.996559	1.00174	1.00111	0.998425
0.369533	1.00084	1.0034	1.00677	0.99812	1.00394	0.996896	0.994883	1.00378	0.993039	0.996505	1.00486	0.998251	1.00641	1.0065	0.999541	1.00439		1.00113	0.00111234			0.997372	1.00065	0.999114	0.986715	0.99507	0.994884	1.00263	1.00121	0.982738	0.998721	0.999245	1.00152		0.996656	0.00176616		0.995152	1.00805	0.998356	0.999639	0.998558	0.995718	0.994484	1.00173	0.999284	0.999801	0.997889
0.377567	1.00003	1.00005	1.00725	0.998138	1.00313	0.999796	1.0003	1.00437	0.997179	0.999555	1.00286	0.994912	1.00419	1.00359	1.00268	1.00121		1.0012	0.000772428			0.997955	1.00367	1.00021	0.995469	0.995802	0.996398	1.00948	1.00051	0.979156	0.996302	0.992783	0.998787		0.99721	0.00207297		0.996236	1.00662	0.999916	1.00056	0.999297	0.996995	1.00036	0.99738	0.998752	0.996958	0.997642
0.3856	1.00321	1.00381	1.00793	0.996508	1.00523	1.00152	1.00129	1.00492	0.994604	0.995264	1.00365	0.995904	1.00105	1.00157	0.998491	1.00061		1.00097	0.000974989			0.999214	0.998462	1.00169	0.995305	0.996643	0.999224	1.00576	1.00151	0.982765	0.99688	0.997246	0.999844		0.997878	0.00159436		0.997211	1.00793	0.998251	1.00076	0.996249	0.998184	0.997074	0.997499	1.00101	0.997364	0.996344
0.393633	1.00196	0.999171	1.00731	0.993221	1.00408	1.00284	1.00175	1.00351	0.996837	0.996028	1.00595	0.996812	1.0053	1.00081	1.00343	1.00005		1.00119	0.00098551			0.998764	1.00124	1.00158	0.995902	1.00028	0.993847	1.00724	1.00224	0.98226	0.997621	0.998667	1.00108		0.998393	0.0017625		0.997408	1.01068	1.00331	1.00237	1.00035	0.994759	0.995987	0.996282	1.00108	1.00261	0.999864
0.401667	1.00298	0.999525	1.00916	0.999177	1.00147	0.999168	0.996175	1.00169	0.996864	0.998041	1.00113	0.994169	1.00431	1.0014	0.998687	0.997453		1.00009	0.000893408			0.998069	1.00502	1.00328	0.996189	0.995929	0.998684	1.0016	1.00276	0.982598	1.00011	0.99836	1.00096		0.998629	0.00166658		0.998635	1.00501	0.99606	1.0022	0.999591	0.997854	0.998303	1.00056	1.00163	1.00201	0.997868
0.4097	1.00274	1.00006	1.01084	0.99816	1.00114	0.9968	1.00098	1.00375	0.996561	0.997649	1.00291	0.999144	1.00335	1.00209	1.00296	1.00589		1.00156	0.000915886			0.997978	1.00327	1.00165	0.997266	0.996987	0.994616	1.00172	1.00165	0.982239	0.997802	0.995583	0.999077		0.997486	0.00158962		0.993612	1.00799	0.997325	0.999777	0.998797	0.996232	0.998417	0.995469	1.00081	1.00118	0.997668
0.417733	1.00345	1.0001	1.01031	0.99788	1.00208	0.996312	0.9964	1.00257	0.995522	0.994648	1.00662	0.994869	1.0048	1.0026	0.999123	1.0054		1.00079	0.00117032			0.997022	1.00503	1.00189	0.998171	0.996938	0.992143	1.00298	1.00284	0.983129	1.00006	0.996534	1.00218		0.998244	0.00172671		0.995668	1.00957	0.998999	0.998598	0.999749	0.995709	0.998199	0.998504	1.00422	1.00188	0.998348
0.425767	1.00546	0.998151	1.00588	0.99337	1.00174	0.999566	0.998598	1.00506	0.997219	0.995307	1.00175	0.996037	1.00578	1.0017	0.998466	1.00257		1.00042	0.000986482			0.9973	1.00338	1.00251	1.00103	0.999694	0.999945	0.996641	0.996276	0.982242	0.999324	0.994357	1.00067		0.99778	0.00160557		0.999244	1.00966	1.00131	1.00142	0.997468	0.997135	0.994373	0.998933	1.00261	1.00612	1.00028
0.4338	1.00424	1.00068	1.0096	0.997449	1.00245	1.00001	1.00214	1.00249	0.99785	0.996988	1.00332	0.997289	1.00581	1.00313	0.996079	1.00545		1.00156	0.000947557			0.998428	1.00409	1.00002	0.997738	0.993933	0.99918	0.999819	1.0057	0.982285	0.998899	0.997789	0.999965		0.998153	0.00168163		0.99396	1.00631	1.00006	1.00134	0.99951	0.997342	0.995271	0.999572	1.00499	0.999452	0.998464
0.441833	1.00022	0.992379	1.00595	0.997975	1.00234	0.998963	0.999587	1.00133	0.998149	0.996054	1.00296	0.994153	1.0055	1.00272	0.999688	0.999595		0.999848	0.000925644			0.999804	1.00241	1.00053	0.996993	0.995817	1.00068	1.00158	0.998961	0.983287	1.00224	0.996635	1.00159		0.998377	0.00151566		0.997994	1.00896	1.00325	1.00438	0.998276	0.997448	0.998696	0.997026	0.99947	1.00195	0.998633
0.449867	1.0027	0.999108	1.01153	1.00027	1.00125	0.996909	1.00073	1.0014	0.997277	0.997468	1.00437	0.99461	1.00354	0.998971	0.99688	1.0044		1.00071	0.00102294			0.997556	0.999581	1.00148	0.998381	0.999502	0.996822	1.00497	1.00143	0.981256	0.998055	0.996372	1.00051		0.997993	0.00167022		0.992655	1.00425	0.996228	0.999249	0.997933	0.996796	0.995747	0.99638	0.998738	1.0023	1.00037
0.4579	1.00297	1.00051	1.01133	1.00226	1.00361	0.999319	1.00045	1.00107	0.994406	0.994141	1.0043	0.993374	1.00773	0.998688	0.999703	1.00344		1.00108	0.00119043			0.998274	1.00251	1.00053	1.00021	0.998968	0.997325	1.00339	1.00165	0.982246	0.999216	0.995112	0.999687		0.99826	0.00159437		0.993643	1.00356	1.00194	1.00113	0.998652	0.99931	0.997607	0.996493	0.998695	0.998645	0.999899
0.465933	1.00642	0.998003	1.00872	0.998521	1.00329	0.999489	0.9999	1.00496	0.994542	0.990991	1.00018	0.996047	1.0039	1.00057	0.99992	1.00331		1.00055	0.00113153			0.995375	0.999926	0.999283	0.998189	1.00137	1.00128	1.002	1.00291	0.986097	0.996381	0.998312	1.0028		0.998659	0.00133895		0.995682	1.00344	1.00139	1.00238	1.00043	0.994379	0.996013	0.99752	1.00088	1.00052	1.00102
0.473967	1.00414	0.9994	1.01159	0.995856	1.00102	0.999908	0.997554	1.00305	0.99918	0.997279	1.00795	0.999595	1.00467	1.00159	1.0045	1.00862		1.00224	0.00110903			0.997065	1.00248	1.00098	1.00018	0.999836	0.999972	0.998346	1.00185	0.981187	0.997583	0.995594	1.00041		0.997958	0.00163128		0.996763	1.00039	0.996583	0.997074	0.996362	0.996465	0.994455	0.993524	1.00103	1.00339	0.997483
0.482	1.00653	1.00096	1.00996	0.99853	1.00882	1.00057	1.00033	1.00387	0.995263	0.994041	0.998738	0.989058	1.00399	0.996503	0.997942	1.00036		1.00034	0.00136638			1.00071	1.00179	1.00127	0.996876	0.998635	0.996579	1.00013	0.998691	0.98203	1.00002	0.997606	0.99817		0.997708	0.00150596		0.99864	1.00636	1.00243	1.00416	1.00142	0.996524	0.996499	0.999521	1.00205	1.0027	1.00127
0.490033	1.00161	0.997567	1.00715	0.997623	1.00006	0.99302	1.01008	1.00094	1.00174	0.994639	1.00343	0.986893	1.00336	0.99883	1.0001	1.00554		1.00016	0.0014065			0.996745	1.00231	1.00009	0.997814	0.994413	0.995852	0.997391	1.00305	0.981596	0.996232	0.992295	0.997281		0.996256	0.00159714		0.993217	1.00175	0.998307	1.00256	0.997821	0.999654	0.995856	0.996363	1.00089	1.00034	1.00144
0.498067	1.00367	0.998116	1.0074	0.996146	0.998787	0.995043	0.994995	1.00403	0.997065	0.995036	1.0031	0.999112	1.00734	1.0033	1.00253	1.00593		1.00072	0.00110974			1.0003	1.00595	1.00011	1.00097	0.997547	0.998268	0.997412	1.00455	0.982611	0.999813	0.99524	0.995683		0.998204	0.00169178		0.993157	1.00036	0.998648	0.996564	0.995958	0.998775	0.995766	0.999797	1.00146	1.00176	0.999642
0.5061	1.00402	0.997964	1.00605	0.998978	1.00169	0.999947	0.999866	1.00346	0.993751	0.99401	0.999985	0.989556	1.00601	1.00215	1.00545	1.00299		1.00037	0.00117967			1.00029	1.00313	1.00099	1.00141	0.99696	0.996787	0.999787	1.00117	0.983551	0.996741	0.996553	1.00082		0.998182	0.0014768		0.997892	1.00522	1.00252	1.00367	1.00222	0.999094	0.995837	0.999197	1.00137	1.00139	1.00149
0.514133	1.00139	1.00123	1.00597	0.996801	0.999696	0.997383	0.997815	1.00221	0.998275	0.995468	1.00564	0.992307	1.0031	1.00252	1.00779	0.998189		1.00036	0.00103726			1.00201	1.00116	0.999625	0.995204	0.996006	0.998525	0.996334	0.999619	0.98309	0.997988	0.991915	0.994375		0.996321	0.00146889		0.997637	1.00498	1.00107	1.0014	0.998499	0.995561	0.996091	0.998828	1.00111	1.0029	1.00162
0.522167	1.00323	1.00084	1.01052	0.9996	0.99933	0.993492	0.991281	1.00074	0.993895	0.995006	1.00469	0.9946	1.00734	1.00004	0.999832	0.999846		0.999642	0.00130157			1.00021	1.00363	1.00118	0.998982	0.996425	1.00096	0.998233	1.00183	0.981434	1.0011	0.995783	0.996952		0.99806	0.0016598		0.996787	1.00229	1.00152	1.00283	0.998564	0.997886	0.996415	0.994148	1.00042	1.00339	1.00125
0.5302	0.998964	0.999803	1.00783	0.994528	1.00546	1.00272	0.999938	1.00455	0.997808	0.99388	1.00141	0.994482	1.00863	1.00222	1.00529	1.00003		1.0011	0.00114251			1.00093	1.00473	0.999364	0.998198	0.99801	0.995539	0.998287	1.00304	0.982022	0.997579	0.991876	0.994824		0.997033	0.00169467		0.995277	1.00398	1.00084	1.00137	0.999681	0.998031	0.99667	1.00255	1.00056	1.00214	0.997822
0.538233	1.00196	0.999599	1.00673	0.997905	1.00313	1.00002	0.994486	1.00356	0.996233	0.994531	1.00085	0.990367	1.00298	1.00384	1.00443	1.00496		1.00035	0.00113682			1.00102	1.00592	1.00005	0.998606	0.997543	0.996955	0.999634	0.998091	0.981914	0.994073	0.994037	0.9987		0.997213	0.00165934		0.992865	1.00483	1.00169	1.00038	1.00048	0.997213	0.998212	0.997008	1.00234	0.998881	0.997653
0.546267	1.002	0.996635	1.00765	0.996209	1.00458	1.00103	0.998247	1.00275	0.997147	0.993704	1.00682	0.995159	1.00544	1.00412	1.00352	1.00421		1.0012	0.00110326			0.998568	1.00585	1.00066	0.999208	0.995459	0.997828	0.994734	1.00035	0.983177	0.994037	0.992934	0.994019		0.996402	0.00160359		0.991631	1.00203	0.99785	1.00278	0.997961	0.999682	0.998793	1.00149	1.00531	0.998666	1.00051
0.5543	1.00253	0.997904	1.00515	0.994945	1.00383	0.997483	0.994547	1.00267	0.996071	0.993503	1.00055	0.990674	1.00122	1.00231	1.00241	1.00438		0.999386	0.00110202			0.998029	1.00907	0.998502	0.999033	0.99547	0.997793	1.00693	1.00203	0.987399	0.997779	0.996548	0.997159		0.998812	0.0015898		0.992399	1.00336	0.99988	1.00213	1.00046	0.998922	0.997077	0.997448	0.999339	1.00377	0.999211
0.562333	1.00244	0.996764	1.0074	0.995576	1.00274	1.00078	0.993821	1.00393	0.999154	0.997323	1.00385	0.995483	1.00453	1.00141	0.998019	0.999951		1.0002	0.00096058			0.998804	1.00545	1.00364	1.00002	0.996156	0.997431	1.00416	0.999603	0.984919	0.998552	0.999209	0.997715		0.998806	0.00151142		0.994402	1.00173	0.998958	0.997657	0.997965	0.997234	0.997508	1.00116	1.00134	1.00202	0.998299
0.570367	1.00154	0.997246	1.00253	0.998474	1.00217	0.998988	0.996101	1.00029	0.999725	0.998417	1.00308	0.99349	1.00425	1.005	0.999901	1.00536		1.00041	0.00082461			0.999928	1.00046	1.00122	1.00066	0.997339	1.00059	1.00284	0.996868	0.983168	0.995875	0.995733	0.995111		0.997483	0.00149208		0.993964	1.00252	0.999192	1.00158	0.996404	0.996471	0.996401	1.00011	1.00284	1.00174	0.997061
0.5784	1.00243	0.998721	1.00509	0.997836	1.00767	1.00669	0.999561	1.0048	0.997929	0.9969	1.00748	1.00262	1.00817	1.00459	1.00338	0.999578		1.00272	0.000964411			0.997754	1.00148	1.00245	0.999155	0.995479	0.997305	1.00649	0.997766	0.98408	0.994491	0.991623	0.996641		0.99706	0.00162917		0.994087	1.00353	1.00108	1.00102	1.00077	1.00089	0.998403	1.00185	1.00011	1.00078	1.00084
0.586433	1.00026	0.997762	1.00483	0.998648	1.00501	1.00609	1.00214	1.00602	0.992979	0.992627	1.01185	0.997731	1.00685	1.00358	0.997641	0.995973		1.00125	0.00135251			0.999796	0.995927	0.997334	0.9999	0.995277	0.995922	1.00497	1.0003	0.981743	0.993246	0.991818	0.992707		0.995746	0.00167287		0.992714	1.00172	0.998702	1.00055	0.997353	0.998861	0.99855	0.999147	1.0005	0.998948	0.998963
0.594467	1.00076	0.996973	1.00527	0.995103	1.0024	1.00447	0.993424	1.00324	0.996633	0.991009	1.00252	0.9924	1.00438	1.00258	0.999748	0.997437		0.999272	0.00115697			0.998982	1.00283	1.0004	1.00298	0.996033	0.996803	0.998245	0.998706	0.986527	0.997219	0.997618	0.997846		0.997849	0.0012088		0.997269	1.003	1.00064	1.00145	0.996733	0.997206	0.995136	0.998875	1.00029	1.00393	1.00055
0.6025	1.0032	0.997225	1.0012	0.992125	1.00767	1.00392	0.994723	1.0044	1.0008	0.995061	1.00678	0.995071	1.00348	1.003	0.999346	0.99408		1.00013	0.00121544			0.999209	1.00179	1.00102	1.00064	0.997931	0.990624	0.99796	0.998342	0.985147	0.995068	0.995338	0.993496		0.99638	0.00139288		0.991064	1.00081	0.997341	0.999713	0.996613	0.997719	0.997167	1.00261	1.00246	1.00243	0.999382
0.610533	1.00144	0.997141	1.00585	0.995136	1.00236	1.0025	0.993048	1.00309	0.998403	0.991573	1.00658	1.00041	1.00761	0.997679	0.997751	0.991096		0.99948	0.00128817			0.997696	1.0073	1.00078	1.00216	0.999216	0.992954	1.00069	1.0001	0.984815	0.996641	0.996236	0.996775		0.997946	0.00158227		0.99498	1.00192	1.00224	1.0025	0.999769	0.998908	0.998938	1.00078	1.00446	1.00198	1.00036
0.618567	1.00106	0.998952	1.00724	0.991425	0.998476	1.0048	0.996019	1.00167	0.997013	0.994552	1.00297	0.996317	1.00143	0.996455	0.999139	0.994462		0.998874	0.00103874			1.00136	1.00298	0.999363	0.99881	0.995289	0.992545	1.00364	0.998811	0.984361	0.996859	0.995805	0.998652		0.997372	0.00149736		0.997319	1.00428	0.999318	1.00051	0.998476	0.995256	0.993768	0.995834	1.0033	1.00153	0.999494
0.6266	1.00326	0.997992	1.00203	0.995112	1.00275	1.00388	0.993917	1.00335	0.999736	0.992967	1.0033	0.993256	1.00503	0.988835	1.00684	1.00187		0.999633	0.00131888			0.995383	1.00598	0.999619	1.0005	0.995667	0.996546	1.00551	1.0034	0.985912	0.99715	0.996749	0.999119		0.998461	0.00155595		0.993953	1.00113	0.999902	1.00128	0.995042	0.99114	0.991306	1.0033	1.0033	1.00019	0.999622
0.634633	1.00209	0.998296	1.00676	0.993096	1.0018	1.00309	0.993111	1.00391	0.996478	0.993783	1.00519	0.994907	1.00426	0.986899	1.00439	0.992093		0.99876	0.00148194			0.998661	1.0057	0.999767	0.999895	0.998531	1.00189	1.00519	1.001	0.98429	0.992764	0.994464	0.998867		0.998418	0.00167211		0.993896	1.00265	1.00021	0.997901	0.997194	0.987039	0.98843	1.00308	1.00219	1.0045	0.998753
0.642667	1.00486	0.999947	1.0101	0.997268	1.00363	1.00614	0.996915	1.003	0.997556	0.995582	1.00872	1.00442	1.00899	0.983814	1.00002	0.993902		1.00093	0.0016955			0.999554	1.0001	1.00034	0.998984	0.99892	0.997907	1.0013	1.00035	0.986049	0.996233	0.995618	0.998551		0.997826	0.00117459		0.993349	1	1.00201	1.00061	0.997455	0.983197	0.984657	0.995961	1.00282	1.00184	0.996561
0.6507	1.0034	1.001	1.00676	0.998057	1.01096	1.00964	1.00258	1.00571	0.995964	0.996353	1.01008	0.997851	1.00555	0.992898	1.00428	0.996782		1.00237	0.0014003			0.997844	1.00269	1.00182	1.00042	1.00104	0.99895	1.00158	1.00062	0.990179	0.99702	0.997476	1.002		0.999303	0.00099354		0.997161	1.00637	1.00408	1.00248	0.999509	0.982264	0.983702	1.00057	1.00336	1.00022	0.996931
0.658733	1.00833	1.00345	1.01056	0.997748	1.00849	1.00338	0.998799	1.00516	0.997844	0.995354	1.00433	0.998123	1.00578	1.0087	1.00271	0.993172		1.00262	0.00130871			1.00028	1.00423	1.00216	0.999201	1.00061	0.995208	1.00236	1.00333	0.983979	0.9925	0.995316	0.996484		0.99797	0.0016537		0.998855	1.00616	1.00008	1.00441	1.00221	0.989646	0.98841	1.001	0.999267	1.00311	1.00119
0.666767	1.00103	0.997747	1.00921	0.997304	1.01167	1.00761	0.99616	1.00611	0.997723	0.99401	1.00578	0.997921	1.0053	1.00369	0.996808	0.988343		1.00103	0.00157326			1.00002	1.00963	1.00281	0.998245	0.998137	0.994139	1.00514	1.00071	0.987732	0.996806	0.99159	0.998518		0.998623	0.00169528		0.995883	1.00253	1.00208	1.00063	0.997091	1.00431	1.0012	1.00274	1.00384	0.998435	1.0003
0.6748	0.999106	0.997005	1.00682	0.994374	1.00776	1.00542	0.999773	1.0056	0.996533	0.99718	1.00989	0.997884	1.0042	1.0041	1.00416	0.991756		1.00135	0.00132562			1.00043	1.0046	1.00124	0.998875	1.00186	0.999092	1.00679	0.996353	0.985676	0.995927	0.992077	0.996484		0.998284	0.00162685		0.994789	1.00249	1.00097	1.00229	0.995494	1.00119	0.998856	1.00036	0.999268	0.999629	0.996826
0.682833	1.00382	0.998609	1.00554	0.999002	0.99934	1.00027	0.992658	0.999933	0.998157	0.993487	1.00593	1.00074	1.00063	1.00699	1.00388	0.991521		1.00003	0.00115516			1.00317	1.00513	1.00124	0.997427	0.99833	0.996478	1.01015	0.999481	0.990075	0.99694	0.997541	1.00419		1.00001	0.00149403		0.990321	1.00008	0.998536	1.00143	0.998035	0.999377	0.997599	1.00353	1.00217	1.00167	1.00123
0.690867	1.00215	0.996328	1.00941	0.998734	1.00591	1.0075	0.995539	1.00071	1.00046	0.999969	1.00676	1.00084	1.00401	1.00582	1.00554	0.993209		1.00205	0.00116472			1.00105	1.00929	0.99949	0.994853	0.997871	0.992682	1.002	1.00261	0.990865	0.998741	0.994935	0.999738		0.998677	0.00143778		0.994152	1.00122	1.00203	1.004	0.995821	0.998773	0.998215	1.00079	1.00438	0.997767	0.998522
0.6989	1.00254	0.996464	1.00667	0.995046	1.00461	1.00528	0.999468	1.00249	0.998306	0.99313	1.00763	1.00302	1.0033	1.00493	1.00261	0.991652		1.00107	0.00121513			0.999908	1.00731	0.999088	1.00168	0.998395	0.998418	1.00315	0.999309	0.988083	0.996347	0.994706	0.996579		0.998581	0.00135827		0.990063	1.00316	1.00302	1.00222	0.99755	0.998342	0.997599	1.00472	1.0044	1.0012	1.00177
0.706933	1.00048	0.998291	1.00617	0.994853	1.00222	1.00578	1.00038	1.00072	1.00045	0.997777	1.00621	0.999835	1.00378	1.0047	1.00644	0.988247		1.00102	0.00120695			1.00025	1.00561	0.998927	1.00057	0.998321	0.99471	0.997715	0.998777	0.988725	0.997201	0.994758	0.998618		0.997849	0.00116557		0.99546	1.00167	1.00098	1.0026	0.997552	1.0007	0.998992	1.00093	1.00418	0.999885	1.0008
0.714967	1.00235	0.995182	1.00666	0.998544	1.01174	1.01082	1.00498	1.00344	1.00093	0.99572	1.01123	1.00199	1.00252	1.00597	1.00687	0.990595		1.0031	0.0015004			1.00002	1.01013	0.999161	0.999904	1.00066	1.00056	1.00515	1.00093	0.988938	0.995667	0.993841	0.998267		0.999435	0.00153183		0.994132	1.00288	1.00283	1.00298	0.999053	0.998745	0.998357	1.0032	1.00341	1.00111	0.998803
0.723	1.00427	0.997776	1.00641	1.00255	1.00885	1.00966	1.00545	1.0045	0.997667	0.995915	1.0034	0.997599	1.00158	1.00115	1.00741	0.995961		1.00251	0.00112963			1.00162	1.00575	1.00104	0.998734	0.997508	0.997716	1.00134	1.00015	0.988957	0.996292	0.994633	0.996445		0.998349	0.00121874		0.995897	1.00601	1.00281	1.00468	1.00017	0.998429	0.999091	1.00174	1.00393	0.999926	1.00187
0.731033	1.00552	0.998716	1.00949	0.995547	1.00765	1.01343	1.00397	1.00304	1.00029	0.997101	1.00868	0.995995	1.00151	1.00279	1.00807	0.997112		1.00306	0.00135388			0.999617	1.00053	1.00195	0.999298	1.00122	1.00071	1.00435	0.999925	0.987622	0.996812	0.996068	0.995525		0.998637	0.00123777		0.991849	1.00151	0.998614	1.00256	1.00049	0.998492	0.998584	1.00352	1.00293	1.00131	1.0022
0.739067	1.00436	1.0008	1.00675	0.996737	1.00643	1.01151	0.998903	1.00328	0.998859	0.996012	1.01538	1.00271	1.00412	1.00381	1.00697	0.990332		1.00293	0.00152545			0.99895	1.00952	1.00182	0.997845	0.99539	0.996601	1.00235	0.997636	0.988302	0.998942	0.995176	1.00178		0.998692	0.00147568		0.990841	1.00474	1.00152	1.00171	0.998249	0.99487	0.999401	1.00037	1.00268	0.999898	1.00127
0.7471	0.998864	0.99742	1.00896	0.996479	1.00409	1.01122	1.0022	1.00354	0.999907	0.99621	1.00599	0.997718	1.00269	1.00184	1.00777	0.986539		1.00134	0.00149923			0.999899	0.999868	1.00089	0.99686	1.00081	0.99533	1.00171	0.996684	0.988389	0.997689	0.995271	0.997202		0.99755	0.0010495		0.993367	1.005	1.00137	1.0023	1.00112	0.996003	1.00151	1.00316	1.00183	1.00265	1.0003
0.755133	1.00179	0.997141	1.00614	0.998556	1.00655	1.0082	1.00434	1.00435	0.999554	0.996997	1.00223	0.998046	1.00228	1.00379	1.00768	0.985963		1.00147	0.00138093			0.999762	1.00149	1.0006	0.996148	0.998905	0.994579	1.00208	0.998706	0.988726	0.995408	0.999217	0.998484		0.997843	0.00106369		0.996803	1.00505	1.00297	1.00266	0.999347	0.99857	0.997776	1.00015	1.00171	1.00006	0.999977
0.763167	1.00166	1.00043	1.00532	1.01449	1.00329	1.00277	0.998379	1.00276	0.999524	0.996212	1.00817	0.995936	1.00435	1.00545	1.00498	0.991353		1.00219	0.00135247			1.0005	1.0011	0.999703	1.00041	0.999894	0.99409	1.00633	0.999585	0.98837	0.997413	0.995284	1.00025		0.998577	0.00128158		0.989915	1.0017	0.999648	1.0014	0.996165	0.999742	1.00083	0.997908	1.00341	0.997457	0.998337
0.7712	1.00217	1.00042	1.00986	1.00293	1.0092	1.00905	1.00498	1.00549	1.001	1.00016	1.00385	0.994206	1.00114	1.00353	1.00869	0.985713		1.00265	0.00153131			1.00091	1.00588	1.00123	0.998331	0.998881	0.995186	1.0026	0.999336	0.989444	0.999676	0.996503	0.997191		0.998764	0.0011826		0.990951	1.00303	1.00309	1.00489	0.998159	0.99824	1.00168	0.999167	1.00495	1.00324	1.00091
0.779233	1.00092	1.00744	1.00926	0.997771	1.00968	1.00812	1.002	1.00451	0.999764	0.999616	1.00619	0.996961	1.0016	1.00756	1.01452	0.991583		1.00359	0.00146289			0.999213	1.00239	1.00273	0.997838	0.996673	0.994888	1.00205	0.993409	0.988818	0.999212	0.993703	1.00185		0.997731	0.00126196		0.996082	1.00452	1.00033	1.00063	0.995493	1.00039	0.999879	0.999021	1.00577	0.999037	1.00088
0.787267	1.00218	0.997605	1.01115	0.994247	1.01253	1.01319	1.00758	1.0057	0.998434	0.998958	1.00384	0.996583	1.00358	1.00447	1.0059	0.985097		1.00256	0.00182906			0.999872	1.00395	0.998655	0.995607	0.992791	0.984836	1.00219	0.998901	0.989799	1.00067	0.997023	1.00144		0.997144	0.00161002		0.994702	1.00157	1.00158	1.00104	0.999367	1.00246	1.00285	1.00034	1.0029	1.00365	0.999355
0.7953	0.99825	0.990841	1.00296	0.984029	1.01082	1.0135	1.00111	1.00519	0.999005	0.997912	1.00699	0.995977	1.00213	1.00465	1.00911	0.993619		1.001	0.00191736			1.00137	1.00141	0.998878	0.999772	0.997671	0.997562	1.00137	0.997763	0.988507	0.996856	0.999103	0.998634		0.998241	0.000995947		0.995049	1.00399	1.00202	0.999779	0.996943	1.00478	1.00179	0.99897	1.0031	1.00377	1.00124
0.803333	1.00247	0.997572	1.00561	0.99631	1.00468	1.00796	0.999409	1.00352	0.999465	0.995915	1.00343	1.0009	1.00207	1.00141	1.01059	0.992884		1.00151	0.00114936			1.00035	1.00129	1.00198	1.00095	0.998523	0.997067	1.00058	1.00002	0.987404	0.996699	0.994739	0.997311		0.998077	0.00116061		0.994027	1.00511	1.00178	1.0038	0.997197	1.00225	1.0002	0.996924	1.00089	0.995687	1.00044
0.811367	1.00217	0.995592	1.00971	0.995375	1.0054	1.0123	0.996193	1.00112	0.998892	0.996728	1.00451	0.996243	1.00429	1.00543	1.00406	0.981247		1.00058	0.00181777			1.00059	0.998425	1.00256	0.998442	1.00208	0.999016	0.998418	0.995446	0.989007	0.998291	0.996309	1.00174		0.99836	0.0010606		0.992257	1.00619	1.00224	1.00352	0.997465	0.997472	0.995443	0.997647	1.0019	0.998795	1.0011
0.8194	1.00244	1.0013	1.00945	0.9963	1.00997	1.0102	1.00383	1.00492	1.00001	0.99678	1.00382	0.996887	1.00246	1.00428	1.00821	0.985526		1.00227	0.0015894			0.998773	1.00491	0.99996	0.99818	0.999457	0.998159	1.00311	0.996791	0.988652	0.998924	0.998095	1.00076		0.998814	0.0011342		0.996464	1.00141	1.00243	1.00424	0.99979	0.997142	0.998777	0.998363	1.00067	0.997881	1.00039
0.827433	1.00109	1.00217	1.00802	0.999125	1.00473	1.00972	0.999217	1.00416	1.00127	0.999248	0.999499	0.999146	1.00067	1.00669	1.01175	0.980561		1.00169	0.00173714			0.998175	1.00036	1.00063	0.998307	0.997655	0.998907	1.00067	0.996119	0.987581	0.996249	0.994822	0.99627		0.997145	0.00103043		0.997305	1.00395	0.99902	1.00182	0.998891	0.99902	0.998653	1.00095	1.00397	1.00233	1.00086
0.835467	1.00132	0.997379	1.01005	0.997356	1.00515	1.0131	1.0047	1.0038	0.999498	0.999298	1.00257	1.00319	1.00665	1.00753	1.01023	0.985225		1.00294	0.00165142			0.997938	0.999419	0.999255	1.00003	0.996935	0.995683	0.995668	1.00138	0.989757	1.00224	0.996	0.999136		0.997788	0.000960601		0.993249	1.00181	1.00093	1.0014	0.996046	0.999013	1.00037	0.996109	1.00171	0.996876	1.00058
0.8435	1.00148	1.00023	1.00671	0.994278	1.01571	1.02279	1.00817	1.00691	1.00009	1.00117	0.99857	1.00003	1.00211	1.00912	1.0111	0.979463		1.00362	0.00240394			0.999137	0.997135	1.00044	1.00092	1.00121	1.00182	0.996494	0.99841	0.988483	0.998051	0.994251	1.0013		0.998138	0.00109807		0.998788	1.00493	1.0034	1.00662	0.998665	0.999175	1.00003	0.999822	1.00415	0.999543	1.00165
0.851533	1.00318	1.00007	1.01071	1.00199	1.0104	1.01756	1.00238	1.00661	1.00196	1.00094	1.00319	1.00178	1.0029	1.00429	1.00653	0.98958		1.00401	0.00149216			1.00179	1.00131	0.999576	0.999241	0.997391	0.996499	0.996412	1.00246	0.988546	1.00038	0.99472	1.00145		0.998315	0.001138		0.990256	1.00242	1.00003	1.00239	0.995655	1.00137	0.999295	1.00078	1.00605	1.00277	1.00082
0.859567	1.00234	0.99999	1.00435	1.00059	1.00876	1.02044	1.00602	1.00553	1.00128	0.999743	1.00315	1.0009	1.00286	1.00535	1.00598	0.981951		1.00308	0.00187674			1.00045	1.00401	0.996843	0.998556	0.995747	1.00401	0.997475	0.994751	0.988499	0.99612	0.996773	1.00244		0.997973	0.00126385		0.993599	1.00389	1.00286	1.00315	0.999985	1.00118	0.99726	0.998806	0.999815	0.99635	0.998255
0.8676	1.00334	0.995642	1.00769	1.0006	1.00473	1.01791	0.99537	1.00358	0.999826	0.999841	1.00369	1.00288	1.00478	1.00646	1.00588	0.988738		1.00256	0.00159467			1.0014	1.00171	0.995927	1.002	0.997914	0.998471	0.99786	0.995426	0.990661	1.00185	0.997476	1.00151		0.998518	0.000994638		0.994141	1.00259	1.00068	1.00102	0.996464	1.00127	1.00011	0.998384	0.999363	1.00016	0.997069
0.875633	1.00067	0.998698	1.00706	1.00045	1.00994	1.02072	1.00539	1.0066	1.00157	1.00085	1.00566	1.00275	1.00495	1.00553	1.00743	0.991081		1.00433	0.00156096			1.0002	0.994857	1.00032	1.00224	0.999233	1.00486	0.998287	0.997542	0.991892	0.999049	0.994786	1.00211		0.998783	0.00104932		0.997116	1.00419	1.00321	1.00257	0.998053	0.998666	1.00038	1.00189	0.999429	0.999074	0.997689
0.883667	1.0047	0.999775	1.00538	0.999634	1.00942	1.0193	1.00638	1.00586	1.00115	1.00043	1.00458	1.00431	1.00149	1.00683	1.01186	0.993913		1.00469	0.00144849			1.00071	0.998448	0.998885	0.996307	0.997068	1.00346	0.994737	0.993109	0.992285	0.999754	0.999975	1.00102		0.99798	0.00097403		0.995461	1.00474	1.00186	1.00284	0.99775	1.00059	0.998646	0.998639	1.00096	1.0007	1.00122
0.8917	1.00161	0.996647	1.00539	0.999907	1.00802	1.01889	1.00544	1.00637	1.00233	1.00106	1.00608	1.00047	1.00183	1.00522	1.00883	0.98326		1.00321	0.00182772			0.998875	0.997768	0.999915	0.998941	0.995403	1.00127	1.00145	0.997093	0.991942	1.00221	1.00114	0.998806		0.998735	0.000843935		0.996061	1.00343	0.99723	1.0007	0.99449	1.00078	1.0033	1.00185	1.00398	1.00127	1.00095
0.899733	1.00066	0.997114	1.0043	0.998974	1.0112	1.01973	1.00712	1.00768	1.00301	1.00344	1.00239	1.00312	1.00255	1.00559	1.00912	0.993457		1.00434	0.00151582			1.0021	1.00268	1.00094	0.999956	0.993721	0.998477	0.995855	0.994228	0.994675	0.99949	0.996953	1.00253		0.998467	0.000956753		0.996886	1.00361	0.998885	1.00594	0.997849	1.00036	0.999177	0.998019	1.00269	1.00049	0.999096
0.907767	0.997467	0.993059	1.00581	0.994914	1.00609	1.01992	1.00317	1.00592	1.00161	1.00052	1.00594	1.00153	1.0019	1.00882	1.01179	0.988989		1.00297	0.00186487			0.999821	0.995988	0.99875	1.00086	0.998377	1.00523	0.997771	0.99956	0.993342	0.999018	0.999799	1.00005		0.999047	0.000816266		0.998117	1.00209	1.00198	1.00293	0.999572	1.00114	0.999294	0.99723	1.00105	0.999412	1.00001
0.9158	1.00061	0.997477	0.999171	0.997912	1.00778	1.01846	1.00177	1.00745	1.00033	0.9988	0.998692	1.00117	1.00164	1.00839	1.01163	0.991448		1.00267	0.00163775			1.00067	0.999857	1.00136	1.00297	0.999808	1.00523	0.996275	0.997915	0.992172	1.00082	1.00033	0.998697		0.999676	0.000950399		0.995812	1.00334	1.00028	1.00207	0.997572	1.00086	0.99768	0.999792	1.00259	1.00001	0.999724
0.923833	1.00045	0.998049	1.00562	1.00033	1.00544	1.02106	1.00052	1.00576	1.0007	1.00334	1.00297	0.99896	1.00426	1.00556	1.00774	0.986526		1.00295	0.00172522			1.00317	1.00421	0.998995	1.00023	0.99429	0.999973	0.997889	0.998837	0.990916	0.997645	0.9995	0.998996		0.998721	0.00101858		0.993837	1.00038	1.00087	1.00133	0.996427	0.99964	0.999486	0.99742	1.00271	0.998248	0.999261
0.931867	0.998341	0.998765	1.00505	0.998046	1.00318	1.01498	1.00001	1.0044	1.00065	0.998004	1.00417	1.00425	1.00103	1.00982	1.00772	0.991194		1.00248	0.00139029			0.999875	1.00273	0.999201	1.00001	0.999484	1.00515	0.997407	0.998793	0.994007	1.00079	0.999515	1.00057		0.999795	0.000777036		0.996001	1.00284	0.99896	1.00032	0.998761	0.997045	0.994986	0.996298	0.998978	1.00248	0.99777
0.9399	0.999014	0.99917	1.01093	1.00251	1.00568	1.01685	0.997076	1.00387	0.996336	1.00233	1.00024	1.00128	1.00189	1.00562	1.00913	0.995208		1.00295	0.00142931			1.00047	1.0018	1.00041	1.00136	0.996872	1.00311	0.993354	0.993185	0.99313	0.998224	1.00276	1.00072		0.998784	0.0010883		0.997006	1.00311	1.00253	1.00423	1.0005	0.998696	0.995511	1.0018	1.0007	1.0032	1.00006
0.947933	1.00279	0.994113	1.00149	0.998833	1.00495	1.02156	0.999146	1.00544	1.00044	1.003	0.999572	1.0014	1.00169	1.00562	1.00759	0.987826		1.00222	0.00175459			1.00205	0.996924	0.999791	1.00045	0.999223	0.999737	1.00169	0.994543	0.98947	0.99522	0.999135	0.99862		0.998071	0.00102599		0.994593	0.999596	0.998541	1.0014	0.996285	0.99859	0.997687	0.998469	0.999039	0.998458	0.996685
0.955967	0.997841	0.99539	1.00209	0.999882	1.00605	1.01611	1.00095	1.0041	1.00171	0.99864	1.00573	1.00396	1.00254	1.00466	1.01052	0.998511		1.00304	0.00127527			1.00089	1.0019	0.99924	1.00216	1.00147	1.00208	0.998267	0.999488	0.990503	0.998094	0.997721	0.999481		0.999275	0.000922787		0.994761	1.00089	0.999914	1.00314	1.00008	1.00029	0.998671	0.994814	0.999841	1.00081	0.999562
0.964	1.00106	0.996889	1.00189	1.00235	1.01199	1.0192	1.00151	1.00523	1.00152	0.99795	1.00141	1.00548	1.00384	1.00387	1.00444	0.991028		1.0031	0.00154978			0.998262	1.00017	1.00232	0.999942	1.0005	1.0004	0.997218	0.997795	0.991291	0.995363	0.995133	0.999743		0.998178	0.000882222		0.998768	1.00147	1.00231	1.00322	1.00176	1.00021	0.995533	1.00276	1.00317	1.00059	0.999095
0.972033	1.00185	0.99688	1.00194	1.00123	1.00478	1.01574	1.00234	1.00566	0.998766	0.996979	1.00381	1.00515	1.00451	1.01036	1.00921	0.993283		1.00328	0.00138995			0.998994	0.999661	0.999764	1.00116	1.00269	1.0021	0.997184	0.997888	0.992461	0.998545	0.998602	0.999831		0.999073	0.000764701		0.996982	1.00089	1.00173	1.00324	0.998808	1.00122	0.998996	0.99967	1.00019	0.997766	0.999148
0.980067	1.00191	0.997913	1.0025	0.999904	1.00893	1.02303	1.00787	1.00691	0.999754	0.997861	0.996905	1.00117	0.998334	1.00502	1.01113	1.00007		1.0037	0.00168599			0.997004	0.995996	0.999172	1.0022	1.0015	0.999133	0.998736	0.996104	0.993789	0.998622	1	1.00397		0.998853	0.000829247		0.998143	1.00062	1.00392	1.00452	1.00022	1.00279	0.997654	0.999008	0.999382	0.99986	0.995725
0.9881	1.00046	0.9962	0.999554	0.999587	1.01132	1.02334	1.00691	1.00568	1.00156	0.996621	1.00295	1.00439	1.00373	1.00413	1.00858	0.99752		1.00391	0.00167859			1.00054	0.998301	0.998446	0.99808	1.00092	1.0075	1.00019	0.999667	0.99628	1	1.00139	1.00515		1.00054	0.000893355		0.993221	0.994771	0.996629	1.00242	0.995361	0.996809	0.996724	0.999668	1.00142	1.00019	1.00278
0.996133	1.0033	0.995602	0.998895	1.00008	1.00369	1.02194	1.003	1.00612	1.00199	1.00054	0.99695	1.00278	0.999714	1.00878	1.01091	0.99807		1.00327	0.00161073			1.0036	0.997695	0.99823	0.998915	1.00136	1.00256	1.00254	0.993633	0.992291	0.9975	1.00102	0.999498		0.99907	0.00100954		0.99615	1.00039	0.999431	0.999519	0.999927	0.996693	0.997245	1.00032	1.00028	0.99769	0.998065
1.00417	1.00169	0.998005	1.00062	1.00259	1.00758	1.02332	1.00312	1.00544	1.00313	0.999264	1.00164	1.00586	1.00678	1.00819	1.00512	0.992789		1.00407	0.00161756			1.00167	0.995847	1.00112	1.00149	0.998787	0.997772	0.998541	0.993824	0.994478	1.00049	0.998479	1.00334		0.998819	0.000860089		0.994256	0.996582	0.997371	1.00008	1.00014	0.999456	0.999862	0.999632	1.00081	1.0018	0.998417
1.0122	1.0018	0.99514	0.999891	0.998249	1.0107	1.02431	1.01042	1.00562	0.999715	0.997613	0.998954	1.00156	1.00302	1.00582	1.01274	0.995817		1.00384	0.00190658			0.999909	0.998829	0.999595	1.00385	0.999049	1.00237	0.991227	0.993921	0.994512	1.00081	0.998117	1.00153		0.998643	0.00107084		1.00164	0.998107	1.00167	1.00201	1.00172	1.00032	0.998799	0.99592	1.00034	1.00001	1.00098
1.02023	1.00055	0.993998	0.995379	0.999224	1.00968	1.02343	1.00552	1.00639	0.99773	0.99828	0.997026	0.999718	1.00036	1.00909	1.01164	1.0042		1.00326	0.00188719			0.997697	0.996928	1.00046	1.00441	1.00214	1.00042	1.00197	0.99455	0.996236	0.998948	0.997195	1.00073		0.999306	0.000828428		0.997394	0.995673	1.00042	1.00254	1.00102	0.998573	0.997853	0.994929	1.00145	0.998394	0.997111
1.02827	1.00117	0.997093	0.997459	1.00571	1.00615	1.02365	1.00562	1.00394	0.999593	0.995969	1.00041	1.00108	0.998278	1.00621	1.00623	0.987485		1.00225	0.00190039			1.00262	0.996131	1.00095	1.00163	0.997532	0.999979	1.00064	0.996815	0.994686	0.999774	0.999068	1.00301		0.999403	0.000758798		0.998123	0.992465	0.998673	1.00114	1.00032	0.999957	0.996442	0.996722	1.0006	1.00449	1.00177
1.0363	0.999166	0.996406	0.993296	0.998605	1.00408	1.02616	1.01046	1.00662	1.0001	1.00102	0.997356	1.00087	1.00134	1.0056	1.01413	1.00072		1.0035	0.00200142			1.0008	0.998319	0.998376	0.998757	1.00045	1.00474	0.998814	0.995205	0.995351	0.998447	0.996798	1.00294		0.999083	0.000814155		0.995557	0.994633	0.99952	1.00205	0.999034	1.00639	0.999636	0.996075	0.999128	1.00097	0.996895
1.04433	1.00036	0.997516	0.999329	1.00226	1.00816	1.02518	1.01191	1.00624	1.004	0.996955	0.995763	1.00042	1.00125	1.00499	1.0061	0.996153		1.00354	0.00184267			1.00174	0.994169	0.997914	1.00035	0.99764	0.99974	0.996768	1.00112	0.993899	0.999321	1.00001	1.00376		0.998869	0.000849659		0.995735	0.997732	1.00041	1.00038	0.999808	1.00303	1.00023	1.00463	1.00382	0.999882	1.0009
1.05237	0.998088	0.999131	0.995052	0.998694	1.00364	1.02047	1.0005	1.00457	1.00175	0.998061	1.00177	1.005	1.00371	1.00413	1.00828	0.996493		1.00246	0.00149147			1.00032	0.997914	0.998982	1.00066	0.998478	1.00283	0.997015	0.996922	0.992652	0.999453	0.994734	1.00425		0.998685	0.00092941		0.99525	0.995238	1.00319	1.00128	1.00166	1.00184	0.999366	0.992167	1.00153	0.996025	0.997362
1.0604	1.00057	0.997861	0.998108	0.999967	1.01143	1.02658	1.01443	1.00816	1.00184	0.99605	1.0026	1.00291	0.999753	1.00273	1.00806	0.989195		1.00376	0.00215748			1.00209	1.00112	1.00165	0.999686	1.00152	1.00471	0.996436	1.00001	0.995165	0.999643	0.99845	1.00515		1.00047	0.000850319		1.00066	0.99605	1.00143	1.00319	0.999969	1.00203	0.995921	0.997434	0.997774	1.00005	0.996933
1.06843	1.0015	0.998682	0.99772	1.0009	1.00872	1.02754	1.01021	1.00749	1.00326	0.999146	0.996904	1.00452	1.00019	1.00462	1.00705	0.993307		1.00386	0.00196188			0.998995	1.00133	1.00222	1.00442	1.003	1.0006	1.00143	0.997864	0.995057	0.997764	0.999	1.00122		1.00024	0.000751209		0.997789	0.992188	1.00011	1.00141	1.00053	1.00515	1.00112	0.998413	0.999385	0.999966	0.999603
1.07647	0.998473	0.996968	0.996313	1.00071	1.00867	1.0218	1.00493	1.00531	1.00116	0.999411	1.00274	1.00607	1.00084	1.00285	1.00568	0.990915		1.00268	0.00168736			0.999952	0.996959	0.998756	1.00061	0.995456	0.996814	0.997191	0.999241	0.990879	0.996848	0.996908	1.00088		0.997541	0.000785067		0.997329	0.991596	0.997424	0.997281	0.999511	1.00332	0.998209	1.00088	1.00378	1.00061	0.997216
1.0845	0.997605	0.997775	0.992255	1.00021	1.00801	1.02124	1.00868	1.00613	1.00059	0.997168	1.00207	1.00527	0.999978	1.00208	1.01047	0.997662		1.00295	0.00173162			0.999371	0.998868	0.999041	0.999518	0.998589	0.998096	0.999077	0.994009	0.997187	0.999041	0.999161	1.00386		0.998818	0.000632713		0.997149	0.994387	0.999333	1.00235	0.999008	1.00183	0.997094	0.996337	1.00172	0.997862	0.997913
1.09253	1.00094	0.996484	0.994359	1.00136	1.0064	1.02292	1.0095	1.00776	1.00104	0.999173	1.00085	1.00642	1.00388	1.00493	1.00427	0.995244		1.00347	0.00170138			1.00049	0.999244	0.998023	0.996747	0.998796	1.00241	0.992721	0.997962	0.995668	0.998284	1.00197	1.00691		0.999102	0.00104197		0.996357	0.993671	0.998903	1.00216	0.999656	1.00096	0.995713	0.996655	1.00196	1.00149	1.00089
1.10057	1.0015	0.998177	1.00039	1.00041	1.00782	1.02784	1.01123	1.00699	1.00274	0.997454	1.00066	1.00462	1.00079	1.00835	1.00551	0.994255		1.0043	0.00192685			0.997708	0.997778	1.0018	0.999186	1.00151	1.0061	0.997751	0.998498	0.995617	0.999406	0.999337	1.00594		1.00005	0.000937688		0.998137	0.996357	1.00103	1.00308	1.00174	1.00618	1.0012	0.996858	1.00283	1.00094	0.998039
1.1086	1.00299	1.00019	0.997473	1.00249	1.01408	1.02604	1.01126	1.00673	1.00284	0.997165	0.997387	1.00334	0.999717	1.01009	1.00721	0.988579		1.00422	0.00214351			1.00077	0.99855	0.999655	1.00126	0.998262	0.997376	0.998839	0.994697	0.995062	1.00031	0.999995	1.00729		0.999338	0.000937949		0.999373	0.994028	1.002	1.00329	0.99863	1.00751	1.00248	0.999641	1.003	1.00358	1.00077
1.11663	1.00049	0.997747	0.996851	1.00097	1.01136	1.02573	1.01015	1.00743	1.00123	0.995961	1.00097	1.00665	1.0016	1.00427	1.00628	0.989946		1.0036	0.00202279			1.00014	1.00154	1.00084	0.999974	0.998061	0.997946	0.997169	0.998452	0.997726	0.998008	1.00023	1.00652		0.999717	0.000739892		0.9994	0.995831	1.0008	1.00198	1.00121	1.00831	0.999406	0.996798	0.998455	0.999354	0.997555
1.12467	0.996558	0.994094	0.993242	0.997088	1.00959	1.02102	1.00987	1.00761	1.00036	0.998534	0.997535	1.00194	0.996435	1.01025	1.00065	0.982523		1.00108	0.00224252			1.00153	0.999368	1.00022	0.997908	1.00075	1.00406	0.995747	0.994526	0.996523	1.00233	1.00152	1.00996		1.00037	0.00119887		0.997459	0.994691	1.00306	1.00194	1.00008	0.998749	1.00024	0.996322	0.999025	1.00202	0.999672
1.1327	1.00097	0.998552	0.995958	1.00079	1.00482	1.02661	1.00595	1.0034	1.0057	0.997588	0.99732	1.00323	1.0008	1.00336	1.00782	0.990336		1.0027	0.00194093			1.00565	0.996407	0.998623	0.999904	0.996544	1.00329	0.998937	0.996078	0.995669	0.996525	1.00067	1.00829		0.999715	0.00118407		0.996121	0.992748	1.0024	1.00109	0.999148	1.00332	0.999723	0.996587	0.99956	0.999586	0.997317
1.14073	1.00129	0.998325	0.995358	1.00082	1.01105	1.02422	1.01151	1.00625	1.00231	0.996813	0.996262	1.00622	0.99878	1.00283	1.00697	0.995826		1.00343	0.00189592			1.00204	0.998055	0.999987	0.998491	1.00002	1.00312	0.996155	0.997864	0.994331	0.997835	0.997092	1.00776		0.999396	0.00103155		0.994753	0.995938	0.998413	1.00257	1.00014	0.998931	0.997287	0.999812	0.998503	1.00239	0.994546
1.14877	0.999355	0.997054	0.998961	1.00209	1.00537	1.02275	1.00917	1.00743	1.00151	0.997534	0.992796	1.0014	0.998181	1.00479	1.00438	0.99472		1.00234	0.00176528			1.00021	0.997228	1.00005	1.00319	1.00249	1.00231	0.998569	0.996489	0.998843	0.999344	1.00114	1.00971		1.0008	0.00100578		0.997039	0.995038	0.999331	0.998931	0.998564	1.00092	1.00046	0.998612	1.00036	0.999184	1.00053
1.1568	0.997326	0.997126	0.994179	1.00295	1.0026	1.02237	1.00457	1.00621	1.00256	0.999222	0.99635	1.00276	0.999375	1.01487	1.00888	0.995468		1.00293	0.00186725			0.998375	1.00186	1.00208	1.0013	0.998243	1.00224	0.996672	0.996001	0.995058	0.997038	0.999322	1.00914		0.999778	0.0011145		0.995086	0.990831	1.00161	0.999549	0.997251	1.00194	1.00016	0.994986	1.00176	0.999775	0.996884
1.16483	0.998029	0.998242	0.995004	1.00284	1.00675	1.02195	1.00746	1.00522	0.999861	0.997713	0.991788	1.00405	0.996901	1.01665	1.01208	0.999471		1.00337	0.00203096			0.999887	1.00229	1.00091	0.998694	0.998779	0.999962	0.995198	0.996258	0.996367	1.00034	0.999172	1.00769		0.999629	0.000945006		0.998037	0.991955	1.00479	1.00147	1.0003	1.00352	1.00195	0.997154	1.00297	0.999648	0.996959
1.17287	1.00002	1.00101	0.991925	1.0019	1.00782	1.01828	1.01125	1.00724	1.00084	1.00016	0.99398	1.00985	0.99846	1.00601	1.00321	0.992269		1.00276	0.0017846			1.00304	1.00621	1.00108	1.0014	1.00342	1.00473	0.994743	0.996016	0.996346	0.99524	0.997552	1.00663		1.00053	0.00126455		0.995605	0.991908	0.999628	0.997749	0.99634	1.00419	1.00479	1.00073	1.00375	1.00464	0.99801
1.1809	0.999794	0.999241	0.995587	1.00555	1.00807	1.01945	1.01003	1.0062	0.999797	0.996124	0.994898	1.00594	0.998308	1.00497	1.01419	0.998637		1.00355	0.00175481			1.00242	1.0029	0.999781	0.996438	0.997877	1.00161	0.996517	0.996486	0.996541	0.999524	0.99925	1.00528		0.999553	0.000856603		0.996035	0.991297	1.00071	1.00508	0.999427	1.00235	1.00039	0.998761	1.00124	1.00082	0.996078
1.18893	0.998652	0.998398	0.994769	0.998719	1.00739	1.01898	1.01132	1.00737	1.00351	0.998986	0.990278	1.00769	0.999434	1.00353	1.00862	0.993153		1.00255	0.00185696			1.00269	1.00243	0.999312	1.00095	0.996035	1.00506	0.997852	0.997865	0.997134	0.997196	0.994111	1.00384		0.99954	0.000984665		0.997224	0.992428	0.998	1.00165	0.997831	1.00322	1.0024	1.00076	1.0015	1.00309	1.00006
1.19697	1.00048	0.999082	0.994649	1.00473	1.00632	1.01801	1.00899	1.00394	0.998477	0.998168	0.996509	1.00582	0.994755	1.00178	1.00668	0.989297		1.00173	0.00171575			0.997725	0.995421	0.996394	1.00277	0.997086	0.997542	0.997229	0.995971	0.996202	0.996824	0.997998	1.00284		0.997834	0.000704624		0.995633	0.990387	0.995989	1.00039	0.995871	1.0051	0.999086	0.996492	0.998764	0.998612	0.998199
1.205	0.994713	0.995337	0.99475	0.999812	1.00299	1.01897	1.01157	1.00517	0.999875	0.99917	0.994511	1.00495	0.996466	1.00344	1.00734	0.992191		1.00133	0.00179462			0.99811	1.00206	1.00082	1.0015	0.997453	0.996643	0.990689	0.988912	0.994274	0.995983	0.995791	1.00448		0.997225	0.00132702		0.992972	0.990214	1.00151	0.99747	0.997692	1.00142	0.999619	0.996737	0.999164	1.00424	0.999472
1.21303	0.996607	0.995397	0.992875	1.00024	1.00252	1.02191	1.01052	1.00559	1.00086	0.998986	0.995484	1.00837	0.99781	1.00055	1.00591	0.990144		1.00149	0.00194296			0.997353	0.997662	1.00063	0.999447	0.996531	0.998	0.996315	0.997993	0.995245	0.999782	0.995701	1.00599		0.998387	0.000837466		0.99467	0.994639	0.998825	0.998201	0.994927	1.0041	1.00039	0.997927	1.00322	0.999551	0.997624
1.22107	0.997923	0.998729	0.993636	0.998284	1.00284	1.0143	1.0099	1.0041	1.00124	0.999709	0.99761	1.0088	0.999432	1.00098	1.00476	0.989987		1.00139	0.00152062			1.00035	0.999067	0.998393	0.999964	0.997467	0.996811	0.991981	0.992909	0.997538	0.99846	0.998657	1.00631		0.998159	0.00104507		0.995448	0.993491	1.00202	1.00089	0.998716	1.00367	1.00035	1.00009	0.999618	0.997425	0.996536
1.2291	0.995587	0.996065	0.993878	0.997748	1.0043	1.0234	1.00657	1.00378	1.0019	1.00001	0.995517	1.00612	0.999489	1.0015	1.00803	0.993281		1.0017	0.00185749			1.00017	1.00282	0.999918	1.00128	0.995897	0.999661	0.99485	0.999582	0.993841	0.996927	0.995604	1.00518		0.998811	0.000991857		1.0001	0.995023	1.00175	1.00212	0.9995	1.00188	0.998965	1.00084	1.00256	1.00342	0.998429
1.23713	0.99815	0.99614	0.994154	1.00513	1.00267	1.01748	1.00991	1.00622	1.00332	0.997196	0.994553	1.00493	0.995544	1.00055	1.00513	0.994318		1.00159	0.00163256			1.00191	0.996283	1.0011	1.00115	1.00012	0.996856	0.995359	0.998138	0.998345	0.997504	1.00241	1.00129		0.999205	0.000694897		0.994812	0.990494	0.999556	1.00197	0.996455	1.00315	1.00005	0.997807	1.00105	1.0006	0.998606
1.24517	0.995023	0.999254	0.995263	1.00213	1.00753	1.02298	1.01432	1.00731	1.00185	0.99929	0.990945	1.00669	0.997225	1.00347	1.00312	0.993559		1.0025	0.00203866			1.00031	0.997842	0.999096	1.00118	1.00012	1.00583	0.995545	0.994309	0.998762	1.00009	1.00006	1.00693		1.00001	0.00103996		0.99572	0.995297	1.00083	0.998076	0.995274	1.00259	0.999137	0.997088	1.00147	0.998565	0.998898
1.2532	0.996106	0.997338	0.994948	1.00275	1.00221	1.01736	1.01085	1.00637	1.00064	1.00118	0.993109	1.00485	0.995243	1.00448	1.0083	0.990078		1.00161	0.00178095			0.99859	1.00575	1.00036	1.00186	0.999279	1.00419	0.996603	0.993037	0.999094	0.997827	0.998344	1.00359		0.999877	0.00102118		0.99741	0.994962	0.998248	0.997208	0.997801	1.0036	1.00122	0.997229	1.00259	1.00173	0.998577
1.26123	0.997961	0.999167	0.993963	1.00454	1.00239	1.0173	1.01358	1.00465	1.00175	1.00098	0.989526	1.00523	0.994675	1.00234	1.00277	0.98762		1.00115	0.00192338			0.997923	0.998009	0.998767	1.00149	1.00449	0.999981	0.993099	0.992921	0.995655	0.996708	0.994574	1.00727		0.998407	0.00126561		0.993104	0.993872	1.00168	0.998047	0.998042	1.00583	1.00137	0.997433	1.00076	1.00062	0.997664
1.26927	0.998992	1.00175	0.9969	1.00249	1.00314	1.01791	1.01112	1.00538	1.00501	0.998246	0.996281	1.00668	0.996807	1.00505	1.00711	0.995944		1.00305	0.00150477			1.00091	1.00091	0.998948	1.00005	0.998905	1.00231	0.994688	0.990493	0.997699	0.997611	0.998186	1.0027		0.998619	0.000979323		0.993379	0.990686	0.995404	0.995879	0.995221	1.0029	1.00059	0.999	1.00194	0.999698	0.99845
1.2773	0.998545	1.00154	0.997227	1.0048	1.00349	1.01528	1.0109	1.00485	1.0029	0.99945	0.997355	1.00864	1.00273	1.00217	1.0031	0.987912		1.00256	0.00155039			0.999698	1.00305	0.999049	0.998036	1.00029	1.00113	0.991833	0.994402	0.997764	0.997279	0.998391	1.00387		0.998732	0.000970227		0.994732	0.99643	0.999372	0.995545	0.997618	1.00232	1.00084	1.00179	1.00434	1.001	1.00281
1.28533	0.996043	0.999422	0.995521	1.00243	1.00231	1.01214	1.01308	1.00502	1.00035	0.999022	0.996813	1.00986	0.999106	1.0041	1.00709	0.988175		1.00191	0.00164449			1.00441	1.00139	1.00063	0.999139	0.999347	0.995932	0.994989	0.988562	0.996961	1.00182	1.00317	1.0064		0.999395	0.00138864		0.998359	0.997017	1.00117	0.998662	0.999325	1.00643	0.99865	0.995089	0.999745	0.998734	0.998333
1.29337	0.998205	0.995828	0.998293	1.00263	1.00244	1.01048	1.00982	1.00564	1.00283	1.00155	0.992603	1.00652	0.998635	1.0028	1.00844	0.992931		1.00185	0.00138173			1.00263	1.00571	0.996207	0.998262	0.999465	0.999131	0.993441	0.993782	1.00059	1.00024	1.00043	1.01065		1.00004	0.00138588		1.00053	0.997657	1.00105	0.997677	1.00119	1.00336	1.00073	1.00203	1.00066	1.00276	1.00121
1.3014	1.00213	0.997782	0.994317	1.00428	1.00822	1.01073	1.01087	1.00527	1.00351	1.00039	0.99525	1.01045	0.998196	1.00531	1.00227	0.985216		1.00214	0.00172597			0.999078	1.0005	0.999196	0.998687	0.999042	0.99447	0.996181	0.994536	0.998585	0.998322	1.00073	1.00396		0.998608	0.000764605		0.995891	0.996001	0.998029	0.997346	1.00068	1.0016	1.00208	1.00011	1.00209	1.00447	0.999879
1.30943	1.00049	0.997657	0.99195	1.00687	1.00013	1.01297	1.00547	1.00292	1.00055	0.997541	0.994535	1.00915	0.997692	1.00345	1.00337	0.990192		1.00093	0.00152118			1.00087	0.998186	0.998676	0.998735	0.997729	0.995003	0.997314	0.991924	0.999397	0.999482	1.00021	1.00261		0.998345	0.000800367		1.00098	0.997918	1.00001	0.999921	1.00112	1.00445	1.0011	0.995843	1.00333	0.998738	0.995916
1.31747	0.998855	0.993883	0.994061	1.00216	1.00327	1.01273	1.01041	1.00606	0.998749	0.998606	0.999512	1.00915	0.99846	1.00013	1.00528	0.990767		1.00138	0.00153967			0.99981	0.993788	1.00047	0.999144	0.995399	0.994444	0.9912	0.992544	0.99824	0.999607	0.998354	1.00342		0.997202	0.00106014		0.999797	0.993553	0.998686	0.995224	0.999146	1.00273	1.0008	0.998641	0.998118	0.99861	1.00034
1.3255	0.993657	0.993165	0.994029	1.00112	0.994157	1.00882	1.00561	1.0036	1.00127	0.998074	1.0007	1.01029	0.996654	1.00187	1.00668	0.981777		0.999466	0.00180118			0.999598	0.99792	0.999479	1.00113	0.99616	0.996085	0.995947	0.994652	0.999471	0.999749	1.00082	1.00324		0.998688	0.00073845		0.997765	0.998019	0.999112	0.996461	0.998451	1.00049	1.00189	0.996436	1.00123	1.00328	1.00067
1.33353	0.995384	0.994855	0.99219	1.00514	1.00201	1.0137	1.01168	1.00642	1.00113	0.997813	0.994621	1.00881	0.998232	1.00206	1.00171	0.985866		1.00073	0.00184687			1.00123	0.994705	1.00044	0.999625	0.997645	0.991789	0.997513	0.990236	1.00223	1.00353	0.999361	1.01007		0.999031	0.00153809		1.00025	0.996338	1.00001	0.99564	1.00043	1.00086	1.00047	0.999874	1.00285	1.00294	1.00103
1.34157	0.99739	0.997279	0.991435	1.00388	0.997667	1.01172	1.00665	1.00348	1.00847	1.00217	0.994279	1.00867	0.993223	1.00015	1.00728	0.990777		1.00091	0.00165459			1.00038	0.997262	0.998798	1.00213	0.993389	0.99141	0.995853	0.996143	0.996836	1.00012	1.00117	1.00572		0.998269	0.0011395		0.998136	0.996092	1.00282	0.997197	1.00131	1.00103	1.00037	0.995281	1.0027	1.00179	0.997455
1.3496	0.99566	0.993571	0.993163	1.00224	1.00883	1.01625	1.01546	1.00868	1.0013	1.00052	0.995117	1.00719	0.996312	1.00331	1.00367	0.985471		1.00167	0.002092			1.00183	0.992988	0.998712	1.00221	1.0007	1.00113	0.993852	0.991087	0.999189	0.998624	0.998737	1.00328		0.998527	0.00112424		0.996112	0.995776	1.00134	0.996097	0.997695	1.00101	0.999041	0.997853	1.00274	1.00507	1.00049
1.35763	0.99726	0.998408	0.995943	1.0032	1.00484	1.01455	1.01168	1.00663	1.0007	0.998621	0.993039	1.00953	0.998388	1.00098	1.00178	0.984721		1.00127	0.00183531			1.00059	1.0011	1.00023	1.00242	1.00249	1.00092	0.992707	0.991916	0.998064	1.00054	1.00128	1.00459		0.999738	0.00109766		0.999318	0.997902	0.999946	0.999768	0.999794	1.00328	1.00039	0.999364	1.00351	0.999809	1.00233
1.36567	0.998578	0.999108	0.991842	1.00186	1.00025	1.0121	1.00728	1.00619	1.00109	1.00013	0.994418	1.00691	1.00186	0.997094	1.00242	0.989941		1.00069	0.00144637			1.00056	0.99759	1.00017	0.998651	0.997819	1.00051	0.995179	0.991568	1.00016	0.999571	0.997418	1.00411		0.99861	0.000904308		0.998496	0.996652	0.998914	0.9934	0.999291	1.00176	1.00172	0.998912	0.998451	0.999527	1.00042
1.3737	0.999389	1.00033	0.991109	1.00185	1.00651	1.02055	1.01833	1.00837	1.00198	0.998144	1.00052	1.01039	0.998256	0.999954	1.00531	0.989225		1.00314	0.00210066			1.00066	0.99927	1.00079	1.00096	0.996154	0.997775	0.997984	0.993027	1.00279	0.999472	1.00151	1.00869		0.999923	0.00110339		0.998967	0.998237	1.00215	0.996318	0.998023	0.999532	1.00368	1.00254	0.999435	1.00149	1.00105
1.38173	0.997277	0.997537	0.994501	0.998915	1.00563	1.0156	1.01221	1.00623	1.00391	1.00141	0.994325	1.00703	0.995249	0.997586	1.0069	0.992984		1.00171	0.00168998			1.00009	0.996208	1.00015	1.00268	0.99885	0.996152	0.997781	0.991701	1.00135	0.998518	0.998072	1.00193		0.998623	0.000871342		1.00204	0.999147	1.00312	0.997069	1.00047	1.00206	1.00291	1.00184	1.00301	1.00205	1.00077
1.38977	0.997388	0.998955	0.992718	1.00506	0.996197	1.00757	1.00225	1.00609	1.00245	1.00037	0.999345	1.00704	0.999336	1.00295	1.00366	0.995893		1.00108	0.00107506			0.995462	0.998601	1.00082	1.00387	1.00142	0.995342	0.993847	0.993102	0.999089	0.99974	0.994422	1.00248		0.998184	0.00105158		0.996493	0.997715	0.998553	0.992803	0.996853	1.00218	1.00055	0.999159	1.00404	0.999822	1.0006
1.3978	0.998218	0.997654	0.987775	1.00234	0.999884	1.01018	1.00574	1.00461	0.998562	1.0009	1.00212	1.0121	1.00185	0.998603	1.00101	0.992218		1.00086	0.0014864			0.998592	0.992334	1.00205	1.00315	0.998686	0.99697	0.998302	0.994873	0.998957	0.999053	1.00005	1.00563		0.999054	0.00102222		0.996534	1.00177	1.00227	0.993912	1.00102	1.00259	1.00615	0.99793	0.999964	1.00174	0.999909
1.40583	0.995422	0.994567	0.990948	1.0047	0.997293	1.01381	1.00483	1.00485	1.00087	0.996034	0.993129	1.00871	0.998039	1.00116	1.00692	0.996038		1.00046	0.00158694			0.999106	1.0007	1.00125	1.00134	1.00071	0.997641	0.999611	0.992396	1.00065	1.00118	1.0032	1.00455		1.00019	0.000874747		1.00062	1.00118	1.00185	0.996644	1.00072	1.0059	1.00409	1.00274	1.00162	0.99925	1.00298
1.41387	0.999169	1.00076	0.988974	1.00368	1.00216	1.01976	1.00743	1.00701	1.00155	1.00196	0.998984	1.00773	1.00031	1.00085	1.00134	0.992871		1.00216	0.0016853			0.997716	0.996235	1.00311	1.00036	1.0016	1.0028	0.996987	0.990898	1.00141	1.00012	0.999258	1.00307		0.999464	0.00103012		0.998095	0.999043	1.00266	0.99583	0.9996	1.00438	0.999817	0.99883	0.997203	1.00073	0.999558
1.4219	0.998828	0.99927	0.990711	1.00608	1.00156	1.01484	1.00751	1.00743	1.0008	0.99939	0.998454	1.00345	0.997116	0.998666	1.0009	0.994489		1.00122	0.00143211			0.998213	0.998001	1.00184	0.998694	0.999398	0.993641	0.999319	0.994551	1.00131	1.0018	1.00377	1.00289		0.999452	0.000900764		1.00003	1.00072	1.00159	0.996932	0.999564	1.00318	1.00389	0.99676	0.997725	1.00133	0.999119
1.42993	0.99779	0.995639	0.988867	0.998959	0.999528	1.01211	1.00896	1.00729	1.0017	0.99828	0.998484	1.00442	0.993576	0.997372	1.00254	0.99304		0.999909	0.001527			0.999964	0.995555	1.00057	0.999459	1.0004	0.998333	1.00135	0.998025	1.00328	1.00022	1.0022	1.00641		1.00048	0.000792945		0.99524	0.998969	1.00173	0.996416	0.997813	1.0045	1.00206	0.998214	0.999714	1.00276	1.00041
1.43797	0.994648	0.997851	0.990721	0.999979	0.999832	1.01541	1.00602	1.00616	1.00137	1.00114	0.99659	1.00771	0.998223	0.996189	1.00303	1.00114		1.001	0.00146823			0.999685	0.99688	1.00138	1.00231	0.998018	1.00026	0.99965	0.991685	0.999787	0.997845	0.998053	1.00169		0.998937	0.000817051		0.991054	0.997399	0.996062	0.998163	0.997308	1.00082	0.999268	0.999011	0.999179	0.997742	1.00134
1.446	0.995205	0.993235	0.989529	1.00062	0.999726	1.01456	1.00251	1.00598	1.00008	0.99855	1.00273	1.00396	1.00186	1.00322	1.00028	0.999325		1.00071	0.00139102			0.995298	0.996813	0.999125	0.997715	1.00016	0.998737	0.99863	0.99273	1.00362	1.00076	1.00402	1.00624		0.999487	0.00110174		0.998249	1.00171	1.0003	0.996536	1.00021	1.0017	0.998043	1.00141	1.00078	1.00378	1.00228
1.45403	0.994553	0.996283	0.991188	1.00047	1.001	1.01753	1.00708	1.00613	1.00304	1.00232	0.995664	1.00535	0.994608	1.00041	0.997172	0.992069		1.0003	0.00168079			0.998507	0.996795	0.999785	0.996877	0.997185	0.998648	0.99768	0.990217	1.00122	1.00009	0.997994	1.00679		0.998483	0.00109108		0.999143	1.00113	1.00101	0.998929	1.00206	1.00583	1.00362	1.00255	0.999652	1.0012	1.00136
1.46207	0.996687	0.997583	0.992741	0.999587	0.999345	1.01435	1.0065	1.00532	1.00383	1.00108	0.998856	1.00652	0.99857	0.999939	1.00209	0.997968		1.00131	0.00127365			0.997566	0.994121	1.00027	0.993662	0.999048	1.0003	0.996441	0.99276	0.999272	0.998917	0.998569	0.999946		0.997572	0.000777647		0.993002	1.00026	0.997336	0.997603	0.998537	1.00034	1.00267	1.00152	0.999659	0.99949	1.00221
1.4701	0.997353	0.996654	0.993104	1.0015	1.00289	1.01938	1.00593	1.00576	0.999458	0.996874	0.996258	1.0035	0.996876	0.999325	0.999039	0.987202		1.00007	0.00174572			0.999222	0.994003	0.999054	0.997826	0.999952	0.999754	0.993929	0.993364	1.00201	1.00108	1.00161	1.00265		0.998704	0.000944639		0.999723	1.00319	1.00161	0.997129	0.999594	1.00202	1.00175	0.997028	0.998923	1.00337	1.00365
1.47813	0.995858	0.994719	0.990045	0.999362	1.00146	1.01888	1.00901	1.00719	1.0035	1.00192	0.996046	1.00752	0.997924	1.00106	1.00265	1.00104		1.00176	0.00169337			0.998299	0.995295	1.00008	0.997551	0.999496	0.999096	0.995189	0.993138	1.0008	1.00043	1.00059	1.00523		0.998767	0.000923783		0.997843	1.00315	1.00144	0.997215	0.998726	1.00105	1.00179	0.998897	0.999908	1.00117	0.999166
1.48617	0.99572	0.997797	0.992015	0.996977	0.998378	1.00995	1.00056	1.00418	0.999756	1.00168	0.994177	1.00085	0.995284	0.997387	1.00119	0.997992		0.998994	0.00106342			0.996931	0.993223	1.00257	1.00179	0.992753	0.996786	0.994705	0.991052	1.002	1.0035	1.00006	1.00181		0.998098	0.00126794		1.00131	1.00269	1.00053	0.999103	0.999915	1.0021	1.00285	1.00364	1.00238	0.999858	1.0053
1.4942	0.993836	0.996172	0.986642	0.995464	1.00437	1.01826	1.00726	1.00818	0.999813	1.00106	0.993236	1.00604	0.996282	1.0009	1.00183	0.999806		1.00057	0.00184843			0.999151	0.999959	1.00106	0.998341	0.998638	1.00287	0.998651	0.990972	1.00095	1.00171	0.998287	1.00327		0.999488	0.00092239		0.998269	0.998637	0.994201	0.993487	0.994944	1.00137	1.00309	0.998748	1.00025	0.997374	1.00221
1.50223	0.997475	0.997866	0.989124	0.999366	1.00114	1.01333	1.00217	1.00554	1.00094	1.00122	0.999097	1.00719	0.999818	0.998576	0.99252	0.99455		0.999995	0.00142401			0.997903	0.996535	0.998782	0.998594	0.999772	1.00317	1.00048	0.991276	1.00248	1.00178	1.00226	1.00051		0.999462	0.000943345		0.997571	1.00278	1.00027	0.997279	0.999187	1.0041	1.00116	1.0001	1.00507	1.00074	1.00303
1.51027	0.997894	0.999332	0.992798	0.999804	1.00229	1.01489	1.00428	1.00628	1.00098	1.001	0.997956	1.0118	0.999403	0.999697	0.999104	0.995659		1.00145	0.00140448			0.996819	0.993847	1.00278	0.999178	0.996205	0.995914	0.994748	0.995398	0.999419	1.00134	1.00227	1.00324		0.998429	0.000970751		1.00008	1.00343	1.002	1.00138	1.00171	0.999501	1.00075	0.998022	1.00007	0.998441	1.0014
1.5183	0.993217	0.995744	0.98905	0.995309	0.999826	1.01279	1.00277	1.00533	1.00588	1.00154	0.996924	1.01206	0.999456	0.998537	0.996227	0.995951		1.00004	0.00162078			0.999374	0.995686	0.999429	0.999008	0.999993	1.00003	0.992393	0.991492	1.00037	1.00351	0.998588	0.996133		0.998	0.000999912		0.999606	1.00332	1.00161	0.998112	1.00333	0.999072	1.00209	1.00464	1.00256	1.00224	1.005
1.52633	0.995126	0.998064	0.991923	1.00163	1.00548	1.01826	1.00711	1.00846	1.00101	0.998056	0.999116	1.00407	0.995813	1.00244	0.994764	0.998718		1.00125	0.00162114			0.997496	0.997503	0.999222	0.999639	0.997013	0.999356	0.994827	0.99798	1.00073	1.00177	0.999692	0.998288		0.998626	0.000532687		1.00047	1.00297	1.00214	0.99622	1.00255	0.999535	1.00011	1.00129	0.996632	1.00191	1.00062
1.53437	0.994062	0.997908	0.987825	0.99909	1.0004	1.02099	1.00323	1.00944	0.999172	0.998493	0.999502	1.00587	0.998492	0.999427	0.998481	1.00816		1.00128	0.00183909			0.99807	0.998125	1.00066	0.996679	1.00243	0.995459	0.997884	0.995145	1.00316	1.00267	1.00225	0.99964		0.999349	0.000828291		0.996459	1.00386	0.999686	0.994396	0.997477	0.999676	1.00219	1.00551	0.998449	0.999846	1.00318
1.5424	0.995705	0.998099	0.990747	1.00009	0.996847	1.01856	1.00317	1.00769	0.999152	0.999177	1.00267	1.01113	0.999865	0.998391	0.993495	1.00055		1.00096	0.00170097			0.995299	0.993146	1.00058	1.00009	1.00014	0.996931	0.989798	0.994615	0.999271	1.00179	0.998311	1.00064		0.997551	0.0010552		0.998186	1.00125	1.00136	0.996163	1.00343	1.00218	1.00256	1.00381	1.00242	1.00096	1.00391
1.55043	0.996436	0.997268	0.98913	1.00008	0.999682	1.02014	1.00252	1.00802	0.99845	0.997005	1.00142	1.00712	0.998872	0.998143	0.992567	1.00708		1.00087	0.00179904			0.997124	0.996246	0.998415	0.996244	0.999057	1.0009	0.995547	0.994191	1.00019	1.00144	0.998177	0.99947		0.998084	0.000650929		0.99858	1.00351	1.00253	0.997383	1.00014	1.00409	1.00327	1.00148	1.00193	1.00448	1.00483
1.55847	0.994343	0.998898	0.989813	0.99963	1.00234	1.01918	1.00706	1.00739	0.998366	0.999378	0.99441	1.00673	0.998416	0.997833	0.998663	1.00374		1.00101	0.00170953			0.998501	1.00008	1.00089	0.998164	1.00199	0.998162	0.996781	0.989444	1.00201	1.00301	1.00154	0.996777		0.998945	0.00105897		0.996131	0.99992	1.00003	0.997185	0.999238	0.998312	1.00088	1.00427	1.00344	1.00156	1.00159
1.5665	0.9957	0.997239	0.992046	0.997678	1.00244	1.01751	1.00292	1.00751	1.00236	0.998481	0.996853	1.00513	0.998114	0.998597	0.996807	1.0008		1.00064	0.00148099			0.995043	0.992243	0.997883	1.00266	0.998736	1.00578	0.999181	0.991508	0.998721	1.00298	0.997658	0.999986		0.998531	0.00121289		0.996432	1.00386	1.00155	0.994075	0.997656	0.998882	1.00028	1.00327	1.0002	0.999507	1.0028
1.57453	0.995161	0.995928	0.992366	1.0006	1.00524	1.01847	1.00443	1.00783	0.999624	0.997681	0.993792	1.00475	0.994703	0.998419	0.995636	1.00099		1.00035	0.00166242			0.999415	0.996619	1.00102	0.999254	1.00366	0.99875	0.997091	0.992569	1.00074	1.00443	0.998305	0.999198		0.999254	0.00090875		0.995359	0.998972	1.00087	0.993574	0.997946	1.00072	1.00313	1.00204	0.9982	1.00012	1.0067
1.58257	0.994994	0.995054	0.990223	0.998819	1.00207	1.02228	1.00502	1.00709	1.00044	0.996654	0.993172	1.0036	0.993919	0.999803	0.993832	1.00137		0.999896	0.00190423			0.996959	0.999254	1.001	1.00069	0.998328	0.995232	0.999939	0.994476	1.00206	1.00382	0.998972	0.998987		0.999144	0.000775948		0.995145	1.00124	0.999202	0.995637	0.998008	1.00245	1.00426	1.00527	1.00055	1.00309	1.00313
1.5906	0.995899	0.992648	0.990132	0.99977	1.00443	1.02208	1.004	1.00639	1.00037	1.00059	0.991759	1.00222	0.996874	0.998359	0.997834	0.999534		1.00018	0.00185131			0.997071	0.997981	1.00259	0.9995	1.00138	1.00348	1.00097	0.990697	1.00103	1.00263	0.9999	0.997428		0.999555	0.00100494		0.997083	1.00092	0.999728	0.994854	1.00007	0.999447	1.0028	0.999073	0.997426	0.998351	1.00299
1.59863	0.998297	0.996375	0.995631	1.00687	1.00299	1.0225	1.00035	1.00652	1.00342	0.996486	0.99484	1.00321	0.997689	1.00037	0.992954	1.00114		1.00123	0.00174844			0.997627	0.993567	1.00313	0.999674	1.00001	0.998587	0.997788	0.998939	1.00308	1.00544	1.00229	1.00185		1.00017	0.000922881		0.995239	0.997874	0.998955	0.99182	0.997402	0.999599	1.00085	1.0008	0.996672	1.00449	1.00123
1.60667	0.992085	0.992338	0.990085	1.00021	1.00188	1.02042	1.00036	1.00567	1.00264	1.00383	0.994942	1.00306	0.996386	1.00132	0.992952	1.00533		1.00022	0.00184962			0.99504	0.997118	1.0013	0.997879	0.99901	1.00354	0.997264	0.992329	1.00287	1.00628	1.00421	1.00019		0.999752	0.00117934		0.999776	1.00113	0.999908	0.997403	0.998667	1.00188	1.00397	0.998661	0.999348	1.00045	1.00002
1.6147	0.99604	0.994992	0.991703	1.00226	1.00564	1.02334	1.00076	1.00852	1.00182	1.00119	0.997223	1.0068	0.998014	0.998787	0.994706	1.00206		1.00149	0.00185415			0.996876	0.995493	1.00132	0.999674	0.999958	0.993846	0.996736	0.994196	1.00355	1.00256	1.00154	0.999799		0.998796	0.000946646		0.999908	1.00065	0.999706	0.993846	0.995922	1.00715	1.00376	1.00222	1.00097	1.00262	1.00308
1.62273	0.994978	0.994131	0.990869	1.00099	1.00468	1.02789	1.00497	1.0072	1.00008	0.999294	1.00037	1.00666	0.999084	1.00057	0.996366	1.00641		1.00216	0.00208787			0.999066	0.991864	1.00026	0.998132	1.00217	1.00046	0.995356	0.995162	1.00337	1.00157	1.00109	1.00279		0.999274	0.00101852		0.998488	1.001	1.00069	0.995708	0.99952	0.998744	1.00486	1.00269	1.00099	1.00044	1.00218
1.63077	0.994567	0.998454	0.992324	1.00973	0.999431	1.02292	0.995532	1.00398	1.00374	1.00194	0.997536	1.00618	0.998284	0.997256	0.999639	1.00403		1.0016	0.00182012			0.997367	0.995708	1.00409	0.997768	0.999957	0.999992	0.997188	0.995451	1.00332	1.00178	1.00018	0.997323		0.999176	0.000820716		1.00361	1.00077	1.00209	0.995904	0.998173	1.00237	1.00377	0.998564	0.999227	0.996391	1.00417
1.6388	0.995519	0.994388	0.990249	0.999622	0.996077	1.02524	0.997392	1.00526	1.00245	0.998319	0.992191	1.00534	0.996015	0.996158	0.998101	1.0061		0.999902	0.00204457			0.994132	0.992665	1.00271	0.999781	0.997425	0.994416	0.999746	0.990808	1.00136	1.0031	1.00338	0.998334		0.998155	0.00123967		1.00198	0.99748	0.999993	0.996418	0.999617	1.00523	1.00464	1.00437	0.998021	0.998702	1.00092
1.64683	0.996784	0.998346	0.98852	0.998955	0.9986	1.02607	0.996571	1.00675	1.00083	1.00017	0.996665	1.00234	0.999994	0.997988	0.995968	1.00344		1.0005	0.00196864			0.998508	0.995015	1.00289	0.999055	0.99974	0.998876	0.998819	0.993437	1.00031	1.00418	1.00206	0.999144		0.999335	0.000867545		0.999389	0.996558	0.998349	0.994593	0.995283	0.997937	0.998463	1.00643	1.00301	1.00151	1.00266
1.65487	0.998271	0.99476	0.986807	1.00063	1.00077	1.03179	1.00185	1.00579	1.00359	1.00017	0.997846	1.00772	1.00024	0.999938	1.00113	1.00909		1.00253	0.00233821			0.998128	0.995951	1.00163	1.00016	0.9986	0.995362	0.996746	0.998644	1.00428	1.00686	1.00513	1.00069		1.00018	0.00106678		1.00425	1.00089	1.0044	0.997679	0.999829	0.999285	1.0028	1.00025	1.00069	0.995725	1.0044
1.6629	0.995563	0.994003	0.984897	0.992156	1.00042	1.03229	1.00245	1.00559	1.00451	1.00271	0.99619	1.00723	0.998388	0.999814	1.00584	1.00817		1.00189	0.00255463			0.997985	0.995545	1.00141	0.999737	0.998116	1.00115	0.999341	0.99437	0.99769	0.999	0.999775	0.994816		0.998244	0.000669926		1.00304	1.00131	1.00302	0.997161	1.00115	1.00106	1.00076	1.00247	0.997417	1.00004	1.00363
1.67093	0.995977	0.993446	0.989009	1.00065	1.00306	1.03001	1.00234	1.00612	0.998444	0.999181	0.997053	1.00614	0.99941	0.996913	0.998946	1.00399		1.00129	0.00222026			0.997154	0.99826	0.999853	1.00049	1.00371	1.00176	0.997968	0.992259	1.00174	1.00353	1.00199	0.998675		0.999783	0.000925044		1.00253	1.00057	1.00277	0.99857	1.00242	0.996721	1.00267	1.00063	0.999601	0.997351	1.00345
1.67897	0.998125	0.995067	0.9925	1.00192	1.00193	1.02877	1.0007	1.00734	1.0003	0.998845	0.995431	1.00772	0.997148	0.998013	0.997453	1.00677		1.00175	0.00211223			0.999083	0.998563	1.00182	1.00044	1.00076	0.998351	0.99593	0.992145	0.999587	1.00186	0.999173	0.996042		0.998646	0.00080701		0.99999	0.999737	1.0019	0.994037	1.00092	0.997879	1.00011	1.00267	1.00131	1.00065	1.00374
1.687	0.995508	0.995494	0.989525	0.999384	1.00138	1.03238	1.00297	1.00733	1.00033	1.00111	0.991706	1.0035	0.997825	1.00062	0.994668	1.00503		1.00117	0.00240016			0.996893	0.995056	1.00218	0.999852	0.999824	0.995037	0.992735	0.995238	1.00001	1.00236	1.00355	1.00019		0.998577	0.00100351		1.00466	0.998498	1.00185	0.996499	1.00061	0.999599	1.00279	1.00285	0.997428	1.00085	1.00456
1.69503	0.996371	0.996238	0.98696	0.996789	1.00053	1.03164	1.00158	1.00709	0.999481	1.00049	0.998657	1.00995	0.999032	1.00298	1.0021	1.01277		1.00267	0.00243788			0.998777	0.996073	0.997635	0.996575	1.0009	1.00202	0.997872	0.9955	1.00098	1.00192	1.00363	0.999846		0.999311	0.000759184		0.998046	0.995811	0.99769	0.996413	0.998852	1.00016	1.00059	1.00024	0.998991	1.00293	1.00199
1.70307	1.00194	0.998955	0.987267	0.997382	0.999176	1.03046	1.00201	1.00549	1.00305	1.00037	0.997719	1.00146	0.997814	0.996303	1.00282	1.00755		1.00186	0.00221853			0.996851	0.998522	0.999639	1.00057	1.00168	1.00156	0.99247	0.990479	1.00144	1.00168	1.00141	0.998864		0.998764	0.00108366		1.00735	0.998597	1.00333	1.00001	1.00162	1.00143	1.00201	1.00343	1.00319	1.00217	1.00492
1.7111	0.997161	0.995094	0.990414	0.999368	1.00032	1.02888	1.00316	1.00641	0.997388	1.00005	0.998243	1.00228	1.00002	1.00042	0.999691	1.0079		1.00168	0.002084			0.998956	0.99953	1.00005	1.00171	0.997557	0.996738	1.00001	0.99328	1.00141	1.00089	1.00122	0.998697		0.99917	0.000694523		1.00071	0.997918	0.998047	0.993675	1.00067	0.995062	1.00122	1.00532	0.998009	0.998733	1.00437
1.71913	0.99572	0.997726	0.989518	0.99422	1.00122	1.03091	1.00274	1.00775	0.997974	1.00026	0.992862	1.00383	1.0011	1.00066	1.00122	1.00685		1.00154	0.00230346			0.998222	1.00137	1.00086	0.999768	1.00205	0.998515	0.996227	0.994313	1.0024	0.999489	1.00303	1.00131		0.999797	0.000754995		1.00303	0.996965	0.999587	0.998792	0.997394	0.998976	1.0026	1.00423	1.00125	0.998361	1.00496
1.72717	0.997745	0.99511	0.986764	0.996151	1.00138	1.03516	1.00113	1.00965	1.00092	0.99843	0.999736	1.0019	1.00015	1.00146	0.993865	1.0043		1.00149	0.00256667			0.996443	1.00344	1.00263	1.00014	0.998519	1.00357	0.99361	0.996373	1.00282	1.00323	1.0012	0.99856		1.00004	0.000962172		1.00303	0.996947	0.99963	0.99601	0.998865	1.00173	1.00248	1.00307	0.998594	1.00262	1.00366
1.7352	0.996303	0.99336	0.991373	0.999908	0.994462	1.02546	0.996805	1.00516	1.00386	1.00297	0.996733	1.00611	1.00082	1.00229	0.993861	1.00528		1.00092	0.00201827			0.994543	1.00135	0.999823	1.00002	0.999617	0.995834	0.995361	0.994528	0.998505	0.998669	1.00272	0.99815		0.99826	0.000774041		1.0027	0.994152	0.998975	0.998392	1.00033	0.999219	1.00464	1.00272	1.00057	1.00054	1.00217
1.74323	0.996104	0.992636	0.98576	0.99475	0.997308	1.02868	1.00172	1.00758	1.00341	0.999534	0.997452	1.00481	0.998054	1.00278	0.996605	1.01035		1.0011	0.00236483			0.997579	1.00221	1.00035	0.999275	1.0014	1.00211	0.993674	0.995654	0.998655	1.00191	1.00333	0.998791		0.999578	0.00083745		1.00208	0.99898	0.998543	0.999203	0.999995	1.003	1.00417	1.00337	0.998535	0.998486	1.00366
1.75127	0.998445	0.995133	0.990211	1.00263	1.00125	1.03011	1.00087	1.00757	1.00355	1.00117	0.997788	1.00659	1.00243	1.00431	0.99478	1.00522		1.00263	0.00216595			0.998313	1.00378	0.999525	0.997229	0.997815	1.00069	0.995147	0.993757	1.00009	1.00043	1.00142	0.999428		0.99897	0.00079122		1.00106	0.997158	1.00089	0.995888	1.00132	1.00283	1.00512	1.00285	0.998638	0.999978	1.00566
1.7593	0.999009	0.994935	0.990952	0.999732	0.997173	1.02761	0.997565	1.00539	1.00073	0.999054	0.995657	1.00301	0.999026	1.00483	0.998614	1.01737		1.00191	0.00224735			0.997404	1.00544	0.997884	0.99891	1.00096	1.00226	0.993967	0.997223	0.999426	1.00119	1.00025	0.998663		0.999466	0.00083656		1.00554	0.999944	1.00433	0.998293	1.00426	1.00209	1.00364	1.00342	0.996702	0.995061	1.00542
1.76733	0.997689	0.994539	0.986435	1.00058	0.994222	1.03015	0.995562	1.00404	0.998275	0.999153	0.99766	0.999437	0.999037	1.00193	0.995668	1.00554		0.999995	0.00229273			0.996632	0.995338	0.997942	0.998918	1.00031	1.00168	0.994144	0.998741	1.00021	1.00143	1.00241	0.999857		0.998968	0.00074078		1.00155	0.996472	1.00111	0.994463	1.00264	0.998917	1.00424	1.00369	1.00011	1.00268	1.00534
1.77537	0.998835	0.994544	0.98739	1.00158	0.994851	1.03052	0.994292	1.00495	1.0037	1.00039	0.997483	1.00469	1.00253	1.00306	0.993861	1.00571		1.00115	0.00234066			0.997258	0.998292	0.996994	1.00063	1.00232	1.00307	0.998036	0.998703	0.998415	1.00082	1.0011	0.996564		0.99935	0.000623471		1.00273	0.998626	0.999947	0.996486	0.999916	1.00052	1.00122	1.00061	0.997172	0.998561	1.00271
1.7834	0.997978	0.994831	0.989782	0.998533	0.998218	1.03408	0.999216	1.00569	1.00191	1.00226	0.997108	1.00539	0.998234	0.998914	0.998879	1.00725		1.00177	0.00240617			0.996992	1.00249	0.997389	1.00221	0.999884	0.99908	0.998017	0.995898	0.999947	1.00263	1.00259	0.998913		0.99967	0.000685601		1.00155	0.996606	1.00104	0.996953	1.00006	1.00154	1.00087	1.0054	1.00144	0.998018	1.00249
1.79143	0.997002	0.993969	0.986657	1.00006	0.997041	1.03374	0.997564	1.00481	1.00144	1.00215	1.00287	1.00748	1.00303	0.998514	0.999378	1.01429		1.0025	0.00257134			0.992835	0.994999	0.999286	1.00135	1.0029	1.00058	0.998366	0.992506	0.99964	0.997928	0.99964	0.998543		0.998215	0.000932316		1.00352	0.99516	0.997752	0.99616	0.998878	1.00014	1.00119	1.00567	0.99789	0.998313	1.00479
1.79947	0.998255	0.99827	0.989242	0.998377	0.995702	1.03104	0.997121	1.0057	0.997171	1.0029	1.00005	1.00466	1.00149	0.996819	0.997571	1.01103		1.00159	0.00231397			0.997421	0.99918	0.998532	1.00079	1.00325	1.00077	1.00029	0.998805	0.999369	1.00188	1.00418	1.0031		1.00063	0.000609281		1.0106	0.998204	1.00303	0.999339	1.00463	0.999374	1.00253	1.00614	1.00097	0.999882	1.0057
1.8075	0.99965	1.001	0.991836	1.00348	0.989544	1.0281	0.989721	1.00244	1.00144	1.00149	1.00076	1.0034	1.00147	0.997442	0.99662	1.0093		1.0011	0.00223011			0.997826	1.00106	0.998596	1.00165	1.00252	1.0009	0.994673	0.994544	1.00355	1.0049	1.0056	1.0013		1.00059	0.00103454		1.00595	0.99678	1.00285	0.999564	1.00349	0.99898	1.00076	1.00186	1	0.997503	1.00525
1.81553	0.996884	0.995699	0.990795	1.00062	0.994338	1.03663	0.994613	1.00666	1.00116	1.00515	1.00081	1.00616	1.00274	0.997521	0.998102	1.01153		1.00246	0.00264564			0.997263	1.00032	0.99644	1.00208	0.998848	1.00158	0.997561	0.995763	0.997904	1.00213	1.00299	0.996538		0.999119	0.00074319		1.0052	0.998242	1.00121	0.996128	1.00067	1.00058	1.0033	1	0.995665	0.999838	1.00379
1.82357	0.996737	0.996851	0.990188	1.00011	0.994828	1.03321	0.996216	1.00475	0.998637	1.00417	1.00112	1.00411	1.00303	0.993811	0.996629	1.00638		1.0013	0.00240968			0.997581	0.996152	0.9967	1.00166	0.997088	0.99826	0.989547	1.0008	1.00084	1.00212	1.00273	0.998948		0.998535	0.00104331		1.00493	1.00082	1.00062	1.00078	1.003	0.999802	1.0014	0.998618	0.998295	0.997417	1.00557
1.8316	0.996686	0.997205	0.989254	0.997005	0.993679	1.03403	0.993021	1.00387	1.00033	1.00355	1.00165	1.00496	1.00118	0.996745	0.996958	1.00795		1.00113	0.00250751			0.994224	0.997743	0.998522	1.00048	0.996541	1.00241	0.993726	0.993311	1.00226	1.00117	1.00009	0.998312		0.998233	0.000931882		1.00597	0.998591	0.998651	0.998746	0.999983	1.00056	1.00161	1.00411	0.99584	0.997266	1.00375
1.83963	0.994958	0.9965	0.992876	0.995826	0.993563	1.03316	0.993846	1.00438	0.997671	0.999908	1.00314	1.00753	1.00187	0.994722	0.99786	1.00513		1.00081	0.00243884			0.99676	0.999419	0.997012	0.998184	1.00296	1.00041	0.995385	0.998361	1.00067	1.00258	1.00291	0.993893		0.999044	0.000861017		1.00236	0.996057	1.00073	0.996636	1.0012	1.00058	1.00261	1.00296	0.999718	0.996882	1.00279
1.84767	0.996537	0.996538	0.989569	1.00025	0.991957	1.03673	0.989659	1.00394	0.99953	0.999209	0.998723	1.00345	1.00208	0.995974	0.997108	1.00284		1.00026	0.00267657			0.995703	0.999243	0.996232	1.00167	1.00058	1.001	0.998342	0.997999	1.00005	1.00486	1.00038	0.998934		0.999582	0.000711787		1.00414	0.998344	1.00197	0.998313	1.00193	0.998088	1.00504	1.00209	0.999839	1.00022	1.00517
1.8557	0.996717	0.99745	0.988396	1.0005	0.992072	1.04053	0.99542	1.00365	0.999309	1.00333	1.00318	1.00314	1.00032	0.99699	1.00566	1.01039		1.00232	0.00287745			0.995355	0.99534	0.996105	1.00037	0.999954	1.00649	0.995772	0.995189	1.00018	1.0003	1.0023	1.00116		0.999044	0.0010209		0.998874	0.997523	0.997748	0.996804	1.00302	0.999149	1.00406	1.00404	0.998972	0.997876	1.00271
1.86373	0.997182	0.998918	0.988742	1.00713	0.991712	1.04107	0.995094	1.00549	0.997199	1.00128	1.0042	1.00481	1.00002	0.996754	0.997329	0.997039		1.0015	0.00291362			0.995356	0.992433	0.9967	0.996462	1.00025	1.00031	0.99957	0.998994	1.00079	1.00164	1.00336	0.995837		0.998476	0.000903163		1.00369	1.00159	0.999066	0.998455	1.00116	0.998186	1.00316	1.00353	1.00096	0.998814	1.00088
1.87177	0.994845	0.994167	0.992251	0.999192	0.988214	1.03471	0.988831	1.00287	1.00162	1.00219	1.00386	1.00263	0.999661	0.996576	0.999815	1.0128		1.00089	0.00273126			0.995586	0.999674	0.998064	0.999789	0.997078	1.0041	0.992849	0.994961	0.998039	1.00265	1.00186	0.997643		0.998524	0.000949354		1.00381	0.996618	0.99833	0.997036	1.00193	0.997178	1.00349	1.00042	0.999375	0.995404	1.00434
1.8798	0.997969	0.995515	0.989048	1.00385	0.994211	1.03679	0.989798	1.00475	0.999672	1.00302	0.997952	1.00009	0.999169	0.996836	0.996416	1.0049		1.00062	0.00268254			0.993691	0.997348	0.996977	0.999369	1.00092	1.0004	0.997809	0.995517	0.994704	0.998134	0.997918	0.995456		0.997354	0.000643958		1.00355	0.997034	0.998841	0.995247	0.999301	1.00092	1.00506	1.00851	1.00165	1.00003	1.00339
1.88783	0.994144	0.99621	0.989588	1.00079	0.989495	1.03527	0.988446	1.00461	0.996352	0.998889	1.00492	1.00364	1.00021	0.99652	1.0008	1.01194		1.00074	0.0027877			0.996372	0.995336	0.998998	1.0013	0.998804	1.00491	0.992911	1.00075	1.00322	1.00404	1.00429	1.00074		1.00014	0.00109869		0.997904	0.994559	0.998398	0.995158	1.00013	0.998418	1.00436	1.00198	0.999916	0.994974	1.00257
1.89587	0.994124	0.996293	0.99052	1.00158	0.991545	1.03358	0.994525	1.00614	1.00066	1.00445	1.00327	1.00374	0.998972	0.995711	1.00342	1.0165		1.00219	0.00264499			0.996411	0.996093	0.99629	1.00053	0.998939	1.0007	1.00111	0.998489	1.00374	1.0023	1.00199	0.999421		0.999667	0.000725622		1.00076	0.997588	0.9989	1.00023	1.00051	1	1.00584	1.00384	0.996498	1.00357	1.00314
1.9039	0.996134	0.995731	0.990039	1.00167	0.991967	1.03284	0.995332	1.00723	1.00128	1.00633	1.00036	1.00382	1.00314	0.99492	1.00212	1.01639		1.00246	0.00259891			0.991307	0.992953	0.997372	1.00132	1.00208	1.00143	0.995164	0.999605	0.999132	0.99906	1.00169	0.996067		0.998099	0.00103139		1.00079	0.99794	0.998764	0.996553	1.00099	1.00066	1.00178	1.00473	0.99891	0.99979	1.00133
1.91193	0.996563	0.995559	0.991606	1.00447	0.996578	1.03898	0.996549	1.00745	0.997517	1.00314	1.00023	1.00179	0.996502	0.996565	0.999496	1.01249		1.00222	0.00276989			0.995173	0.996956	0.996995	0.998865	0.995704	1.00021	0.996543	0.99897	1.00384	1.00326	1.00616	1.00052		0.999433	0.00100805		1.00456	0.998998	0.999902	0.997838	1.00371	1.00092	1.00183	1.00273	0.999297	1.00224	1.00521
1.91997	0.994111	0.993813	0.987964	0.998905	0.988937	1.0299	0.989205	1.00362	1.00321	1.00358	0.997438	0.99702	0.996572	0.997679	1.00032	1.00361		0.999118	0.00243379			0.994165	0.998656	0.997955	0.998177	0.998206	1.00201	1.00229	1.00069	1.00219	1.00029	1.00141	0.996803		0.999404	0.000723834		0.998764	0.997482	0.994565	0.99697	0.997741	1.00038	1.00279	1.00556	0.997871	0.995106	1.00261
1.928	0.993557	0.993907	0.989291	0.999415	0.992172	1.03809	0.993677	1.00548	1.00035	1.0022	0.999209	1.00365	0.996558	0.992665	0.996132	1.00718		1.00022	0.00283283			0.994741	0.993241	0.998673	1.00084	1.00201	1.00272	0.99627	1.00275	1.00308	1.00164	1.00567	0.998139		0.999981	0.00108873		0.999074	0.994543	0.997956	0.994698	0.999056	0.99737	1.00251	1.00001	0.998197	0.998048	1.0028
1.93603	0.997821	0.998107	0.987383	1.00644	0.98564	1.03331	0.986945	1.00419	1.00631	1.0016	1.00207	1.00752	1.00053	0.998148	0.996143	1.00258		1.00092	0.00275971			0.991831	0.994037	0.998194	1.00029	0.999584	0.997165	0.995795	1.00103	1.00025	0.999643	1.0032	0.995966		0.998081	0.000933753		1.00073	0.997131	0.996872	0.995083	0.997904	0.997278	1.00039	1.00453	0.999623	0.999009	0.99948
1.94407	0.995145	0.995019	0.989887	0.998749	0.988738	1.03521	0.990156	1.00437	1.00404	1.00273	0.999117	1.00431	0.997948	0.995432	0.991707	0.998559		0.999444	0.00271493			0.993005	0.995276	0.997183	1.00122	1.00187	1.00019	0.998344	0.998406	1.00269	1.00095	1.00338	0.994464		0.998914	0.000974989		1.00533	0.997624	0.999677	0.996286	0.999749	1.00129	1.00444	0.999066	0.998871	0.995074	1.001
1.9521	0.991588	0.996827	0.988643	0.998079	0.990296	1.03236	0.986578	1.00496	0.998343	1.00256	0.996696	1.00337	0.997304	0.996647	0.996348	1.00162		0.998889	0.00258688			0.993758	0.998016	0.996123	1.00036	1.00353	1.00229	0.999453	0.998807	1.00274	1.00259	1.00419	1.00039		1.00019	0.000908588		1.00138	0.998568	0.994031	0.997294	0.998317	1.0011	1.00399	0.998486	0.996375	0.992328	0.99955
1.96013	0.994959	0.995507	0.992306	1.00084	0.992269	1.03436	0.986908	1.00408	1.00365	1.00585	0.999746	1.00637	1.00395	0.995925	0.998736	1.00561		1.00132	0.00262986			0.991128	0.995774	0.996627	1.00087	0.997913	0.998328	0.999479	1.00288	0.997833	0.999091	1.00221	0.993668		0.997983	0.000977336		1.00057	0.997082	0.997031	0.996626	1.00036	0.999025	1.00317	0.998434	0.995598	0.995928	1.00188
1.96817	0.994268	0.99611	0.987615	1.00105	0.992974	1.03615	0.993253	1.00563	0.99992	1.00162	1.00398	1.00595	1.00169	0.994905	1.00367	1.00463		1.00146	0.0026763			0.99437	0.995868	0.996984	0.998213	1.00019	0.999891	0.995258	0.99631	1.00011	0.997554	1.00401	0.998309		0.998088	0.000770229		1.0042	0.997118	0.997545	0.994602	1.00388	1.00039	1.00194	1.00502	0.998605	1.00028	1.0029
1.9762	0.995024	0.997447	0.987151	1.00065	0.989811	1.03393	0.990376	1.00352	0.998267	0.999663	0.999067	1.00088	1.00105	0.994919	0.997084	1.00215		0.999436	0.00257916			0.992249	0.995763	0.998584	0.99795	1.00112	1.00317	0.992902	0.999579	0.9998	1.00024	1.00343	0.996556		0.998446	0.00103288		1.00158	0.99974	0.999812	0.998426	1.00004	1.00015	1.00647	1.00283	0.999785	1.00065	1.00585
1.98423	0.994038	0.99744	0.987608	0.998638	0.991313	1.04021	0.994207	1.00522	1.00137	1.00554	1.00285	1.00612	0.999821	0.991137	0.997485	0.998433		1.00072	0.00296374			0.992257	0.995309	0.99811	1.00187	0.998977	1.00272	0.992367	0.999034	1.00229	0.999156	1.00245	0.995794		0.998361	0.00108022		1.00272	0.997605	0.994536	0.995206	0.998621	1.00058	1.00317	0.999529	0.998542	0.9977	1
1.99227	0.993683	0.993509	0.989751	1.00164	0.991546	1.03466	0.989527	1.00456	0.998267	1.00471	0.994699	1.00298	0.997977	0.994645	0.995668	1.0053		0.99957	0.00268612			0.994433	0.991374	0.999301	1.00011	0.999694	0.996481	1.00097	1.00659	1.00027	0.99618	1.00217	0.994015		0.998466	0.00119891		1.0032	1.00089	0.995606	0.996738	1.00306	0.995476	1.00314	1.00252	1.00033	1.00015	1.00214
2.0003	0.992067	0.9935	0.98786	1.00148	0.983642	1.03503	0.985347	1.00365	0.998436	1.00246	0.999008	1.00326	0.999475	0.996756	0.996189	0.996553		0.998419	0.00288318			0.994461	0.997738	0.998106	1.00078	0.999393	0.99763	0.997566	1.00168	1.00246	0.998747	1.00499	0.996811		0.999197	0.000824334		1.00423	0.997186	0.995356	0.996073	0.999929	0.998997	1.00431	0.99851	0.997152	0.996606	1.00195
2.00833	0.993307	0.994203	0.982799	1.00065	0.987785	1.03297	0.985507	1.00445	0.999006	1.00508	0.996494	1.00597	1.00035	0.99725	0.997463	1.00039		0.99898	0.00282324			0.99334	0.992245	0.998346	1.00077	1.0046	1.00406	0.998805	0.997411	0.999937	1.00057	1.00483	0.99507		0.999165	0.00120983		1.00731	0.998926	0.997609	1.00056	1.00243	0.998556	1.00453	0.999247	0.998122	0.996893	1.00226
2.01637	0.998156	0.997804	0.990996	1.00278	0.991149	1.03944	0.987244	1.0042	0.999298	1.00529	0.999324	1.00128	0.999056	0.994531	0.995407	0.990222		0.999761	0.00294963			0.99525	0.995932	0.9984	1.0012	1.00012	1.00169	0.995165	1.00204	0.997137	0.995196	0.996961	0.987476		0.997214	0.00116025		1.00138	0.996584	0.995842	0.996044	1.00032	1.00007	1.00301	1.00287	0.999372	0.999303	1.00009
2.0244	0.997893	0.997284	0.990123	1.00282	0.987286	1.03777	0.9891	1.00621	0.994484	0.999068	1.00014	1.00466	0.99678	0.992079	0.994279	0.997217		0.9992	0.00290069			0.994383	0.997166	0.998252	0.999822	1.00398	1.00485	0.999791	0.998067	1.00254	0.997021	1.00045	0.996467		0.999399	0.000910747		1.0031	0.995308	0.996483	0.994464	1.0006	1.00131	1.00366	1.00334	0.998339	0.993992	1.00127
2.03243	0.997502	0.998957	0.988842	1.00463	0.991474	1.03249	0.990465	1.00603	0.9971	1.00366	1.00129	1.00252	0.999402	0.992725	0.998992	0.998069		1.00026	0.0024962			0.993327	0.995086	0.99866	0.999965	1.00066	1.00139	1.0008	1.00147	1.00246	0.99967	1.00098	0.99511		0.999132	0.000860269		1.00445	0.998115	0.997067	0.997398	1.00195	1.00179	1.00593	1.00092	0.995633	0.996263	1.00074
2.04047	0.9981	0.996487	0.990042	1.0019	0.985834	1.03751	0.987388	1.00455	1.00114	1.00735	0.999044	1.00951	1.00136	0.994298	0.997718	0.997491		1.00061	0.00295283			0.995726	0.988115	0.999182	0.999096	0.999815	0.99744	1.00169	1.00068	1.00327	0.997446	1.00357	0.997073		0.998591	0.00118576		1.00564	0.998257	0.995035	0.996545	1.00162	0.998317	1.00438	1.00728	0.998912	0.997857	1.00399
2.0485	0.996053	0.995204	0.986022	1.00031	0.992777	1.03983	0.988886	1.0061	1.00176	1.00328	0.998686	1.00459	0.995973	0.993247	0.998153	1.00047		1.00008	0.0029826			0.99385	0.997525	0.997909	1.00036	0.999082	1.00342	0.99517	0.999408	1.00151	0.997718	1.004	0.994598		0.998713	0.000943148		1.00563	0.998769	0.997861	0.999565	1.00208	1.00015	1.00313	1.00446	0.998645	0.99607	1.00321
2.05653	0.992868	0.996809	0.988056	0.999261	0.983834	1.03465	0.980789	1.00292	0.995857	1.00262	0.996547	1.00595	0.998579	0.992999	0.994858	0.997757		0.997772	0.00297066			0.996185	0.994918	0.998477	1.00171	1.0027	1.00235	0.991964	0.999802	1.00519	0.99848	1.00331	0.995337		0.999202	0.00115942		1.00494	0.994748	0.995255	0.995713	1.001	1.0011	1.00412	1.00287	0.996163	0.995719	1.0013
2.06457	0.996129	0.992957	0.986831	1.00088	0.986485	1.02932	0.981931	1.00392	1.00294	1.00307	1.00288	1.005	0.997953	0.991968	0.998785	1.00033		0.998837	0.00267948			0.994846	0.989016	0.999387	1.0003	0.998802	0.995532	0.999323	1.00012	1.0055	0.998434	1.00344	0.996492		0.998434	0.00122166		1.00502	0.998481	0.997038	0.999439	0.999401	1.00015	1.00489	1.00063	0.995934	0.995399	0.999349
2.0726	0.992698	0.998079	0.986244	0.99744	0.986284	1.03432	0.984878	1.00388	1.00072	1.00263	0.999052	1.00573	1.00098	0.991508	0.993743	0.994206		0.998274	0.002888			0.990739	0.991144	1.00041	0.998517	0.997678	0.999749	0.994206	0.998243	1.00145	0.99932	1.00186	0.995285		0.997384	0.00108301		1.00298	0.996568	0.995846	0.996672	1.00218	0.999616	1.0032	1.0061	1.00035	0.99982	1.00388
2.08063	0.997712	0.995977	0.986816	1.00113	0.984844	1.03083	0.98671	1.0052	0.998031	1.00437	1.00288	1.00628	1.00266	0.98989	0.995047	0.996912		0.999081	0.00272423			0.991448	0.993794	1.0017	1.00255	1.00258	0.998968	0.992526	0.998085	1.00538	0.997374	0.999438	0.996227		0.99834	0.00124804		1.00492	0.992791	0.99671	0.996784	1.00201	1.00107	1.00546	1.00018	0.997015	0.998358	1.00176
2.08867	0.994285	0.997458	0.988191	1.00104	0.985956	1.03191	0.985814	1.00463	0.998901	1.00354	1.00474	1.00435	0.999394	0.992795	0.991909	0.991949		0.998553	0.00275518			0.991624	0.99393	1.00167	0.999642	1.00131	1.00257	0.996319	1.00044	1.00741	0.998128	1.00239	0.994849		0.999189	0.00127519		1.00938	0.999429	0.995631	0.997861	1.00263	0.999819	1.00397	1.00767	0.997829	0.999335	1.00211
2.0967	0.995575	0.993043	0.985881	1.00166	0.987489	1.03333	0.986294	1.00675	1.00281	1.00672	1.00309	1.00032	0.995381	0.992986	0.991238	0.995482		0.998628	0.00286591			0.99292	0.991677	1.00127	1.0006	1.00424	0.99935	0.991426	1.00217	1.00342	0.995483	1.0006	0.992722		0.99799	0.00138975		1.00467	0.995137	0.993757	0.997931	1.00346	1.00079	1.00416	1.00156	0.994336	0.999932	1.00287
2.10473	0.995058	0.992623	0.988834	0.998729	0.991718	1.03639	0.98877	1.00597	0.997944	1.00269	0.998048	1.0011	0.996547	0.99126	0.992553	0.997465		0.998482	0.00280613			0.994663	0.995158	1.00242	0.999985	1.00369	0.997808	0.999455	0.998458	1.00523	0.997606	1.00236	0.994958		0.999315	0.00101992		1.00482	0.995809	0.9932	0.9979	0.998129	1.00246	1.00275	1.00501	0.997411	0.99858	1.00261
2.11277	0.994798	0.991564	0.98732	0.998827	0.985116	1.03132	0.981788	1.00375	0.998549	1.00568	0.997268	1.00125	0.997973	0.989529	0.988457	0.997477		0.996916	0.00285283			0.994341	0.993651	1.0009	0.998121	1.004	1.00523	0.995556	0.997917	1.00506	0.995854	1.00317	0.994564		0.99903	0.00127672		1.00534	0.995356	0.996023	0.994888	0.999672	1.0005	1.00582	1.0041	0.997858	0.999772	1.00171
2.1208	0.99736	0.993775	0.992345	1.00194	0.987683	1.03685	0.991228	1.00475	1	1.00495	0.999972	1.00456	1.00133	0.988153	0.994308	0.99501		0.999638	0.0028574			0.994254	0.994775	0.999393	1.00226	1.00379	1.00025	0.99697	1.00005	1.00325	0.996148	1.003	0.992245		0.998866	0.00112988		1.00491	0.994989	0.995845	0.998498	0.997721	1.00042	1.00597	1.00097	0.997691	0.998147	0.999738
2.12883	0.997255	0.99138	0.989216	0.997528	0.986975	1.03511	0.987993	1.00572	0.995895	1.00069	0.997998	1.00167	0.997752	0.989369	0.998726	0.993645		0.997933	0.00281335			0.994605	0.99749	1.00141	0.997417	1.00296	0.997249	0.996231	1.00115	1.00522	0.996434	1.00003	0.993649		0.998653	0.00100923		1.00666	1.00134	0.995694	0.997623	1.00253	1.00188	1.00421	1.00528	0.998305	0.999972	1.00424
2.13687	0.99509	0.99371	0.992325	0.998634	0.987302	1.03591	0.985584	1.00553	0.996716	1.00494	0.998702	1.0036	0.999913	0.989896	0.990755	0.995533		0.998383	0.00290767			0.993703	0.989189	1.00168	0.99885	1.00385	1.00181	0.992538	0.99915	1.00659	0.998117	1.00543	0.994121		0.998752	0.00157524		1.00272	0.998952	0.995392	0.994085	0.997826	1.00108	1.00425	1.00095	0.997389	0.999616	1.00337
2.1449	0.996972	0.995289	0.99442	1.00246	0.985112	1.02973	0.983106	1.00279	0.998251	1.00592	0.999426	1.00395	1.00089	0.992633	0.986309	0.983697		0.99756	0.00283904			0.99482	0.990397	1.0009	1.00051	1.00742	1.00609	0.992243	1.00208	1.00549	0.997072	1.00419	0.992433		0.999471	0.00171224		1.00654	1.0012	0.995961	0.998911	1.00292	1.0022	1.00314	0.999818	0.996081	0.996372	1.00045
2.15293	0.997299	0.994586	0.992804	1.0017	0.985278	1.03738	0.988676	1.00654	0.997498	1.00426	0.999695	1.00169	0.997044	0.990709	0.992766	0.996672		0.999037	0.00292047			0.992069	0.992977	1.00043	1.00276	1.00518	0.995903	0.994609	1.00321	1.0061	0.996002	1.00515	0.993997		0.999031	0.00152605		1.00542	0.997944	0.996675	1.00004	1.00439	1.00061	1.00445	0.997423	0.993851	0.995911	0.998257
2.16097	0.993921	0.990151	0.991638	0.99954	0.985933	1.03724	0.983263	1.00533	0.998341	1.00641	0.999469	1.00332	0.998508	0.993049	0.993275	0.994299		0.998355	0.00305321			0.994748	0.999592	1.00187	0.9992	1.00304	0.996135	0.995675	1.00194	1.00577	0.994873	1.00242	0.990247		0.998792	0.00129537		1.00514	0.997927	0.994653	0.997595	1.00057	1.00021	1.00305	1.00477	0.993831	0.999307	1.00054
2.169	0.993941	0.992175	0.994486	1.00048	0.987252	1.03224	0.982267	1.00246	0.993815	1.00151	1.00092	1.0046	0.996127	0.992351	0.989846	0.992815		0.997331	0.00275986			0.994495	0.996725	1.00261	0.997663	1.00221	0.997858	0.996975	1.00101	1.00544	0.994512	1.00017	0.99244		0.998508	0.0011115		1.00459	1.00015	0.992679	0.995391	0.99983	1.00144	1.00418	0.999126	0.993787	0.996861	1.00094
2.17703	0.995225	0.993176	0.99358	0.998466	0.988771	1.03166	0.985604	1.00423	0.994444	1.00374	1.0013	1.00339	0.999371	0.992442	0.994305	0.991316		0.998188	0.00261191			0.995392	0.996872	1.00008	0.999663	1.0049	0.997418	0.995785	0.998912	1.00656	0.99568	1.00328	0.997019		0.999298	0.00108803		1.00506	0.997651	0.993792	0.994276	1.00091	1.00118	1.00518	0.998531	0.994937	0.999013	1.00328
2.18507	0.996213	0.996483	0.994001	1.00057	0.98323	1.03014	0.979065	1.00328	0.995917	1.0028	1.00211	1.0036	0.998244	0.987459	0.994853	0.994723		0.997668	0.00279243			0.995612	0.988747	1.00124	1.00037	1.00245	0.99648	1.00085	1.00148	1.00846	0.995319	1.00174	0.995505		0.999021	0.00144097		1.00519	0.997749	0.996036	0.997702	1.00079	0.999216	1.00493	0.998707	0.993681	0.998735	1.00079
2.1931	0.995626	0.995429	0.996591	0.998781	0.984902	1.02927	0.980664	1.00311	0.997054	1.00337	1.00329	1.00456	1.00152	0.984267	0.991728	0.991593		0.99761	0.00279199			0.995384	0.994586	1.00225	0.999145	1.00537	0.99655	1.00248	1.00219	1.00583	0.994075	1.00137	0.991909		0.999261	0.00134258		1.0021	0.99723	0.993989	0.997447	0.999348	0.996606	1.00143	1.00036	0.995473	0.995006	1.00137
2.20113	0.996607	0.995218	0.998761	0.999214	0.984165	1.0276	0.982426	1.00508	0.997147	1.00139	0.998602	1.0008	0.998333	0.988918	0.99118	0.993323		0.997423	0.00253159			0.99594	0.993393	1.00178	1.00052	1.00253	0.99575	0.996757	1.00399	1.0049	0.99243	0.999609	0.989427		0.998085	0.00141344		1.00925	0.996357	0.998579	0.997193	1.00266	0.995237	0.997996	0.996489	0.993091	0.994871	1.00067
2.20917	0.998271	0.993177	0.996104	0.998306	0.984411	1.02435	0.983117	1.00504	0.994944	1.00097	1.0004	1.00323	0.999026	0.990088	0.988521	0.997569		0.997345	0.00239355			0.996899	0.997873	1.00384	1.00327	1.00692	0.994221	0.993525	1.00033	1.009	0.993776	1.00109	0.991632		0.999364	0.00162575		1.00342	0.992018	0.994266	0.993773	0.99978	1.00071	1.00301	1.00186	0.997525	1.00009	1.00372
2.2172	0.994654	0.991676	0.995808	1.0004	0.985346	1.0225	0.981174	1.0033	0.997216	1.00072	0.99826	1.00313	0.998407	0.989441	0.989788	0.999037		0.996928	0.00231946			0.997856	0.99243	1.00577	1.00004	1.01337	0.999056	0.994965	1.00116	1.00504	0.995003	1.00068	0.994514		0.99999	0.0017022		1.008	0.996234	0.996064	0.995381	0.999813	0.998975	1.00338	0.997584	0.995754	0.995911	1.00233
2.22523	0.998606	0.996598	1.00264	0.999169	0.987399	1.0278	0.983303	1.00482	0.998293	1.00313	1.00143	1.0005	0.998749	0.990461	0.985556	0.994453		0.998306	0.00254605			0.996235	0.994151	1.00685	1.00032	1.00462	0.995882	0.996552	1.00159	1.00425	0.994117	1.0006	0.995747		0.999243	0.00126841		1.00346	0.997529	0.989534	0.995262	0.997999	0.999698	1.00299	0.996298	0.996545	0.998236	1.00181
2.23327	0.99582	0.993651	0.999798	0.999631	0.984635	1.02724	0.983132	1.00495	0.994183	1.00242	1.00022	0.998907	1.00101	0.989989	0.991396	0.993113		0.997506	0.00250769			0.995675	0.988238	1.00369	1.0005	1.01046	0.99903	0.991949	1.00055	1.00845	0.994466	1.00406	0.991293		0.99903	0.00200274		1.00431	0.998196	0.994877	0.993267	0.998002	0.999205	1.00266	0.994839	0.994316	0.993161	0.998908
2.2413	0.997293	0.993635	0.998042	1.00144	0.984875	1.02476	0.98131	1.00561	0.997081	1.00432	1.00116	1.00128	0.998793	0.984277	0.986516	0.992413		0.997051	0.00262638			0.999021	0.992363	1.00485	1.00317	1.00934	1.00097	0.99286	1.00222	1.00668	0.994103	1.0025	0.992249		1.00003	0.00170287		1.00562	0.995436	0.995428	0.993909	1.00112	1.001	1.00236	0.994369	0.999895	0.994815	1.00246
2.24933	0.994702	0.995643	0.998122	1.00273	0.986499	1.02272	0.981843	1.00412	0.996659	1.00315	0.998854	1.00104	0.994057	0.978824	0.98973	0.997716		0.99665	0.00253412			0.999712	0.992017	1.00584	1.00507	1.01001	0.998854	0.996583	1.00829	1.00879	0.995937	1.0014	0.991661		1.00118	0.00185436		1.00406	0.998174	0.994525	0.995376	0.999699	0.993576	0.998877	0.997312	0.994859	0.998491	1.00147
2.25737	0.999575	0.996356	0.998608	0.997507	0.985272	1.02368	0.977757	1.00422	0.995913	1.00533	1.00498	1.00543	0.999785	0.988088	0.991893	0.999973		0.998398	0.00256426			0.999951	0.992127	1.00333	1.00076	1.00714	0.991211	1.00328	1.00265	1.00511	0.994344	1.00304	0.988966		0.999326	0.00174809		1.00111	0.994328	0.993893	0.995313	0.997311	0.991492	0.99298	0.997278	0.994626	0.99719	1.0024
2.2654	0.993406	0.992431	0.996496	0.999478	0.980974	1.02072	0.975538	1.00256	0.993173	1.0034	1.00619	1.00245	1.00073	0.989686	0.989442	0.999133		0.996613	0.00262013			0.997583	0.990259	1.00521	1.00215	1.00879	0.998265	1.0003	1.00644	1.0118	0.997809	1.00069	0.996429		1.00131	0.00172095		1.00338	1.00014	0.999003	0.996078	1.00152	1.00211	1.00267	0.993972	0.995294	0.996531	0.999818
2.27343	0.997113	0.991817	0.997426	0.997271	0.986361	1.02243	0.980092	1.00537	0.997527	1.00677	0.996687	0.998269	1.0012	0.987277	0.988734	0.999272		0.997101	0.00243739			1.00007	0.993396	1.00447	1.00429	1.00517	0.995863	0.994911	1.0005	1.00407	0.99349	0.999962	0.989611		0.998818	0.00151311		1.00401	0.997176	0.99454	0.995817	1.00084	1.00134	1.00449	0.995533	0.99563	0.997399	1.00133
2.28147	0.998354	0.994325	0.999454	1.00273	0.983993	1.01967	0.975118	1.00435	0.99239	1.00073	0.998434	1.00069	0.99774	0.987872	0.98644	0.992309		0.995913	0.00251106			0.996574	0.986556	1.00506	1.00086	1.00652	0.996031	0.999148	1.00477	1.008	0.992656	1.00156	0.99304		0.999232	0.0018717		1.00045	0.993418	0.993733	0.993102	0.996063	0.998527	0.999384	0.995083	0.995483	0.998945	0.999735
2.2895	0.996005	0.992455	0.997391	0.99827	0.987277	1.01972	0.982359	1.00553	0.996345	1.00432	1.0037	1.00149	0.999449	0.990415	0.989425	0.998601		0.997672	0.00218173			0.999183	0.990288	1.00649	1.00152	1.00882	0.994139	0.994845	1.00435	1.00707	0.992964	1.00393	0.991021		0.999552	0.00192688		1.00574	0.995558	0.995413	0.994781	0.999998	1.00185	1.00489	0.994359	0.994796	0.995652	1.00009
2.29753	0.995622	0.99166	0.996286	0.995735	0.986033	1.0229	0.976496	1.00509	0.994749	1.00449	0.999393	1.00177	0.997811	0.988338	0.989883	0.998226		0.99653	0.00251919			0.997217	0.99164	1.0056	1.00175	1.00959	0.99424	0.994653	1.00114	1.00944	0.994439	1.00163	0.991609		0.999413	0.00185903		1.00102	0.990528	0.992085	0.992931	0.999098	0.999354	1.00328	0.999431	0.997534	0.996973	1.00148
2.30557	0.992062	0.99005	0.994809	0.997335	0.9836	1.02232	0.977086	1.00136	0.996097	1.00296	1.00198	0.996774	0.999259	0.990098	0.987562	0.999354		0.995795	0.00249935			1.00024	0.993544	1.00725	1.00015	1.00889	0.998704	0.996328	1.00024	1.00848	0.993238	0.99827	0.990937		0.999688	0.001719		1.00707	0.992855	0.995642	0.996574	0.998864	1.00073	1.00283	0.995449	0.995316	0.995082	1.00086
2.3136	0.995699	0.992645	0.996503	1.00107	0.983525	1.02184	0.976365	1.00415	0.996941	1.00507	1.00175	0.999394	0.998727	0.986385	0.988654	0.996713		0.99659	0.00257343			1.00022	0.999708	1.00569	1.00275	1.00954	0.999949	0.993092	0.998334	1.0082	0.996646	1.00453	0.991919		1.00088	0.00159669		1.0046	0.992575	0.991882	0.991962	0.998108	1.00243	1.00353	0.994805	0.994149	0.996235	0.999803
2.32163	0.998216	0.994947	1.00143	0.999876	0.982738	1.01963	0.97194	1.00293	0.993913	1.00423	0.997858	1.00092	0.997286	0.988263	0.986224	0.996242		0.99604	0.00263662			0.99841	1.00293	1.00474	0.999912	1.01142	0.997277	0.997789	0.999225	1.00578	0.994422	1.00281	0.990611		1.00044	0.00159316		1.00604	0.996229	0.994929	0.99726	1.00079	1.00135	1.00507	0.99512	1.00008	0.997292	1.00109
2.32967	0.995645	0.994741	0.995432	0.99918	0.983767	1.01627	0.975297	1.00081	0.996285	1.00408	0.997378	0.992645	0.993582	0.986873	0.990778	0.995753		0.994907	0.00223626			1.00023	1.00005	1.006	1.00042	1.01029	0.99621	0.992797	1.00201	1.00952	0.99564	1.00229	0.993966		1.00079	0.00164307		1.0052	0.994709	0.998002	0.996706	0.999273	0.999585	1.00356	0.996624	0.996118	0.996748	1.00401
2.3377	0.993841	0.995225	0.996937	0.997169	0.981611	1.01841	0.970144	1.00138	0.996028	1.00641	1.00457	0.997003	0.996584	0.98764	0.98963	0.989111		0.995106	0.0026945			1.0007	1.00092	1.00682	1.00396	1.01282	1.00113	0.995643	1.00047	1.0115	0.997147	1.00588	0.99696		1.00283	0.00159644		1.00011	0.988314	0.988575	0.990542	0.996668	0.99807	1.00249	0.993858	0.996228	0.998064	1.00141
2.34573	0.999211	0.9967	1.00078	0.998172	0.976972	1.01424	0.968164	1.00201	1.00127	1.00714	1.00296	1.0009	0.999482	0.986837	0.990745	0.99265		0.99614	0.00281598			0.99939	1.00369	1.00663	1.00539	1.01035	0.996037	0.992683	1.00202	1.01055	0.993444	1.00439	0.99334		1.00149	0.00186374		1.00696	0.996495	0.993963	0.99667	0.99667	1.00158	1.00345	0.990694	0.994419	0.996315	1.00198
2.35377	0.996291	0.994658	0.997642	0.997035	0.977364	1.01663	0.970626	1.00297	0.997009	1.00517	1.00243	0.998939	0.999977	0.986505	0.981699	0.987701		0.99454	0.00285143			0.999854	1.00131	1.00797	1.00117	1.00849	0.995476	0.996328	1.00259	1.00934	0.993194	0.999872	0.99411		1.00081	0.00160445		1.0033	0.993914	0.992005	0.989367	0.994641	1.00013	1.00467	0.996692	0.998047	0.996825	0.998633
2.3618	0.996651	0.993968	0.999249	0.995411	0.984093	1.02388	0.971708	1.00152	0.995544	1.00204	0.999786	0.996587	0.993961	0.986036	0.983029	0.990108		0.994598	0.00279992			1.0009	1.00226	1.00673	1.00337	1.01081	0.995763	0.995053	0.998769	1.00956	0.996614	1.00382	0.994842		1.00154	0.00160251		1.0043	0.99312	0.995616	0.995115	0.999123	0.999497	1.0026	0.987302	0.99541	0.992834	0.996677
2.36983	0.997049	0.99614	1.00156	0.999758	0.977703	1.01842	0.968164	1.00127	0.998484	1.00598	1.00554	0.996525	0.999571	0.988531	0.980475	0.977931		0.994569	0.00321878			1.00034	0.9986	1.00712	1.00037	1.01156	1.00084	0.996486	1.00023	1.01226	0.994802	1.00384	0.9932		1.00164	0.00175342		1.00395	0.992735	0.991461	0.99138	0.99886	1.00304	1.00446	0.990574	0.991756	0.994255	0.998431
2.37787	0.995879	0.996057	1.00088	1.00245	0.979451	1.02257	0.9716	1.0036	0.997718	1.00603	1.00033	1.00246	0.997005	0.987587	0.985227	0.986511		0.99596	0.00298625			0.999877	1.00479	1.00537	0.999991	1.00567	0.996891	0.99234	1.00319	1.01001	0.994995	1.0029	0.990194		1.00052	0.00171661		1.00401	0.995475	0.994892	0.994677	1.00143	0.999811	1.00347	0.98859	0.993187	0.991487	1.00112
2.3859	0.994956	0.994753	0.997993	0.998823	0.981335	1.02565	0.974849	1.00581	0.996169	1.00503	1.00343	0.995458	0.998543	0.988367	0.982306	0.989523		0.995812	0.00294627			1.00102	0.999465	1.00623	1.00102	1.01184	0.998096	0.993631	1.00011	1.00531	0.992352	1.00046	0.989373		0.999909	0.00179513		1.00355	0.992815	0.993673	0.994185	0.999472	1.00131	1.00556	0.989694	0.99342	0.994951	1.00135
2.39393	0.996136	0.993606	1.00073	0.999366	0.980319	1.01961	0.97066	1.00254	0.995554	1.00134	1.00455	0.997864	0.997273	0.987115	0.978553	0.980079		0.994081	0.00303626			0.99978	1.00374	1.00707	1.00476	1.00775	1.00005	0.992692	1.0008	1.00879	0.993713	0.998703	0.994122		1.001	0.00160954		1.00355	0.995454	0.996068	0.995372	0.997474	1.00235	1.00517	0.988413	0.993839	0.996209	0.997917
2.40197	0.998628	0.993977	0.998992	0.999166	0.987199	1.02318	0.976524	1.00461	0.996899	1.00253	1.00032	0.996164	0.99476	0.990082	0.982447	0.982204		0.995479	0.00271388			1.00073	0.998759	1.00896	0.998334	1.00926	1.00097	0.997131	1.00305	1.00911	0.994924	1.00208	0.992188		1.00129	0.00161294		1.00235	0.993709	0.994973	0.995061	0.998576	1.00464	1.00635	0.989641	0.992042	0.99344	0.998439
2.41	0.994629	0.994377	0.998585	1.00048	0.976524	1.01933	0.970512	1.00296	0.994124	1.00363	1.00316	0.995891	1.00032	0.987331	0.980096	0.981811		0.993984	0.00306106			1.00231	0.999631	1.0067	1.00152	1.01036	0.992303	0.996501	1.00184	1.01029	0.992179	1.0012	0.995054		1.00082	0.00178325		1.00171	0.991495	0.995866	0.99247	0.9987	1.00479	1.00827	0.991999	0.996737	0.99311	0.999283
2.41803	0.996471	0.993865	0.998555	0.99889	0.98184	1.01971	0.969449	1.00188	0.993388	1.00248	1.00717	0.997647	0.998323	0.987624	0.989676	0.984835		0.995112	0.00283248			1.00024	1.00467	1.0075	1.00213	1.00835	1.00045	0.996911	1.00326	1.01096	0.990739	1.00184	0.987274		1.00119	0.00199751		0.999688	0.991541	0.993898	0.994586	0.998588	1.00365	1.00667	0.989807	0.992537	0.996354	0.995809
2.42607	0.994812	0.995639	0.999775	0.998285	0.980152	1.02321	0.96873	1.00397	0.995679	1.00076	1.00327	1.00157	0.998746	0.984695	0.984764	0.990116		0.995261	0.00303715			1.00054	1.00174	1.00696	1.00003	1.00744	0.993844	0.994991	1.00453	1.00833	0.995208	1.00289	0.993442		1.00083	0.00157153		1.00012	0.992058	0.993632	0.993926	1.00079	1.00375	1.00604	0.992332	0.994804	0.99196	0.998351
2.4341	0.995106	0.993296	0.996542	1.00053	0.981415	1.02183	0.97201	1.00381	0.998316	1.00409	0.996396	0.999044	0.995693	0.988927	0.986304	0.987018		0.995021	0.0027654			1.00074	1.00036	1.00966	1.00307	1.00598	1.00172	0.995519	1.00258	1.00949	0.992367	1.00286	0.992823		1.00143	0.00163352		1.00293	0.994936	0.994807	0.995889	0.998631	1.00179	1.0047	0.990279	0.993509	0.992021	1.00017
2.44213	0.995646	0.993161	0.994751	1.00058	0.977796	1.01796	0.9663	1.00218	0.996575	1.00409	1.00186	0.994475	0.995342	0.98632	0.991002	0.990844		0.994305	0.00286273			1.00378	1.00106	1.01015	1.0007	1.00894	0.997734	0.993803	1.00333	1.01071	0.993373	1.00292	0.994457		1.00175	0.00177278		1.00008	0.992418	0.990189	0.992793	0.993309	1.00317	1.00427	0.989717	0.999497	0.996009	0.999165
2.45017	0.996393	0.99582	0.998134	1.00124	0.979051	1.01853	0.969585	1.00441	0.997005	1.00525	1.00663	0.997151	0.99461	0.986557	0.987498	0.988529		0.9954	0.00289383			1.00311	1.00432	1.01146	1.00039	1.00618	1.00212	0.995856	1.00083	1.0096	0.994193	0.995919	0.989375		1.00111	0.00186873		1.00211	0.991688	0.9913	0.996754	0.99834	1.00036	1.00449	0.993769	0.997054	0.996019	1.00056
2.4582	0.99687	0.996915	0.996171	0.996953	0.985576	1.02255	0.970722	1.00213	0.997061	1.00114	1.00506	0.996124	0.997861	0.986273	0.986338	0.986121		0.995241	0.00280029			0.999351	0.997884	1.01098	1.00475	1.00869	1.00344	0.995568	0.998739	1.00996	0.993905	1.00131	0.992507		1.00142	0.00179735		0.99896	0.993371	0.992128	0.99197	0.995718	1.00355	1.00431	0.991627	0.998596	0.996094	0.99701
2.46623	0.996156	0.99807	0.998973	1.00232	0.980765	1.01994	0.968506	1.00307	0.993852	1.00065	1.00085	0.996798	0.995698	0.986575	0.988745	0.982904		0.994616	0.00288447			1.0031	1.00353	1.00806	1.00269	1.00544	0.995667	1.00041	0.997401	1.01141	0.993011	0.998359	0.991041		1.00084	0.00174749		1.00052	0.993086	0.993816	0.990936	0.997132	1.00085	1.00439	0.990488	0.994179	0.995082	0.996527
2.47427	0.990031	0.992657	0.997338	0.999177	0.981679	1.01546	0.969743	1.00326	0.99547	1.00313	1.00515	0.997235	0.995902	0.987761	0.988043	0.985595		0.994227	0.00266945			1.00231	0.999535	1.00712	1.00304	1.01175	1.01003	0.995111	1.00151	1.01035	0.99291	0.997956	0.98977		1.00178	0.00205645		1.00029	0.992234	0.991464	0.991987	0.994703	1.00118	1.004	0.992364	0.998244	0.995829	0.998651
2.4823	0.998191	0.996876	1.0026	1.00044	0.986233	1.01723	0.970241	1.0038	0.993041	1.00122	1.0001	0.99623	0.99788	0.987348	0.981713	0.986235		0.994962	0.00270257			1.00052	1.00397	1.00975	1.00174	1.0046	0.994	0.997398	0.997523	1.01099	0.991803	0.998453	0.991229		1.00016	0.00184842		1.00158	0.9946	0.99501	0.995036	0.996092	1.00235	1.00449	0.99612	0.999359	0.99513	0.99977
2.49033	0.991375	0.991706	0.994036	0.994889	0.988637	1.02103	0.974928	1.00539	0.99613	1.00247	1.00209	0.995427	0.996988	0.986275	0.984205	0.983479		0.994315	0.00264803			1.0012	0.998813	1.01216	1.00233	1.00591	0.998464	0.99544	0.996285	1.00817	0.992342	0.998149	0.989305		0.999882	0.00188926		1.00221	0.992754	0.99166	0.991948	0.995153	1.0011	1.00269	0.994059	0.996816	0.994512	0.996851
2.49837	0.990226	0.995081	0.997	0.994628	0.981641	1.02004	0.968052	1.00364	0.994222	0.99711	1.0023	0.997578	0.998595	0.985808	0.991607	0.988773		0.994144	0.0027645			1.00219	1.00406	1.01078	0.999788	1.00673	0.99528	0.994279	0.996987	1.0096	0.991862	0.996882	0.989229		0.999806	0.00200485		1.00114	0.994321	0.994454	0.991355	0.997708	0.999828	1.00596	0.993529	0.997237	0.99131	0.998366
2.5064	0.989647	0.992277	0.99363	0.996526	0.980844	1.0199	0.970758	1.00336	0.991625	1.00098	1.00377	0.999932	0.997924	0.987316	0.984919	0.979379		0.993299	0.00291099			1.00259	1.00503	1.01255	1.00063	1.00489	1.00247	0.999304	1.00325	1.00863	0.993279	0.997106	0.988565		1.00152	0.00187074		1.00388	0.995156	0.994149	0.995523	0.998251	1.00406	1.00589	0.993638	0.994932	0.995165	0.999356
2.51443	0.991498	0.994969	0.996101	0.9995	0.986844	1.01849	0.973789	1.00282	0.993879	1.00216	0.998715	0.99751	0.997503	0.986315	0.995916	0.98668		0.995168	0.00240416			1.00185	1.00926	1.01128	1.00128	1.0045	0.998279	1.00287	1.00197	1.01093	0.993518	0.997362	0.990387		1.00196	0.00188351		1.00407	0.992735	0.994918	0.99258	0.994136	1.00157	1.00436	0.99273	0.996002	0.995561	0.996256
2.52247	0.989883	0.992382	0.9969	0.996476	0.983479	1.01921	0.971483	1.00329	0.991456	1.00196	1.00042	0.997572	0.99526	0.986214	0.990877	0.984064		0.993808	0.00263606			1.0031	1.0047	1.0098	1.00297	1.00718	1.00202	0.996364	1.00501	1.00948	0.993676	0.996667	0.98469		1.0013	0.00210597		1.00149	0.993024	0.993985	0.994988	0.997007	1.0056	1.00298	0.996911	0.996852	0.997375	0.995292
2.5305	0.990887	0.992668	0.997263	0.99688	0.98557	1.01727	0.972911	1.00295	0.993821	0.998335	1.00201	0.999599	0.999376	0.984319	0.989142	0.985991		0.994312	0.00249246			1.00532	1.00037	1.00996	1.00057	1.0031	0.997343	0.998603	1.00022	1.01073	0.994478	0.998292	0.99035		1.00078	0.00169888		1.00039	0.995271	0.992623	0.994702	0.998617	1.00255	1.00554	0.989919	0.999961	0.995245	0.993638
2.53853	0.989738	0.991544	0.992432	0.993632	0.983914	1.02014	0.972816	1.0048	0.992613	1.0013	1.0013	1.00117	0.999236	0.987431	0.986967	0.989024		0.994253	0.00264629			1.00656	1.00389	1.0117	1.00086	1.00583	0.999841	0.994111	1.00198	1.00886	0.994193	0.997045	0.991945		1.0014	0.00180639		1.00125	0.993803	0.994686	0.995141	0.998697	0.999267	1.00784	0.994496	0.999616	0.995825	0.997784
2.54657	0.989855	0.989464	0.99663	0.993536	0.98397	1.01196	0.971871	1.00299	0.994374	1.00132	0.999705	0.995293	0.995256	0.984836	0.98255	0.981799		0.992213	0.00245036			1.00772	1.0088	1.01069	0.999815	1.00361	0.99847	1.00181	1.00019	1.00826	0.994962	0.997135	0.989602		1.00175	0.00183167		1.00567	0.995159	0.996635	0.995059	0.998344	1.00344	1.0044	0.995272	0.995992	0.994659	0.994753
2.5546	0.990543	0.991472	1.00076	0.993565	0.982974	1.01242	0.974768	1.00362	0.99041	0.997662	0.998939	0.99949	0.997724	0.984658	0.987637	0.98522		0.993242	0.00230758			1.00425	1.00355	1.01487	1.0013	1.00506	0.998105	0.999741	1.00458	1.01162	0.992375	0.995516	0.987932		1.00158	0.00218982		1.0022	0.991619	0.989976	0.992903	0.995952	1.00626	1.00478	0.995499	0.997463	0.993714	0.994287
2.56263	0.989252	0.990532	0.996862	0.995748	0.983083	1.0201	0.977955	1.00248	0.992095	0.999853	1.00262	0.999286	1.00123	0.988602	0.983005	0.980785		0.993968	0.00265553			1.00774	1.01089	1.01108	0.998497	1.00448	1.0017	0.999168	0.999192	1.00886	0.992784	0.998255	0.990015		1.00189	0.00198162		1.00639	0.991364	0.993239	0.993167	0.997153	1.00415	1.00739	0.996583	0.996813	0.995623	0.996954
2.57067	0.987819	0.989331	0.993643	0.994927	0.984478	1.02018	0.97917	1.00378	0.989301	0.9993	0.997152	0.99731	0.996995	0.985211	0.984083	0.982448		0.992821	0.00251632			1.00704	1.01063	1.01136	0.999815	1.0054	0.99948	0.994669	1.0014	1.0079	0.991351	0.997245	0.988117		1.0012	0.00216769		1.00485	0.995963	0.995611	0.995257	0.997645	1.00454	1.00793	0.990303	0.995901	0.993411	0.994343
2.5787	0.987399	0.990448	0.998949	0.997367	0.986738	1.01549	0.975773	1.00394	0.987929	0.997991	0.999258	0.997604	0.994889	0.987232	0.982476	0.991328		0.993425	0.00233812			1.00575	1.00942	1.01267	1.00011	1.0004	1.00148	0.995714	1.00107	1.00659	0.990462	0.993461	0.989177		1.00053	0.0021233		1.00268	0.990424	0.992653	0.989323	0.995998	1.00487	1.00441	0.990684	0.996918	0.9912	0.995341
2.58673	0.987309	0.989335	0.994138	0.994843	0.990326	1.0196	0.980601	1.00438	0.986879	0.996967	0.998792	0.998349	0.996328	0.987391	0.977431	0.983788		0.992903	0.00252751			1.00508	1.00606	1.01287	1.00061	1.00154	0.998542	0.997295	1.00243	1.00738	0.990396	0.993511	0.987067		1.00023	0.00213482		1.00286	0.994746	0.988664	0.990658	0.999667	1.00672	1.00728	0.992102	0.996819	0.991045	0.996277
2.59477	0.987029	0.990648	0.995012	0.994851	0.990133	1.01072	0.976819	1.00427	0.988368	0.994032	0.99469	0.993592	0.993709	0.986099	0.983445	0.987471		0.991931	0.00197601			1.00364	1.00793	1.01476	1.00025	1.00549	1.00171	1.00374	0.99794	1.00748	0.991016	0.99375	0.986195		1.00116	0.00229576		1.00527	0.993337	0.991508	0.990851	0.995721	1.00614	1.0034	0.992662	0.992518	0.994525	0.992853
2.6028	0.98657	0.992599	0.997006	0.996458	0.985772	1.01517	0.976636	1.00358	0.988881	0.998935	0.999295	0.995264	0.996224	0.987827	0.985231	0.994228		0.99373	0.00221798			1.00386	1.00736	1.01337	0.999163	1.00339	0.996963	0.99531	0.999985	1.00936	0.99061	0.993209	0.986588		0.999931	0.00229122		1.00346	0.990315	0.989311	0.990745	0.993727	1.00802	1.00314	0.994999	0.997593	0.99223	0.994264
2.61083	0.987638	0.990046	0.996885	0.994681	0.988437	1.02211	0.977728	1.00462	0.987453	0.995011	0.995601	0.994281	0.996417	0.9894	0.983793	0.987214		0.993207	0.00248071			1.00582	1.00944	1.01315	1.00001	1.00267	0.998641	0.996315	1.00126	1.00648	0.992119	0.992941	0.987522		1.00053	0.00217827		1.00551	0.991144	0.993668	0.992322	0.994834	1.00316	1.00253	0.991044	0.998286	0.995365	0.998122
2.61887	0.986605	0.990382	0.998028	0.995094	0.97889	1.01913	0.970098	1.00229	0.987689	0.997397	0.996123	0.998091	0.996363	0.988731	0.982273	0.991217		0.9924	0.00273498			1.00465	1.0092	1.01456	1.0011	1.00605	0.997721	0.994085	0.997724	1.0087	0.987634	0.993772	0.986954		1.00018	0.00252033		1.00434	0.989537	0.991752	0.991646	0.994331	1.00326	1.00326	0.994462	0.996302	0.993259	0.995224
2.6269	0.984846	0.990976	0.993662	0.992708	0.982441	1.01254	0.967732	1.00328	0.98804	0.994736	0.999874	0.996156	0.99477	0.989189	0.977246	0.986907		0.990944	0.00260522			1.00418	1.0109	1.015	1.00236	1.00784	0.999775	0.998606	1.0035	1.00764	0.990873	0.995169	0.988033		1.00199	0.00230818		1.00191	0.992511	0.991836	0.992699	0.994568	1.00875	1.00718	0.992695	0.996228	0.992004	0.993675
2.63493	0.986268	0.987925	0.996406	0.994617	0.987571	1.02154	0.97353	1.00536	0.99018	0.998195	0.996336	0.993779	0.993949	0.985836	0.981768	0.995654		0.993057	0.00265611			1.00467	1.0085	1.01497	1.00064	1.0014	0.995985	0.997947	0.997271	1.00715	0.990394	0.991795	0.988106		0.999903	0.00230348		1.00141	0.988964	0.989464	0.992036	0.996714	1.00672	1.0053	0.990876	0.989474	0.989447	0.992276
2.64297	0.987621	0.989308	0.995318	0.991576	0.985813	1.02582	0.974324	1.0046	0.986691	0.996901	1.00157	0.999466	0.996666	0.984791	0.982453	0.990958		0.993367	0.00290552			1.00439	1.0147	1.01605	1.00037	1.00159	0.999596	0.995545	0.998424	1.00911	0.990681	0.993594	0.984655		1.00073	0.00269432		1.00017	0.990747	0.987704	0.985712	0.993604	1.00423	1.00375	0.991628	0.997071	0.993795	0.994857
2.651	0.987457	0.987221	0.998648	0.991071	0.982579	1.01829	0.972282	1.00028	0.987529	0.995724	0.994648	0.993104	0.994479	0.990199	0.986707	0.996966		0.992324	0.00243946			1.0078	1.00674	1.01646	0.998878	1.00466	0.993464	0.996671	1.00227	1.00604	0.988858	0.99271	0.98815		1.00022	0.00248114		1.00361	0.992127	0.991018	0.992165	0.997906	1.00655	0.998808	0.987399	0.992848	0.989223	0.992919
2.65903	0.986461	0.988929	0.999073	0.993433	0.990704	1.02424	0.979096	1.00524	0.98707	0.994896	0.99983	0.98799	0.993214	0.986361	0.982265	0.989825		0.993039	0.00266181			1.00504	1.01759	1.01613	0.999221	1.00456	0.998686	0.999634	1.0042	1.00645	0.991685	0.994466	0.992438		1.00251	0.00239785		1.00075	0.989426	0.990086	0.987127	0.993756	1.00835	1.00703	0.990039	0.995875	0.991842	0.994889
2.66707	0.986589	0.990908	0.997813	0.993735	0.985944	1.01571	0.972694	1.00342	0.990122	0.996372	0.993586	0.995539	0.995487	0.987918	0.979166	0.991396		0.992275	0.00241482			1.00718	1.01035	1.0179	1.00011	1.0034	0.996569	0.999366	1.00386	1.00794	0.992711	0.994169	0.988757		1.00186	0.00238795		0.998638	0.992108	0.990824	0.986767	0.997864	1.00874	1.00344	0.992656	0.992656	0.988442	0.994299
2.6751	0.985813	0.986441	0.992757	0.990135	0.983697	1.01503	0.96938	1.00187	0.98763	0.998764	0.990502	0.991149	0.992486	0.987048	0.981982	0.995612		0.990643	0.00246493			1.00669	1.01518	1.01645	1.00006	1.00435	0.994556	0.997409	0.997147	1.00789	0.991091	0.993416	0.990984		1.00127	0.00254676		1.00394	0.989027	0.991434	0.989805	0.9959	1.0081	1.00467	0.991256	0.993851	0.987742	0.991739
2.68313	0.985355	0.986551	0.994758	0.98962	0.990749	1.01876	0.975917	1.00448	0.985628	0.998335	0.994411	0.99087	0.99267	0.985529	0.981541	0.986924		0.991381	0.00248172			1.00629	1.01851	1.01409	0.996953	1.00369	0.996757	0.996576	0.999993	1.01003	0.993284	0.993499	0.991098		1.00173	0.00254845		1.00065	0.992037	0.989232	0.990388	0.995907	1.00725	1.00392	0.992807	0.993153	0.991214	0.991283
2.69117	0.983913	0.988024	0.996114	0.991647	0.991631	1.01987	0.978626	1.00554	0.990534	0.996321	0.999752	0.995831	0.999556	0.985546	0.97812	0.985887		0.992932	0.0026203			1.00732	1.01285	1.01476	0.997264	1.00536	0.994389	1.00095	0.996529	1.00607	0.993499	0.993906	0.989855		1.00106	0.0023397		0.99825	0.991376	0.990491	0.98778	0.994574	1.00556	1.00407	0.988705	0.991592	0.992361	0.992695
2.6992	0.987424	0.988101	0.994365	0.998917	0.984316	1.01619	0.971865	1.00189	0.988362	0.99748	0.994633	0.995761	0.99509	0.987954	0.980552	0.988094		0.991937	0.00247784			1.00701	1.01124	1.0149	0.996995	1.00727	0.994894	1.00023	0.999572	1.00656	0.993152	0.993163	0.989784		1.00123	0.00231666		1.00306	0.992746	0.99227	0.989542	0.997764	1.00586	1.00003	0.988737	0.991784	0.988358	0.990871
2.70723	0.983113	0.990015	0.992383	0.990135	0.984682	1.0164	0.976619	1.00411	0.985267	0.995293	0.993385	0.994632	0.994187	0.987328	0.982636	0.991808		0.991375	0.00232002			1.0081	1.01535	1.01653	0.997447	1.00973	0.997713	0.997168	0.99925	1.00699	0.992868	0.987865	0.989351		1.00153	0.0027818		0.998616	0.991406	0.989952	0.986099	0.996251	1.00932	1.00294	0.991972	0.988751	0.988627	0.990115
2.71527	0.989649	0.990293	0.994649	0.997749	0.994465	1.01776	0.981139	1.00476	0.984749	0.995269	0.997774	0.992359	0.995512	0.989526	0.980025	0.990404		0.993504	0.00225791			1.00793	1.01677	1.01635	0.999419	1.00041	0.993885	1.00049	1.00163	1.00598	0.992984	0.991126	0.989667		1.00139	0.00261077		1.00267	0.986033	0.989859	0.988296	0.992396	1.00635	1.00651	0.989171	0.990685	0.988306	0.992054
2.7233	0.987156	0.988013	0.993097	0.991043	0.990464	1.01701	0.978062	1.00299	0.983114	0.993058	0.99336	0.993406	0.992317	0.987317	0.978499	0.989425		0.991146	0.00229821			1.01021	1.01823	1.01667	0.999988	1.00455	0.99385	1.00149	1.00039	1.00598	0.994876	0.993378	0.989999		1.00247	0.0026231		1.00388	0.992298	0.992295	0.988453	0.994572	1.00963	1.00419	0.98957	0.991905	0.987517	0.99002
2.73133	0.985777	0.986416	0.99156	0.993206	0.987076	1.01398	0.972485	1.00102	0.986686	0.993996	0.995104	0.994477	0.993617	0.987725	0.974097	0.986068		0.990206	0.00242764			1.00762	1.0209	1.01678	0.997402	1.00456	0.990448	1.00048	0.999912	1.00429	0.990833	0.991367	0.988891		1.00112	0.00299058		1.00175	0.988124	0.98846	0.986213	0.994199	1.01103	1.00426	0.99146	0.993101	0.98675	0.989904
2.73937	0.984033	0.987058	0.992826	0.986729	0.986232	1.01153	0.973134	1.0017	0.982782	0.996325	0.99844	0.991968	0.994919	0.993294	0.981177	0.999914		0.991379	0.00233641			1.01079	1.01399	1.01653	0.998089	1.00524	0.999778	1.001	1.00303	1.00632	0.994058	0.993191	0.990262		1.00269	0.00239376		1.00187	0.987277	0.988799	0.986657	0.992596	1.00733	1.00515	0.986407	0.988479	0.982081	0.988927
2.7474	0.985927	0.989403	0.994965	0.993593	0.993021	1.0197	0.978984	1.00372	0.98451	0.995297	0.996562	0.991782	0.994677	0.984787	0.980309	0.994561		0.992613	0.00242773			1.00713	1.01635	1.01695	0.997382	1.00482	0.990725	0.999064	1.00286	1.00504	0.992695	0.990746	0.986194		1.00083	0.00285674		1.00441	0.989199	0.989029	0.988731	0.991848	1.00502	1.00416	0.988489	0.993074	0.987089	0.989086
2.75543	0.982679	0.985048	0.99285	0.992015	0.98668	1.01585	0.973967	1.00081	0.984941	0.993432	0.993872	0.993046	0.995467	0.98445	0.982643	0.994236		0.990749	0.00235292			1.00776	1.01667	1.01776	0.994595	1.0033	0.991738	1.00012	1.00113	1.0072	0.995298	0.990453	0.989238		1.00127	0.00278599		1.00113	0.985016	0.989269	0.988335	0.989589	1.00501	1.00095	0.989472	0.98998	0.98631	0.989183
2.76347	0.985041	0.986727	0.987599	0.990001	0.982032	1.0061	0.967786	0.999265	0.984124	0.995367	0.992373	0.988268	0.989432	0.987754	0.981629	0.995851		0.988709	0.00213902			1.00993	1.01626	1.01685	0.9987	1.00208	0.994391	0.994584	0.999317	1.01171	0.997211	0.992427	0.989393		1.00191	0.00273259		1.00571	0.990076	0.988033	0.986635	0.991186	1.00651	1.00336	0.992751	0.990512	0.987716	0.989378
2.7715	0.98451	0.988542	0.990911	0.990332	0.989565	1.01039	0.974927	1.00213	0.987018	0.997534	0.994425	0.988154	0.99447	0.990202	0.977936	0.997941		0.991187	0.00215863			1.01115	1.0167	1.02086	0.999694	1.00436	0.993715	1.00373	1.00261	1.00776	0.99772	0.992642	0.987183		1.00318	0.00286091		0.997096	0.984567	0.986219	0.986794	0.991303	1.00706	1.00208	0.985385	0.994792	0.985343	0.994065
2.77953	0.984412	0.987944	0.990991	0.992308	0.988132	1.01232	0.975331	0.999834	0.986519	0.995465	0.996961	0.99208	0.997253	0.99048	0.978102	0.997558		0.991605	0.00219867			1.0069	1.0159	1.02067	0.99583	1.00534	0.995842	1.00587	1.0005	1.00843	0.996464	0.991765	0.988737		1.00269	0.00277599		1.00436	0.984712	0.993877	0.98757	0.993628	1.00713	1.00554	0.98797	0.991084	0.98577	0.98817
2.78757	0.985646	0.989475	0.992895	0.997716	0.990634	1.011	0.98236	1.00178	0.984903	0.995624	0.993591	0.989861	0.992791	0.987846	0.977636	0.995208		0.991811	0.00197527			1.00679	1.01339	1.01871	0.994661	1.00611	0.996932	1.00252	0.998644	1.00995	0.998121	0.990313	0.988541		1.00206	0.00266235		1.00482	0.987756	0.991271	0.989811	0.991111	1.00796	1.00456	0.992637	0.990112	0.982632	0.991485
2.7956	0.985205	0.987348	0.990388	0.998191	0.988545	1.00751	0.976184	1.00096	0.985533	0.998784	0.994374	0.989063	0.99331	0.991383	0.980757	1.00265		0.991886	0.00207695			1.00939	1.01842	1.02112	0.997805	1.00217	0.992691	1.00696	1.00088	1.01099	0.997505	0.995443	0.989289		1.00355	0.00288195		1.00264	0.987597	0.989762	0.988986	0.995727	1.00529	1.0036	0.992048	0.992049	0.987955	0.991898
2.80363	0.985178	0.982875	0.986909	0.988629	0.98848	1.00856	0.976266	1.00025	0.984979	0.996932	0.996714	0.991776	0.997142	0.998285	0.982061	1.00615		0.99195	0.00226418			1.00788	1.01835	1.0165	0.995627	1.00514	0.992856	1.00362	0.998879	1.01038	1.00092	0.992097	0.986298		1.00238	0.00285076		1.00229	0.984312	0.986766	0.988951	0.992751	1.0071	1.00501	0.993258	0.993536	0.98878	0.992986
2.81167	0.987894	0.988005	0.995302	0.998951	0.987447	1.00458	0.97563	0.998481	0.989963	0.997489	0.994328	0.98593	0.992296	0.990404	0.973534	0.996642		0.991055	0.00204977			1.0112	1.01819	1.02292	0.996348	1.00639	0.994615	1.00369	1.00308	1.01036	1.0004	0.990827	0.989198		1.00394	0.00302797		1.00437	0.987825	0.990068	0.98907	0.996103	1.01069	1.00287	0.993137	0.993547	0.989927	0.994368
2.8197	0.986186	0.988945	0.991828	0.997989	0.990292	1.00663	0.977139	1.0014	0.9884	0.998235	0.995354	0.987495	0.991839	0.986542	0.97307	0.992323		0.990854	0.00209737			1.00731	1.02242	1.01894	0.997025	1.00555	0.994351	1.00017	1.00449	1.00809	0.998527	0.994668	0.990782		1.00353	0.00280457		1.00022	0.981769	0.987803	0.990317	0.993116	1.0061	1.0022	0.992823	0.992536	0.987239	0.987905
2.82773	0.987184	0.986961	0.989905	0.992744	0.995869	1.00519	0.978489	1.0038	0.985052	0.997136	0.995357	0.992955	0.994039	0.985431	0.978675	0.995351		0.991509	0.00191865			1.01114	1.02249	1.02349	0.992942	1.00421	0.996387	1.00579	1.00444	1.0137	1.00331	0.99659	0.989883		1.00536	0.00311738		1.00492	0.985331	0.989622	0.986389	0.993313	1.00619	1.00286	0.992712	0.992859	0.98877	0.989176
2.83577	0.986894	0.98941	0.991234	0.995975	0.990319	1.00372	0.976308	0.999074	0.988209	0.998694	0.99588	0.989662	0.997754	0.988101	0.979025	0.997562		0.991739	0.00183928			1.01183	1.0248	1.0194	0.995458	1.00992	0.998626	1.00209	1.00698	1.00934	1.00101	0.992752	0.992173		1.00537	0.00296688		0.999156	0.98527	0.991508	0.987828	0.990829	1.00464	1.00239	0.994567	0.994098	0.99468	0.989968
2.8438	0.984039	0.989799	0.992001	0.993293	0.991098	1.00625	0.978595	1.0007	0.984033	0.994708	0.998703	0.984864	0.995283	0.984576	0.972046	0.996918		0.990432	0.00218395			1.0111	1.0181	1.01913	0.995524	1.00547	0.999025	1.00161	1.0004	1.00856	1.00142	0.99744	0.990851		1.00405	0.00252133		1.00023	0.985532	0.987522	0.986622	0.99558	1.00699	1.0005	0.992313	0.99377	0.988479	0.993565
2.85183	0.986306	0.988834	0.991255	0.995201	0.985382	1.00171	0.972555	0.999053	0.985967	0.997442	0.99549	0.98935	0.997448	0.986146	0.97741	0.995848		0.990337	0.00199141			1.0102	1.01779	1.02393	0.993048	1.00254	0.992253	1.00307	1.00734	1.01198	1.0035	0.995842	0.993468		1.00458	0.00293259		1.00152	0.985873	0.990895	0.987172	0.993163	1.00275	1.00044	0.99093	0.991469	0.984401	0.989865
2.85987	0.98366	0.985815	0.987046	0.992891	0.993573	1.00677	0.975593	1.00029	0.989399	0.999905	0.994971	0.987868	0.994604	0.985145	0.981368	1.00539		0.991517	0.0021689			1.01393	1.02794	1.02224	0.994923	1.00549	0.99818	1.00533	1.00003	1.00863	1.00541	0.995507	0.993918		1.00596	0.00312815		1.00229	0.985196	0.990053	0.988996	0.994373	1.00711	1.0017	0.992831	0.99322	0.990223	0.992346
2.8679	0.986419	0.988295	0.988216	0.995891	0.988409	1.00045	0.979085	1.00046	0.987778	0.998999	0.993541	0.989451	0.998646	0.986562	0.97978	1.00146		0.991465	0.00180361			1.01131	1.02224	1.02197	0.991852	1.00484	0.998048	1.00154	1.00417	1.00945	1.0042	0.99461	0.994681		1.00491	0.00287837		1.00255	0.980865	0.98955	0.985845	0.993655	1.00205	1.00059	0.993834	0.994572	0.989532	0.99592
2.87593	0.983949	0.989971	0.988815	0.994201	0.987279	0.998317	0.974974	0.998868	0.987794	0.997887	0.99485	0.991494	0.997181	0.986339	0.977156	0.991886		0.99006	0.00178292			1.01262	1.02808	1.02278	0.991607	1.00109	0.996288	1.00249	1.00591	1.00984	1.00288	0.992942	0.992603		1.00493	0.00338414		1.00032	0.986488	0.988914	0.988102	0.992654	1.00626	1.00203	0.994729	0.992943	0.987865	0.994094
2.88397	0.988679	0.987167	0.987605	0.993465	0.995955	1.00512	0.980692	1.00125	0.987165	0.999578	0.995938	0.988025	0.997177	0.985167	0.973638	0.995885		0.991407	0.00203028			1.01228	1.02456	1.02332	0.994079	1.00262	0.998921	1.00146	1.00289	1.0147	1.00498	0.997	0.998043		1.00624	0.00293632		1.00443	0.987083	0.990207	0.988139	0.993554	1.00761	1.00073	0.992998	0.989111	0.987579	0.992437
2.892	0.986137	0.987581	0.985911	0.991915	0.990728	1.00506	0.975554	0.999793	0.989932	1.00203	0.997604	0.990025	0.998821	0.987965	0.976092	0.999605		0.991547	0.00214567			1.0173	1.02432	1.0254	0.992582	1.0026	0.99459	1.00886	1.00059	1.00967	1.00805	0.996502	0.997893		1.00653	0.00322067		1.00253	0.984234	0.990441	0.98715	0.993356	1.00984	1.00283	0.992847	0.991244	0.988171	0.990336
2.90003	0.986588	0.988908	0.989772	0.993811	0.993867	1.00265	0.980521	0.999286	0.98878	0.998296	0.992346	0.989831	0.996309	0.985307	0.98204	0.999001		0.991707	0.00159942			1.01685	1.02088	1.02132	0.991374	1.00075	0.997601	0.997681	1.00644	1.01053	1.00471	0.996848	0.993836		1.0049	0.00300851		1.00164	0.984927	0.989221	0.986621	0.994712	1.00715	1.00249	0.989896	0.993677	0.98851	0.994787
2.90807	0.983311	0.989826	0.986577	0.991322	0.993008	1.00264	0.981622	0.999956	0.986635	0.997425	1.00006	0.994673	1.00558	0.985438	0.97598	0.997277		0.991958	0.00207906			1.01463	1.02428	1.02491	0.99045	1.00438	0.998483	1.00334	1.00956	1.01046	1.00517	0.995256	0.997973		1.00657	0.0031181		1.00268	0.982825	0.989426	0.987471	0.993979	1.00604	0.998737	0.993457	0.99136	0.989588	0.995098
2.9161	0.987946	0.990727	0.99015	0.99624	0.994547	1.00084	0.979046	0.999896	0.986476	0.999207	0.998662	0.985749	1.00086	0.981439	0.978393	0.999753		0.991871	0.00199497			1.01692	1.02202	1.02513	0.992754	1.00354	0.996418	1.00185	1.00327	1.0088	1.0052	0.996966	0.997796		1.00589	0.00301106		1.00443	0.992495	0.992148	0.990309	0.998062	1.00899	1.00192	0.988447	0.992471	0.990282	0.991429
2.92413	0.985496	0.987493	0.987215	0.991207	0.994589	0.997187	0.978591	0.999622	0.9834	0.997696	0.998854	0.990216	1.00276	0.983034	0.975457	1.0028		0.990976	0.00212498			1.0166	1.02686	1.02549	0.994098	1.00445	0.997854	1.00703	1.00432	1.00989	1.01035	0.995998	1.00111		1.00784	0.00308848		1.00281	0.986031	0.990274	0.989763	0.994529	1.0053	0.998758	0.99427	0.992902	0.99031	0.996094
2.93217	0.985483	0.988989	0.992494	0.995853	0.990616	0.999027	0.97954	0.997492	0.989673	0.998154	0.994831	0.994191	0.998443	0.98142	0.978058	1.00485		0.99182	0.00190596			1.01875	1.03096	1.02555	0.994245	1.00463	0.999136	1.0069	1.0035	1.01205	1.00888	0.995522	1.00325		1.00861	0.00330551		1.00568	0.986702	0.995134	0.989342	0.993628	1.00643	1.00128	0.99382	0.994306	0.98899	0.995269
2.9402	0.989362	0.989233	0.994253	0.996425	0.991198	0.997158	0.976332	0.99808	0.989246	0.997219	0.999109	0.990737	1.00051	0.98284	0.978744	1.00374		0.992137	0.00194251			1.01445	1.0251	1.02915	0.991138	1.0019	0.998521	1.00261	1.00821	1.01113	1.00906	0.998764	1.00015		1.00752	0.00322935		1.00705	0.98886	0.989179	0.987424	0.996813	1.00529	0.998335	0.993557	0.994431	0.986988	0.994144
2.94823	0.988166	0.989199	0.989824	0.993572	0.995504	0.998429	0.981622	0.998443	0.988186	1.00008	0.999062	0.987603	1.00087	0.985388	0.981997	0.998642		0.992287	0.00164174			1.01441	1.03297	1.02633	0.991735	1.0063	0.99971	1.00395	1.00709	1.01365	1.01187	0.999107	1.00462		1.00931	0.00333814		1.0029	0.989173	0.99196	0.990345	0.995855	1.00635	1.00098	0.996779	0.995258	0.987628	0.995636
2.95627	0.988686	0.989676	0.991138	0.996658	0.99099	0.996999	0.980022	0.998457	0.992305	1.00099	1.00262	0.990558	1.00384	0.982926	0.978009	0.996828		0.992544	0.00191766			1.01745	1.0294	1.02465	0.992161	1.00742	0.998926	1.00352	1.0059	1.01178	1.01303	1.00143	1.00195		1.00897	0.00312704		0.998664	0.985248	0.990145	0.986421	0.992109	1.0067	1.00065	0.99316	0.995587	0.989475	0.997611
2.9643	0.991846	0.991146	0.991784	1.00135	0.993224	0.998341	0.984071	0.999505	0.991184	1.00307	1.00078	0.988723	1.00154	0.98306	0.982371	1.00561		0.994226	0.00185958			1.01694	1.02908	1.02621	0.992466	1.00932	1.00036	1.00296	1.00558	1.00987	1.01415	0.996857	1.0075		1.00928	0.00317981		1.00505	0.988967	0.992731	0.989316	0.996551	1.00927	0.996672	0.99342	0.992013	0.989672	0.99585
2.97233	0.987984	0.991761	0.990812	0.996538	0.997166	0.99398	0.980148	0.998857	0.989055	1.00208	0.999559	0.991365	1.00042	0.981946	0.982835	1.00677		0.993205	0.00190943			1.02113	1.02909	1.02843	0.996178	1.00598	1.00172	1.00516	1.0043	1.01112	1.01492	1.00026	1.00543		1.01031	0.0031376		0.999543	0.991568	0.992036	0.990823	0.994159	1.0054	0.999832	0.99419	0.992513	0.991625	0.999272
2.98037	0.991449	0.995074	0.992701	0.998266	0.997849	0.997951	0.98404	1.00059	0.993428	1.00103	1.00084	0.993326	0.99765	0.980948	0.979549	0.998475		0.993948	0.00172007			1.01858	1.03355	1.02877	0.993603	1.00388	1.00029	1.00576	1.00909	1.0103	1.01322	0.9988	1.00436		1.01002	0.00344623		1.00291	0.989242	0.991038	0.988168	0.997157	1.00666	0.998076	0.996723	0.992966	0.990789	0.997854
2.9884	0.989417	0.990827	0.989596	0.996254	0.999306	1.00336	0.987647	1.00013	0.989168	1.00246	1.00347	0.99065	0.999084	0.980948	0.983688	1.00898		0.994687	0.00200481			1.01968	1.02634	1.02787	0.991643	1.00971	1.00247	1.00291	1.00899	1.00877	1.01302	0.99638	1.00695		1.00956	0.00317216		1.00141	0.989223	0.990526	0.986967	0.994598	1.00475	0.998094	0.996394	0.992957	0.99589	0.999042
2.99643	0.990092	0.993069	0.991556	0.998023	0.991168	0.998589	0.981622	0.996962	0.989401	1.00304	1.00158	0.990307	1.00233	0.980837	0.980132	1.00309		0.993238	0.0019491			1.0218	1.03354	1.02907	0.991871	1.00415	0.997252	1.00474	1.00415	1.00882	1.01507	1.00043	1.007		1.00982	0.0036634		1.00449	0.989835	0.989895	0.987897	0.995647	1.00506	0.996354	0.998919	1.00005	0.990797	1.00217
3.00447	0.99385	0.993272	0.989349	1.00095	0.992725	0.999188	0.983078	0.99795	0.990069	1.00033	1.00201	0.989839	1.00037	0.982058	0.983415	1.0043		0.993922	0.00179364			1.01871	1.02692	1.02999	0.991322	1.00793	0.996331	1.00908	1.00376	1.01362	1.01849	1.00022	1.01033		1.01056	0.00339185		1.0066	0.994312	0.993908	0.992631	0.993241	1.00387	0.995419	0.996006	0.99563	0.988533	0.997243
3.0125	0.990206	0.994794	0.989518	0.994849	0.99072	0.999028	0.980119	0.997335	0.990959	1.00243	1.00464	0.989304	1.00086	0.981088	0.984837	1.00497		0.993479	0.00194184			1.01909	1.03012	1.02955	0.993814	1.0064	1.00498	1.0098	1.005	1.01022	1.01841	0.997801	1.01446		1.01164	0.00325912		1.00227	0.989053	0.991773	0.989397	0.995212	1.00739	0.997714	0.993168	0.994337	0.993859	0.995721
3.02053	0.992723	0.995153	0.991209	1.00175	0.994599	1.00047	0.982651	0.99775	0.990114	1.00279	1.00165	0.987953	0.998503	0.982896	0.981861	1.00564		0.994232	0.00190275			1.0214	1.03287	1.03135	0.992998	1.00574	1.00155	1.0059	1.01004	1.00739	1.0158	0.997787	1.01119		1.01117	0.00356645		1.00288	0.991114	0.991641	0.987409	0.995716	1.00672	0.998351	0.995454	0.994406	0.992024	1.00059
3.02857	0.989729	0.991707	0.985701	0.997053	0.991445	0.995277	0.975817	0.997615	0.988169	1.00286	1.00369	0.990301	1.00426	0.976934	0.979581	1.00526		0.992213	0.00237494			1.02238	1.0285	1.03175	0.995101	1.00784	1.00386	1.00488	1.00333	1.00856	1.01877	0.99764	1.01592		1.01154	0.00341766		0.999645	0.990615	0.990606	0.987359	0.995293	1.00871	0.997455	0.994919	0.996064	0.992052	0.997928
3.0366	0.992248	0.995691	0.992557	0.999787	0.994663	0.99822	0.983715	0.999269	0.987022	1.00066	0.996887	0.986335	1.00162	0.980345	0.981704	1.01176		0.993905	0.0021058			1.0231	1.03335	1.02997	0.992654	1.00897	1.00381	1.00881	1.00461	1.00758	1.01965	0.998879	1.01075		1.01185	0.00355562		1.00622	0.992613	0.994399	0.990642	0.998568	1.00464	1.00001	0.997804	0.995752	0.991621	0.99801
3.04463	0.993005	0.996861	0.990124	0.999242	0.993377	0.99655	0.982484	0.995728	0.993056	1.00309	1.00246	0.986898	1.00191	0.980606	0.982193	1.00869		0.994142	0.00203753			1.0214	1.03066	1.03091	0.9953	1.00847	1.00272	1.00632	1.00468	1.00797	1.02048	0.999434	1.01721		1.01213	0.00340513		1.00377	0.990455	0.993001	0.986399	0.997378	1.00635	0.995834	0.995444	0.995125	0.990774	1.00105
3.05267	0.991456	0.997625	0.986257	1.00188	0.998361	0.999576	0.987244	1.00041	0.989564	1.00272	1.00738	0.988017	1.00084	0.978538	0.979985	1.00756		0.994839	0.00227671			1.02245	1.0317	1.03476	0.995372	1.01054	1.00425	1.00416	1.00423	1.00701	1.02012	0.999453	1.0164		1.01254	0.00363077		1.00111	0.991666	0.989141	0.990101	0.995799	1.00708	0.996259	0.992143	0.99412	0.99	0.998141
3.0607	0.992328	0.998065	0.98931	0.999484	0.995894	1.00002	0.985888	0.997713	0.990026	1.00381	1.0025	0.988095	1.00066	0.979425	0.981715	1.01152		0.994778	0.0021552			1.02412	1.03683	1.03378	0.996269	1.00694	1.00603	1.00852	1.00724	1.00783	1.02251	1.00111	1.02171		1.01441	0.0037461		1.00421	0.991877	0.993441	0.988483	0.998005	1.007	0.995956	0.992399	0.994875	0.990058	0.997705
3.06873	0.990754	0.993636	0.985866	0.999814	0.994221	0.996074	0.98279	0.998341	0.988321	1.005	1.0102	0.987433	1.00352	0.98262	0.984641	1.01059		0.994614	0.00232311			1.02369	1.03605	1.0352	0.998822	1.00617	1.00676	1.00512	1.00422	1.00708	1.02057	1.00076	1.01861		1.01359	0.00372708		1.00527	0.990888	0.99381	0.98837	0.996529	1.00673	0.995802	1.00158	0.998027	0.995253	1.00236
3.07677	0.993933	0.996246	0.989933	1.00405	0.998753	1.00116	0.98562	0.99734	0.988882	1.00224	1.00925	0.991723	1.00286	0.979737	0.980355	1.00791		0.995624	0.00226278			1.02087	1.03269	1.03702	0.997883	1.00491	1.00633	1.01005	1.00347	1.00933	1.02501	1.00282	1.02379		1.01451	0.0037079		1.00495	0.996154	0.992473	0.991714	0.996423	1.00544	1.0002	0.997624	0.997429	0.997184	1.00298
3.0848	0.993541	0.997694	0.986671	1.00249	0.989215	0.992397	0.980313	0.996941	0.99371	1.00683	1.01141	0.990996	1.0058	0.983289	0.985707	1.00591		0.995183	0.00230982			1.0248	1.03229	1.03454	0.998513	1.00784	1.00377	1.00982	1.01106	1.00656	1.02211	1.00005	1.02153		1.01441	0.00353773		1.00587	0.991465	0.994502	0.990439	0.999596	1.00749	0.996332	0.99477	0.995588	0.992982	1.0009
3.09283	0.9963	0.998334	0.990186	0.997759	0.993111	1.00076	0.987603	0.99899	0.9891	1.00233	1.0058	0.986026	0.997261	0.981654	0.978938	1.00692		0.994442	0.00205652			1.02203	1.03563	1.03598	0.99617	1.00918	1.005	1.00761	1.00947	1.01156	1.02574	1.00272	1.02436		1.01546	0.00374603		1.00385	0.994153	0.993059	0.991634	0.997505	1.00754	0.995845	0.997637	0.997131	0.991971	1.00322
3.10087	0.993845	0.996841	0.986318	1.00169	0.995614	1.00157	0.985281	0.998701	0.98994	1.00588	1.0081	0.987582	1.00326	0.980512	0.980106	1.00415		0.994962	0.00226451			1.02398	1.03737	1.03861	0.997589	1.00625	1.00357	1.01214	1.00885	1.00643	1.03115	1.00239	1.02924		1.01646	0.00423324		1.00059	0.989567	0.992189	0.987446	0.993865	1.00627	0.999133	0.999404	0.994048	0.991919	1.00078
3.1089	0.993665	0.998337	0.990211	0.999175	0.98856	0.99487	0.983476	0.99537	0.991105	1.00448	1.0074	0.98849	1.00095	0.982054	0.985765	1.00993		0.994615	0.00207949			1.02557	1.03734	1.03914	0.993639	1.009	1.00752	1.00529	1.00214	1.00945	1.02851	1.00399	1.02787		1.01579	0.00434685		1.00458	0.990495	0.99457	0.989836	0.996536	1.00664	0.999544	0.999768	0.997169	0.991396	1.00336
3.11693	0.99263	0.997053	0.986456	1.00544	0.988416	1.00015	0.982313	0.996429	0.987286	1.00565	1.00988	0.990199	1.00097	0.984495	0.98432	1.00894		0.995039	0.00232428			1.02639	1.03429	1.03628	0.993767	1.00716	1.0064	1.01353	1.00721	1.00699	1.03126	1.00387	1.02689		1.01617	0.00406464		0.99996	0.993157	0.992818	0.987118	0.995676	1.00645	0.99818	1.00149	0.996822	0.994912	1.00335
3.12497	0.993599	1.00072	0.98978	1.00239	0.988721	0.999773	0.986788	0.996664	0.985302	1.00593	1.01617	0.993017	1.00602	0.984774	0.988222	1.01534		0.997075	0.00252584			1.02306	1.03685	1.04055	0.998422	1.00594	1.00784	1.0041	1.01474	1.00816	1.02873	1.00498	1.03125		1.01705	0.00414851		0.999869	0.995038	0.99334	0.990674	0.998165	1.00874	0.998868	0.997842	0.995547	0.994018	1.00175
3.133	0.993116	0.997127	0.986722	1.00169	0.990177	0.998135	0.980226	0.998773	0.989305	1.00666	1.00852	0.989192	1.00166	0.983167	0.981763	1.00246		0.994294	0.00221669			1.0261	1.04385	1.03951	0.995362	1.00828	1.01132	1.0116	1.01117	1.00604	1.03145	1.00316	1.03205		1.01832	0.00450234		1.00673	0.996765	0.997953	0.99378	0.998394	1.00791	1.00256	1.0036	0.996407	0.996817	1.00417
3.14103	0.992514	1.00435	0.987621	1.00202	0.990422	1.0009	0.98291	0.997058	0.990078	1.00792	1.01059	0.994901	1.0029	0.982061	0.986337	1.01086		0.996465	0.00238025			1.02416	1.0398	1.0378	0.993649	1.00966	1.01239	1.00894	1.01002	1.00667	1.03328	1.00377	1.03694		1.01809	0.00449514		1.00549	0.993705	0.993631	0.991081	0.996446	1.00762	0.999033	0.998323	0.994926	0.992911	1.0022
3.14907	0.992355	1.0007	0.988788	1.00507	0.991413	0.999852	0.989502	0.997815	0.989549	1.00927	1.01206	0.988299	1.00322	0.983258	0.984261	1.01105		0.996654	0.00237884			1.02671	1.04044	1.04341	0.996443	1.00742	1.00758	1.00892	1.01233	1.00414	1.03404	1.00384	1.03602		1.01844	0.00476462		1.00676	0.99407	0.994495	0.991227	0.999097	1.00664	0.999725	0.997924	1.00055	0.992544	1.00215
3.1571	0.991448	0.998283	0.988242	1.00063	0.991308	1.00032	0.988046	0.997503	0.98907	1.00388	1.01047	0.986269	0.997584	0.985433	0.985051	1.0065		0.995002	0.00199613			1.0278	1.04726	1.03952	0.998577	1.01108	1.00909	1.01008	1.00799	1.00715	1.03703	1.00378	1.03746		1.01974	0.00485175		1.0052	0.995075	0.994617	0.98797	0.998767	1.00549	0.996454	0.996506	0.995432	0.993284	1.00673
3.16513	0.994647	1.00225	0.98914	1.00614	0.988276	0.995415	0.98553	0.99724	0.9924	1.00907	1.01076	0.988044	1.00109	0.986946	0.983587	1.00474		0.995954	0.0022031			1.02997	1.03838	1.04171	0.99903	1.01127	1.01061	1.00826	1.01152	1.00763	1.03659	1.00515	1.04132		1.02012	0.00462668		1.00132	0.995049	0.992291	0.988491	0.995967	1.00827	0.996545	1.00055	0.997448	0.994729	1.00249
3.17317	0.996357	1.00138	0.991759	1.00355	0.989165	0.998422	0.986429	0.996685	0.989532	1.00748	1.01216	0.991588	1.00373	0.984014	0.987127	1.01325		0.997039	0.0022961			1.0303	1.04837	1.04375	0.995352	1.0062	1.01189	1.01652	1.01172	1.00971	1.03934	1.00494	1.04289		1.02175	0.00523229		1.00371	0.994014	0.994691	0.988052	0.997325	1.0107	0.997654	0.997665	0.994871	0.991229	1.0036
3.1812	0.992569	1.00319	0.98832	1.00264	0.990292	0.997814	0.981744	0.997479	0.991014	1.00831	1.00782	0.993104	1.00115	0.986185	0.98855	1.01502		0.996575	0.00229768			1.02917	1.04162	1.0439	0.997985	1.0016	1.00273	1.00977	1.01254	1.00802	1.03992	1.00555	1.04471		1.01979	0.0053395		1.00463	0.995684	0.99295	0.990545	1.0011	1.00957	0.998925	1.00189	0.995899	0.994573	1.00452
3.18923	0.993015	0.998664	0.991147	0.998334	0.986983	0.994205	0.981621	0.995989	0.990913	1.0095	1.01048	0.991985	1.00428	0.98491	0.98849	1.00477		0.99533	0.00212893			1.02811	1.04706	1.04508	0.995022	1.00939	1.00825	1.01618	1.01706	1.00871	1.03977	1.00934	1.04545		1.02245	0.00517297		1.00513	0.993407	0.993768	0.987526	0.999015	1.00885	0.997847	1.00079	0.996853	0.996138	1.00672
3.19727	0.993484	1.00126	0.986927	1.00307	0.98936	1.00027	0.982682	0.997759	0.989885	1.00882	1.01095	0.990882	1.00364	0.986941	0.984973	1.0099		0.996301	0.00234021			1.03023	1.04173	1.04267	0.997571	1.00633	1.0143	1.01224	1.01149	1.01024	1.04163	1.0067	1.05069		1.02215	0.00520227		1.00393	0.9917	0.995244	0.989015	1.00174	1.00819	0.997858	1.00043	0.995562	0.992404	1.00386
3.2053	0.994106	1.0013	0.991085	1.00295	0.992354	0.998387	0.988202	0.998115	0.990674	1.01042	1.01604	0.988736	1.00342	0.98549	0.994751	1.01853		0.99841	0.00246726			1.02919	1.04502	1.04589	1.00141	1.00938	1.0077	1.0161	1.01441	1.00792	1.0426	1.00701	1.05101		1.02314	0.00529855		1.00539	0.992859	0.997059	0.988949	1.00046	1.00861	0.995153	1.00066	0.997636	0.99566	1.00723
3.21333	0.991187	1.00543	0.991286	1.00417	0.992666	1.00077	0.989019	0.99861	0.986982	1.0105	1.01729	0.989616	1.00348	0.981783	0.991326	1.01404		0.998009	0.00259548			1.02955	1.04194	1.04535	0.999394	1.00506	1.01486	1.01258	1.01101	1.00846	1.04566	1.00743	1.05382		1.02293	0.0055154		1.00532	0.993498	0.996443	0.991593	1.00136	1.0095	0.996824	1.00191	1.00264	0.996074	1.01058
3.22137	0.991626	1.00067	0.992397	1.00299	0.991849	0.99622	0.983008	0.996376	0.99194	1.01292	1.01237	0.990901	1.00493	0.985736	0.985738	1.0085		0.996761	0.00234802			1.03264	1.04768	1.04637	0.999576	1.00723	1.01199	1.01272	1.01569	1.00868	1.04488	1.00658	1.05486		1.02408	0.0056946		1.00502	0.993002	0.995986	0.991698	0.996538	1.01019	0.997386	1.00329	0.995898	0.99703	1.0064
3.2294	0.992244	1.00487	0.991487	1.00428	0.992348	0.996537	0.982273	0.997629	0.986351	1.00998	1.01625	0.99066	1.0041	0.988017	0.98661	1.00903		0.997041	0.00248617			1.03275	1.04422	1.05003	0.999306	1.00825	1.01234	1.01141	1.01243	1.00652	1.04669	1.01093	1.05728		1.02435	0.0058687		1.00511	0.994138	0.996822	0.991562	1.00005	1.00964	0.997633	1.00174	0.996846	0.992039	1.00588
3.23743	0.992292	1.00346	0.995186	1.00605	0.986479	0.994723	0.987128	0.997864	0.99216	1.0109	1.01131	0.988663	1.00259	0.98355	0.982507	1.00428		0.996196	0.00234402			1.03118	1.05078	1.04752	1.0009	1.0104	1.01388	1.01191	1.0126	1.00614	1.04507	1.01078	1.0576		1.0249	0.0058231		1.00882	0.992866	0.995726	0.993298	0.999376	1.01147	0.997105	1.0012	0.999546	0.996685	1.0057
3.24547	0.994537	1.00389	0.990522	1.00684	0.992902	0.992787	0.984081	0.998354	0.990842	1.01313	1.01738	0.992267	1.00052	0.984883	0.993857	1.01236		0.998072	0.0025149			1.03514	1.04498	1.04901	1.00109	1.01061	1.01309	1.01954	1.01523	1.00775	1.04948	1.01069	1.06248		1.02659	0.00590347		1.00799	0.992072	0.997265	0.989298	0.999776	1.00699	0.995104	1.00311	0.997053	0.99818	1.00691
3.2535	0.988844	1.00498	0.992033	1.00605	0.993974	0.993841	0.986865	0.999623	0.990011	1.00954	1.00942	0.988332	1.00371	0.983274	0.992406	1.0083		0.99695	0.00222025			1.0334	1.04766	1.04862	0.999802	1.01107	1.01371	1.02014	1.01185	1.00842	1.05025	1.00888	1.06579		1.02663	0.00621565		1.00949	0.9969	0.999129	0.993429	1.00198	1.00827	0.994524	1.00388	0.998266	0.994666	1.0065
3.26153	0.990185	1.00146	0.99138	1.00255	0.996499	0.99714	0.988413	0.999203	0.989861	1.01331	1.01433	0.993259	1.00734	0.987614	0.996049	1.01493		0.998971	0.00232249			1.03615	1.04658	1.05211	1.00224	1.01285	1.01344	1.01107	1.01418	1.00967	1.05319	1.0087	1.06603		1.02719	0.0063701		1.00264	0.994122	0.996945	0.991744	1.00222	1.00601	0.992443	1.00462	0.995768	0.991305	1.0073
3.26957	0.993421	0.999602	0.989726	1.0064	0.988595	0.989193	0.983752	0.998154	0.993191	1.01421	1.01587	0.998836	1.00754	0.989422	0.988604	1.00496		0.997592	0.0024462			1.0364	1.04973	1.05317	0.998819	1.01378	1.0164	1.00973	1.01709	1.01083	1.0553	1.00826	1.07028		1.02832	0.00676051		1.00758	0.995638	0.999847	0.988175	1.00534	1.01156	0.996623	1.00766	1.0013	0.99934	1.01228
3.2776	0.993374	1.00419	0.992694	1.01067	0.992878	0.99146	0.984935	0.999661	0.9888	1.013	1.01835	0.994542	1.00627	0.987324	0.989544	1.0078		0.998469	0.00256024			1.03498	1.04847	1.05337	1.00265	1.00904	1.01556	1.01357	1.0135	1.00694	1.05559	1.01135	1.07001		1.02792	0.00670479		1.00831	0.998035	0.999275	0.991088	1.00509	1.00964	0.997581	1.00187	0.996339	0.992232	1.00648
3.28563	0.988268	1.00065	0.993651	1.00574	0.990037	0.991555	0.981619	0.997938	0.992758	1.01354	1.01153	0.988812	1.0057	0.98519	0.987968	1.01664		0.996974	0.0026962			1.0401	1.0511	1.05425	1.00386	1.01037	1.01449	1.01834	1.01601	1.00594	1.05916	1.01311	1.07332		1.03	0.0069453		1.01149	0.994956	0.998193	0.992203	1.0028	1.00943	0.999077	1.00438	0.996191	0.996961	1.00937
3.29367	0.992807	1.0045	0.992002	1.00811	0.990604	0.994085	0.981717	0.998808	0.988891	1.01364	1.01363	0.991814	1.0097	0.985135	0.988916	1.0072		0.997598	0.00259842			1.03912	1.05157	1.05618	1.00228	1.01023	1.01816	1.01378	1.01401	1.00766	1.05631	1.01323	1.07685		1.02995	0.00713472		1.00659	0.991413	0.997257	0.988996	1.00109	1.00798	0.995172	1.00693	0.999015	0.99853	1.00604
3.3017	0.994799	1.00406	0.992821	1.00645	0.991839	0.993965	0.985449	0.99873	0.991899	1.01747	1.01676	0.994232	1.00673	0.984633	0.989677	1.01112		0.99879	0.00260312			1.04001	1.05024	1.05857	1.00128	1.00616	1.01035	1.01297	1.02128	1.00439	1.06047	1.0143	1.07992		1.02999	0.0076841		1.00887	0.991167	0.999157	0.991543	1.00202	1.01083	0.993741	1.00577	0.997028	0.998295	1.0097
3.30973	0.989824	1.00472	0.991748	1.00653	0.998848	0.993087	0.989796	1.00044	0.992741	1.01355	1.01378	0.990339	1.00495	0.984951	0.98902	1.01055		0.99843	0.00237434			1.03538	1.04859	1.05565	0.999649	1.00911	1.02066	1.01573	1.02349	1.00826	1.06201	1.0161	1.08031		1.03124	0.00724372		1.01042	0.992166	0.998846	0.99386	1.00176	1.00561	0.994391	1.00662	0.996063	0.995253	1.01029
3.31777	0.995023	1.00525	0.994415	1.00923	0.993184	0.991334	0.986256	0.999161	0.991026	1.01631	1.01722	0.99379	1.00658	0.988162	0.994162	1.01216		0.999579	0.00252018			1.03343	1.04685	1.06063	1.00049	1.01092	1.0191	1.01476	1.02103	1.00605	1.06272	1.01627	1.08356		1.03132	0.00757789		1.00607	0.989598	0.997377	0.988257	1.00005	1.00966	0.994421	1.0048	0.998326	0.999094	1.00941
3.3258	0.99395	1.00464	0.990714	1.00779	0.996009	0.992532	0.98369	1.00062	0.989724	1.01518	1.02088	0.991659	1.00697	0.989725	0.99356	1.01522		0.999555	0.00274544			1.03592	1.04616	1.0588	1.00319	1.01014	1.01643	1.01769	1.0234	1.00731	1.06569	1.0173	1.08866		1.03256	0.00775169		1.00996	0.992714	1.00076	0.991738	1.00593	1.00876	0.994606	1.00585	1.00091	0.998838	1.01161
3.33383	0.992226	1.00318	0.989999	1.01168	0.991749	0.983236	0.98336	0.999371	0.994087	1.01678	1.01921	0.99458	1.00682	0.985073	0.996844	1.016		0.999013	0.0030057			1.04172	1.04934	1.06083	1.00358	1.01277	1.02061	1.01412	1.01733	1.00489	1.0667	1.01748	1.08762		1.03308	0.00792862		1.01025	0.992456	1.0009	0.989963	1.00251	1.01179	0.995318	1.00783	0.99606	0.994311	1.00919
3.34187	0.994799	1.00607	0.988264	1.00582	0.998744	0.992591	0.987739	1.00164	0.992585	1.01509	1.02106	0.996844	1.00901	0.986452	0.991557	1.00834		0.999788	0.00257095			1.03888	1.05034	1.06303	1.00323	1.00935	1.02069	1.01141	1.02081	1.00782	1.07	1.02012	1.09189		1.03396	0.00829169		1.0138	0.992139	1.0024	0.993075	1.00304	1.00942	0.993737	1.0079	0.998532	0.998974	1.01078
3.3499	0.991925	1.00431	0.988842	1.00364	0.995115	0.988226	0.983833	0.99827	0.992032	1.0186	1.02199	0.995088	1.00664	0.982058	0.989996	1.01479		0.99846	0.00303637			1.04097	1.0537	1.06393	1.00057	1.00625	1.01546	1.01684	1.01558	1.00451	1.06909	1.01645	1.09227		1.03297	0.0086991		1.01039	0.996984	1.00265	0.991241	1.0053	1.01078	0.995975	1.00458	0.999734	0.995842	1.00871
3.35793	0.992108	1.00377	0.986106	1.00662	0.992749	0.987644	0.982243	0.997175	0.993319	1.01787	1.01451	0.989693	1.00904	0.986733	0.994454	1.01376		0.997987	0.00283979			1.04118	1.05439	1.06496	1.0035	1.00794	1.01921	1.02045	1.01955	1.00689	1.07369	1.02042	1.09638		1.03571	0.00870241		1.01461	0.991653	0.997586	0.996334	1.0055	1.00878	0.993191	1.00884	0.997773	0.995834	1.01388
3.36597	0.992625	1.00444	0.990023	1.00688	0.990709	0.984291	0.980669	0.998575	0.995094	1.01759	1.02083	0.992124	1.0062	0.988869	0.995497	1.02386		0.999267	0.00322919			1.04095	1.05495	1.06697	1.00064	1.01187	1.01825	1.01725	1.01709	1.01059	1.07161	1.02369	1.10067		1.03621	0.00889633		1.01048	0.992702	1.00047	0.99033	1.00445	1.01119	0.996084	1.00896	0.997905	0.996008	1.01469
3.374	0.989209	1.00513	0.986679	1.00731	0.990599	0.981317	0.979827	0.996256	0.99378	1.01844	1.02562	0.997751	1.01025	0.986766	0.994045	1.0217		0.999042	0.00356126			1.04509	1.05639	1.06551	1.0036	1.01028	1.02056	1.01117	1.01882	1.00793	1.07093	1.02308	1.10604		1.03662	0.00925494		1.01004	0.988601	1.00046	0.991121	1.00446	1.01255	0.998449	1.01182	0.997183	1.00092	1.01193
3.38203	0.988907	1.00538	0.987562	1.00531	0.993246	0.982864	0.978558	1.00011	0.994609	1.0181	1.02173	0.995105	1.00809	0.989049	0.999292	1.01831		0.999139	0.00322481			1.04465	1.06525	1.06793	1.00141	1.01188	1.02481	1.01616	1.02112	1.00616	1.07078	1.02553	1.10498		1.03839	0.0092797		1.01153	0.991131	1.00341	0.992908	1.0063	1.01313	0.995266	1.00648	0.996296	0.99883	1.01236
3.39007	0.992135	1.00802	0.986093	1.00669	0.994977	0.980196	0.983916	0.999648	0.995009	1.02113	1.02252	0.995936	1.00915	0.990635	0.99729	1.01722		1.00004	0.00323427			1.04525	1.06139	1.06948	1.0047	1.01016	1.02536	1.02089	1.02275	1.01066	1.07483	1.02712	1.10711		1.03997	0.00917433		1.01231	0.995528	1.00117	0.994552	1.00513	1.00888	0.99559	1.01034	1.00085	0.999171	1.01535
3.3981	0.9908	1.00648	0.988176	1.00791	0.991224	0.983622	0.978838	0.998432	0.994532	1.02224	1.01991	0.9936	1.00934	0.989057	0.997445	1.02401		0.999726	0.00346111			1.04519	1.06085	1.07388	1.00232	1.01026	1.02495	1.01975	1.02421	1.00999	1.07443	1.02747	1.10914		1.0402	0.00946404		1.01262	0.996024	1.0011	0.994398	1.00973	1.01066	0.996284	1.01225	1.00218	0.997499	1.01464
3.40613	0.99046	1.00456	0.987441	1.00666	0.990571	0.985001	0.980248	0.999633	0.993409	1.02227	1.02012	0.99321	1.00998	0.988586	0.993313	1.01927		0.999045	0.00331631			1.04508	1.05824	1.07238	1.00296	1.01255	1.0303	1.01842	1.02042	1.00826	1.07459	1.0298	1.11214		1.04043	0.00952896		1.01212	0.993514	1.00004	0.994497	1.00684	1.00734	0.997182	1.00732	0.999136	0.996692	1.01512
3.41417	0.991479	1.00976	0.988151	1.0101	0.991859	0.980841	0.97867	0.998508	0.994624	1.02274	1.02184	0.993028	1.0098	0.986681	0.99585	1.01962		0.999597	0.00356229			1.04863	1.06166	1.07475	1.00437	1.01204	1.0283	1.01919	1.02416	1.01033	1.07387	1.0307	1.11459		1.04188	0.00963694		1.01377	0.994277	1.00534	0.996521	1.00524	1.00955	0.996152	1.01198	0.99945	0.997225	1.01604
3.4222	0.994051	1.00812	0.991943	1.00996	0.990453	0.982319	0.978489	0.99905	0.995412	1.02301	1.01821	0.995405	1.01061	0.991298	0.999552	1.03075		1.00116	0.00362189			1.04987	1.06139	1.07569	1.00779	1.01637	1.02947	1.02193	1.02271	1.0113	1.07616	1.03075	1.11307		1.04304	0.00937681		1.00899	0.993228	0.999681	0.99297	1.00584	1.01007	0.994433	1.01102	1.00026	0.99798	1.01435
3.43023	0.994952	1.00575	0.993415	1.01493	0.994062	0.983309	0.98183	0.999596	0.994086	1.02089	1.02636	0.996937	1.01155	0.990369	0.995221	1.0173		1.00128	0.00333323			1.04835	1.05956	1.07608	1.00492	1.01258	1.03223	1.0207	1.02368	1.01132	1.07954	1.03683	1.12168		1.04395	0.0100437		1.01048	0.991486	1.00039	0.991825	1.00474	1.01235	0.997764	1.01356	1.00096	0.997424	1.01639
3.43827	0.992719	1.00434	0.987552	1.01064	0.99447	0.985422	0.978887	0.999177	0.997215	1.02178	1.02349	0.995211	1.0107	0.991804	0.992384	1.02431		1.00063	0.0034824			1.0486	1.06413	1.07918	1.00758	1.0125	1.03174	1.02197	1.02755	1.0126	1.08292	1.03574	1.1236		1.04567	0.0102098		1.01454	0.999766	1.00392	0.995893	1.00773	1.01274	0.997254	1.00997	0.999459	0.994451	1.01505
3.4463	0.994531	1.00694	0.989861	1.01083	0.993061	0.98502	0.9776	0.998502	0.993143	1.02474	1.02547	0.998051	1.01322	0.990158	1.00221	1.02914		1.00203	0.0037892			1.05189	1.06785	1.077	1.00687	1.01673	1.03419	1.02019	1.0218	1.01361	1.08308	1.03429	1.1258		1.04611	0.0103648		1.01269	0.990068	1.00088	0.993748	1.00662	1.00906	0.99565	1.01089	0.9995	0.996284	1.01578
3.45433	0.9921	1.00709	0.98973	1.01263	0.994469	0.98592	0.98317	1.0001	0.997928	1.02575	1.02321	0.996226	1.01269	0.991556	0.995612	1.02585		1.00213	0.00351046			1.05186	1.06497	1.07963	1.007	1.01683	1.03723	1.01953	1.02987	1.01228	1.0865	1.03492	1.12564		1.04719	0.0103577		1.01558	0.997609	1.00646	0.999825	1.0106	1.00975	0.994982	1.01367	1.00169	0.999024	1.01804
3.46237	0.993721	1.01035	0.99167	1.01386	0.992265	0.986737	0.980397	1.00034	0.993697	1.0222	1.02026	0.993444	1.01186	0.989905	0.998861	1.03057		1.00188	0.00361452			1.05166	1.0655	1.08394	1.00556	1.01679	1.03538	1.01948	1.0253	1.01319	1.08246	1.03563	1.12924		1.04701	0.0106651		1.01306	0.997094	1.00345	0.995957	1.00848	1.01401	0.996723	1.01398	0.999701	1.0011	1.01946
3.4704	0.993855	1.01205	0.991965	1.0113	0.993776	0.986129	0.978909	0.998524	0.996001	1.0241	1.02284	0.998997	1.01482	0.990768	0.992833	1.02932		1.00226	0.00371191			1.05417	1.07132	1.08326	1.00588	1.01337	1.03721	1.0188	1.02191	1.01228	1.08736	1.03347	1.12916		1.04735	0.0110323		1.01424	0.994365	1.00174	0.997432	1.01211	1.01202	0.997275	1.01466	0.999414	0.999534	1.01875
3.47843	0.994201	1.00866	0.987162	1.00909	0.992778	0.983721	0.981699	0.998653	0.994717	1.02306	1.02136	0.998595	1.01318	0.989758	0.993909	1.02983		1.00127	0.00365575			1.05261	1.07598	1.08347	1.00713	1.01806	1.04287	1.02003	1.02484	1.01746	1.08966	1.0435	1.13425		1.05082	0.0110119		1.01362	0.997776	1.00413	0.998224	1.00972	1.01374	0.995969	1.0177	1.00097	0.998387	1.01886
3.48647	0.992892	1.01071	0.988402	1.01219	0.99573	0.983564	0.982956	0.999715	0.999305	1.02758	1.02262	0.99416	1.01096	0.992132	0.990981	1.03024		1.00213	0.00378576			1.05444	1.07415	1.08705	1.00684	1.01711	1.03638	1.0208	1.0237	1.0151	1.09008	1.03854	1.13493		1.04993	0.011288		1.01257	0.99599	1.00462	0.993499	1.00763	1.0132	0.997726	1.01592	0.998831	1.00122	1.02061
3.4945	0.991282	1.00835	0.988857	1.01393	0.996562	0.990999	0.986289	1.00015	0.998637	1.02595	1.02986	0.997275	1.00972	0.986853	0.997662	1.03828		1.00379	0.0039933			1.05585	1.07165	1.08285	1.0083	1.01893	1.04096	1.02008	1.02695	1.01581	1.09397	1.04014	1.13759		1.05109	0.0112319		1.01259	0.999599	1.00527	0.997168	1.01011	1.0111	0.997863	1.01122	1.00065	0.995841	1.01866
3.50253	0.99365	1.0095	0.986671	1.01544	0.993508	0.983226	0.978329	0.999345	0.998313	1.02688	1.02176	0.994721	1.01114	0.991998	1.00022	1.02909		1.00211	0.00383525			1.05669	1.07623	1.08544	1.00527	1.01742	1.04203	1.01819	1.02466	1.01696	1.09589	1.04543	1.14255		1.05223	0.0118361		1.01205	0.998765	1.00847	0.995316	1.01145	1.01085	0.995668	1.02066	1.0023	1.0032	1.02153
3.51057	0.994371	1.00966	0.99044	1.01292	0.996323	0.983862	0.979431	1.00187	0.998989	1.02673	1.02152	0.992665	1.01393	0.995534	0.999937	1.02833		1.00291	0.00365038			1.05859	1.07705	1.08567	1.00679	1.02229	1.04634	1.02485	1.02803	1.01464	1.0969	1.04368	1.14283		1.05397	0.0115992		1.01058	0.993525	1.00267	0.993892	1.00645	1.01459	0.999102	1.01564	1.00039	0.998377	1.02209
3.5186	0.995704	1.01081	0.991511	1.01391	0.992392	0.985462	0.981672	1.00016	0.997564	1.02688	1.02601	0.995372	1.00867	0.991023	0.99949	1.0326		1.00308	0.0038188			1.05915	1.07905	1.0918	1.00629	1.01847	1.04348	1.02308	1.02832	1.01406	1.09616	1.0462	1.14549		1.0543	0.0120451		1.01146	0.995466	1.00575	0.9934	1.01173	1.01211	0.995727	1.01843	1.0004	0.998753	1.02099
3.52663	0.994402	1.00982	0.98737	1.01185	0.995539	0.982452	0.980447	1.00267	0.996606	1.02752	1.02502	0.995902	1.01255	0.993618	0.994789	1.03504		1.00285	0.00402076			1.05966	1.07533	1.09148	1.00474	1.01904	1.04115	1.02399	1.02688	1.01552	1.09993	1.04658	1.14742		1.05431	0.0122208		1.01054	0.996361	1.00352	0.994582	1.01015	1.01538	0.997299	1.01843	1.00366	1.00026	1.0223
3.53467	0.995044	1.00782	0.989004	1.0144	0.995962	0.985298	0.979128	0.999666	0.99849	1.02703	1.02623	0.994802	1.01159	0.990584	0.995279	1.03817		1.00303	0.00412569			1.06003	1.07797	1.0915	1.00648	1.02112	1.04667	1.02096	1.02608	1.01815	1.10383	1.05468	1.15391		1.05678	0.0125945		1.01114	0.999167	1.00716	0.995571	1.00891	1.01433	0.993866	1.01261	0.999246	0.999679	1.02125
3.5427	0.994589	1.0108	0.989757	1.01463	0.994428	0.976758	0.97631	0.998919	1.00286	1.03249	1.02198	0.997417	1.01062	0.99331	0.996243	1.03314		1.00277	0.00423273			1.06403	1.07506	1.09468	1.00995	1.02105	1.04386	1.02625	1.02951	1.01527	1.10335	1.05243	1.15393		1.05745	0.0124554		1.01649	0.997131	1.00355	0.996088	1.00774	1.01079	0.993102	1.01786	1.00202	1.00177	1.02212
3.55073	0.996694	1.00833	0.98825	1.01469	0.993209	0.97897	0.976277	0.998863	0.998988	1.02881	1.02759	0.9942	1.01304	0.991705	0.998003	1.02957		1.00232	0.004155			1.06302	1.07898	1.09295	1.00975	1.01924	1.04853	1.02269	1.02737	1.0156	1.10444	1.05404	1.15434		1.05758	0.0126249		1.01385	0.995888	1.00537	0.994864	1.00942	1.01335	0.996362	1.01973	1	0.999737	1.02369
3.55877	0.992777	1.01189	0.987468	1.01466	0.993705	0.976678	0.970622	0.997291	0.999183	1.02913	1.02722	0.996592	1.01265	0.990516	1.00192	1.04041		1.00267	0.00474048			1.06387	1.0778	1.09617	1.00928	1.02057	1.04505	1.02409	1.02991	1.01769	1.10486	1.05709	1.15674		1.05859	0.0127122		1.01598	0.996262	1.00628	0.996178	1.01276	1.01126	0.995021	1.01719	1.00119	0.999904	1.0248
3.5668	0.996193	1.00673	0.988146	1.01637	0.995225	0.990914	0.980145	1.00099	0.999051	1.02805	1.02996	0.995568	1.01475	0.992101	1.00033	1.03054		1.00407	0.00388453			1.06355	1.08298	1.09948	1.00975	1.01997	1.05275	1.03071	1.03132	1.01816	1.10678	1.0587	1.16204		1.06135	0.0129949		1.01086	0.99642	1.00432	0.998348	1.01055	1.01547	0.998115	1.02002	1.00103	1.00302	1.02651
3.57483	0.995256	1.01205	0.987844	1.01358	0.995123	0.983772	0.980382	1.00084	0.9977	1.0313	1.03044	0.995621	1.01439	0.991321	0.999094	1.03404		1.00392	0.00423271			1.06686	1.07652	1.09829	1.01213	1.02289	1.04863	1.03126	1.03101	1.01889	1.11111	1.05558	1.16069		1.06116	0.0128204		1.01408	0.99603	1.00913	0.99667	1.01037	1.01553	0.998126	1.01844	1.00046	1.00146	1.02307
3.58287	0.993817	1.01047	0.989427	1.01834	0.995725	0.986201	0.978715	0.999727	1.00449	1.03156	1.02953	0.99325	1.01597	0.994753	0.996575	1.03794		1.00478	0.00435888			1.06808	1.0803	1.10136	1.01128	1.02271	1.05515	1.02464	1.03468	1.02017	1.1099	1.06103	1.16175		1.06259	0.0129735		1.01892	0.998367	1.008	1.00034	1.01309	1.01396	0.995473	1.02183	1.00324	1.00163	1.02703
3.5909	0.997953	1.0091	0.988641	1.01935	0.998745	0.988369	0.981984	1.00124	0.999115	1.03412	1.03416	0.998192	1.01562	0.99344	0.996879	1.03909		1.006	0.00439566			1.06846	1.08	1.10385	1.01307	1.02362	1.05165	1.02707	1.02735	1.01553	1.10851	1.06092	1.16158		1.0618	0.0131286		1.01743	0.993413	1.00767	0.996644	1.01279	1.01684	0.999013	1.01963	0.999187	0.999902	1.02451
3.59893	0.995482	1.00825	0.984398	1.01514	0.994755	0.987073	0.97667	1.00148	0.999613	1.02848	1.03283	0.990173	1.00929	0.991934	1.00063	1.03537		1.00322	0.00434194			1.06804	1.08605	1.10436	1.00958	1.02199	1.05188	1.02408	1.02982	1.02146	1.11483	1.06347	1.1672		1.06357	0.0137086		1.01799	0.995996	1.01026	0.998308	1.01427	1.01563	0.998229	1.02311	0.999029	0.993694	1.02442
3.60697	0.996889	1.01051	0.987953	1.01419	0.996012	0.981425	0.976127	1.00154	1.00013	1.03347	1.03306	1.00011	1.0154	0.988302	1.00459	1.03543		1.0047	0.00452352			1.06967	1.08823	1.10509	1.01418	1.02677	1.05529	1.02849	1.0306	1.02209	1.11814	1.06502	1.16867		1.06602	0.0135466		1.01492	0.993004	1.00659	0.997823	1.01049	1.01674	0.995603	1.02375	1.00414	1.00147	1.02748
3.615	0.998337	1.01182	0.989537	1.0186	0.99676	0.98869	0.979924	1.00207	1.00262	1.03375	1.03066	1.0016	1.01606	0.990269	1.00742	1.03731		1.00659	0.00425132			1.06967	1.08693	1.10674	1.01532	1.02549	1.05434	1.02174	1.03565	1.02281	1.11739	1.06531	1.17033		1.06598	0.0136871		1.01892	0.999349	1.01082	0.997149	1.01628	1.00881	0.99217	1.0259	1.00187	0.995894	1.02599
3.62303	0.996206	1.0125	0.988488	1.02096	0.992595	0.987186	0.979155	0.999922	1.00458	1.03154	1.02697	0.996476	1.01341	0.996175	0.996306	1.03427		1.0048	0.00416633			1.06926	1.08499	1.10654	1.01304	1.02944	1.06032	1.03	1.03316	1.02022	1.12092	1.07022	1.17473		1.06774	0.0138931		1.01758	0.997891	1.00788	0.996389	1.01468	1.01405	0.993357	1.02709	0.999213	1.00287	1.02819
3.63107	0.995672	1.01278	0.990274	1.01991	0.993265	0.983731	0.974472	0.999721	1.00273	1.03397	1.03245	0.999483	1.00963	0.994116	1.0028	1.03631		1.00508	0.00451391			1.06981	1.08571	1.1107	1.01641	1.02963	1.05817	1.0269	1.03658	1.01962	1.11815	1.06704	1.1726		1.06761	0.0137186		1.01862	0.992672	1.00731	0.99564	1.01302	1.01747	0.997769	1.02053	1.00096	0.998309	1.02647
3.6391	0.996537	1.01044	0.98654	1.01872	0.990979	0.986768	0.976061	0.999909	1.00305	1.03568	1.02997	0.9933	1.01446	0.993776	1.00163	1.03947		1.00483	0.00462914			1.07469	1.08392	1.11509	1.01454	1.03036	1.05915	1.02124	1.0375	1.02445	1.12374	1.07376	1.17952		1.06983	0.0144119		1.01767	0.996072	1.00987	0.997789	1.01769	1.01239	0.996964	1.02889	1.00098	1.00276	1.02613
3.64713	0.998899	1.01581	0.987966	1.01685	0.994781	0.990321	0.973645	1.00099	1.00565	1.03661	1.0315	0.994378	1.0119	0.99586	1.00534	1.03774		1.00614	0.00451873			1.07433	1.08862	1.11435	1.01488	1.02719	1.06194	1.02402	1.03631	1.02517	1.12408	1.07199	1.17699		1.06999	0.0142765		1.01923	0.99408	1.01051	1.00005	1.01329	1.0167	0.997751	1.02499	1.00231	1.00084	1.02963
3.65517	0.996904	1.01008	0.989386	1.01521	0.992831	0.986672	0.974212	1.00153	1.00345	1.03409	1.0325	0.999161	1.01651	0.99519	1.00156	1.03988		1.00557	0.00455283			1.07297	1.09274	1.11399	1.0153	1.02702	1.0628	1.02934	1.0377	1.01995	1.1222	1.0721	1.17526		1.07011	0.0141325		1.01833	0.99355	1.01015	0.997206	1.01716	1.01714	0.998857	1.02307	1.00045	1.002	1.02904
3.6632	0.998795	1.00977	0.988662	1.01787	0.993539	0.983633	0.972355	1.00025	0.9985	1.033	1.03726	0.995875	1.0156	0.999573	1.00434	1.04415		1.00582	0.00490955			1.07398	1.09101	1.11765	1.01454	1.03037	1.06161	1.02669	1.02938	1.02372	1.12585	1.07526	1.17723		1.07061	0.0145001		1.01934	0.996478	1.00899	0.998592	1.01529	1.01332	0.995188	1.0243	1.0029	1.00377	1.02998
3.67123	0.998493	1.00704	0.988587	1.01847	0.993757	0.982758	0.977095	0.99921	1.00209	1.03408	1.03538	1.00176	1.0177	0.998025	1.00038	1.04192		1.00605	0.0046972			1.07525	1.08472	1.11881	1.01693	1.03448	1.06666	1.02422	1.03474	1.02041	1.1252	1.07652	1.17908		1.07142	0.0144279		1.01648	0.994488	1.01161	0.997262	1.01781	1.01792	0.999266	1.02824	1.00431	1.00363	1.03122
3.67927	1.00047	1.01296	0.992686	1.022	0.994277	0.987584	0.977671	0.999795	1.00334	1.03598	1.03184	0.992836	1.0164	0.996196	1.00116	1.03969		1.00656	0.00453444			1.07863	1.08702	1.11872	1.01432	1.02783	1.06713	1.02918	1.03354	1.02754	1.13113	1.08099	1.18546		1.07346	0.0149412		1.02199	0.996433	1.011	0.998383	1.01772	1.01381	1.00131	1.02454	1.00302	1.00444	1.03223
3.6873	0.99892	1.01085	0.987695	1.01843	0.99709	0.989601	0.979876	1.00195	1.00541	1.03756	1.03681	1.00046	1.01947	1.00023	1.0087	1.04646		1.00872	0.00471157			1.07917	1.09482	1.12106	1.01719	1.03094	1.06402	1.02712	1.02924	1.02539	1.12784	1.07948	1.18566		1.0735	0.0150285		1.017	0.995073	1.01493	0.998346	1.01633	1.01518	0.997719	1.03035	1.00094	1.00149	1.02957
3.69533	0.998196	1.00736	0.984124	1.01819	0.991446	0.985465	0.974908	0.998835	1.00309	1.03611	1.03244	0.99627	1.01826	0.997138	1.00977	1.04469		1.00602	0.00491204			1.07932	1.08629	1.12329	1.01978	1.03424	1.06698	1.02793	1.03395	1.02452	1.12887	1.08223	1.18668		1.07451	0.0148547		1.02418	0.998886	1.01407	0.999728	1.02072	1.0138	0.997098	1.02753	1.0061	1.00378	1.02982
3.70337	0.995025	1.00875	0.988306	1.01709	0.995232	0.988647	0.972396	0.999002	1.00591	1.03558	1.03851	0.996634	1.0187	1.0002	1.0046	1.04683		1.00696	0.00501163			1.08188	1.09524	1.12555	1.02093	1.03661	1.07177	1.02909	1.0304	1.02614	1.1302	1.08291	1.1851		1.07632	0.0148518		1.01917	0.994716	1.00838	0.999709	1.02075	1.01509	0.998301	1.02687	1.00267	1.00289	1.03118
3.7114	0.999383	1.00929	0.988538	1.02035	0.995039	0.986523	0.973793	0.99687	1.00398	1.03501	1.03996	0.995675	1.01914	0.996086	1.00748	1.05473		1.00762	0.00536103			1.08496	1.09056	1.12519	1.02214	1.03763	1.07185	1.02559	1.03355	1.02499	1.13159	1.08557	1.18596		1.07663	0.0149029		1.02051	0.995318	1.0097	0.99615	1.01592	1.01727	0.999132	1.03097	1.0047	1.00596	1.03044
3.71943	0.999389	1.0109	0.989785	1.02068	0.996942	0.993749	0.979767	1.00155	1.00075	1.03299	1.03632	0.999153	1.022	1.00017	1.00368	1.04635		1.00839	0.00458301			1.0847	1.0969	1.12732	1.02058	1.03726	1.07146	1.03322	1.03126	1.0296	1.13475	1.08984	1.18587		1.07856	0.0149142		1.02243	0.994636	1.01488	0.999729	1.01744	1.01517	0.999144	1.02688	1.00596	1.00612	1.03593
3.72747	1.0012	1.01105	0.986573	1.026	0.994542	0.990503	0.978963	1.00154	1.00576	1.03763	1.04284	1.0001	1.02072	0.996816	1.00775	1.04539		1.00921	0.00501293			1.08708	1.09808	1.12919	1.02149	1.03582	1.07265	1.03024	1.0331	1.02691	1.1352	1.09122	1.19129		1.07936	0.0153921		1.02514	0.994676	1.01619	1.005	1.02243	1.01644	0.996451	1.0293	1.00294	1.00502	1.03127
3.7355	1.00049	1.00983	0.98844	1.0244	0.987149	0.986611	0.971298	0.998191	1.0047	1.04119	1.03621	0.999396	1.01911	0.999591	1.00239	1.04231		1.00696	0.00516956			1.08509	1.096	1.13116	1.02348	1.04257	1.08106	1.03105	1.03377	1.02861	1.13781	1.0916	1.18741		1.0808	0.0149938		1.02601	0.994032	1.01316	0.997281	1.02165	1.01421	0.997314	1.03216	1.00695	1.0076	1.03497
3.74353	1.00352	1.01625	0.993709	1.02761	0.992386	0.9829	0.976885	0.999148	1.00054	1.03761	1.03953	0.996564	1.01889	0.995784	1.00882	1.04147		1.00823	0.00501768			1.09061	1.09947	1.13267	1.02646	1.04117	1.06891	1.03033	1.04149	1.02892	1.13627	1.09127	1.18938		1.08141	0.0149635		1.02411	0.996502	1.01475	1.00022	1.01996	1.01688	0.998217	1.02844	1.00013	1.00546	1.03024
3.75157	0.998862	1.01156	0.989563	1.02335	0.991244	0.985488	0.975718	0.999518	1.00609	1.03676	1.03932	0.995004	1.01871	0.997063	1.00471	1.04485		1.00736	0.00506218			1.09132	1.10222	1.13367	1.02564	1.04164	1.0744	1.02859	1.0328	1.02848	1.14037	1.09555	1.19423		1.08241	0.0156559		1.02118	0.993621	1.01056	0.999381	1.02114	1.01564	0.995807	1.02649	1.00679	1.00367	1.03134
3.7596	0.999621	1.01504	0.994347	1.02339	0.994784	0.984278	0.978139	1.00114	1.0031	1.04161	1.0375	0.99958	1.02142	1.00104	1.0016	1.03992		1.00853	0.00482965			1.09143	1.09743	1.13427	1.02517	1.04132	1.07422	1.03434	1.03905	1.02861	1.13807	1.09765	1.19418		1.08298	0.0153078		1.02214	0.995892	1.01254	0.999382	1.01969	1.01412	0.995587	1.03018	1.00662	1.00369	1.03469
3.76763	1.00127	1.0097	0.992766	1.02436	0.993644	0.987882	0.980466	1.00152	1.00463	1.03862	1.04085	1.00186	1.02114	0.998785	1.00662	1.04614		1.00939	0.00487661			1.08935	1.10377	1.13646	1.02581	1.04049	1.07625	1.03042	1.04193	1.02907	1.1404	1.09685	1.19304		1.08365	0.0154241		1.02611	0.994627	1.01404	1.00337	1.02214	1.01274	0.995908	1.02696	1.00354	1.00529	1.03286
3.77567	1.00252	1.00977	0.987943	1.01875	0.993564	0.985072	0.974952	1.00115	1.00427	1.03783	1.03649	0.995902	1.01837	0.999589	1.01125	1.05022		1.00798	0.00510628			1.09716	1.10613	1.13907	1.02664	1.04206	1.07339	1.0319	1.03835	1.02749	1.1403	1.10124	1.19178		1.08463	0.0155518		1.02551	0.996056	1.01251	0.997533	1.02405	1.01826	0.997305	1.03138	1.00683	1.00897	1.03492
3.7837	0.999981	1.01174	0.989617	1.02452	0.990191	0.984253	0.976965	1.00189	1.00619	1.03925	1.03852	0.996749	1.02	1.00353	1.00623	1.04813		1.00861	0.0051558			1.09654	1.10945	1.14184	1.02968	1.04231	1.07918	1.03074	1.03928	1.0299	1.1439	1.09947	1.19929		1.0868	0.0159668		1.02385	0.992378	1.00844	0.995392	1.02031	1.01484	0.996855	1.03045	1.00038	1.00742	1.03541
3.79173	1.00274	1.00946	0.988716	1.02239	0.990233	0.984945	0.976424	0.997923	1.00393	1.04288	1.0406	0.999131	1.02232	1.00253	1.00199	1.04536		1.00822	0.00524216			1.09511	1.10543	1.14122	1.03065	1.04685	1.08814	1.0334	1.03494	1.03224	1.14444	1.10155	1.1974		1.08761	0.0156693		1.02639	0.996745	1.01062	0.996551	1.01991	1.02032	0.99893	1.03506	1.00488	1.00501	1.0334
3.79977	1.00263	1.01273	0.993191	1.02475	0.995949	0.985893	0.983395	1.00232	1.00218	1.03962	1.03979	0.993055	1.01975	1.00131	1.00294	1.04697		1.00916	0.00491436			1.09637	1.10285	1.14479	1.03064	1.0434	1.08326	1.03384	1.03913	1.03045	1.14425	1.10482	1.20017		1.08783	0.015926		1.02547	0.993452	1.01527	0.999362	1.02321	1.01877	0.998292	1.03331	1.0068	1.00627	1.0364
3.8078	1.00451	1.01146	0.989614	1.02701	0.995654	0.988357	0.982657	1.00142	1.00488	1.04123	1.0346	0.996171	1.01966	1.00165	1.00091	1.04813		1.00924	0.00488216			1.09594	1.10676	1.14759	1.0331	1.04548	1.08493	1.03271	1.04358	1.03158	1.14918	1.10387	1.20064		1.08961	0.0159694		1.02488	0.988579	1.01245	0.997524	1.01862	1.02012	0.995249	1.03053	1.00578	1.00226	1.03476
3.81583	1.00193	1.0092	0.989255	1.02543	0.995511	0.98851	0.981206	1.0016	1.00571	1.04106	1.04323	1.00003	1.02275	0.998578	1.00303	1.04984		1.0098	0.00517226			1.10112	1.10854	1.1444	1.03105	1.044	1.08237	1.03053	1.03649	1.0329	1.14922	1.10759	1.20593		1.08951	0.0165117		1.02472	0.994611	1.012	0.996907	1.01978	1.01865	0.996721	1.03093	1.00526	1.00195	1.03155
3.82387	1.00301	1.01343	0.989293	1.02461	0.990121	0.984958	0.981271	1.00111	1.00766	1.04544	1.04026	0.996235	1.01983	1.00044	1.00222	1.04952		1.00934	0.00532278			1.10229	1.10899	1.14713	1.03125	1.04612	1.08565	1.03852	1.04228	1.03392	1.14911	1.10772	1.20187		1.09124	0.0159422		1.02654	0.991623	1.01555	1.00138	1.02458	1.02035	0.997959	1.03203	1.00568	1.0042	1.03467
3.8319	0.999963	1.00888	0.99005	1.02593	0.993081	0.987366	0.979372	1.00162	1.00602	1.04225	1.04618	0.998892	1.02431	1.00242	1.0037	1.04644		1.00978	0.00527492			1.10255	1.10437	1.15373	1.03195	1.04476	1.0804	1.03377	1.03943	1.03349	1.14868	1.1128	1.20489		1.0909	0.0165143		1.02542	0.990889	1.01473	0.999239	1.02423	1.02064	0.99492	1.03377	1.00509	1.00457	1.03398
3.83993	1.00217	1.00655	0.986983	1.02317	0.990683	0.991162	0.977995	1.00118	1.00696	1.04273	1.04066	0.998513	1.02047	0.999624	1.00765	1.05312		1.00935	0.00533634			1.10505	1.10923	1.15342	1.0311	1.04886	1.08725	1.03986	1.04305	1.03264	1.14991	1.11129	1.20326		1.09291	0.016182		1.02984	0.991124	1.01472	1.00013	1.02222	1.01925	0.99702	1.03388	1.00596	1.00561	1.03544
3.84797	1.00248	1.00984	0.986544	1.02481	0.990216	0.989517	0.979478	0.999781	1.00458	1.04021	1.04424	1.00248	1.02323	1.00113	1.00648	1.05821		1.0102	0.00556556			1.10563	1.11151	1.15548	1.03227	1.04726	1.08651	1.03755	1.04297	1.03417	1.15152	1.11261	1.20599		1.09362	0.0164775		1.0259	0.994064	1.01411	0.999594	1.02381	1.01756	0.995165	1.03573	1.00272	1.00499	1.03706
3.856	1.00093	1.00947	0.987365	1.02387	0.991462	0.987305	0.979688	1.0011	1.0027	1.04068	1.04565	1.00093	1.0218	1.00102	0.998915	1.04786		1.0088	0.00530118			1.10686	1.10974	1.15603	1.03493	1.04909	1.08676	1.03135	1.04472	1.03502	1.15155	1.11654	1.2077		1.09419	0.0166057		1.02676	0.993156	1.01495	1.00241	1.02312	1.01896	0.999696	1.03637	1.00636	1.00778	1.03927
3.86403	1.00396	1.01107	0.986444	1.02508	0.991636	0.987183	0.975751	0.998598	1.0043	1.04486	1.0467	1.00161	1.02141	1.00322	1.00531	1.05275		1.00999	0.00565362			1.10413	1.10744	1.15902	1.03513	1.04985	1.09308	1.03155	1.04098	1.03511	1.15328	1.11679	1.20836		1.09456	0.0167901		1.0287	0.995412	1.01699	1.0005	1.02553	1.01726	0.997694	1.03288	1.0035	1.00974	1.03631
3.87207	1.00468	1.0114	0.987152	1.02744	0.995004	0.992683	0.984657	1.0017	1.00663	1.04453	1.04834	0.994522	1.02353	1.00223	1.00612	1.05601		1.01167	0.00552903			1.10734	1.10957	1.16264	1.03556	1.05306	1.08711	1.03733	1.04417	1.03725	1.152	1.11981	1.20765		1.09613	0.0165321		1.02957	0.994566	1.01871	1.00085	1.02502	1.02328	0.999806	1.03648	1.00144	1.00545	1.03709
3.8801	1.00268	1.0103	0.983012	1.02165	0.991573	0.988815	0.98246	1.00241	1.00305	1.04449	1.0406	0.99713	1.0228	1.00347	1.00903	1.05536		1.00993	0.00544947			1.10887	1.11336	1.1604	1.03609	1.05044	1.08801	1.03771	1.04438	1.03848	1.15085	1.11935	1.20972		1.09647	0.0165599		1.02806	0.995651	1.01813	0.998429	1.02419	1.01667	0.998	1.03837	1.00704	1.00722	1.04132
3.88813	1.00488	1.01113	0.983824	1.02231	0.993348	0.988442	0.982618	1.00116	1.00562	1.04602	1.04152	0.998366	1.02196	1.00407	1.0109	1.05706		1.01083	0.00550103			1.11155	1.11264	1.16048	1.03978	1.04824	1.08682	1.037	1.0502	1.03587	1.15442	1.12327	1.21313		1.09778	0.0167951		1.02812	0.99419	1.01702	1.00118	1.0277	1.0194	0.996839	1.04002	1.00249	1.00988	1.03844
3.89617	0.999936	1.00861	0.981816	1.02199	0.993828	0.991778	0.981914	1.00205	1.00429	1.04405	1.0495	1.00028	1.02442	1.00075	1.00855	1.05644		1.01064	0.00569357			1.11415	1.11478	1.16592	1.03507	1.05193	1.09432	1.03559	1.05039	1.03515	1.15396	1.12472	1.20923		1.09877	0.0168714		1.02688	0.996522	1.01598	0.998437	1.02308	1.02006	1.00003	1.03854	1.01014	1.00951	1.0439
3.9042	1.0056	1.01454	0.988049	1.02748	0.989442	0.99154	0.98156	1.00174	1.00543	1.04599	1.04719	1.00179	1.02531	1.00198	1.00458	1.05538		1.01173	0.00561783			1.11583	1.11894	1.16492	1.03673	1.05631	1.09437	1.0357	1.04726	1.0388	1.15321	1.12723	1.21469		1.10033	0.0170009		1.03147	0.997751	1.0172	1.00476	1.02807	1.01746	1.00086	1.04302	1.011	1.00846	1.04111
3.91223	1.00677	1.01474	0.986208	1.02616	0.997095	0.997581	0.986484	1.00379	1.00557	1.04437	1.05062	0.999287	1.02169	1.00434	1.00711	1.05177		1.01272	0.00522055			1.11308	1.11992	1.17067	1.03744	1.05473	1.0977	1.03569	1.04675	1.0372	1.15619	1.12673	1.21214		1.10069	0.0171636		1.03238	0.994733	1.01833	1.00366	1.02738	1.02103	1.00282	1.0416	1.00448	1.00958	1.04216
3.92027	1.00627	1.01326	0.985595	1.03042	0.989288	0.986102	0.980566	1.00074	1.00358	1.04522	1.04485	0.999187	1.02658	1.00138	1.01013	1.05894		1.01138	0.00588627			1.11678	1.11799	1.17227	1.03935	1.0579	1.09721	1.03669	1.0458	1.03996	1.15751	1.1271	1.21457		1.10193	0.0171797		1.03316	0.997517	1.02038	1.00081	1.02854	1.02043	0.998209	1.04481	1.0071	1.00719	1.04
3.9283	1.00671	1.01357	0.981163	1.02879	0.99132	0.990955	0.986128	1.00218	1.00508	1.0476	1.04601	0.999953	1.02638	1.00342	1.00881	1.05411		1.01201	0.00562002			1.12033	1.119	1.17063	1.04165	1.05216	1.09212	1.03315	1.04502	1.04082	1.1571	1.13032	1.21447		1.1014	0.0173582		1.03079	0.994038	1.01953	0.99864	1.0248	1.0215	0.996445	1.04239	1.00544	1.00818	1.04466
3.93633	1.00395	1.00686	0.981832	1.02656	0.990487	0.990702	0.984051	1.00185	1.00667	1.04641	1.04564	0.998147	1.02685	1.00192	1.00905	1.05675		1.01111	0.00572663			1.12246	1.11572	1.17469	1.03834	1.05585	1.10065	1.03295	1.05437	1.04175	1.15803	1.12938	1.21831		1.10354	0.0174359		1.03301	0.99575	1.01883	1.00129	1.02572	1.02067	1.00069	1.04042	1.01006	1.0104	1.0416
3.94437	1.00763	1.01175	0.982067	1.02901	0.991205	0.990117	0.979633	1.00205	1.00474	1.04632	1.04102	0.999111	1.02278	1.00362	1.00981	1.05454		1.01096	0.00558456			1.12272	1.11879	1.17654	1.04339	1.05432	1.09602	1.03712	1.05176	1.0417	1.15723	1.13361	1.21875		1.10433	0.0174069		1.03119	0.995775	1.0185	1.00426	1.02821	1.02203	0.999454	1.0422	1.00832	1.00888	1.04257
3.9524	1.00628	1.01047	0.98512	1.02592	0.988089	0.988073	0.982567	1.00195	1.00602	1.04839	1.0441	1.00178	1.02425	1.00362	1.01153	1.05863		1.01167	0.00575581			1.12711	1.1212	1.17976	1.04358	1.05929	1.09638	1.03436	1.05523	1.03684	1.15797	1.13105	1.21914		1.10516	0.0176032		1.02985	0.996546	1.01803	0.999862	1.02733	1.01856	1.0005	1.0428	1.00591	1.01022	1.04423
3.96043	1.00504	1.01081	0.98284	1.03033	0.993019	0.991455	0.985993	1.00292	1.00441	1.04601	1.04725	0.99922	1.02456	0.999376	1.00676	1.05929		1.01183	0.00576538			1.12295	1.12242	1.17856	1.04282	1.06127	1.1038	1.03584	1.05322	1.04219	1.15976	1.13433	1.22338		1.10671	0.0176376		1.02969	0.993348	1.01985	0.999955	1.02665	1.0189	0.997755	1.04043	1.00766	1.013	1.04383
3.96847	1.00882	1.0093	0.983529	1.03053	0.996061	0.991402	0.992756	1.00422	1.00733	1.05055	1.04787	1.00311	1.0263	1.00321	1.00695	1.05641		1.01365	0.00554915			1.12578	1.12289	1.18167	1.04568	1.06719	1.10735	1.03392	1.05367	1.04394	1.16189	1.13458	1.21927		1.10815	0.0174186		1.03257	0.995587	1.01953	1.00206	1.02926	1.01774	0.996466	1.04227	1.00945	1.00744	1.04439
3.9765	1.00836	1.01445	0.985458	1.03044	0.989828	0.989075	0.985414	1.0004	1.0046	1.04861	1.04288	0.996299	1.02588	1.00222	1.00553	1.05957		1.01181	0.00581269			1.126	1.12747	1.1833	1.04681	1.0653	1.10677	1.03698	1.05156	1.04742	1.16067	1.13717	1.22103		1.10921	0.0174564		1.03299	0.997316	1.02034	0.99966	1.02872	1.02034	1.00042	1.04343	1.00946	1.01189	1.04221
3.98453	1.00937	1.0133	0.987442	1.03104	0.991326	0.988198	0.983618	1.00288	1.00519	1.04875	1.0503	0.999037	1.02584	1.00296	1.00769	1.05596		1.01268	0.00581139			1.1299	1.12013	1.18626	1.04496	1.06591	1.10436	1.03099	1.05757	1.04742	1.16237	1.14091	1.22272		1.10946	0.0178016		1.03052	0.997694	1.01534	0.997274	1.02551	1.02156	1.00037	1.04284	1.00747	1.00695	1.04497
3.99257	1.00652	1.01312	0.984696	1.02874	0.993199	0.98666	0.980914	1.00458	1.01029	1.05227	1.04297	0.99697	1.02579	1.00668	1.00788	1.05244		1.01211	0.00568416			1.13116	1.12812	1.18782	1.04583	1.06567	1.11113	1.03628	1.05086	1.04633	1.16134	1.13765	1.21989		1.11017	0.0177053		1.03422	0.994282	1.01907	1.00157	1.02965	1.02431	1.00186	1.04502	1.00719	1.01096	1.04442
4.0006	1.00954	1.01405	0.986186	1.02674	0.998688	0.994272	0.983207	1.00494	1.00201	1.04625	1.04702	0.997696	1.02476	1.00549	1.00779	1.06019		1.01305	0.00558844			1.13037	1.12392	1.18895	1.05082	1.06581	1.10458	1.03592	1.05588	1.04658	1.16149	1.13913	1.21858		1.11017	0.0174194		1.03479	0.998034	1.02214	1.00228	1.0302	1.02628	0.999675	1.04488	1.00729	1.00772	1.04464
4.00863	1.0082	1.01136	0.984397	1.02619	0.991288	0.984791	0.986125	1.0041	1.00628	1.05051	1.0481	0.99908	1.02198	1.00679	1.01122	1.06447		1.01281	0.00603319			1.13122	1.12159	1.19175	1.05023	1.06691	1.11165	1.04044	1.06029	1.04436	1.16377	1.14252	1.22257		1.11227	0.0175977		1.03266	0.995965	1.01817	0.998681	1.03047	1.02271	1.00123	1.04279	1.00828	1.00876	1.04561
4.01667	1.00548	1.01483	0.987692	1.02982	0.994359	0.989793	0.983769	0.999945	1.00323	1.04821	1.04817	0.996445	1.02578	1.00414	1.01445	1.0668		1.01331	0.00608172			1.13375	1.12147	1.19373	1.04737	1.06606	1.11701	1.03642	1.06015	1.04954	1.16784	1.14636	1.22583		1.11379	0.0180647		1.02869	0.995375	1.02074	0.998655	1.02677	1.02488	0.999443	1.04618	1.00692	1.01354	1.04738
4.0247	1.00831	1.01269	0.984732	1.03227	0.992793	0.98822	0.984855	1.00211	1.00585	1.05218	1.04633	0.996793	1.02663	1.00499	1.01071	1.05955		1.01306	0.00595383			1.13243	1.12892	1.19605	1.04915	1.07115	1.11633	1.0385	1.05818	1.0505	1.16344	1.1448	1.22413		1.11447	0.0177758		1.03128	0.998904	1.01951	0.998784	1.02971	1.02334	0.999774	1.04565	1.01165	1.00889	1.049
4.03273	1.00701	1.01378	0.989175	1.02943	0.996261	0.989583	0.982285	1.00438	1.00596	1.05034	1.04993	1.00468	1.03095	1.00666	1.00684	1.06283		1.01438	0.00593366			1.13738	1.13221	1.19819	1.04867	1.06974	1.11695	1.03872	1.05761	1.0513	1.1656	1.14474	1.22534		1.11554	0.0180393		1.03326	0.998179	1.02118	1.00198	1.03201	1.01972	0.997685	1.04585	1.00689	1.0118	1.04637
4.04077	1.00661	1.01544	0.98507	1.03303	0.995877	0.989109	0.986654	1.00227	1.00569	1.05148	1.0492	1.00022	1.02839	1.00785	1.00551	1.06093		1.01396	0.005955			1.13815	1.13157	1.19489	1.04945	1.07127	1.12115	1.03758	1.06094	1.04951	1.16641	1.14282	1.22683		1.11588	0.0179561		1.03764	0.998417	1.02338	1.00345	1.0329	1.02405	0.998625	1.04448	1.01081	1.0083	1.04674
4.0488	1.00805	1.01492	0.983881	1.03416	0.998541	0.989826	0.988783	1.00342	1.00387	1.0477	1.04852	1.00275	1.0292	1.00608	1.00781	1.06033		1.01424	0.00575755			1.13922	1.12575	1.19822	1.05162	1.0733	1.1171	1.03391	1.05971	1.05544	1.1704	1.15094	1.22916		1.11706	0.0182385		1.03561	0.997518	1.02253	0.998397	1.0314	1.02286	0.998163	1.04571	1.00964	1.00784	1.04621
4.05683	1.00762	1.01402	0.98347	1.03087	0.993414	0.98785	0.980973	1.00273	1.011	1.0527	1.05476	1.00006	1.02695	1.0074	1.00798	1.06956		1.01446	0.00654332			1.14115	1.12851	1.19897	1.0528	1.07147	1.11329	1.03679	1.06484	1.05324	1.1661	1.14762	1.22351		1.11652	0.0177425		1.03722	0.99865	1.02302	1.00179	1.0318	1.02171	1.00109	1.0478	1.00889	1.01049	1.04741
4.06487	1.00657	1.01524	0.982349	1.02978	0.991355	0.98728	0.982515	1.00167	1.00779	1.05041	1.04953	1.00136	1.02755	1.00562	1.01549	1.06399		1.01366	0.00619706			1.14017	1.13641	1.20497	1.05095	1.07253	1.11025	1.0391	1.06384	1.05128	1.16701	1.1511	1.22933		1.11808	0.0183649		1.03903	0.997137	1.02163	0.999254	1.03126	1.01965	0.995809	1.04709	1.01131	1.01069	1.04852
4.0729	1.00179	1.01324	0.981094	1.03236	0.992525	0.987601	0.979404	1.00264	1.00968	1.05315	1.04751	0.997608	1.02894	1.00498	1.00948	1.06558		1.01297	0.00644357			1.14493	1.13027	1.20361	1.05143	1.07631	1.11351	1.04462	1.05921	1.05186	1.16923	1.1524	1.22855		1.11883	0.0181805		1.03852	0.997008	1.02158	1.00129	1.0311	1.02303	0.994058	1.0509	1.01046	1.01225	1.04928
4.08093	1.0064	1.01505	0.984517	1.03185	0.995357	0.988753	0.989056	1.00513	1.0085	1.05174	1.04758	0.993892	1.02702	1.0034	1.00919	1.06589		1.01396	0.00609545			1.1463	1.14067	1.2065	1.05351	1.07157	1.11483	1.03705	1.0655	1.05135	1.166	1.14951	1.22577		1.11905	0.0182827		1.03623	0.997261	1.02101	1.00008	1.03129	1.01619	0.997139	1.04551	1.00892	1.01116	1.05002
4.08897	1.00387	1.01394	0.986459	1.03054	0.992863	0.993494	0.982817	1.00269	1.00649	1.04868	1.0507	0.997959	1.0238	1.00798	1.00908	1.07145		1.01393	0.00626586			1.14543	1.1326	1.20835	1.05378	1.07659	1.11648	1.04144	1.06622	1.05231	1.16713	1.14692	1.22485		1.11934	0.0179377		1.0344	0.99261	1.02144	1.0008	1.0325	1.02056	0.998423	1.0459	1.00656	1.00888	1.04868
4.097	1.00863	1.01482	0.986355	1.03387	0.990688	0.986329	0.982006	1.00116	1.00567	1.05029	1.05017	0.994451	1.02702	1.00738	1.00876	1.0702		1.01361	0.00650665			1.14587	1.13387	1.20774	1.05464	1.07781	1.11535	1.03984	1.06996	1.0531	1.16761	1.14882	1.22643		1.12009	0.0179356		1.0358	0.994912	1.0217	0.997858	1.03112	1.02222	0.998561	1.04976	1.01127	1.01022	1.05017
4.10503	1.00357	1.01299	0.982333	1.03403	0.995239	0.990456	0.982263	1.00334	1.00884	1.05203	1.05397	1.00049	1.0293	1.00728	1.00843	1.06921		1.01461	0.0065019			1.14831	1.13465	1.21334	1.05752	1.07258	1.1169	1.04266	1.06727	1.05194	1.16643	1.14818	1.22717		1.12058	0.0181984		1.03575	0.994291	1.01957	0.998266	1.03089	1.01788	0.999456	1.05075	1.00781	1.00937	1.05047
4.11307	1.00184	1.01475	0.983456	1.03512	0.995249	0.98664	0.984482	1.0043	1.00479	1.05038	1.04521	0.999324	1.02851	1.00652	1.0127	1.07069		1.014	0.00634843			1.15128	1.13939	1.21483	1.05697	1.07716	1.11232	1.04111	1.06159	1.05636	1.16969	1.15298	1.23006		1.12198	0.0185703		1.03737	0.995483	1.0261	1.00066	1.03337	1.02323	0.998073	1.05564	1.01004	1.0097	1.05223
4.1211	1.00362	1.01618	0.979018	1.03187	0.998111	0.992818	0.988096	1.00309	1.00445	1.05131	1.05192	0.996931	1.02789	1.00633	1.00882	1.07076		1.01445	0.00640841			1.15167	1.13683	1.21435	1.05652	1.07919	1.1204	1.04397	1.06267	1.0549	1.16766	1.1531	1.2264		1.1223	0.0182193		1.03586	0.996841	1.02067	0.997478	1.03133	1.02002	0.999853	1.05347	1.01201	1.01359	1.05387
4.12913	1.00598	1.01631	0.980536	1.03722	0.991327	0.985122	0.983745	1.00178	1.00354	1.04944	1.04872	1.00155	1.02643	1.00632	1.01546	1.07183		1.01408	0.00659138			1.15504	1.1419	1.21874	1.0611	1.08309	1.11955	1.04058	1.06898	1.05935	1.17051	1.15354	1.22971		1.12517	0.018313		1.0353	0.996215	1.02059	0.999516	1.03395	1.02013	0.997763	1.05174	1.01065	1.01235	1.04931
4.13717	1.0076	1.0178	0.982032	1.03197	0.990219	0.986807	0.98159	1.00209	1.00344	1.05268	1.05265	1.00059	1.03206	1.007	1.01485	1.0741		1.01484	0.00681765			1.15419	1.13639	1.22036	1.06055	1.0814	1.11712	1.04367	1.06667	1.05611	1.17039	1.15704	1.22886		1.1244	0.0184277		1.03666	0.996095	1.0242	1.00246	1.03341	1.02099	0.996963	1.05838	1.01543	1.01534	1.05366
4.1452	1.00486	1.01621	0.979482	1.03083	0.997196	0.98931	0.986205	1.00486	1.00327	1.05501	1.05166	1.00207	1.03218	1.0099	1.01203	1.0729		1.0155	0.00659972			1.15419	1.13561	1.22216	1.06172	1.08333	1.12266	1.04187	1.06588	1.05714	1.1693	1.15212	1.23245		1.12487	0.0185467		1.03604	0.999398	1.02658	1.00327	1.03512	1.02301	0.999053	1.05696	1.01495	1.01834	1.05466
4.15323	1.0048	1.01719	0.980372	1.03285	0.996327	0.989575	0.990267	1.00389	1.00506	1.04985	1.05099	0.998181	1.03144	1.00696	1.01016	1.07148		1.01496	0.00638909			1.15627	1.14042	1.22325	1.06058	1.08564	1.12542	1.04889	1.07106	1.05732	1.17255	1.15669	1.23169		1.12748	0.0183451		1.03598	0.99735	1.02603	1.00368	1.03559	1.0219	1.0004	1.05455	1.01213	1.01475	1.05589
4.16127	1.0098	1.0191	0.98296	1.03676	0.992801	0.984983	0.984765	1.00179	1.00602	1.05513	1.05019	0.998473	1.02959	1.0068	1.0115	1.07656		1.01545	0.00686434			1.15744	1.13647	1.22642	1.06224	1.08173	1.1213	1.04455	1.07103	1.05547	1.1709	1.15852	1.22933		1.12628	0.0185882		1.03523	0.997914	1.02596	1.00229	1.03611	1.02009	0.997943	1.05312	1.01204	1.01427	1.05287
4.1693	1.0056	1.0179	0.983482	1.03077	0.987676	0.981036	0.979571	0.999887	1.00527	1.04855	1.0496	1.00036	1.0309	1.00726	1.01117	1.07316		1.01326	0.00677488			1.1586	1.14256	1.22719	1.06015	1.08447	1.12751	1.04108	1.06935	1.05885	1.17082	1.15918	1.23207		1.12765	0.0188492		1.03275	0.995381	1.02257	1.00061	1.03632	1.02174	0.998737	1.05939	1.01603	1.01348	1.05538
4.17733	1.00948	1.01593	0.980154	1.03337	0.993937	0.985698	0.984028	1.00178	1.00663	1.05154	1.05397	1.00367	1.03221	1.00587	1.01005	1.07397		1.01514	0.00675531			1.15951	1.14198	1.23268	1.06191	1.08332	1.12091	1.04481	1.07174	1.06229	1.17093	1.16212	1.2351		1.12894	0.0189561		1.03157	0.996169	1.02367	1.00319	1.03394	1.02265	0.998954	1.05656	1.01631	1.01318	1.05649
4.18537	1.0065	1.01625	0.981572	1.03426	0.99737	0.991298	0.989207	1.00369	1.00626	1.05078	1.05503	0.999829	1.02815	1.00946	1.01155	1.07066		1.01574	0.00636441			1.16095	1.14719	1.23339	1.06306	1.0873	1.12181	1.04407	1.06726	1.06018	1.17056	1.15838	1.2331		1.12894	0.018985		1.03687	0.999349	1.0275	1.00473	1.03709	1.01983	0.99847	1.05604	1.00941	1.01427	1.05817
4.1934	1.01014	1.01578	0.981779	1.03658	0.994882	0.986216	0.983979	1.00394	1.00762	1.05326	1.05415	0.996688	1.02605	1.00624	1.00723	1.06577		1.01439	0.00649651			1.16103	1.13942	1.23127	1.06557	1.08744	1.12179	1.04134	1.07772	1.05729	1.17172	1.16163	1.23107		1.12894	0.0187		1.03467	0.991592	1.02492	0.99996	1.03522	1.02321	0.99881	1.06124	1.01037	1.01745	1.0561
4.20143	1.00719	1.01897	0.982209	1.03517	0.996155	0.988035	0.98893	1.00273	1.00783	1.05201	1.05442	0.997505	1.03149	1.0058	1.01191	1.06819		1.01553	0.00643653			1.1647	1.1411	1.23909	1.06766	1.09238	1.12948	1.05646	1.07334	1.06264	1.17583	1.16153	1.23592		1.13334	0.0186407		1.0357	0.995514	1.02092	0.999627	1.03567	1.02076	0.997473	1.0644	1.01286	1.0141	1.05429
4.20947	1.00914	1.02005	0.983671	1.0385	0.993783	0.989026	0.980956	1.00293	1.00789	1.0493	1.05423	1.00084	1.02794	1.0077	1.00947	1.06511		1.01503	0.00637437			1.16374	1.14068	1.23591	1.06524	1.09268	1.12772	1.05329	1.07537	1.06244	1.17386	1.16328	1.23316		1.13228	0.018485		1.03264	0.99371	1.02611	1.00066	1.03916	1.0207	0.998285	1.05873	1.01083	1.01659	1.05635
4.2175	1.00656	1.01666	0.983505	1.03203	0.989865	0.985097	0.978654	1.00204	1.00469	1.05442	1.0558	1.0006	1.02913	1.00386	1.01099	1.07204		1.01412	0.00691732			1.16796	1.14385	1.23833	1.06653	1.08928	1.1322	1.05379	1.07119	1.06289	1.17203	1.16053	1.23404		1.13272	0.0187211		1.03653	0.997133	1.02876	1.00313	1.04032	1.02497	1.00046	1.05826	1.01291	1.00938	1.05635
4.22553	1.00951	1.02017	0.984725	1.03736	0.995056	0.983196	0.982211	1.00253	1.00675	1.05002	1.05606	0.997599	1.02547	1.00696	1.01178	1.06279		1.01451	0.00641006			1.16971	1.14859	1.23822	1.06586	1.09127	1.12355	1.0542	1.07569	1.0657	1.17594	1.1646	1.23308		1.13387	0.0186423		1.03238	0.995785	1.02411	1.00038	1.0368	1.02119	0.997709	1.06029	1.01513	1.01601	1.0555
4.23357	1.00578	1.01819	0.984685	1.03343	0.993272	0.984485	0.981079	1.00235	1.01088	1.05329	1.05588	0.998049	1.03013	1.01152	1.01174	1.06473		1.01497	0.00652991			1.16993	1.14602	1.24218	1.06741	1.08781	1.12743	1.05368	1.07174	1.06161	1.17467	1.16368	1.22964		1.13298	0.0188673		1.03481	0.993039	1.02333	1.00152	1.0364	1.02203	0.99907	1.05882	1.01128	1.01125	1.05807
4.2416	1.00907	1.01592	0.983377	1.03347	0.996081	0.985601	0.981966	1.00313	1.00512	1.05172	1.05244	1.00221	1.0302	1.00918	1.01451	1.07623		1.01564	0.00672399			1.16793	1.1414	1.24682	1.06887	1.08978	1.12399	1.05024	1.07668	1.0662	1.17597	1.16549	1.23763		1.13425	0.0191925		1.03541	0.995591	1.0263	1.00062	1.03818	1.02832	1.00149	1.06227	1.01212	1.01244	1.05448
4.24963	1.00699	1.01742	0.980951	1.03112	0.995685	0.982626	0.981822	1.00339	1.00847	1.05408	1.05244	0.99616	1.02898	1.00537	1.0109	1.06853		1.01406	0.00665447			1.17361	1.14288	1.246	1.06955	1.09191	1.12731	1.05543	1.07646	1.06799	1.1765	1.168	1.23688		1.13604	0.0189695		1.03598	0.999658	1.02558	1.00305	1.03855	1.02099	0.997669	1.06754	1.01423	1.01491	1.05988
4.25767	1.00853	1.0166	0.982144	1.03325	0.993879	0.9803	0.981657	1.00153	1.00858	1.05496	1.05691	1.00267	1.03007	1.00899	1.01632	1.06622		1.01516	0.00671925			1.17417	1.14642	1.2472	1.0685	1.09462	1.13116	1.05761	1.07829	1.06636	1.17336	1.16736	1.23334		1.13653	0.0187485		1.03144	0.992061	1.02545	0.999846	1.03669	1.02447	1.00106	1.06468	1.01381	1.0119	1.05495
4.2657	1.00676	1.01696	0.980932	1.03289	0.995989	0.986156	0.984469	1.00362	1.0071	1.05505	1.05488	1.00622	1.03096	1.00784	1.01357	1.0667		1.01563	0.00649221			1.17406	1.14787	1.25286	1.06871	1.09225	1.12865	1.05427	1.07458	1.06611	1.17606	1.16108	1.23588		1.13603	0.0193235		1.03245	0.997455	1.03	1.00193	1.04101	1.02418	0.999407	1.06787	1.01425	1.01613	1.05834
4.27373	1.0087	1.01918	0.979923	1.03819	0.992707	0.981433	0.980641	1.00181	1.00571	1.05257	1.05846	0.999931	1.03135	1.00888	1.01317	1.06828		1.01506	0.00694152			1.17352	1.15043	1.25196	1.06926	1.0965	1.12994	1.0585	1.08228	1.06696	1.17667	1.16593	1.23636		1.13819	0.0189371		1.03361	0.993105	1.03114	1.00442	1.03997	1.02322	1.00012	1.06624	1.01663	1.01819	1.05589
4.28177	1.0082	1.01807	0.983943	1.03652	0.998489	0.987177	0.988272	1.00409	1.00754	1.0517	1.05181	0.997949	1.02735	1.01068	1.01113	1.06468		1.01547	0.0061449			1.17421	1.14474	1.25581	1.06698	1.09264	1.12931	1.05451	1.08206	1.06658	1.17433	1.16498	1.23832		1.13704	0.0194067		1.03801	0.996766	1.03028	1.00333	1.04107	1.02216	0.998301	1.06761	1.01434	1.01736	1.05607
4.2898	1.00469	1.0146	0.980067	1.03511	0.991991	0.982448	0.982143	1.00447	1.00534	1.04963	1.06037	0.997505	1.03157	1.00398	1.0114	1.06995		1.01408	0.00694724			1.17736	1.14597	1.25683	1.06943	1.09284	1.13079	1.05754	1.078	1.06867	1.17648	1.1658	1.23627		1.138	0.0193291		1.03875	0.992826	1.02775	0.997983	1.04171	1.02376	0.999504	1.06462	1.01286	1.01362	1.05758
4.29783	1.00834	1.01947	0.982602	1.02999	0.991583	0.983703	0.98052	1.00443	1.00835	1.05295	1.05331	1.00201	1.03001	1.00903	1.01676	1.07419		1.01545	0.00678622			1.17967	1.14969	1.25714	1.07391	1.09742	1.13392	1.05996	1.07992	1.0649	1.17374	1.16262	1.23384		1.13889	0.0190102		1.03561	0.994447	1.03076	0.999922	1.04043	1.02238	0.997745	1.07182	1.01587	1.01488	1.05913
4.30587	1.00914	1.01353	0.98169	1.03523	1.00049	0.985461	0.986201	1.00728	1.00235	1.04959	1.05615	0.9987	1.02979	1.00847	1.02051	1.07393		1.01616	0.00664121			1.1791	1.14026	1.25617	1.07095	1.09461	1.13228	1.06278	1.0808	1.06877	1.17651	1.16825	1.23921		1.13914	0.0191523		1.03461	0.991016	1.02913	1.00116	1.03787	1.02363	1.0004	1.06938	1.01971	1.0134	1.06055
4.3139	1.0078	1.01869	0.980967	1.03355	0.995167	0.982876	0.979786	1.00267	1.00613	1.05347	1.05439	1.00104	1.02909	1.0066	1.01886	1.07251		1.01523	0.0068557			1.18192	1.15102	1.26025	1.07494	1.09764	1.13119	1.05934	1.07827	1.06875	1.17767	1.16553	1.23579		1.14019	0.0192834		1.03653	0.99323	1.0278	1.00132	1.03846	1.02593	1.00286	1.07103	1.0127	1.01475	1.05899
4.32193	1.00675	1.01846	0.981149	1.03329	0.993449	0.980738	0.983626	1.0052	1.00682	1.05294	1.05468	0.99878	1.02765	1.00731	1.01725	1.06732		1.01471	0.0066404			1.18512	1.14608	1.25939	1.07688	1.09443	1.12405	1.06567	1.08081	1.0703	1.17835	1.16922	1.2393		1.1408	0.019209		1.03624	0.991138	1.02825	0.998176	1.03727	1.02394	1.00433	1.07388	1.01528	1.01829	1.06356
4.32997	1.00659	1.01525	0.981811	1.03304	0.996288	0.983141	0.986938	1.00341	1.00665	1.053	1.05507	0.996052	1.027	1.00719	1.01608	1.0755		1.01519	0.00680963			1.18351	1.14707	1.26477	1.07058	1.10068	1.13331	1.06314	1.08384	1.07173	1.17884	1.17163	1.24066		1.14248	0.019503		1.03754	0.989998	1.02403	0.99764	1.03825	1.02303	1.00174	1.06922	1.01879	1.0172	1.06135
4.338	1.00801	1.01344	0.978429	1.03359	0.992326	0.977619	0.980286	1.00357	1.01167	1.05365	1.05545	0.998937	1.02822	1.00646	1.01851	1.07353		1.01461	0.00708987			1.18603	1.14887	1.26459	1.07523	1.10417	1.13677	1.06181	1.08343	1.0707	1.17855	1.16819	1.23905		1.14312	0.0193264		1.03236	0.986807	1.0268	1.00044	1.03709	1.02535	1.00258	1.07063	1.01848	1.02078	1.06453
4.34603	1.00983	1.01844	0.981881	1.03498	0.991331	0.981869	0.983266	1.00341	1.0044	1.05346	1.05355	0.99467	1.02987	1.00797	1.01805	1.06966		1.01479	0.00679824			1.18412	1.14618	1.26799	1.07519	1.10045	1.13478	1.06116	1.08284	1.06966	1.1803	1.16553	1.23517		1.14195	0.019438		1.03598	0.991901	1.02802	1.00085	1.03802	1.02437	1.00242	1.07095	1.01807	1.01645	1.0608
4.35407	1.01023	1.01722	0.980726	1.03272	0.993982	0.985218	0.981231	1.00499	1.00507	1.05005	1.05829	1.0001	1.02638	1.00717	1.01417	1.07787		1.01534	0.0069678			1.18631	1.14682	1.26797	1.07737	1.10251	1.12793	1.06679	1.08324	1.07238	1.1781	1.16951	1.23831		1.1431	0.0192798		1.03315	0.990682	1.02804	0.994298	1.03671	1.02356	1.00069	1.07097	1.01616	1.01409	1.06106
4.3621	1.00935	1.01761	0.980899	1.03229	0.996946	0.987328	0.98647	1.00379	1.00762	1.05018	1.05588	0.996864	1.02932	1.00935	1.01819	1.07428		1.01602	0.00663583			1.18955	1.15021	1.27244	1.07583	1.10369	1.1348	1.07307	1.08358	1.07221	1.17757	1.17161	1.24015		1.14539	0.0194455		1.0374	0.99567	1.0291	1.00004	1.04181	1.02195	0.999826	1.06864	1.01895	1.01388	1.05967
4.37013	1.00738	1.01704	0.982704	1.03263	1.00061	0.982548	0.986842	1.00786	1.00669	1.05242	1.06024	1.00009	1.03244	1.00995	1.01886	1.07257		1.01693	0.00672619			1.18773	1.14753	1.27122	1.0756	1.10342	1.1379	1.06764	1.08367	1.07392	1.18014	1.16935	1.244		1.14518	0.0196147		1.03859	0.995109	1.03383	0.997463	1.04251	1.02466	1.00003	1.07079	1.01587	1.01281	1.06003
4.37817	1.01182	1.01674	0.981125	1.03433	0.995746	0.980283	0.98645	1.00564	1.00806	1.05151	1.05795	0.999247	1.02836	1.00987	1.01962	1.07249		1.0162	0.00676865			1.18951	1.14559	1.27305	1.07837	1.10763	1.13733	1.06595	1.08222	1.07408	1.18287	1.17081	1.24477		1.14602	0.0197591		1.04163	0.993217	1.03172	1.00128	1.0432	1.02506	1.00011	1.07283	1.0168	1.01443	1.06082
4.3862	1.01201	1.01668	0.980389	1.03572	0.995904	0.981735	0.987542	1.00658	1.01113	1.05307	1.06231	0.99944	1.03241	1.01019	1.02096	1.07149		1.01735	0.00687496			1.19545	1.14903	1.27659	1.08004	1.10109	1.13189	1.067	1.08342	1.07054	1.18109	1.16689	1.23558		1.14488	0.0197722		1.03997	0.992447	1.03313	0.999497	1.04203	1.02539	1.00175	1.07209	1.01905	1.01583	1.06161
4.39423	1.01055	1.01502	0.982826	1.03429	0.991299	0.978613	0.985607	1.00325	1.00475	1.05005	1.0596	0.996427	1.03042	1.00724	1.01563	1.07026		1.01474	0.00687169			1.19315	1.15307	1.28041	1.08119	1.10373	1.13071	1.07125	1.08652	1.07434	1.17965	1.16767	1.23933		1.14675	0.0196803		1.04006	0.994428	1.02965	0.996749	1.04168	1.02559	0.997778	1.07322	1.01879	1.01326	1.06412
4.40227	1.00834	1.01907	0.982057	1.03492	0.994933	0.980612	0.988281	1.0047	1.00615	1.04898	1.05939	0.99593	1.02972	1.01147	1.02157	1.07306		1.0162	0.00681162			1.19564	1.15282	1.27681	1.08003	1.10166	1.13965	1.0643	1.08303	1.0765	1.17861	1.17344	1.23943		1.14683	0.0198459		1.03836	0.992634	1.03407	0.99949	1.04155	1.02429	0.999655	1.07929	1.02244	1.01519	1.06192
4.4103	1.01208	1.02122	0.981627	1.03972	0.991579	0.97944	0.980392	1.00247	1.00695	1.05377	1.05796	0.998277	1.02841	1.00948	1.0121	1.06744		1.01518	0.00695249			1.19478	1.15327	1.2819	1.0787	1.10531	1.13131	1.07021	1.08796	1.07475	1.18189	1.17474	1.24066		1.14796	0.0199469		1.03973	0.993017	1.03135	1.0009	1.03873	1.02397	1.00095	1.07539	1.017	1.01624	1.06195
4.41833	1.01322	1.01393	0.980279	1.03388	0.992312	0.979443	0.984585	1.00309	1.00815	1.05248	1.06225	0.998833	1.03215	1.01094	1.02165	1.07861		1.01661	0.0072795			1.19529	1.15413	1.28149	1.08135	1.10913	1.13691	1.071	1.08631	1.07369	1.18207	1.17075	1.24372		1.14882	0.0198971		1.03776	0.991289	1.03015	1.00111	1.04461	1.02338	0.999421	1.0713	1.01476	1.01502	1.06349
4.42637	1.01342	1.01872	0.984561	1.03503	0.988899	0.975699	0.983301	1.00427	1.0052	1.05048	1.05691	0.998693	1.03111	1.01146	1.02201	1.06854		1.01552	0.0068466			1.19665	1.15206	1.28527	1.07987	1.10768	1.14032	1.06985	1.08995	1.0735	1.18006	1.16858	1.238		1.14848	0.0198724		1.03965	0.997252	1.036	1.00063	1.0451	1.02569	0.999899	1.07644	1.01895	1.01672	1.06558
4.4344	1.0115	1.01834	0.980941	1.03365	0.990686	0.971745	0.986395	1.00296	1.00322	1.04992	1.0613	0.997564	1.03085	1.01019	1.01899	1.07272		1.01506	0.00718353			1.1974	1.15052	1.28682	1.08275	1.1104	1.13314	1.06902	1.08611	1.07439	1.17844	1.17176	1.24035		1.14843	0.0200598		1.04017	0.996285	1.03181	0.999639	1.0429	1.02596	1.00093	1.07909	1.01989	1.01487	1.06295
4.44243	1.01176	1.01753	0.984044	1.03661	0.990861	0.975835	0.986295	1.00165	1.00561	1.05283	1.06033	0.999183	1.03473	1.00846	1.0209	1.07429		1.01631	0.00717071			1.2007	1.15006	1.2861	1.08551	1.11126	1.13423	1.07165	1.08609	1.07986	1.1839	1.17378	1.24336		1.15054	0.0199567		1.03967	0.99613	1.03553	1.0015	1.04263	1.02492	1.00091	1.06967	1.0202	1.01468	1.06428
4.45047	1.00977	1.01561	0.979111	1.03676	0.996336	0.976374	0.986445	1.00576	1.00658	1.05301	1.06283	0.997371	1.03115	1.0098	1.01721	1.07083		1.01593	0.00708278			1.1989	1.15497	1.28836	1.08313	1.1081	1.13746	1.06986	1.08546	1.08081	1.18309	1.17816	1.24424		1.15105	0.02024		1.04015	0.995182	1.03447	1.00163	1.04443	1.02502	0.99892	1.07814	1.01877	1.01988	1.06298
4.4585	1.01002	1.01752	0.977644	1.03404	0.993704	0.975791	0.987607	1.00611	1.00993	1.05326	1.05969	0.996654	1.03327	1.01109	1.02084	1.07695		1.01651	0.00725054			1.20116	1.15405	1.29078	1.08311	1.11462	1.1423	1.07634	1.08921	1.07706	1.18151	1.17603	1.23889		1.15209	0.019886		1.04061	0.998327	1.03254	0.998824	1.04426	1.0259	0.998572	1.07496	1.01526	1.0136	1.06338
4.46653	1.01335	1.0192	0.98204	1.03573	0.989812	0.97323	0.983762	1.00263	1.00683	1.04866	1.06019	0.992942	1.03092	1.01155	1.0205	1.08109		1.01578	0.00747982			1.20532	1.15381	1.29037	1.08512	1.11398	1.14057	1.07527	1.09052	1.07901	1.185	1.17712	1.24475		1.1534	0.0201013		1.03785	0.994269	1.03547	0.998891	1.04193	1.025	1.00193	1.07876	1.02101	1.01939	1.0644
4.47457	1.01292	1.01955	0.982398	1.03814	0.992649	0.974928	0.988465	1.00401	1.01153	1.04922	1.06063	0.998758	1.03078	1.01118	1.01704	1.07715		1.01683	0.00711778			1.19948	1.14917	1.29608	1.08684	1.11164	1.14268	1.07705	1.09312	1.07828	1.18078	1.17312	1.24213		1.15253	0.0200184		1.04166	0.995718	1.03353	0.998672	1.03892	1.02667	0.999367	1.07869	1.02164	1.01337	1.06193
4.4826	1.01157	1.01599	0.982503	1.03591	0.994996	0.976339	0.988057	1.00336	1.00604	1.04838	1.05793	0.996289	1.0298	1.01331	1.02148	1.07961		1.01635	0.00708838			1.20619	1.15436	1.29444	1.08158	1.10969	1.13525	1.07391	1.09449	1.07816	1.18407	1.1766	1.24106		1.15248	0.020353		1.04098	0.99723	1.03495	0.998419	1.04745	1.02711	0.999467	1.07537	1.02171	1.01698	1.06413
4.49063	1.01094	1.01496	0.982282	1.03311	0.991907	0.975913	0.98713	1.00389	1.00773	1.05013	1.06319	0.998967	1.03336	1.01117	1.0175	1.07481		1.01606	0.00711807			1.20631	1.14961	1.29699	1.08599	1.11284	1.13715	1.07857	1.08719	1.0826	1.18584	1.17338	1.24277		1.15327	0.0202858		1.03754	0.996582	1.03445	0.997614	1.04084	1.02496	0.998611	1.08285	1.02448	1.02048	1.06862
4.49867	1.01278	1.02108	0.986352	1.03484	0.993193	0.976836	0.987171	1.00373	1.0081	1.05358	1.06357	0.998359	1.03056	1.01285	1.02303	1.07372		1.01748	0.00704812			1.20568	1.15573	1.29507	1.08495	1.11565	1.14195	1.07381	1.09479	1.07757	1.18195	1.17264	1.23557		1.15295	0.0199439		1.04151	0.999699	1.03648	1.0004	1.04442	1.0273	0.998181	1.07772	1.01981	1.01575	1.06547
4.5067	1.01482	1.0169	0.982348	1.03491	0.993355	0.974693	0.985998	1.00299	1.00381	1.04563	1.06088	0.995043	1.03233	1.00951	1.02253	1.08399		1.01623	0.00742563			1.21107	1.15591	1.2994	1.0874	1.11177	1.13749	1.07476	1.09523	1.08228	1.18335	1.17548	1.24041		1.15455	0.0203299		1.04257	0.995264	1.03971	1.00227	1.04671	1.02483	0.996959	1.08112	1.02343	1.01898	1.06663
4.51473	1.01088	1.0141	0.985796	1.03267	0.995873	0.981715	0.991615	1.00463	1.00449	1.04786	1.05984	0.992331	1.02808	1.01157	1.01845	1.07935		1.0162	0.00687329			1.20762	1.15157	1.30375	1.08524	1.11757	1.14281	1.07551	1.08996	1.07934	1.18091	1.17083	1.24081		1.15383	0.0205723		1.0428	0.997457	1.03627	0.998073	1.04551	1.02481	1.00023	1.08389	1.02273	1.01796	1.06754
4.52277	1.01147	1.01961	0.984484	1.03991	0.994932	0.974148	0.990756	1.00457	1.00636	1.04749	1.05974	0.999062	1.03233	1.01042	1.01545	1.08077		1.01697	0.00716622			1.20653	1.15503	1.30425	1.08416	1.11691	1.14291	1.08421	1.09222	1.08109	1.18436	1.17375	1.2395		1.15541	0.0202848		1.04047	0.996212	1.03574	0.995458	1.04314	1.02418	0.999785	1.079	1.01709	1.01494	1.06268
4.5308	1.0098	1.01992	0.984837	1.03493	0.989006	0.969372	0.985087	1.00323	1.00899	1.04782	1.06058	0.995245	1.03004	1.01101	1.01729	1.07882		1.01537	0.00737356			1.21159	1.15346	1.30183	1.0858	1.1146	1.14282	1.07871	1.08949	1.08317	1.18489	1.17638	1.24392		1.15556	0.0205708		1.04195	0.997111	1.03793	0.998458	1.04288	1.02743	1.00023	1.07908	1.02156	1.01856	1.06648
4.53883	1.0098	1.01872	0.981912	1.03798	0.987613	0.971655	0.984534	1.00222	1.00926	1.05139	1.0601	0.992858	1.03002	1.01401	1.02126	1.07571		1.01557	0.00741958			1.21028	1.14983	1.30092	1.08948	1.10832	1.13874	1.08158	1.09479	1.08388	1.18619	1.17461	1.24133		1.155	0.0202248		1.04398	0.996197	1.03726	1.00094	1.04574	1.02684	0.998826	1.07916	1.01654	1.01244	1.06649
4.54687	1.01062	1.01764	0.981052	1.03398	0.983398	0.968862	0.983906	1.00273	1.00937	1.05167	1.06374	0.996955	1.0321	1.01065	1.01934	1.08635		1.01577	0.00797736			1.21247	1.15874	1.30838	1.08849	1.11367	1.14965	1.08449	1.09197	1.08163	1.18647	1.18032	1.25022		1.15888	0.0209343		1.04193	0.995498	1.0386	0.999995	1.04386	1.02695	0.999545	1.08483	1.02081	1.01748	1.06682
4.5549	1.01015	1.01993	0.980791	1.03261	0.986421	0.972553	0.987372	1.00591	1.01089	1.05192	1.0647	0.994796	1.03049	1.0101	1.02422	1.08136		1.01651	0.00762872			1.21284	1.14876	1.30704	1.08775	1.11414	1.15078	1.08321	1.09446	1.08194	1.18519	1.17296	1.24412		1.15693	0.0205967		1.04342	0.997198	1.04152	1.00015	1.04759	1.02466	0.998793	1.08517	1.02361	1.01899	1.07098
4.56293	1.01364	1.01854	0.984044	1.03535	0.986821	0.97349	0.985005	1.00284	1.0087	1.04812	1.06273	0.992487	1.02486	1.00968	1.01947	1.08529		1.01569	0.00762448			1.21407	1.15594	1.30997	1.0885	1.12058	1.1524	1.08237	1.08714	1.08278	1.1882	1.17523	1.24264		1.15832	0.0208303		1.0403	0.998055	1.0377	0.996532	1.0436	1.02557	0.997268	1.08461	1.02246	1.01641	1.06851
4.57097	1.01178	1.02009	0.981824	1.03945	0.991447	0.974333	0.989406	1.00429	1.01078	1.04987	1.06422	0.991056	1.02593	1.01029	1.02109	1.08013		1.01662	0.00744982			1.21688	1.15658	1.31134	1.08934	1.11267	1.14754	1.0801	1.09462	1.08246	1.1841	1.1734	1.24002		1.15742	0.0208333		1.03607	0.993714	1.0365	0.996027	1.04631	1.02514	0.998145	1.08754	1.02152	1.01739	1.06767
4.579	1.01208	1.01756	0.978792	1.03375	0.986703	0.969522	0.985002	1.00257	1.00774	1.04566	1.06694	0.998881	1.03066	1.01181	1.02454	1.08192		1.01588	0.00773621			1.21564	1.16069	1.30975	1.08987	1.1186	1.1476	1.08351	1.09655	1.08444	1.18573	1.17797	1.24187		1.15935	0.020519		1.03724	0.992673	1.0359	0.998661	1.04402	1.02517	1.00078	1.08712	1.02558	1.01842	1.0694
4.58703	1.01263	1.01473	0.979409	1.03555	0.990159	0.971821	0.983977	1.00361	1.00913	1.04817	1.06129	0.994276	1.02731	1.01456	1.0177	1.08069		1.01531	0.00748537			1.21788	1.1573	1.31604	1.08851	1.11757	1.14894	1.0825	1.09102	1.08173	1.18343	1.17601	1.24181		1.15856	0.0211606		1.03916	0.99576	1.04001	1.00027	1.04646	1.02384	0.995873	1.08262	1.02301	1.01817	1.06918
4.59507	1.00938	1.02047	0.980408	1.03722	0.98605	0.970364	0.983967	1.00372	1.0087	1.05075	1.06697	0.996566	1.03252	1.01604	1.02528	1.08073		1.01682	0.00782964			1.22053	1.15715	1.31506	1.09031	1.11793	1.14605	1.08773	1.09714	1.08283	1.18283	1.17654	1.24771		1.16015	0.0209892		1.0377	0.99501	1.03694	0.997406	1.04358	1.02289	0.998098	1.08367	1.02352	1.01596	1.06785
4.6031	1.01166	1.01712	0.978902	1.03479	0.988573	0.973662	0.98726	1.00446	1.00618	1.04726	1.06281	0.994234	1.03041	1.01517	1.01776	1.07727		1.01547	0.00734639			1.22177	1.15769	1.31649	1.09054	1.12128	1.14879	1.08578	1.10046	1.08258	1.18591	1.17307	1.247		1.16095	0.0209992		1.03752	0.995895	1.04242	1.00016	1.04912	1.02298	0.997785	1.08903	1.02471	1.01744	1.06902
4.61113	1.01492	1.02335	0.983308	1.03942	0.986835	0.9679	0.983963	1.00336	1.00712	1.04729	1.06333	0.995524	1.02852	1.01476	1.01546	1.07784		1.01581	0.0075614			1.22136	1.15934	1.31292	1.08999	1.11977	1.14168	1.08631	1.10157	1.08355	1.18325	1.17625	1.24201		1.15983	0.0206387		1.04029	0.993721	1.04049	0.998854	1.04806	1.02477	0.995587	1.08359	1.02107	1.01749	1.06875
4.61917	1.01257	1.01839	0.981048	1.0342	0.99079	0.975744	0.985607	1.00616	1.00806	1.04866	1.06568	0.996613	1.03147	1.01719	1.0187	1.08134		1.01702	0.0074503			1.22312	1.15483	1.31538	1.09247	1.12111	1.15211	1.08912	1.10358	1.0826	1.1869	1.17748	1.24478		1.16196	0.0207177		1.03854	0.9912	1.03816	0.999887	1.04464	1.02108	0.994574	1.08743	1.02341	1.01644	1.06666
4.6272	1.01415	1.0177	0.984738	1.03292	0.990717	0.978373	0.990663	1.00638	1.00852	1.04703	1.06632	0.995635	1.03001	1.01748	1.01742	1.07823		1.01727	0.00709257			1.221	1.15703	1.31848	1.09152	1.11657	1.14398	1.08905	1.10342	1.08401	1.18427	1.17463	1.2427		1.16055	0.0208397		1.04412	0.997102	1.04003	1.00048	1.04751	1.02438	0.998954	1.08422	1.0247	1.0173	1.06753
4.63523	1.00725	1.01604	0.977396	1.03544	0.989952	0.975762	0.989968	1.00459	1.00928	1.04945	1.06572	0.9952	1.0291	1.0176	1.01889	1.0741		1.01598	0.00726758			1.22419	1.15281	1.31937	1.09232	1.12008	1.14753	1.08534	1.09747	1.08705	1.18618	1.17428	1.24675		1.16111	0.0211611		1.04388	0.998818	1.03778	0.997289	1.04647	1.02358	0.997004	1.08677	1.02657	1.01746	1.06682
4.64327	1.01054	1.0174	0.981039	1.03456	0.990831	0.978228	0.990142	1.00532	1.00969	1.05153	1.06859	0.995983	1.03179	1.01727	1.02085	1.08156		1.01783	0.00747985			1.22404	1.1572	1.32194	1.09323	1.12062	1.15125	1.08695	1.09781	1.08294	1.18547	1.17379	1.24596		1.16177	0.0212758		1.04186	0.994723	1.03874	0.99807	1.04847	1.02576	0.99788	1.08834	1.02556	1.0166	1.06651
4.6513	1.01383	1.01991	0.979548	1.03873	0.983942	0.97004	0.985096	1.00043	1.00774	1.04524	1.06696	0.994099	1.03155	1.01817	1.01915	1.07961		1.01588	0.0077741			1.22714	1.15818	1.32206	1.09485	1.12228	1.14677	1.09098	1.09807	1.08476	1.18865	1.17695	1.24471		1.16295	0.0211517		1.04275	0.995884	1.04156	0.996585	1.04657	1.02616	0.998143	1.08622	1.02707	1.01658	1.06808
4.65933	1.01367	1.01855	0.979352	1.0388	0.986477	0.975599	0.98291	1.00269	1.00812	1.04755	1.07034	0.996908	1.03133	1.01782	1.01758	1.0787		1.01665	0.00768962			1.22644	1.15558	1.32274	1.09274	1.12063	1.14354	1.09191	1.10385	1.08685	1.18712	1.17822	1.24448		1.16284	0.0210541		1.04117	0.998211	1.04016	0.994204	1.04531	1.02706	0.998114	1.08665	1.02481	1.01829	1.06773
4.66737	1.01494	1.0193	0.978039	1.03663	0.993055	0.977056	0.985516	1.00415	1.00953	1.05076	1.06618	0.994629	1.02838	1.01707	1.01744	1.07622		1.01681	0.00735676			1.23052	1.16588	1.32523	1.09234	1.11984	1.14393	1.0838	1.09956	1.08357	1.18414	1.17579	1.24075		1.16211	0.0215604		1.04444	0.996528	1.04316	0.996939	1.04938	1.0261	0.997683	1.08729	1.02611	1.01736	1.06922
4.6754	1.01048	1.01706	0.97728	1.03589	0.988018	0.978889	0.985989	1.00425	1.00296	1.04657	1.06406	0.995629	1.03249	1.01708	1.01974	1.08678		1.01645	0.00770508			1.22531	1.15821	1.32866	1.09318	1.12092	1.14194	1.09068	1.09856	1.08618	1.18675	1.17498	1.24099		1.1622	0.0214097		1.04442	0.997691	1.04001	0.996514	1.04761	1.02387	0.994249	1.08971	1.03017	1.0197	1.06817
4.68343	1.01062	1.01799	0.977949	1.03546	0.994247	0.980329	0.989867	1.00505	1.00721	1.04878	1.06745	0.994905	1.0313	1.01722	1.01743	1.0805		1.01727	0.00736678			1.22954	1.15782	1.32554	1.09723	1.12041	1.14815	1.09108	1.09918	1.08474	1.18608	1.17288	1.24575		1.1632	0.0213347		1.04486	0.997322	1.0382	0.997563	1.04604	1.02605	0.996023	1.08889	1.02734	1.02076	1.07169
4.69147	1.01216	1.01936	0.979926	1.0379	0.995403	0.985955	0.993142	1.00877	1.00829	1.0484	1.06959	0.993436	1.02908	1.01811	1.01691	1.08148		1.01862	0.00723225			1.22647	1.15424	1.32723	1.09282	1.12488	1.14809	1.09429	1.10193	1.08742	1.18707	1.17636	1.23878		1.1633	0.0210226		1.04582	0.996036	1.04377	0.998528	1.0455	1.02495	0.99582	1.08621	1.02664	1.01984	1.06924
4.6995	1.01219	1.02135	0.979982	1.04058	0.990602	0.978221	0.989114	1.00229	1.00694	1.04937	1.07019	0.991434	1.03533	1.01889	1.01682	1.08423		1.01797	0.00781004			1.22822	1.16034	1.32738	1.09764	1.11966	1.14412	1.08863	1.10166	1.08213	1.18443	1.17656	1.24335		1.16284	0.0214482		1.03984	0.992905	1.04075	0.997295	1.04709	1.02594	0.99678	1.09309	1.02598	1.01907	1.06945
4.70753	1.00932	1.01832	0.980366	1.03434	0.991883	0.981274	0.990208	1.00373	1.00545	1.04631	1.06745	0.988754	1.0316	1.02156	1.01766	1.08467		1.01706	0.00754224			1.23251	1.16086	1.33153	1.09441	1.12254	1.15134	1.09423	1.10343	1.08384	1.18761	1.17581	1.24609		1.16535	0.0216489		1.04344	0.996135	1.04358	0.998303	1.04702	1.02597	0.996785	1.08984	1.0269	1.02131	1.06845
4.71557	1.01345	1.02058	0.984087	1.04041	0.991338	0.976767	0.989239	1.00334	1.00847	1.04843	1.06921	0.989583	1.03233	1.01672	1.01711	1.07679		1.01737	0.00742694			1.23162	1.15966	1.33162	1.09686	1.12167	1.1474	1.09201	1.10633	1.08605	1.1884	1.1822	1.24528		1.16576	0.0215576		1.04163	0.994519	1.03986	0.995588	1.04671	1.0296	0.996512	1.09342	1.0276	1.02128	1.07262
4.7236	1.01239	1.01925	0.979534	1.03577	0.984103	0.970847	0.980501	1.00249	1.00681	1.0474	1.07022	0.993685	1.03247	1.01733	1.02255	1.08257		1.01612	0.00803621			1.23208	1.16317	1.33215	1.09531	1.11969	1.14984	1.09936	1.1052	1.08419	1.18553	1.1747	1.24201		1.16527	0.0213986		1.046	0.994467	1.03951	0.996883	1.04825	1.02696	0.994472	1.09125	1.02842	1.01834	1.06962
4.73163	1.00951	1.01754	0.977007	1.04078	0.990077	0.977446	0.983456	1.00372	1.00203	1.04608	1.06966	0.991248	1.03152	1.02231	1.01684	1.07896		1.01614	0.00774188			1.23494	1.15934	1.33341	1.09625	1.12107	1.14937	1.09581	1.10227	1.08525	1.18665	1.17588	1.24184		1.16517	0.0216309		1.04782	0.997645	1.04258	0.998755	1.04941	1.02239	0.996258	1.08878	1.02518	1.01868	1.06925
4.73967	1.00988	1.01873	0.977441	1.0369	0.987033	0.977317	0.984854	1.00301	1.00374	1.04673	1.07024	0.992233	1.03151	1.02201	1.0226	1.08719		1.01696	0.00801517			1.23273	1.1614	1.33537	1.09603	1.12218	1.14897	1.09828	1.10602	1.08535	1.18461	1.17678	1.23851		1.16552	0.0214391		1.04638	0.999306	1.04452	0.999383	1.05083	1.03014	0.999519	1.09235	1.02698	1.01713	1.0717
4.7477	1.01106	1.0199	0.978796	1.0393	0.983406	0.973906	0.983841	1.00185	1.00449	1.04615	1.06787	0.99172	1.03179	1.01875	1.02026	1.07842		1.01572	0.00777981			1.23601	1.16523	1.33708	1.09947	1.12328	1.1525	1.09675	1.10223	1.08587	1.18411	1.17295	1.24323		1.16656	0.0217113		1.03944	0.994647	1.04177	0.99593	1.04588	1.02685	0.995825	1.09124	1.02914	1.0236	1.07269
4.75573	1.01339	1.01922	0.982346	1.03849	0.990651	0.972948	0.985499	1.0038	1.00716	1.04699	1.06964	0.989854	1.03181	1.01867	1.01562	1.08297		1.01682	0.00778925			1.23731	1.16135	1.3364	1.0993	1.11958	1.14509	1.09268	1.11266	1.0857	1.18563	1.17737	1.24502		1.16651	0.0217789		1.04304	0.995664	1.04359	1.00108	1.04742	1.02422	0.994833	1.08509	1.0279	1.02141	1.06935
4.76377	1.00774	1.01903	0.977522	1.03272	0.985203	0.973677	0.984617	1.00264	1.00581	1.04715	1.06916	0.990803	1.0326	1.02018	1.01517	1.08428		1.01552	0.00796551			1.23832	1.16417	1.33473	1.09602	1.1216	1.14745	1.09681	1.10435	1.08902	1.18785	1.17808	1.24468		1.16692	0.0217135		1.045	0.997717	1.04416	0.998966	1.05049	1.02544	0.997695	1.09446	1.02904	1.02011	1.07212
4.7718	1.01161	1.01579	0.980098	1.03818	0.987587	0.973647	0.985637	1.00131	1.00625	1.04898	1.06708	0.989837	1.03359	1.01795	1.01815	1.07988		1.01597	0.00774965			1.24013	1.16379	1.33936	1.09617	1.11936	1.14708	1.10076	1.1058	1.08754	1.18705	1.17867	1.24424		1.1675	0.021967		1.04302	0.998255	1.04334	0.998804	1.04746	1.02765	0.993831	1.09645	1.03111	1.02141	1.0732
4.77983	1.00872	1.01449	0.97786	1.03389	0.981324	0.969388	0.979747	1.00231	1.00508	1.04803	1.07196	0.993035	1.03175	1.01759	1.01542	1.08601		1.01479	0.00832676			1.24039	1.16182	1.33901	1.09945	1.11969	1.14609	1.09794	1.10822	1.08902	1.18859	1.1783	1.24298		1.16762	0.0218299		1.04552	0.995217	1.04092	0.996859	1.04545	1.02093	0.994235	1.09562	1.03332	1.02117	1.06934
4.78787	1.01363	1.01741	0.982099	1.03404	0.988434	0.975218	0.984919	1.00151	1.00501	1.04612	1.06674	0.989788	1.0346	1.0179	1.01792	1.0821		1.01609	0.00766298			1.24035	1.1566	1.34143	1.10317	1.12392	1.14816	1.10035	1.10678	1.08636	1.18683	1.17543	1.24588		1.16794	0.0219237		1.04577	0.995375	1.04539	0.996669	1.04904	1.02363	0.991759	1.09278	1.03114	1.02239	1.07157
4.7959	1.00998	1.0174	0.980171	1.03552	0.98844	0.976322	0.98345	1.00171	1.0037	1.04634	1.06588	0.988708	1.03539	1.01828	1.01615	1.07882		1.01539	0.00761746			1.2373	1.15626	1.34169	1.10191	1.12742	1.14828	1.09649	1.11052	1.08718	1.18476	1.17723	1.24473		1.16782	0.0217971		1.04737	0.996506	1.04151	1.00041	1.04794	1.02461	0.992664	1.09371	1.02838	1.01918	1.07016
4.80393	1.01213	1.02096	0.983265	1.03957	0.991019	0.978993	0.991738	1.00558	1.00344	1.04668	1.07021	0.983022	1.03353	1.02379	1.02411	1.08855		1.01854	0.00792614			1.23919	1.16405	1.34147	1.09825	1.12495	1.146	1.10296	1.11028	1.08652	1.18803	1.17513	1.24265		1.16829	0.0217779		1.0453	0.998264	1.04427	0.999338	1.04603	1.02696	0.996271	1.09231	1.0294	1.01863	1.07024
4.81197	1.00955	1.01885	0.978607	1.03714	0.989236	0.973894	0.986399	1.00323	1.00532	1.04435	1.07163	0.99067	1.03389	1.01922	1.01874	1.0854		1.01663	0.00796479			1.23986	1.15876	1.34419	1.1003	1.12025	1.14472	1.0983	1.10954	1.08694	1.18893	1.17865	1.2467		1.1681	0.0222401		1.04269	0.998188	1.04328	0.998579	1.0487	1.02713	0.996432	1.09501	1.03037	1.01914	1.074
4.82	1.00947	1.01819	0.977709	1.03492	0.991382	0.978721	0.98585	1.0028	1.00616	1.0469	1.06946	0.985791	1.03531	1.01985	1.01789	1.08614		1.01666	0.0079261			1.243	1.16451	1.34667	1.09839	1.12542	1.14303	1.10156	1.10916	1.08605	1.18771	1.17509	1.24324		1.16865	0.0222805		1.04428	1.00058	1.0456	0.999113	1.04997	1.02505	0.994193	1.09259	1.02788	1.01988	1.07342
4.82803	1.00899	1.01629	0.977065	1.03569	0.98639	0.974751	0.986821	1.00259	1.00396	1.04422	1.0711	0.982931	1.0316	1.01877	1.02056	1.08277		1.01528	0.00799876			1.24333	1.16029	1.34673	1.10207	1.12419	1.14525	1.09854	1.1126	1.08898	1.1865	1.17846	1.24492		1.16932	0.0221817		1.0462	0.998685	1.04406	0.996375	1.04818	1.02398	0.995023	1.09684	1.03049	1.01933	1.07107
4.83607	1.01033	1.01968	0.977263	1.03625	0.983876	0.972008	0.986686	1.00237	1.00603	1.04779	1.07129	0.989587	1.03438	1.0191	1.01485	1.07678		1.01552	0.00787183			1.24401	1.16242	1.3468	1.1	1.12536	1.15045	1.1018	1.11264	1.09048	1.18932	1.17981	1.24764		1.17089	0.02216		1.04577	0.998972	1.04248	0.996938	1.04849	1.02271	0.996249	1.09961	1.02456	1.01946	1.073
4.8441	1.01242	1.01897	0.980208	1.03627	0.983359	0.973589	0.982029	1.00292	1.00584	1.04801	1.06706	0.989262	1.03441	1.02127	1.0171	1.08102		1.01586	0.00789183			1.2448	1.15716	1.35048	1.10159	1.12469	1.14801	1.10118	1.10712	1.08674	1.18809	1.17433	1.24556		1.16914	0.0225661		1.04928	0.995606	1.04659	0.996511	1.05231	1.02448	0.992581	1.09428	1.02708	1.019	1.07178
4.85213	1.01005	1.02112	0.976811	1.03972	0.985658	0.970879	0.984462	1.00254	1.00372	1.04442	1.07352	0.98853	1.03582	1.02017	1.01494	1.08131		1.01585	0.00816277			1.24586	1.15717	1.35102	1.1033	1.11984	1.14737	1.09793	1.11212	1.08809	1.19079	1.17869	1.24568		1.16982	0.0226386		1.04499	1.00006	1.04201	0.995526	1.04769	1.02747	0.995179	1.09688	1.0304	1.01941	1.07376
4.86017	1.01063	1.01766	0.977337	1.03727	0.985953	0.973156	0.986511	1.0027	1.00762	1.04614	1.06838	0.989722	1.03235	1.02337	1.01861	1.08524		1.01641	0.00798317			1.24461	1.16549	1.35092	1.09744	1.12565	1.14643	1.10535	1.11014	1.0883	1.18804	1.17886	1.24325		1.17037	0.0224135		1.0458	0.99664	1.04442	1.00008	1.04973	1.02598	0.99766	1.09819	1.0275	1.02	1.07729
4.8682	1.00995	1.01944	0.97439	1.03735	0.988233	0.974588	0.989289	1.0064	1.00147	1.04629	1.07295	0.990372	1.03538	1.02227	1.01978	1.08177		1.01687	0.00798428			1.2472	1.16259	1.35062	1.1031	1.12641	1.14978	1.10807	1.10681	1.08559	1.18824	1.17309	1.24755		1.17075	0.0224834		1.0474	0.997078	1.04358	0.994689	1.04864	1.02647	0.994802	1.10179	1.03112	1.02219	1.07726
4.87623	1.009	1.02179	0.974672	1.03758	0.980938	0.967598	0.978343	1.00145	1.00393	1.04708	1.07336	0.989074	1.03344	1.02016	1.01644	1.08527		1.01501	0.00858485			1.24804	1.16335	1.3493	1.09892	1.12183	1.15105	1.10589	1.10926	1.08658	1.18817	1.18067	1.24302		1.17051	0.0224529		1.04592	0.999187	1.04567	0.99704	1.04921	1.02679	0.995911	1.10177	1.03532	1.01945	1.07672
4.88427	1.0107	1.02055	0.975486	1.0362	0.984864	0.97259	0.982747	1.00281	1.00273	1.04618	1.06895	0.985223	1.03435	1.0202	1.02133	1.08555		1.01565	0.00823815			1.24852	1.16065	1.35207	1.09822	1.12573	1.14987	1.10777	1.11412	1.09025	1.18912	1.17673	1.24879		1.17182	0.022505		1.04894	1.00097	1.04519	0.998031	1.05145	1.01993	0.995738	1.1034	1.03487	1.02324	1.07558
4.8923	1.01092	1.02047	0.975363	1.03762	0.98439	0.975391	0.986755	1.0026	1.00531	1.04626	1.06595	0.983244	1.03181	1.02177	1.0153	1.08664		1.01561	0.00809258			1.24682	1.16127	1.35097	1.09817	1.12126	1.15347	1.1098	1.11297	1.09007	1.18727	1.1767	1.24588		1.17122	0.022341		1.04707	0.996459	1.04435	0.994195	1.05032	1.02245	0.992944	1.09852	1.03209	1.018	1.07449
4.90033	1.01201	1.01936	0.974872	1.03677	0.985237	0.973648	0.984256	1.00028	1.00083	1.04678	1.06886	0.984853	1.03155	1.01904	1.01973	1.08778		1.01537	0.00829084			1.24666	1.16077	1.35298	1.1018	1.12158	1.14533	1.10634	1.10967	1.09123	1.19037	1.17698	1.24779		1.17096	0.0226049		1.04369	0.998512	1.04438	0.997432	1.04652	1.02406	0.994493	1.09755	1.02702	1.01966	1.07607
4.90837	1.00825	1.01827	0.973196	1.03699	0.984658	0.975808	0.98712	1.00486	1.00517	1.04766	1.07095	0.987729	1.03329	1.02445	1.02385	1.07607		1.01614	0.0078718			1.25397	1.1652	1.35573	1.10362	1.12472	1.14932	1.10719	1.11152	1.0883	1.18819	1.17764	1.24619		1.17263	0.0227982		1.04362	0.994377	1.04158	0.994478	1.04951	1.0258	0.994172	1.10533	1.03112	1.02047	1.07752
4.9164	1.01064	1.02038	0.973416	1.03849	0.987722	0.974798	0.990522	1.0061	1.00221	1.04694	1.072	0.987628	1.03254	1.02346	1.02473	1.0859		1.01734	0.00815509			1.25111	1.15902	1.35576	1.09844	1.12756	1.14956	1.10814	1.1125	1.09368	1.19199	1.18184	1.2484		1.17317	0.0227227		1.04431	0.995335	1.04453	0.997438	1.04954	1.02388	0.993493	1.10315	1.03102	1.02197	1.07668
4.92443	1.01279	1.0188	0.975074	1.03795	0.98316	0.971552	0.984768	1.00107	1.00673	1.05205	1.06787	0.982089	1.03129	1.01999	1.01864	1.07616		1.015	0.00803973			1.25333	1.16288	1.35623	1.10047	1.12315	1.14923	1.11019	1.11126	1.08837	1.19132	1.17455	1.24543		1.1722	0.0228526		1.04655	0.997668	1.04483	0.996017	1.05085	1.02691	0.99473	1.10336	1.03436	1.02277	1.07893
4.93247	1.00839	1.01754	0.974683	1.03585	0.985086	0.970083	0.986263	1.00273	1.00256	1.04746	1.07416	0.989827	1.03641	1.02608	1.02091	1.0835		1.01635	0.00832173			1.25204	1.16487	1.35696	1.10149	1.12475	1.15031	1.10669	1.11281	1.08552	1.18625	1.17285	1.24171		1.17135	0.0228046		1.04883	0.993719	1.04265	0.995334	1.04892	1.02332	0.993377	1.10426	1.0312	1.01917	1.07847
4.9405	1.0067	1.0191	0.970531	1.03745	0.982961	0.968925	0.983317	1.00351	1.00021	1.04448	1.06817	0.988491	1.03652	1.02316	1.01728	1.08661		1.01484	0.00844909			1.25292	1.16314	1.35626	1.10149	1.1224	1.15135	1.10574	1.11131	1.08714	1.18696	1.17463	1.24218		1.17129	0.02284		1.04796	0.997686	1.04785	0.997354	1.0515	1.02499	0.995989	1.10466	1.03248	1.02088	1.07688
4.94853	1.01116	1.01782	0.973383	1.03539	0.98744	0.976202	0.986925	1.00691	1.00094	1.04577	1.07342	0.986931	1.03558	1.02291	1.02556	1.08419		1.01691	0.00815488			1.24927	1.16221	1.35801	1.104	1.12708	1.1537	1.1104	1.10941	1.09069	1.18951	1.17745	1.2474		1.17326	0.0226916		1.04762	0.996508	1.04941	0.996984	1.04769	1.02335	0.995216	1.102	1.032	1.02157	1.07836
4.95657	1.0101	1.01993	0.975445	1.03684	0.985234	0.974675	0.987603	1.00262	1.00391	1.04885	1.06874	0.988223	1.03616	1.02274	1.01785	1.07995		1.01618	0.00793			1.25332	1.16677	1.36302	1.10162	1.12499	1.15299	1.10983	1.11605	1.08531	1.18745	1.17511	1.24481		1.17344	0.023141		1.04937	0.99461	1.04826	0.998352	1.05058	1.021	0.992263	1.10429	1.03269	1.02433	1.07957
4.9646	1.01072	1.02081	0.97256	1.0396	0.983124	0.971091	0.984099	1.00279	0.999651	1.04563	1.073	0.987153	1.03784	1.02704	1.02228	1.08008		1.01609	0.00835556			1.25202	1.1679	1.36145	1.10375	1.12892	1.15267	1.11523	1.11176	1.09089	1.18918	1.17869	1.24242		1.17457	0.0226718		1.04643	0.992181	1.04691	0.993027	1.04806	1.02234	0.992428	1.1068	1.03371	1.02348	1.07886
4.97263	1.01259	1.02288	0.973642	1.04038	0.979381	0.971326	0.982692	1.0019	1.00172	1.04649	1.07366	0.984191	1.03536	1.0253	1.01585	1.08143		1.01555	0.00849072			1.25544	1.16795	1.35616	1.10449	1.12655	1.14819	1.10976	1.11694	1.08826	1.18895	1.17794	1.24314		1.17365	0.022589		1.04728	0.993719	1.05001	0.995404	1.05276	1.02353	0.992715	1.10529	1.03284	1.02501	1.07893
4.98067	1.01095	1.01862	0.971732	1.03727	0.979073	0.971738	0.980057	1.00273	1.00114	1.04708	1.07325	0.983221	1.03511	1.02635	1.0222	1.07962		1.01501	0.00849406			1.25527	1.16545	1.36231	1.10161	1.12759	1.15566	1.11831	1.11054	1.08911	1.19159	1.17834	1.24257		1.17486	0.0229005		1.0497	0.99528	1.04571	0.99508	1.05027	1.0246	0.994754	1.10487	1.02938	1.02105	1.07914
4.9887	1.01586	1.02342	0.976214	1.04162	0.977009	0.965557	0.976904	1.00091	1.00169	1.04713	1.07715	0.985021	1.03816	1.02485	1.02233	1.087		1.0163	0.00904551			1.25668	1.16418	1.36213	1.10122	1.12734	1.15034	1.11629	1.11333	1.09053	1.19334	1.1786	1.24398		1.17483	0.0229663		1.04535	0.993221	1.0471	0.993901	1.05003	1.02566	0.990945	1.10433	1.03734	1.02186	1.07762
4.99673	1.01107	1.02311	0.974338	1.03839	0.983796	0.977144	0.991206	1.00296	1.00559	1.04811	1.07486	0.985164	1.03563	1.02535	1.01884	1.08021		1.01723	0.0081079			1.25473	1.16386	1.36546	1.10152	1.12468	1.15032	1.11157	1.11688	1.09087	1.18979	1.17756	1.24316		1.1742	0.0231329		1.04926	0.996741	1.05059	0.9921	1.05323	1.02226	0.992132	1.11243	1.0357	1.02425	1.081
5.00477	1.00978	1.01873	0.974051	1.03781	0.983726	0.975525	0.989233	1.00194	1.00161	1.04417	1.07295	0.989909	1.03843	1.02902	1.02036	1.08377		1.01694	0.008183			1.25628	1.16105	1.36428	1.10129	1.12445	1.15272	1.11901	1.11674	1.0899	1.19233	1.17889	1.24639		1.17528	0.0230767		1.04763	0.995081	1.04695	0.996348	1.05086	1.02472	0.994347	1.1049	1.03327	1.0228	1.07687
5.0128	1.01231	1.02135	0.972977	1.03711	0.983002	0.977101	0.990412	1.00226	1.00269	1.04837	1.07022	0.985342	1.03734	1.0232	1.0241	1.08632		1.01713	0.00826303			1.26009	1.16342	1.3656	1.10441	1.12859	1.1508	1.11143	1.11165	1.08893	1.19195	1.17669	1.24287		1.1747	0.0233192		1.04879	0.996789	1.05312	0.99731	1.04955	1.02775	0.99414	1.11322	1.03699	1.02256	1.08279
5.02083	1.01296	1.018	0.970784	1.03711	0.982996	0.976551	0.993389	1.00415	1.00128	1.04726	1.07323	0.984332	1.04032	1.02831	1.01943	1.08242		1.01703	0.00827203			1.25795	1.15916	1.36461	1.10293	1.12313	1.15367	1.11413	1.11825	1.08822	1.19257	1.177	1.24219		1.17448	0.0231439		1.05228	0.992522	1.04597	0.99667	1.05291	1.02451	0.992422	1.10751	1.03493	1.02012	1.07837
5.02887	1.0092	1.01781	0.969347	1.0359	0.982208	0.978131	0.990636	1.00342	1.00278	1.04719	1.06386	0.983098	1.03637	1.02517	1.02289	1.08483		1.0158	0.00811452			1.25762	1.17035	1.36753	1.10441	1.12465	1.15146	1.11771	1.11565	1.08806	1.19244	1.17662	1.24325		1.17581	0.023243		1.05137	0.993664	1.0505	0.995751	1.05139	1.02671	0.994018	1.11054	1.03585	1.02081	1.07957
5.0369	1.00982	1.01861	0.972973	1.03718	0.980558	0.975602	0.986849	1.0026	1.00414	1.04598	1.07284	0.983483	1.0377	1.02747	1.01999	1.08204		1.01611	0.00830898			1.26156	1.16011	1.36685	1.10312	1.12671	1.14739	1.11186	1.11306	1.08984	1.19073	1.17735	1.24553		1.17451	0.0235296		1.04974	0.994521	1.04679	0.994615	1.04917	1.0277	0.993225	1.10784	1.03837	1.02488	1.08255
5.04493	1.00906	1.014	0.970778	1.03344	0.984857	0.979496	0.987045	1.00519	1.00408	1.04651	1.07183	0.984244	1.03591	1.02559	1.02187	1.08335		1.01608	0.0081437			1.26043	1.16687	1.36561	1.10244	1.12405	1.14861	1.11955	1.11869	1.08994	1.18975	1.17922	1.24611		1.17594	0.0231948		1.04915	0.998148	1.05178	0.99666	1.05304	1.02622	0.993377	1.10742	1.03456	1.02421	1.08051
5.05297	1.00809	1.01902	0.966216	1.03393	0.981226	0.97552	0.984689	1.00191	1.00181	1.04592	1.073	0.98306	1.03544	1.02469	1.02194	1.08394		1.01503	0.00851942			1.2589	1.16749	1.36715	1.10219	1.12585	1.15276	1.11512	1.11335	1.08621	1.18907	1.17715	1.24153		1.17473	0.0233754		1.04683	0.992751	1.04715	0.99333	1.0499	1.02431	0.992058	1.11196	1.03301	1.02345	1.08153
5.061	1.00708	1.01823	0.96818	1.03475	0.977925	0.975289	0.985746	1.00212	1.00195	1.0432	1.07412	0.984711	1.03692	1.02803	1.01541	1.08089		1.01466	0.00841546			1.26004	1.16795	1.37189	1.10348	1.12732	1.16	1.1173	1.11764	1.08702	1.18769	1.17209	1.24092		1.17611	0.0234395		1.04667	0.99284	1.04604	0.991297	1.05226	1.02297	0.990456	1.11296	1.03182	1.02406	1.07925
5.06903	1.01033	1.02104	0.97096	1.04039	0.981105	0.974804	0.988115	1.0037	0.997817	1.044	1.07025	0.981231	1.03887	1.02989	1.02038	1.08651		1.01621	0.00853878			1.26461	1.16927	1.36923	1.10003	1.1228	1.14792	1.11956	1.11898	1.08949	1.19172	1.1763	1.2425		1.17603	0.0235511		1.05263	0.991109	1.04785	0.992895	1.05549	1.02164	0.992154	1.10979	1.03418	1.02054	1.07813
5.07707	1.01195	1.0206	0.966937	1.04025	0.98283	0.979168	0.988096	1.00425	1.00228	1.04483	1.07351	0.984446	1.03623	1.03108	1.02106	1.08459		1.01701	0.00843578			1.26252	1.16318	1.36949	1.10626	1.1278	1.15688	1.11517	1.11847	1.09378	1.19194	1.17959	1.24846		1.17779	0.0233372		1.04788	0.992934	1.04807	0.992658	1.05167	1.02526	0.99076	1.11305	1.03435	1.02649	1.08295
5.0851	1.01242	1.02325	0.973003	1.04128	0.979353	0.976504	0.982602	1.00206	1.00033	1.04716	1.06929	0.980993	1.03552	1.02773	1.02209	1.08457		1.01614	0.0084915			1.26391	1.16413	1.37028	1.09906	1.12197	1.15282	1.11556	1.11667	1.08791	1.18901	1.17839	1.24421		1.17533	0.0237959		1.0525	0.987904	1.04487	0.992251	1.05017	1.027	0.994884	1.11356	1.03548	1.02576	1.08275
5.09313	1.01016	1.01791	0.966719	1.03635	0.981286	0.97912	0.985827	1.00393	1.00067	1.04567	1.07625	0.987646	1.04161	1.02909	1.0187	1.09184		1.01705	0.00880818			1.26124	1.15833	1.37328	1.10255	1.12413	1.15204	1.11877	1.11294	1.09013	1.19044	1.1776	1.24813		1.1758	0.0238673		1.0483	0.991448	1.04602	0.991393	1.05071	1.02239	0.9896	1.11052	1.03797	1.02464	1.08151
5.10117	1.00901	1.01949	0.969807	1.03828	0.988136	0.979513	0.990823	1.00547	1.00195	1.04478	1.07258	0.984063	1.03691	1.02689	1.02523	1.08426		1.01732	0.00818101			1.26357	1.16162	1.37446	1.10508	1.12953	1.15146	1.1198	1.11477	1.09004	1.18999	1.175	1.23913		1.1762	0.0236021		1.05258	0.98921	1.04977	0.993665	1.05399	1.0282	0.992921	1.11381	1.03992	1.02475	1.08353
5.1092	1.01025	1.01889	0.96999	1.04104	0.980169	0.974178	0.984561	1.00066	0.999426	1.0431	1.07488	0.983746	1.04027	1.02732	1.02039	1.08526		1.01588	0.00868209			1.26476	1.1618	1.37117	1.10244	1.12184	1.15514	1.1191	1.11493	1.09004	1.19023	1.17631	1.24299		1.17589	0.0236766		1.0528	0.993167	1.0532	0.991184	1.05372	1.02425	0.99234	1.11507	1.03594	1.02796	1.08209
5.11723	1.0096	1.02062	0.968411	1.03887	0.983493	0.981805	0.988145	1.00483	1.00301	1.04488	1.07861	0.9806	1.03998	1.02896	1.01676	1.08432		1.01706	0.00855039			1.26812	1.17527	1.37426	1.10498	1.12928	1.15524	1.12325	1.11511	1.08884	1.19076	1.17835	1.24375		1.17893	0.0237169		1.05157	0.991847	1.05288	0.994441	1.05274	1.02144	0.993012	1.11376	1.03606	1.02649	1.08129
5.12527	1.0142	1.02053	0.972772	1.04062	0.983142	0.980962	0.990113	1.00277	1.00136	1.04296	1.0711	0.983997	1.03561	1.02913	1.02092	1.08208		1.01702	0.00805798			1.26578	1.16842	1.37589	1.10366	1.12549	1.15463	1.11801	1.11448	1.08699	1.18909	1.17601	1.24078		1.1766	0.0239553		1.05278	0.992157	1.05129	0.993784	1.05293	1.02598	0.992236	1.11275	1.03471	1.02219	1.08175
5.1333	1.01005	1.02101	0.973626	1.03814	0.978926	0.979915	0.984637	1.00119	1.00037	1.044	1.07392	0.981393	1.03583	1.02865	1.0213	1.08807		1.01632	0.00855869			1.26623	1.16094	1.37315	1.10671	1.1271	1.1506	1.11659	1.11469	1.09349	1.19548	1.18037	1.24074		1.17718	0.0236363		1.05168	0.991185	1.0488	0.991659	1.05262	1.02293	0.991292	1.11292	1.03805	1.02244	1.07898
5.14133	1.00905	1.01889	0.972034	1.03716	0.979263	0.978739	0.987641	1.0046	1.00375	1.04792	1.07592	0.979725	1.03735	1.02677	1.02314	1.08883		1.01692	0.00868389			1.26766	1.16283	1.37596	1.10014	1.12911	1.15343	1.12006	1.11597	1.08848	1.1903	1.17489	1.24493		1.17698	0.0240516		1.05285	0.9936	1.04813	0.994039	1.05285	1.02503	0.992301	1.11673	1.04055	1.02525	1.08445
5.14937	1.01053	1.02142	0.967677	1.04045	0.984621	0.983797	0.987678	1.00381	0.997002	1.04428	1.07723	0.982931	1.04255	1.02994	1.02207	1.08562		1.0176	0.00858998			1.27483	1.16905	1.37617	1.10553	1.12705	1.15758	1.1223	1.1156	1.08915	1.19085	1.17743	1.24281		1.17903	0.024032		1.05546	0.995273	1.05082	0.991626	1.05049	1.02575	0.991513	1.11891	1.03686	1.03039	1.0835
5.1574	1.01275	1.0206	0.971376	1.03779	0.987457	0.985213	0.994515	1.00524	0.998789	1.0428	1.07621	0.980818	1.03963	1.02991	1.01644	1.08864		1.01801	0.0083363			1.27144	1.16654	1.37562	1.10408	1.12994	1.15707	1.12133	1.11382	1.0914	1.18909	1.17665	1.24689		1.17866	0.0239671		1.05237	0.992163	1.05201	0.994986	1.05341	1.02482	0.994776	1.11575	1.03542	1.02448	1.08424
5.16543	1.01264	1.02488	0.974147	1.04143	0.980461	0.983011	0.99086	1.00228	0.999435	1.04806	1.08005	0.979786	1.04061	1.0307	1.0233	1.08589		1.0186	0.0086672			1.27119	1.16593	1.37615	1.10401	1.12518	1.14928	1.11824	1.11576	1.09097	1.19091	1.17595	1.24324		1.17724	0.0240927		1.05351	0.99222	1.04747	0.994506	1.05037	1.02408	0.991711	1.11314	1.03235	1.02018	1.08269
5.17347	1.00927	1.01954	0.969913	1.0408	0.974954	0.975633	0.985211	1.00231	1.00382	1.047	1.07464	0.981701	1.038	1.03186	1.01906	1.0868		1.01628	0.00883343			1.2687	1.16471	1.37675	1.10068	1.12435	1.15436	1.12276	1.11855	1.09024	1.18921	1.17418	1.24254		1.17725	0.02398		1.05425	0.993422	1.05097	0.992143	1.05295	1.02572	0.994354	1.11478	1.03905	1.02479	1.08375
5.1815	1.01121	1.01902	0.970722	1.04099	0.978057	0.977563	0.981565	1.00381	1.00012	1.04204	1.07186	0.981265	1.03931	1.03232	1.01889	1.09135		1.01626	0.00882959			1.27249	1.16007	1.37583	1.10367	1.12896	1.15246	1.12179	1.1174	1.08981	1.1907	1.17152	1.24086		1.17713	0.0239515		1.05368	0.993933	1.05117	0.990399	1.05141	1.02304	0.994002	1.1155	1.03592	1.02232	1.08123
5.18953	1.00836	1.01857	0.968623	1.03716	0.983969	0.984407	0.990787	1.0059	0.999987	1.04353	1.07402	0.979471	1.03889	1.02996	1.02094	1.08228		1.01668	0.00825741			1.26719	1.1666	1.38099	1.10011	1.12928	1.15239	1.11765	1.11702	1.09038	1.19186	1.17678	1.24343		1.17781	0.024293		1.05523	0.993101	1.04802	0.992003	1.04944	1.0254	0.9952	1.1195	1.03693	1.02583	1.08273
5.19757	1.01203	1.02125	0.970355	1.04164	0.980796	0.979929	0.986562	1.00201	1.00104	1.04342	1.07425	0.981796	1.03655	1.02661	1.02606	1.0894		1.01711	0.00864311			1.26709	1.16742	1.3767	1.10412	1.12681	1.15715	1.12343	1.117	1.08846	1.19061	1.1777	1.24113		1.17814	0.0238211		1.05579	0.995585	1.04999	0.992776	1.05111	1.02391	0.992666	1.11911	1.03615	1.0264	1.08408
5.2056	1.01376	1.02069	0.972114	1.04877	0.978937	0.975903	0.989927	1.00164	1.0001	1.04679	1.07239	0.980335	1.03821	1.0272	1.02584	1.09203		1.01779	0.0088958			1.26904	1.16404	1.38016	1.10284	1.13339	1.15426	1.11721	1.11556	1.09034	1.19015	1.17591	1.24434		1.1781	0.0242125		1.0563	0.994409	1.04954	0.991065	1.05286	1.02201	0.995647	1.12109	1.03707	1.02536	1.08616
5.21363	1.00823	1.01858	0.969595	1.04383	0.980931	0.982215	0.985492	1.00066	0.99924	1.04499	1.07468	0.979757	1.03802	1.03056	1.02182	1.0831		1.01636	0.00857361			1.26931	1.17068	1.38308	1.10281	1.12829	1.15722	1.11412	1.11911	1.08709	1.19026	1.17572	1.24054		1.17819	0.0244457		1.05228	0.992979	1.05018	0.990889	1.05194	1.02311	0.991022	1.11529	1.03949	1.02576	1.08361
5.22167	1.01144	1.02904	0.974718	1.04038	0.974584	0.978501	0.986649	1.00225	0.998613	1.04298	1.07483	0.977791	1.0398	1.02989	1.02169	1.09037		1.0171	0.00887794			1.26946	1.17172	1.38055	1.10078	1.1305	1.15018	1.12431	1.11509	1.09176	1.19077	1.17613	1.24354		1.17873	0.0241769		1.0552	0.993627	1.04932	0.992253	1.04965	1.02337	0.993361	1.11406	1.03698	1.02384	1.08068
5.2297	1.01369	1.0212	0.980604	1.03622	0.981156	0.981839	0.986668	1.00339	1.00246	1.04434	1.07616	0.976323	1.03309	1.02863	1.01989	1.08459		1.01689	0.00827453			1.26876	1.16591	1.38345	1.10025	1.12849	1.14832	1.12345	1.11294	1.09084	1.19114	1.1752	1.24285		1.17763	0.0244887		1.05415	0.994248	1.0526	0.992457	1.04778	1.02081	0.995758	1.11902	1.03658	1.02462	1.08105
5.23773	1.00816	1.01729	0.968865	1.03225	0.977023	0.976897	0.987783	1.00174	1.00312	1.0427	1.07241	0.976177	1.0362	1.0312	1.02609	1.09697		1.01593	0.00902307			1.26869	1.16899	1.38535	1.10136	1.12767	1.15524	1.12278	1.12027	1.09145	1.18931	1.17652	1.23802		1.1788	0.0242807		1.05133	0.994312	1.05173	0.99467	1.05068	1.01819	0.99133	1.11517	1.03588	1.02494	1.08291
5.24577	1.01032	1.02011	0.970914	1.03888	0.977718	0.977044	0.980184	1.00041	0.999975	1.04548	1.08153	0.978078	1.04137	1.03065	1.02282	1.09707		1.01703	0.00944989			1.27081	1.16846	1.38725	1.10104	1.12766	1.15107	1.12016	1.11677	1.08963	1.19066	1.1728	1.24176		1.17817	0.0247458		1.052	0.993792	1.04864	0.991167	1.05086	1.02453	0.992632	1.11596	1.03824	1.02901	1.08282
5.2538	1.0126	1.02054	0.97636	1.0353	0.98198	0.983279	0.993239	1.00441	1.00188	1.04471	1.07837	0.9809	1.03929	1.02867	1.02438	1.09616		1.01888	0.00867677			1.27195	1.16825	1.38367	1.09944	1.13035	1.15145	1.12214	1.11846	1.0887	1.18878	1.17257	1.24144		1.1781	0.0244917		1.05442	0.991885	1.0538	0.989823	1.05446	1.02201	0.997139	1.12037	1.03733	1.0271	1.0832
5.26183	1.0101	1.02111	0.970765	1.03979	0.980245	0.97893	0.986889	0.999964	0.999713	1.0421	1.0786	0.978007	1.0406	1.03105	1.01743	1.09307		1.01677	0.00901466			1.26772	1.16355	1.38454	1.10209	1.13452	1.15604	1.12735	1.11691	1.08905	1.19195	1.17535	1.24181		1.17924	0.0242333		1.05431	0.993537	1.05121	0.993277	1.05591	1.02127	0.992104	1.12242	1.03904	1.02476	1.0849
5.26987	1.00875	1.01904	0.970623	1.03754	0.982389	0.978774	0.99188	1.00374	1.00245	1.04418	1.07794	0.975189	1.04069	1.03196	1.02199	1.0925		1.01748	0.00890452			1.26972	1.16736	1.38204	1.10078	1.12955	1.15434	1.12654	1.12099	1.0876	1.19224	1.17541	1.2431		1.17914	0.0242357		1.05493	0.993594	1.05372	0.994933	1.05269	1.02538	0.994848	1.11266	1.03927	1.02381	1.08343
5.2779	1.01265	1.01921	0.974576	1.04379	0.976784	0.978079	0.982046	1.00229	0.999472	1.0451	1.08503	0.977263	1.03941	1.03324	1.02167	1.09106		1.01761	0.00928323			1.27266	1.17044	1.38659	1.09937	1.13147	1.15318	1.12374	1.11745	1.08984	1.19059	1.17271	1.24501		1.17942	0.0246988		1.05195	0.995335	1.05177	0.994006	1.05436	1.02114	0.992163	1.12274	1.0376	1.02508	1.0849
5.28593	1.0113	1.01919	0.971366	1.04245	0.980051	0.978295	0.991664	1.00222	0.999414	1.04293	1.07908	0.978459	1.04148	1.03043	1.02323	1.09491		1.0179	0.00905697			1.27157	1.17045	1.38492	1.10041	1.12792	1.15207	1.12515	1.11805	1.08766	1.1929	1.17406	1.24236		1.17896	0.0245793		1.05339	0.994835	1.05289	0.990952	1.05546	1.02334	0.993516	1.12454	1.03259	1.0243	1.08783
5.29397	1.00906	1.01799	0.971914	1.03672	0.981115	0.976797	0.987892	1.00179	1.00023	1.04534	1.07793	0.975069	1.04131	1.03333	1.02035	1.0878		1.01654	0.00887458			1.26872	1.16772	1.38856	1.10306	1.12502	1.15235	1.12423	1.12008	1.08801	1.19451	1.17277	1.24271		1.17898	0.0247062		1.05519	0.99308	1.05342	0.992286	1.05129	1.02238	0.993554	1.12365	1.03787	1.0281	1.08687
5.302	1.00763	1.01789	0.972729	1.03397	0.979776	0.977885	0.985435	1.00113	0.99933	1.04721	1.07796	0.976637	1.03725	1.03374	1.02945	1.09163		1.01685	0.00901046			1.27141	1.17087	1.38716	1.10265	1.12689	1.15439	1.12649	1.11597	1.08887	1.18925	1.17011	1.24465		1.17906	0.024685		1.05525	0.995535	1.05607	0.994144	1.05379	1.02278	0.995111	1.11992	1.04148	1.02327	1.08438
5.31003	1.01141	1.01964	0.973963	1.03686	0.976981	0.977246	0.985895	0.998739	1.00233	1.04816	1.08171	0.977159	1.03908	1.03125	1.02533	1.0869		1.01704	0.00898481			1.26934	1.16789	1.38936	1.1018	1.12953	1.1534	1.12613	1.11685	1.08781	1.19049	1.17385	1.24087		1.17894	0.0247038		1.05493	0.99365	1.05489	0.996052	1.05317	1.02277	0.991967	1.12484	1.03769	1.02631	1.08749
5.31807	1.00951	1.01937	0.975938	1.03576	0.9801	0.979571	0.990847	1.00273	0.998623	1.04407	1.07639	0.976097	1.03918	1.03222	1.02348	1.09435		1.01739	0.00884264			1.27025	1.16663	1.38616	1.10491	1.12682	1.14736	1.1209	1.11833	1.08923	1.19293	1.17495	1.24015		1.17822	0.0245665		1.05877	0.993935	1.05373	0.994812	1.05452	1.02381	0.991405	1.1232	1.03486	1.02226	1.08403
5.3261	1.00942	1.01818	0.973184	1.03513	0.976085	0.9745	0.987326	1.00049	1.00315	1.04652	1.07977	0.976453	1.03907	1.03263	1.02039	1.08648		1.01617	0.00893208			1.26874	1.16725	1.3869	1.102	1.12317	1.15536	1.12709	1.11801	1.09064	1.19211	1.17417	1.23838		1.17865	0.0244576		1.05258	0.996898	1.05601	0.992283	1.05368	1.02002	0.989126	1.1247	1.03738	1.02491	1.08557
5.33413	1.00933	1.02156	0.973216	1.03705	0.98069	0.979212	0.989656	1.00365	1.00138	1.04693	1.08238	0.975344	1.03687	1.03652	1.01665	1.08853		1.01744	0.0089236			1.27223	1.1704	1.3912	1.10064	1.13086	1.1533	1.12824	1.11965	1.08773	1.19377	1.17384	1.23781		1.17997	0.0247772		1.05466	0.994863	1.05545	0.990923	1.05345	1.02278	0.994053	1.12414	1.03344	1.02398	1.08284
5.34217	1.00875	1.01814	0.971561	1.03892	0.980468	0.979698	0.994338	1.00259	0.999914	1.04151	1.08045	0.976115	1.03867	1.03189	1.01733	1.0887		1.01682	0.00877588			1.27393	1.16844	1.38821	1.10053	1.12904	1.15571	1.1299	1.1183	1.08526	1.19136	1.17177	1.2388		1.17927	0.024734		1.05338	0.992061	1.05441	0.990519	1.0516	1.0231	0.992155	1.1217	1.03431	1.02471	1.0844
5.3502	1.01041	1.02041	0.971366	1.03762	0.979162	0.975697	0.992259	1.00272	0.997687	1.04109	1.079	0.976578	1.03396	1.02916	1.01774	1.09571		1.01629	0.0090302			1.27185	1.16964	1.38975	1.1029	1.12746	1.15171	1.12912	1.11829	1.08677	1.19303	1.17079	1.24209		1.17945	0.0248083		1.0566	0.995042	1.0566	0.991729	1.05611	1.02135	0.993692	1.12379	1.03662	1.021	1.08602
5.35823	1.01058	1.01782	0.973649	1.0374	0.979607	0.976474	0.992641	1.00153	0.999924	1.0457	1.08065	0.974655	1.03911	1.03207	1.00991	1.07524		1.01544	0.00848749			1.27484	1.17391	1.39195	1.10072	1.12657	1.14885	1.12741	1.11767	1.0886	1.19298	1.17	1.23959		1.17942	0.0250582		1.0552	0.994888	1.05235	0.990376	1.04997	1.02026	0.990325	1.1215	1.03889	1.02426	1.08382
5.36627	1.00969	1.01701	0.969222	1.03837	0.977371	0.973759	0.987431	1.0021	0.998047	1.04638	1.07764	0.977116	1.03872	1.0347	1.01952	1.0914		1.01616	0.0091598			1.27113	1.17088	1.39448	1.10159	1.12507	1.1515	1.12432	1.12175	1.08864	1.19184	1.17286	1.23932		1.17945	0.025062		1.05921	0.995711	1.05397	0.990588	1.05459	1.02038	0.991425	1.11469	1.03088	1.02084	1.08038
5.3743	1.01063	1.0164	0.968514	1.03795	0.981167	0.977869	0.986947	1.00114	0.999839	1.04813	1.07506	0.975651	1.03707	1.03108	1.01742	1.09512		1.01625	0.00909211			1.27294	1.16723	1.39101	1.09912	1.12973	1.15705	1.12599	1.12073	1.08963	1.19653	1.17378	1.23907		1.18024	0.0248204		1.05811	0.994102	1.05526	0.990265	1.05414	1.02472	0.995074	1.12291	1.03579	1.02301	1.08682
5.38233	1.00794	1.01613	0.968556	1.0386	0.980074	0.974526	0.989191	1.00389	1.00339	1.04847	1.0793	0.976469	1.03516	1.02865	1.01895	1.09069		1.01625	0.00903689			1.2722	1.17017	1.39341	1.10143	1.13314	1.15821	1.12795	1.1212	1.08847	1.19168	1.17342	1.24345		1.18123	0.0248813		1.0577	0.993059	1.05334	0.990019	1.0545	1.02107	0.99213	1.12148	1.03715	1.02299	1.08445
5.39037	1.01092	1.01736	0.969252	1.03888	0.982717	0.977369	0.987128	1.00317	0.99877	1.04726	1.07977	0.978291	1.04078	1.03165	1.02646	1.09601		1.01786	0.00922229			1.2739	1.16568	1.3925	1.09809	1.12852	1.15221	1.12478	1.12283	1.0855	1.18936	1.16869	1.23913		1.17843	0.0251123		1.05454	0.994877	1.05482	0.989275	1.05449	1.02234	0.991694	1.12349	1.03833	1.026	1.08533
5.3984	1.00736	1.01763	0.968163	1.04021	0.983956	0.978655	0.988729	1.00133	1.00238	1.04405	1.07861	0.979302	1.03814	1.0327	1.02205	1.09403		1.01733	0.00899909			1.27497	1.16581	1.39029	1.09988	1.12925	1.15034	1.12192	1.12396	1.08753	1.19484	1.17203	1.2424		1.17944	0.0250086		1.05986	0.996155	1.05645	0.992784	1.05547	1.02266	0.992661	1.12522	1.04394	1.02505	1.08766
5.40643	1.01155	1.01862	0.970173	1.03595	0.979796	0.976662	0.989178	1.00114	1.00122	1.04524	1.08045	0.977084	1.03558	1.03212	1.01957	1.091		1.01658	0.00897669			1.27185	1.16708	1.3923	1.09933	1.1302	1.15198	1.12983	1.12043	1.09004	1.19475	1.17277	1.23885		1.17995	0.0248234		1.05396	0.995846	1.05481	0.991101	1.05446	1.02119	0.992265	1.12511	1.03915	1.0247	1.0883
5.41447	1.00741	1.02188	0.96651	1.03868	0.981622	0.979993	0.989479	1.00212	0.99958	1.04438	1.08062	0.981272	1.03948	1.02971	1.03004	1.09584		1.01804	0.00916235			1.2693	1.16952	1.39704	1.0991	1.12931	1.15487	1.12794	1.12013	1.08932	1.19439	1.17487	1.24169		1.18062	0.0251494		1.05311	0.998744	1.05377	0.99056	1.05622	1.02327	0.993722	1.12413	1.03882	1.02287	1.08621
5.4225	1.0067	1.02219	0.970501	1.04048	0.980471	0.976698	0.988799	1.00247	1.00237	1.04689	1.07789	0.976691	1.0353	1.03373	1.02337	1.09219		1.0173	0.00902764			1.27315	1.16547	1.39594	1.0991	1.13126	1.15483	1.12702	1.12133	1.09106	1.19312	1.17484	1.23931		1.18054	0.0250676		1.05968	0.995936	1.05795	0.992393	1.05678	1.02141	0.992878	1.12783	1.04202	1.02522	1.08649
5.43053	1.00851	1.01943	0.967369	1.03788	0.981476	0.977962	0.987854	0.999055	0.998854	1.04618	1.07754	0.977132	1.03659	1.0335	1.02513	1.08834		1.01642	0.00893902			1.27506	1.17444	1.39169	1.10038	1.12933	1.15052	1.12775	1.11787	1.08654	1.19319	1.17111	1.23634		1.17952	0.0249859		1.05843	0.994818	1.05764	0.989173	1.05585	1.0218	0.99227	1.12685	1.03814	1.02197	1.08665
5.43857	1.00813	1.02324	0.968404	1.03854	0.97461	0.97496	0.984999	1.00088	0.998287	1.04555	1.08167	0.978827	1.03829	1.03215	1.03332	1.09772		1.01747	0.00958639			1.26848	1.16765	1.3966	1.10128	1.12599	1.15104	1.12787	1.12043	1.08968	1.1935	1.17152	1.23939		1.17945	0.0250833		1.05719	0.992785	1.05344	0.989623	1.05205	1.02269	0.990725	1.12508	1.0371	1.02276	1.0862
5.4466	1.01012	1.0187	0.971102	1.03659	0.978988	0.973804	0.98869	1.00192	1.00027	1.04683	1.07778	0.980328	1.0385	1.02813	1.02649	1.09299		1.01695	0.00902311			1.26925	1.16763	1.39412	1.10089	1.12901	1.15836	1.12803	1.11787	1.08554	1.19194	1.17257	1.23855		1.17948	0.0249844		1.05819	0.99758	1.05405	0.989683	1.0555	1.02479	0.991558	1.1265	1.03785	1.02286	1.08859
5.45463	1.00916	1.01885	0.967949	1.04046	0.982386	0.973256	0.987041	0.999183	0.996915	1.04583	1.08138	0.980307	1.03717	1.03234	1.02336	1.09031		1.01662	0.00915813			1.27299	1.1699	1.39294	1.09943	1.1306	1.159	1.12644	1.12167	1.08624	1.1912	1.16823	1.23868		1.17978	0.0249596		1.06323	0.996642	1.05752	0.991301	1.05406	1.02308	0.98884	1.13026	1.03887	1.02205	1.08425
5.46267	1.00916	1.01873	0.967152	1.03978	0.978339	0.977106	0.98586	0.998188	0.995057	1.04356	1.08166	0.978989	1.04021	1.03667	1.01994	1.09313		1.01647	0.0093577			1.27269	1.16988	1.39631	1.10153	1.13204	1.16078	1.12665	1.11608	1.08678	1.18942	1.17209	1.23438		1.17988	0.0250819		1.05719	0.995905	1.05385	0.991147	1.05405	1.02264	0.992215	1.13054	1.03571	1.02541	1.08621
5.4707	1.00902	1.02268	0.968961	1.04391	0.981644	0.977971	0.987367	1.00048	0.993317	1.04248	1.07892	0.981735	1.03977	1.03416	1.00115	1.05702		1.01379	0.00812409			1.27249	1.16676	1.39597	1.10323	1.13296	1.15492	1.1286	1.12301	1.08668	1.19318	1.17057	1.23888		1.1806	0.0249897		1.06405	0.996577	1.05833	0.991552	1.05797	1.02287	0.992191	1.12641	1.03757	1.01989	1.08584
5.47873	1.009	1.02168	0.968157	1.03827	0.982232	0.981117	0.991571	1.00097	0.997971	1.04507	1.08217	0.979156	1.03886	1.03401	1.02212	1.08887		1.01758	0.00892237			1.27418	1.17348	1.39605	1.10029	1.13121	1.15688	1.13254	1.12148	1.08865	1.19183	1.17025	1.23692		1.18115	0.0249754		1.05685	0.997152	1.05718	0.991086	1.05659	1.02313	0.992269	1.11342	1.02978	1.01202	1.07595
5.48677	1.00961	1.02062	0.967952	1.03867	0.980437	0.977143	0.988891	1.00083	0.998697	1.04592	1.08006	0.978062	1.0398	1.03303	1.02147	1.08537		1.01666	0.00890992			1.27502	1.16823	1.39686	1.10133	1.13194	1.15295	1.12839	1.12137	1.08821	1.1929	1.17135	1.24022		1.18073	0.0251984		1.06131	0.995875	1.05807	0.993329	1.05537	1.02536	0.994838	1.12696	1.03944	1.02269	1.08531
5.4948	1.00603	1.01857	0.966884	1.03837	0.977157	0.974792	0.987004	0.997544	0.998466	1.04595	1.08158	0.977035	1.03781	1.03163	1.02031	1.08892		1.0155	0.00923806			1.27128	1.16906	1.39747	1.10096	1.12826	1.15333	1.12284	1.12731	1.08892	1.19204	1.16643	1.23742		1.17961	0.0251273		1.05909	0.997359	1.0558	0.991985	1.05534	1.02397	0.995657	1.12904	1.03572	1.02486	1.08515
5.50283	1.00816	1.01798	0.967564	1.03785	0.976166	0.979173	0.980438	0.997859	0.998618	1.04647	1.08325	0.97918	1.04073	1.03561	1.02246	1.08962		1.01632	0.00935217			1.26965	1.16866	1.39777	1.09931	1.12942	1.15461	1.13117	1.1234	1.08874	1.18956	1.1706	1.23729		1.18002	0.0250273		1.05901	0.995726	1.05695	0.991869	1.05678	1.01933	0.989141	1.12695	1.03765	1.02003	1.08598
5.51087	1.00753	1.01839	0.965121	1.04043	0.976736	0.974746	0.984567	0.999595	0.999681	1.04731	1.0847	0.979342	1.04027	1.03302	1.02652	1.0842		1.01639	0.00928987			1.27079	1.17022	1.39746	1.09741	1.13223	1.154	1.12572	1.12754	1.08733	1.19341	1.17076	1.23495		1.18015	0.0250719		1.06149	0.994935	1.05721	0.991728	1.05529	1.02163	0.992161	1.12954	1.03665	1.02349	1.08724
5.5189	1.00896	1.01918	0.966128	1.03621	0.980543	0.975152	0.986446	1.00163	0.999735	1.04754	1.08281	0.980861	1.04244	1.03246	1.02448	1.09167		1.01727	0.00927835			1.27018	1.16666	1.39432	1.10147	1.13339	1.15955	1.12473	1.12265	1.08709	1.19315	1.1717	1.23676		1.18014	0.0248394		1.06385	0.997305	1.05768	0.991284	1.05774	1.02429	0.990511	1.13077	1.03971	1.02064	1.08825
5.52693	1.00943	1.02161	0.967695	1.0384	0.976817	0.975724	0.981581	1.00041	0.999926	1.05275	1.08117	0.978122	1.04037	1.03659	1.02456	1.09355		1.01742	0.0095433			1.27191	1.16661	1.39269	1.09886	1.1266	1.15111	1.12814	1.12021	1.08939	1.19437	1.17148	1.23684		1.17902	0.0249402		1.06774	0.999346	1.05743	0.992334	1.05973	1.02422	0.99381	1.13167	1.04251	1.01878	1.08812
5.53497	1.00722	1.01823	0.96436	1.0342	0.982508	0.976143	0.987205	1.00069	0.998263	1.04763	1.07939	0.976601	1.03861	1.03475	1.02597	1.09024		1.01638	0.00917685			1.27122	1.16722	1.39779	1.1021	1.13224	1.15621	1.12745	1.12086	1.08815	1.1963	1.1742	1.23734		1.18092	0.0250913		1.05942	0.996272	1.05496	0.991692	1.0561	1.02503	0.994186	1.13668	1.04064	1.02513	1.08882
5.543	1.01128	1.02361	0.966163	1.03926	0.986134	0.979869	0.991735	1.00098	1.00266	1.0495	1.07967	0.975604	1.03646	1.03322	1.02582	1.09062		1.01829	0.00899053			1.27457	1.16717	1.39281	1.1001	1.13067	1.15636	1.12988	1.12433	1.08779	1.19267	1.17193	1.24041		1.18072	0.024887		1.05887	0.997508	1.05504	0.991709	1.0544	1.0248	0.99382	1.12854	1.04244	1.02517	1.09404
5.55103	1.00795	1.02037	0.964578	1.04297	0.979671	0.973738	0.980126	0.999293	0.9962	1.04829	1.08193	0.975755	1.04051	1.03262	1.02338	1.08479		1.01576	0.0093965			1.27191	1.16903	1.39231	1.09862	1.12916	1.15914	1.13129	1.12012	1.0888	1.19292	1.17258	1.23716		1.18025	0.0247793		1.06027	0.995968	1.05405	0.987733	1.05518	1.02491	0.994962	1.13537	1.03992	1.02516	1.08808
5.55907	1.01033	1.01951	0.966504	1.03887	0.981185	0.975856	0.98672	1.00036	0.995395	1.04985	1.08336	0.977995	1.03988	1.03367	1.02141	1.08571		1.01666	0.00918772			1.27339	1.17054	1.39451	1.09676	1.12806	1.15575	1.13032	1.12417	1.08733	1.19164	1.17028	1.23493		1.17981	0.0249942		1.06044	0.995941	1.05804	0.990111	1.05434	1.02335	0.991688	1.13085	1.0393	1.02024	1.08922
5.5671	1.0102	1.01947	0.968214	1.03861	0.982546	0.981898	0.987739	1.00088	0.998587	1.04726	1.08371	0.976029	1.03889	1.03923	1.02359	1.09062		1.01797	0.00918337			1.27526	1.17607	1.39169	1.09737	1.13307	1.15684	1.12654	1.13064	1.08431	1.19288	1.16642	1.23514		1.18052	0.0248185		1.06148	0.994529	1.05602	0.990802	1.05581	1.02045	0.994182	1.12973	1.03858	1.02514	1.0897
5.57513	1.0109	1.02248	0.96296	1.03911	0.979283	0.97851	0.984882	1.00011	0.997186	1.04729	1.0838	0.982819	1.04268	1.03436	1.02231	1.07927		1.01675	0.00901491			1.27088	1.16797	1.39362	1.09568	1.12637	1.15402	1.12999	1.12489	1.0857	1.19034	1.16881	1.23608		1.1787	0.0249978		1.06312	0.994608	1.05664	0.991275	1.05593	1.02391	0.99493	1.13528	1.0425	1.02457	1.08733
5.58317	1.00975	1.02082	0.96491	1.0353	0.981237	0.977387	0.987312	0.999928	0.999696	1.04908	1.08435	0.976973	1.0392	1.0363	1.0241	1.08815		1.01716	0.00926062			1.2722	1.17134	1.39108	1.10077	1.1292	1.15463	1.12637	1.12147	1.08834	1.19586	1.1688	1.23851		1.17988	0.0247919		1.06743	0.998428	1.05928	0.9936	1.05903	1.02354	0.993327	1.13136	1.03998	1.02397	1.08883
5.5912	1.00767	1.01931	0.965379	1.03439	0.98037	0.974562	0.983458	0.998468	1.00058	1.04861	1.08215	0.978124	1.03723	1.03671	1.02364	1.08862		1.01621	0.0092773			1.27458	1.17056	1.39375	1.09881	1.13136	1.15385	1.12967	1.11994	1.08657	1.19413	1.17088	1.23272		1.17973	0.0249694		1.06245	0.99854	1.05339	0.98831	1.05767	1.02528	0.994462	1.13058	1.03691	1.02006	1.08684
5.59923	1.00727	1.02178	0.964522	1.04041	0.987059	0.978738	0.987458	1.00107	0.995859	1.04828	1.08125	0.976671	1.04081	1.03775	1.02382	1.08844		1.01757	0.00918086			1.27191	1.17149	1.39046	1.09835	1.13334	1.15624	1.12923	1.12464	1.08743	1.19179	1.16872	1.23535		1.17991	0.0245818		1.06236	0.998397	1.05995	0.992709	1.05599	1.02185	0.995986	1.13707	1.04082	1.02311	1.09038
5.60727	1.00575	1.02011	0.967347	1.03884	0.981414	0.977464	0.984695	0.997557	0.994747	1.04964	1.07982	0.977591	1.03965	1.03465	1.02159	1.08849		1.01621	0.00920519			1.27577	1.17366	1.39388	1.09895	1.12962	1.15425	1.13488	1.11995	1.09	1.19419	1.17127	1.23562		1.181	0.0248978		1.0639	0.99996	1.05967	0.988918	1.05468	1.02023	0.990178	1.1384	1.03899	1.02139	1.09128
5.6153	1.00787	1.01556	0.962287	1.03403	0.981792	0.980813	0.987392	0.999078	0.999516	1.05204	1.08467	0.979452	1.04331	1.03524	1.02766	1.09395		1.01779	0.00950632			1.27657	1.17289	1.39217	1.09906	1.1286	1.15876	1.12982	1.12227	1.08626	1.19348	1.17069	1.23438		1.18041	0.0249084		1.06386	0.996613	1.05865	0.987275	1.05732	1.02242	0.992669	1.13258	1.04009	1.02157	1.08855
5.62333	1.00687	1.02097	0.968863	1.04032	0.977675	0.973529	0.982349	0.996223	0.995919	1.04996	1.0787	0.97618	1.03643	1.0335	1.02694	1.09144		1.01599	0.00942628			1.27462	1.17141	1.39427	1.10189	1.13051	1.15407	1.13289	1.12111	1.08789	1.19169	1.1687	1.2368		1.18049	0.0248963		1.06795	0.999371	1.05868	0.992763	1.05887	1.02175	0.992416	1.13517	1.04271	1.02168	1.09089
5.63137	1.00862	1.01785	0.962526	1.03504	0.980832	0.980076	0.984899	0.996833	0.999712	1.05008	1.07587	0.97616	1.0374	1.03619	1.02871	1.0868		1.0161	0.00907832			1.2749	1.17344	1.38988	1.09556	1.12835	1.15314	1.13217	1.12378	1.08977	1.19407	1.17467	1.23612		1.18049	0.0247077		1.06033	0.994758	1.05386	0.986796	1.05449	1.0222	0.992238	1.14116	1.03984	1.02148	1.09228
5.6394	1.00637	1.01593	0.963804	1.03659	0.983828	0.979096	0.985799	0.998649	0.997909	1.05265	1.08317	0.979118	1.03994	1.03536	1.02273	1.09387		1.01718	0.00944935			1.27173	1.17221	1.38995	1.09678	1.13458	1.15967	1.13035	1.12542	1.08791	1.19379	1.16993	1.23502		1.18061	0.0244945		1.06282	0.995173	1.05582	0.985886	1.05326	1.02122	0.993643	1.1374	1.03784	1.01965	1.09348
5.64743	1.00963	1.01956	0.966069	1.04086	0.97895	0.973	0.979383	0.99661	1.00139	1.05318	1.08614	0.978974	1.04012	1.03601	1.0287	1.09179		1.01752	0.00975541			1.27696	1.17345	1.39083	1.0974	1.13093	1.15372	1.13435	1.12553	1.09002	1.19567	1.17119	1.23914		1.1816	0.0247337		1.06725	0.9997	1.06023	0.990212	1.0555	1.01997	0.992585	1.13701	1.04406	1.02308	1.09203
5.65547	1.00652	1.01797	0.964655	1.03691	0.982156	0.97745	0.988152	0.999642	1.00053	1.05431	1.08562	0.981206	1.04093	1.03556	1.02755	1.08868		1.01799	0.00934587			1.27339	1.1715	1.39087	1.09907	1.12898	1.15295	1.12948	1.12332	1.08951	1.19193	1.17125	1.23453		1.17973	0.0246626		1.06895	0.997646	1.05952	0.989021	1.05862	1.01978	0.991934	1.13509	1.04324	1.02268	1.09097
5.6635	1.0068	1.01892	0.965627	1.03709	0.982238	0.977921	0.989036	0.997559	0.999371	1.0522	1.08479	0.976402	1.04137	1.03691	1.02862	1.09411		1.01806	0.00955077			1.27109	1.17193	1.38798	1.09783	1.13144	1.15693	1.13121	1.12606	1.08907	1.19453	1.17439	1.23482		1.18061	0.0243184		1.06907	0.99953	1.0593	0.990761	1.059	1.01916	0.989294	1.1365	1.03792	1.02248	1.0914
5.67153	1.00528	1.01896	0.963849	1.03631	0.986583	0.981399	0.990561	0.999492	1.00004	1.05336	1.08554	0.979183	1.04456	1.03529	1.02244	1.09209		1.01843	0.00935497			1.27623	1.16869	1.38955	1.09841	1.12855	1.15465	1.13125	1.12225	1.08971	1.19254	1.16702	1.23775		1.17972	0.0247363		1.06819	1.00176	1.05615	0.990273	1.05786	1.02077	0.993664	1.14075	1.0455	1.02632	1.09434
5.67957	1.00732	1.01842	0.967202	1.0365	0.985608	0.97775	0.987957	0.999186	0.998774	1.05397	1.08369	0.976863	1.039	1.03592	1.02201	1.08912		1.01745	0.00923423			1.27813	1.17029	1.38799	1.10009	1.13039	1.15298	1.13584	1.12141	1.08565	1.19585	1.16956	1.23714		1.18044	0.0246905		1.0732	1.00495	1.06282	0.990354	1.05979	1.02441	0.993594	1.13776	1.04294	1.02599	1.09267
5.6876	1.00716	1.01829	0.966543	1.03587	0.986644	0.982479	0.987367	0.999205	0.999388	1.05327	1.08549	0.977402	1.03926	1.03405	1.02701	1.09876		1.01864	0.00951374			1.27298	1.16725	1.38989	1.09966	1.12804	1.15642	1.13433	1.12338	1.08638	1.19469	1.17053	1.23783		1.18012	0.0246612		1.06962	1.00154	1.05984	0.992158	1.05767	1.02212	0.994076	1.13567	1.0397	1.02177	1.09033
5.69563	1.0042	1.01998	0.963418	1.0361	0.98193	0.97377	0.981797	0.997732	1.0005	1.05317	1.08658	0.977741	1.04094	1.03755	1.02976	1.092		1.01732	0.0097605			1.27624	1.16802	1.3909	1.09477	1.13602	1.1537	1.12844	1.12093	1.08724	1.19252	1.1699	1.23537		1.17951	0.024901		1.06899	1.00124	1.05782	0.990362	1.05721	1.02028	0.99383	1.13719	1.04147	1.02529	1.09445
5.70367	1.00899	1.02337	0.967823	1.03873	0.984796	0.977323	0.986295	0.99829	0.997514	1.05475	1.08269	0.972608	1.03634	1.03797	1.02262	1.09436		1.01778	0.00953264			1.27035	1.16657	1.39025	1.09821	1.12834	1.15382	1.128	1.12314	1.08997	1.19316	1.16801	1.23541		1.17877	0.0246189		1.0728	1.00036	1.06321	0.993188	1.06053	1.02555	0.990816	1.13897	1.04374	1.02395	1.09548
5.7117	1.00488	1.01887	0.964349	1.0391	0.982899	0.977211	0.986184	0.995572	0.998857	1.05583	1.08696	0.975915	1.03761	1.03749	1.02796	1.09607		1.01786	0.00982987			1.27424	1.17119	1.39028	1.0958	1.12814	1.15026	1.12776	1.12331	1.08807	1.19399	1.16983	1.23559		1.17904	0.0248649		1.06582	0.998217	1.05404	0.988437	1.05233	1.02561	0.992251	1.13732	1.04338	1.02058	1.09378
5.71973	1.00493	1.01875	0.964107	1.03776	0.987858	0.981414	0.988388	0.998632	1.00158	1.05526	1.08507	0.97505	1.03925	1.0364	1.03035	1.0933		1.01863	0.0094807			1.27364	1.1657	1.38993	1.09442	1.13351	1.15572	1.13033	1.12371	1.08832	1.19208	1.16774	1.23719		1.17936	0.0247287		1.06947	0.998248	1.05684	0.990056	1.05593	1.02416	0.993451	1.13948	1.04297	1.02543	1.09381
5.72777	1.00702	1.02265	0.968194	1.03737	0.983273	0.977773	0.984781	0.998101	0.998254	1.05502	1.08768	0.976307	1.04289	1.03898	1.01769	1.08603		1.01763	0.00943418			1.27453	1.16899	1.38976	1.09495	1.12864	1.15853	1.1308	1.11885	1.08828	1.19353	1.16867	1.2392		1.17956	0.0248899		1.06844	0.997778	1.05745	0.988252	1.05777	1.02383	0.991652	1.14044	1.04574	1.02451	1.09601
5.7358	1.00729	1.02012	0.966792	1.03694	0.984842	0.977932	0.982519	0.995851	0.998218	1.05653	1.08507	0.972525	1.04136	1.0386	1.0261	1.08929		1.0175	0.00959853			1.27107	1.16674	1.38969	1.09508	1.1288	1.15543	1.13531	1.1238	1.08665	1.194	1.16923	1.2316		1.17895	0.0245735		1.06829	1.00219	1.05771	0.98783	1.0589	1.02469	0.994493	1.13375	1.0429	1.01623	1.0967
5.74383	1.0068	1.01858	0.965839	1.03683	0.983563	0.973284	0.984969	0.995713	0.997449	1.05694	1.09043	0.978286	1.0445	1.04053	1.02892	1.09285		1.01847	0.00992972			1.27703	1.16622	1.38826	1.09689	1.13297	1.17197	1.13073	1.12145	1.08733	1.19404	1.16914	1.23606		1.18101	0.0246261		1.07039	0.999748	1.06244	0.99146	1.05715	1.02183	0.989533	1.13714	1.03962	1.02232	1.09308
5.75187	1.0064	1.02223	0.967074	1.03955	0.983917	0.973902	0.983882	0.996574	0.998795	1.05577	1.08527	0.972051	1.04107	1.03509	1.03295	1.09579		1.01815	0.00988929			1.27306	1.16799	1.38994	1.09424	1.12615	1.1466	1.13357	1.11766	1.08511	1.19167	1.16728	1.23364		1.17724	0.0249823		1.07459	1.00221	1.06296	0.989961	1.06033	1.02731	0.99119	1.1396	1.046	1.02006	1.09416
5.7599	1.00473	1.01822	0.96329	1.03419	0.985517	0.977452	0.98619	0.999148	0.996258	1.0569	1.08633	0.975628	1.04074	1.03517	1.02934	1.09353		1.01766	0.00970214			1.27333	1.17071	1.38703	1.09855	1.13517	1.15883	1.13609	1.12168	1.0861	1.19179	1.16284	1.23127		1.17945	0.0243018		1.07022	1.00104	1.06141	0.990901	1.05975	1.0226	0.98999	1.13766	1.04333	1.02407	1.09378
5.76793	1.00717	1.01935	0.966449	1.03783	0.984602	0.977312	0.98459	0.997903	0.996066	1.05543	1.08553	0.976661	1.04267	1.03846	1.02966	1.10059		1.01877	0.00991366			1.2804	1.17087	1.38874	1.09989	1.13221	1.15474	1.1356	1.12139	1.08725	1.19331	1.16828	1.23463		1.18061	0.0246768		1.07068	1.00353	1.05844	0.992895	1.05698	1.02473	0.992213	1.1426	1.04356	1.02361	1.09638
5.77597	1.00638	1.01872	0.965959	1.03782	0.98584	0.978569	0.988784	0.998743	0.995426	1.0577	1.08375	0.976384	1.04087	1.03639	1.03354	1.09658		1.01884	0.0096734			1.27476	1.16875	1.38723	1.09543	1.13157	1.15374	1.13422	1.12484	1.08827	1.19377	1.16768	1.23527		1.17963	0.0244926		1.07404	1.00072	1.06186	0.992654	1.05968	1.02506	0.992865	1.14291	1.0448	1.0229	1.09425
5.784	1.00922	1.01659	0.965346	1.03667	0.984061	0.98214	0.98723	0.99782	0.999009	1.05703	1.08398	0.975596	1.04022	1.03511	1.02521	1.08914		1.01777	0.00933751			1.27512	1.17057	1.38677	1.09748	1.12989	1.15441	1.13223	1.12701	1.08605	1.19058	1.16946	1.22984		1.17912	0.0243834		1.07267	1.00042	1.06171	0.989521	1.05731	1.02182	0.994401	1.14392	1.04171	1.02201	1.09743
5.79203	1.00721	1.01656	0.966356	1.03397	0.985054	0.978924	0.983305	0.995873	0.998901	1.05621	1.08519	0.976788	1.04534	1.03684	1.0268	1.09324		1.01791	0.00962322			1.27685	1.1658	1.38827	1.09393	1.13295	1.15457	1.13119	1.12687	1.08622	1.19076	1.16624	1.23429		1.17899	0.0246902		1.07301	1.00586	1.06046	0.986604	1.05879	1.02204	0.99204	1.14003	1.04141	1.01787	1.09116
5.80007	1.00871	1.01564	0.965784	1.0369	0.987771	0.980079	0.987135	0.998832	0.998876	1.05632	1.08524	0.974766	1.03868	1.03959	1.02858	1.09212		1.01844	0.00947996			1.27707	1.16577	1.38675	1.09457	1.12954	1.15183	1.13251	1.12181	1.0827	1.19259	1.16256	1.22819		1.17716	0.0247416		1.074	1.00607	1.06116	0.988276	1.06246	1.02153	0.988567	1.14146	1.04339	1.01711	1.09499
5.8081	1.00835	1.02094	0.965384	1.03865	0.980687	0.976159	0.984566	0.995992	0.99743	1.05364	1.08641	0.980853	1.04491	1.03741	1.02667	1.0927		1.01817	0.00969344			1.27657	1.16753	1.38143	1.09222	1.12914	1.15422	1.13392	1.12151	1.08704	1.19101	1.16743	1.23498		1.17808	0.0243795		1.07189	1.00221	1.05805	0.988355	1.0579	1.02422	0.990476	1.14583	1.04274	1.01883	1.09521
5.81613	1.00665	1.0174	0.967652	1.03797	0.988982	0.982258	0.991079	0.99925	0.99861	1.0587	1.08932	0.97857	1.04077	1.03834	1.02909	1.09454		1.01995	0.00952726			1.27646	1.17208	1.38591	1.0932	1.12918	1.15515	1.13114	1.1199	1.0852	1.19449	1.16731	1.22977		1.17832	0.0246651		1.07621	1.00319	1.06134	0.987302	1.06186	1.02351	0.990087	1.14101	1.04102	1.02166	1.09534
5.82417	1.00661	1.01767	0.968915	1.03282	0.984542	0.974969	0.98584	0.996134	0.994294	1.05542	1.08573	0.978621	1.04479	1.03847	1.0304	1.09413		1.01808	0.00966712			1.2803	1.16484	1.38396	1.0956	1.12819	1.1595	1.13203	1.12424	1.08336	1.19389	1.16685	1.23377		1.17888	0.0246346		1.07574	1.00345	1.06219	0.989739	1.06076	1.01868	0.987702	1.13846	1.04376	1.02124	1.0964
5.8322	1.0072	1.01813	0.967035	1.03864	0.984779	0.974263	0.987406	0.996374	0.998668	1.0557	1.09053	0.978447	1.04365	1.03828	1.02974	1.09822		1.01919	0.00995811			1.27823	1.1773	1.38357	1.09429	1.13017	1.15552	1.13637	1.12129	1.08413	1.19475	1.16766	1.23344		1.17973	0.0245091		1.07508	1.0057	1.06161	0.991145	1.05971	1.02022	0.991061	1.1477	1.04233	1.01791	1.0964
5.84023	1.00574	1.01805	0.968387	1.0348	0.987478	0.979021	0.986647	0.998865	0.999235	1.05711	1.0861	0.973882	1.04004	1.03672	1.03119	1.09666		1.01875	0.00964961			1.27497	1.1697	1.38551	1.09517	1.13001	1.15491	1.13213	1.12331	1.08667	1.19105	1.17026	1.2327		1.17887	0.0244454		1.07952	1.0064	1.06295	0.990756	1.06091	1.02273	0.990533	1.14993	1.0458	1.01952	1.09764
5.84827	1.00726	1.02202	0.965647	1.03481	0.987953	0.977529	0.986354	0.995279	0.996793	1.05435	1.08555	0.978003	1.04163	1.04066	1.02906	1.08891		1.01824	0.00943588			1.27764	1.16866	1.38824	1.09283	1.13418	1.15195	1.12785	1.11845	1.08713	1.19324	1.16518	1.2355		1.1784	0.0249372		1.07241	1.00355	1.05976	0.990703	1.05721	1.02189	0.990546	1.14482	1.04307	1.02165	1.09918
5.8563	1.00311	1.01651	0.963609	1.03678	0.989735	0.978831	0.983986	0.999023	0.999043	1.05751	1.08723	0.979505	1.04182	1.03861	1.02539	1.09472		1.01846	0.00968473			1.27763	1.16968	1.38425	1.09527	1.13241	1.15351	1.13175	1.12467	1.08678	1.18988	1.17171	1.22916		1.17889	0.0243319		1.0736	1.00303	1.06019	0.987817	1.06018	1.02354	0.988324	1.14484	1.04267	1.0183	1.09674
5.86433	1.00452	1.0185	0.964644	1.03359	0.989238	0.977761	0.990956	0.997938	0.994722	1.05679	1.08735	0.978717	1.04398	1.03626	1.03253	1.09809		1.0191	0.00976078			1.27575	1.1646	1.38595	1.09443	1.13045	1.15446	1.13678	1.12303	1.08513	1.19356	1.16883	1.22994		1.17858	0.0244864		1.07757	1.00893	1.06402	0.989258	1.06003	1.02404	0.991221	1.14882	1.04719	1.02064	1.098
5.87237	1.00663	1.0191	0.964628	1.03547	0.989358	0.980053	0.98541	0.997831	0.996733	1.05633	1.08672	0.980151	1.04335	1.03755	1.03345	1.09537		1.01926	0.00964249			1.27912	1.16655	1.38658	1.09291	1.13047	1.15153	1.13248	1.12033	1.08433	1.19365	1.17048	1.23165		1.17834	0.0248341		1.07449	1.00494	1.0613	0.987516	1.05761	1.01549	0.990706	1.15239	1.04774	1.0212	1.09845
5.8804	1.00769	1.0191	0.967427	1.03184	0.988441	0.976302	0.986457	0.999072	0.998648	1.05797	1.0851	0.979198	1.04192	1.03844	1.02987	1.09197		1.01872	0.00944192			1.27599	1.16821	1.38231	1.09178	1.13201	1.15916	1.13579	1.12653	1.08556	1.1948	1.16777	1.23443		1.17953	0.0242871		1.07656	1.00394	1.06668	0.989908	1.06134	1.02297	0.98814	1.14687	1.04638	1.021	1.10185
5.88843	1.00897	1.02263	0.971734	1.03835	0.989897	0.974058	0.986783	0.999034	0.996236	1.05729	1.08714	0.977392	1.0444	1.03688	1.03637	1.10001		1.02045	0.00982751			1.27782	1.17175	1.3848	1.09142	1.13014	1.15304	1.13295	1.12503	1.08641	1.19288	1.16782	1.23186		1.17883	0.0245598		1.07604	1.00099	1.06055	0.98917	1.05906	1.0199	0.993015	1.14707	1.04336	1.02023	1.10053
5.89647	1.01017	1.01888	0.969103	1.03549	0.990333	0.977173	0.989174	0.998851	0.999087	1.05838	1.08853	0.975345	1.04071	1.0392	1.03378	1.09806		1.02014	0.00972987			1.277	1.16976	1.38555	1.09042	1.12969	1.15004	1.14005	1.12316	1.08673	1.19341	1.16852	1.23392		1.17902	0.0246107		1.07596	1.003	1.06523	0.991821	1.05989	1.02033	0.990484	1.15105	1.04321	1.01956	1.09882
5.9045	1.01057	1.01745	0.962971	1.03239	0.988568	0.977496	0.983472	0.997616	0.996897	1.0579	1.08321	0.974796	1.0432	1.03826	1.03393	1.09272		1.01822	0.00967024			1.27754	1.1708	1.38506	1.09155	1.12771	1.15034	1.1391	1.12306	1.08733	1.19367	1.16827	1.23067		1.17876	0.0245353		1.07756	1.00223	1.06163	0.98926	1.05828	1.02298	0.990814	1.14956	1.04674	1.01936	1.10043
5.91253	1.00961	1.01724	0.964574	1.0342	0.992159	0.978744	0.990995	1.001	0.996143	1.05779	1.09137	0.977925	1.04219	1.04121	1.03567	1.10208		1.02081	0.00996761			1.27468	1.16648	1.38349	1.09443	1.12748	1.14876	1.13454	1.12032	1.08171	1.19162	1.16626	1.22664		1.17637	0.0245014		1.07466	0.999616	1.06132	0.987388	1.05998	1.02525	0.992492	1.1451	1.04378	1.01703	1.09549
5.92057	1.00877	1.01422	0.964803	1.02824	0.985813	0.976111	0.981566	0.994934	0.996096	1.05763	1.09109	0.975294	1.04263	1.03739	1.03358	1.09653		1.01779	0.0100605			1.27644	1.16974	1.38583	1.09543	1.12784	1.15689	1.13418	1.12328	1.08598	1.19325	1.16858	1.23245		1.17916	0.0245226		1.07485	1.00132	1.06469	0.98846	1.05904	1.02553	0.99085	1.14798	1.04442	1.02229	1.09961
5.9286	1.00963	1.01884	0.965639	1.03235	0.986424	0.9755	0.983409	0.99627	0.998249	1.05956	1.08661	0.977155	1.04365	1.03807	1.02907	1.09682		1.01858	0.00986846			1.27399	1.169	1.38375	1.09419	1.13485	1.15384	1.13469	1.12602	1.08404	1.19414	1.16299	1.22894		1.17837	0.0242435		1.07919	1.00418	1.06355	0.990181	1.06071	1.01843	0.992452	1.14927	1.04318	1.01567	1.09713
5.93663	1.00714	1.01839	0.965257	1.03588	0.991951	0.977982	0.987227	0.997719	0.993017	1.05696	1.08816	0.975258	1.0401	1.03874	1.0313	1.09377		1.01868	0.00969921			1.2793	1.16984	1.38543	1.09271	1.12954	1.15766	1.13409	1.12125	1.08789	1.19416	1.1658	1.23161		1.17911	0.024608		1.0774	1.00374	1.06449	0.989672	1.06115	1.02364	0.989855	1.1521	1.04194	1.01801	1.09375
5.94467	1.00867	1.01734	0.967583	1.03679	0.994523	0.974393	0.989297	0.999511	0.997777	1.06234	1.08801	0.97676	1.04208	1.03794	1.03057	1.09023		1.01961	0.00955002			1.27795	1.17248	1.38539	1.0901	1.13201	1.15442	1.13255	1.12286	1.08597	1.19479	1.16692	1.23081		1.17885	0.0246476		1.07512	1.00202	1.06433	0.986654	1.05835	1.02416	0.994428	1.14775	1.04368	1.01894	1.09698
5.9527	1.00858	1.0163	0.966782	1.03368	0.990931	0.977381	0.985273	0.997945	0.995552	1.05906	1.09136	0.975855	1.04603	1.03887	1.03258	1.09511		1.01946	0.00989757			1.27947	1.17053	1.38482	1.0923	1.12718	1.15	1.13612	1.12208	1.08654	1.19229	1.16675	1.23359		1.17847	0.0246948		1.07896	1.00222	1.06575	0.989478	1.06217	1.02362	0.992617	1.14965	1.04545	1.01851	1.09911
5.96073	1.00859	1.0166	0.967859	1.03289	0.989588	0.97356	0.984363	0.996784	0.993321	1.06107	1.08839	0.975145	1.04049	1.0371	1.02883	1.09205		1.01791	0.00977153			1.27797	1.17084	1.38517	1.09672	1.1255	1.14875	1.13339	1.11896	1.08772	1.19542	1.16792	1.23316		1.17846	0.0246574		1.07891	1.00483	1.06812	0.986856	1.06231	1.02497	0.992918	1.15348	1.04466	1.01643	1.09985
5.96877	1.0066	1.01607	0.965029	1.03309	0.992926	0.977308	0.987897	0.997729	0.996775	1.05932	1.08336	0.974192	1.04481	1.04039	1.02776	1.09347		1.01855	0.00960134			1.2773	1.17246	1.38449	1.0918	1.12995	1.15281	1.1337	1.12554	1.0861	1.19384	1.16517	1.23068		1.17866	0.0245026		1.07633	0.99967	1.06567	0.988231	1.06258	1.02322	0.994088	1.15573	1.04559	1.0192	1.09769
5.9768	1.00731	1.02004	0.965576	1.03665	0.990422	0.977741	0.988035	0.998271	0.997992	1.05685	1.08943	0.975201	1.04602	1.03821	1.03178	1.09608		1.01973	0.00982319			1.2798	1.16728	1.38263	1.09018	1.12739	1.15106	1.13156	1.12061	1.08702	1.19608	1.16828	1.22841		1.17752	0.0246245		1.0756	1.00092	1.06767	0.986874	1.05914	1.02263	0.989863	1.14924	1.04116	1.01828	1.09767
5.98483	1.00877	1.01872	0.968109	1.03443	0.987642	0.975409	0.985522	0.997856	1.00014	1.05729	1.08784	0.973127	1.04059	1.04176	1.02876	1.0949		1.0188	0.00976553			1.27939	1.16884	1.38187	1.09333	1.13088	1.16002	1.13617	1.12558	1.08793	1.19401	1.16321	1.23115		1.17937	0.0242344		1.08295	1.00001	1.06939	0.989262	1.06261	1.02538	0.991455	1.15523	1.04613	1.01965	1.09733
5.99287	1.00929	1.01845	0.965424	1.03531	0.990198	0.977404	0.988106	1.0003	0.995759	1.06011	1.08778	0.973356	1.04336	1.04159	1.03298	1.10129		1.02004	0.0100397			1.27559	1.16787	1.38382	1.09451	1.13068	1.15419	1.13338	1.12366	1.08612	1.19589	1.16784	1.22986		1.17862	0.0243488		1.07765	1.0015	1.06809	0.989147	1.0619	1.02374	0.993006	1.15959	1.04685	1.01983	1.10137
6.0009	1.01023	1.01895	0.963279	1.03983	0.98804	0.976098	0.983075	0.995657	0.996401	1.06101	1.08797	0.975198	1.04177	1.04205	1.03378	1.09723		1.01941	0.0101215			1.27724	1.16522	1.38287	1.09236	1.13078	1.15237	1.13735	1.12403	1.08766	1.19507	1.16743	1.23446		1.17891	0.0243883		1.07889	0.999119	1.06738	0.985275	1.06125	1.0251	0.991897	1.15632	1.04901	1.02256	1.09852
6.00893	1.00622	1.01711	0.968319	1.03432	0.987692	0.975398	0.982775	0.993675	0.999994	1.06329	1.08651	0.970025	1.04142	1.03793	1.0299	1.09641		1.01819	0.0100094			1.27523	1.17105	1.38239	1.09525	1.13129	1.15406	1.13179	1.1209	1.08624	1.19569	1.16604	1.23304		1.17858	0.0243361		1.07963	1.002	1.06764	0.987682	1.06254	1.02294	0.989129	1.15718	1.04906	1.02251	1.10385
6.01697	1.00717	1.0171	0.966055	1.03938	0.996497	0.981482	0.992358	0.998756	0.995253	1.05917	1.08732	0.975376	1.0479	1.04142	1.03123	1.09487		1.02071	0.00964822			1.27646	1.17369	1.38104	1.09215	1.1246	1.15157	1.13268	1.12276	1.08376	1.1938	1.16435	1.22804		1.17708	0.024429		1.0788	0.9984	1.06694	0.986648	1.06104	1.02449	0.993465	1.16013	1.04888	1.02114	1.10072
6.025	1.00681	1.01784	0.964889	1.03475	0.993396	0.975776	0.989082	0.997109	0.996055	1.06052	1.08966	0.974827	1.04805	1.04116	1.03417	1.09449		1.01991	0.00993103			1.27067	1.16742	1.38131	1.09291	1.12723	1.15903	1.13132	1.12248	1.08404	1.19655	1.16562	1.23052		1.17742	0.0242388		1.07547	0.998805	1.06696	0.988502	1.06141	1.0263	0.992156	1.16133	1.04246	1.02002	1.10126
6.03303	1.00567	1.01901	0.966636	1.0376	0.993909	0.976713	0.991203	0.99761	0.99512	1.05955	1.09294	0.974412	1.04489	1.041	1.03	1.09987		1.02038	0.0100764			1.27601	1.16732	1.38721	1.09135	1.12831	1.15681	1.13501	1.12229	1.088	1.19599	1.16708	1.23368		1.17909	0.0246948		1.08085	1.00378	1.06967	0.987861	1.06441	1.02609	0.991714	1.15544	1.04775	1.02019	1.10092
6.04107	1.00659	1.01523	0.96638	1.03304	0.990328	0.975649	0.984725	0.998025	0.997285	1.05994	1.09614	0.97807	1.04615	1.0416	1.02766	1.09224		1.01931	0.00998099			1.2785	1.16889	1.38357	1.09121	1.12734	1.15638	1.13545	1.12648	1.08709	1.19553	1.16795	1.23101		1.17912	0.0244546		1.08133	1.00233	1.06971	0.989863	1.06355	1.02591	0.990786	1.15707	1.04193	1.02146	1.09863
6.0491	1.00778	1.01417	0.970292	1.0345	0.992775	0.97577	0.98553	0.994866	0.998969	1.06258	1.08589	0.974122	1.04216	1.04119	1.03254	1.1017		1.01968	0.00996938			1.27463	1.16819	1.38197	1.09146	1.13268	1.15544	1.14046	1.12192	1.08653	1.19069	1.16519	1.23032		1.17829	0.0241635		1.08659	1.00771	1.07053	0.989084	1.06615	1.02388	0.991287	1.15823	1.04553	1.0214	1.10049
6.05713	1.00748	1.01919	0.966556	1.03438	0.994525	0.979112	0.988932	0.997745	0.998847	1.05828	1.08975	0.974892	1.04456	1.04232	1.03339	1.10332		1.02083	0.0100055			1.27842	1.1717	1.38436	1.09249	1.12829	1.15057	1.13744	1.12354	1.08722	1.19163	1.164	1.23091		1.17838	0.0245069		1.07886	1.00306	1.06635	0.985379	1.06312	1.02459	0.991156	1.15622	1.04466	1.01741	1.09768
6.06517	1.00672	1.01388	0.967748	1.0319	0.994982	0.975408	0.990699	0.997236	0.993388	1.05794	1.08783	0.973124	1.04326	1.03948	1.03183	1.10657		1.0195	0.0101186			1.28136	1.17088	1.3836	1.08758	1.12859	1.15712	1.1364	1.12015	1.0874	1.1951	1.16332	1.22997		1.17846	0.0247031		1.08081	1.00521	1.07049	0.991065	1.06421	1.02658	0.993484	1.16312	1.0485	1.02019	1.10213
6.0732	1.00943	1.0177	0.971272	1.03892	0.990407	0.977283	0.984999	0.996304	0.995646	1.06062	1.09075	0.975296	1.04417	1.04026	1.03013	1.1009		1.02025	0.0100468			1.27567	1.16884	1.38447	1.09635	1.12545	1.14858	1.13312	1.11971	1.08863	1.19487	1.16519	1.23095		1.17765	0.0244946		1.08038	1.0026	1.0687	0.98577	1.06382	1.02111	0.987173	1.15898	1.04924	1.0217	1.10417
6.08123	1.00431	1.01525	0.966009	1.03121	0.995725	0.979539	0.990848	0.99866	0.994163	1.06102	1.08538	0.973135	1.04593	1.04195	1.02954	1.10027		1.01956	0.00986341			1.27733	1.17234	1.38151	1.09034	1.12554	1.14944	1.13621	1.12545	1.08494	1.19485	1.16761	1.22672		1.17769	0.0243862		1.08158	1.00425	1.06791	0.988721	1.06415	1.02139	0.990923	1.15805	1.04336	1.01719	1.09995
6.08927	1.00668	1.01237	0.96912	1.03219	0.998057	0.979886	0.994875	0.999917	0.99618	1.06066	1.08974	0.97328	1.04494	1.04069	1.03375	1.09839		1.02067	0.0097347			1.2782	1.17088	1.38384	1.09231	1.1279	1.15665	1.13269	1.12299	1.08695	1.19532	1.16579	1.23081		1.1787	0.0245215		1.0809	1.00374	1.06717	0.989003	1.06263	1.02545	0.992303	1.15903	1.04602	1.01946	1.09888
6.0973	1.00988	1.01765	0.968826	1.03655	0.991547	0.977016	0.990367	0.996809	0.996313	1.06203	1.09028	0.972388	1.04355	1.0441	1.03532	1.10986		1.0214	0.0104123			1.27696	1.16823	1.38362	1.09307	1.13031	1.15143	1.13485	1.12504	1.08689	1.19179	1.16279	1.23045		1.17795	0.0243868		1.07991	1.00518	1.07051	0.990882	1.06384	1.02434	0.990768	1.1624	1.04608	1.02162	1.10069
6.10533	1.0074	1.01516	0.966247	1.03314	0.995574	0.977994	0.990497	0.99847	0.995054	1.06236	1.09014	0.972437	1.04549	1.04222	1.03008	1.10739		1.0206	0.0102903			1.28001	1.17244	1.38163	1.0893	1.1281	1.1544	1.13187	1.12467	1.08841	1.19682	1.16538	1.22783		1.1784	0.0244342		1.08346	1.00492	1.06831	0.988822	1.06724	1.02499	0.989668	1.16135	1.04893	1.0216	1.10466
6.11337	1.00889	1.01453	0.968809	1.0327	0.992934	0.972543	0.985789	0.994861	0.995549	1.06236	1.0923	0.976352	1.04556	1.04157	1.03458	1.10679		1.02038	0.0104302			1.27954	1.17562	1.38288	1.09008	1.12898	1.15367	1.13059	1.12218	1.08688	1.19297	1.16561	1.22964		1.17822	0.0245765		1.08118	1.00324	1.06716	0.986165	1.06292	1.02675	0.991812	1.16543	1.04583	1.01835	1.1024
6.1214	1.00804	1.01694	0.970421	1.0325	0.998421	0.97883	0.994066	0.996742	0.996303	1.06332	1.09206	0.974639	1.0473	1.04295	1.03458	1.10355		1.02192	0.0100488			1.28287	1.17091	1.38268	1.09016	1.12955	1.1569	1.14122	1.12154	1.08882	1.19589	1.16419	1.23062		1.17961	0.0244937		1.08164	1.00595	1.07153	0.989044	1.06534	1.02382	0.989074	1.16883	1.04611	1.0223	1.10234
6.12943	1.00791	1.01514	0.96561	1.03532	0.997337	0.976589	0.990022	0.997978	0.99629	1.06061	1.09111	0.972225	1.04815	1.04188	1.03201	1.10144		1.0206	0.0101523			1.27821	1.1685	1.38041	1.09182	1.12834	1.15315	1.13732	1.12408	1.08605	1.19557	1.16509	1.22672		1.17794	0.024227		1.0842	1.00805	1.0699	0.987027	1.06606	1.02749	0.991165	1.16294	1.05116	1.01989	1.10318
6.13747	1.01	1.01749	0.966865	1.03503	0.995728	0.980466	0.988414	0.995972	0.996268	1.06066	1.08571	0.96994	1.04402	1.04179	1.03049	1.10523		1.02025	0.0100724			1.27954	1.1686	1.38101	1.09491	1.12893	1.15567	1.13578	1.12549	1.08607	1.19266	1.16633	1.2295		1.17871	0.024217		1.08443	1.0026	1.07179	0.99088	1.06651	1.02576	0.992508	1.16164	1.04576	1.01871	1.09998
6.1455	1.00651	1.01641	0.968965	1.03851	0.996491	0.977406	0.989668	0.9968	0.99575	1.06398	1.09415	0.971589	1.04472	1.04525	1.03247	1.10161		1.02127	0.0102815			1.27735	1.17243	1.3827	1.09167	1.12881	1.15444	1.1384	1.12565	1.08722	1.19575	1.16738	1.22708		1.17907	0.0242472		1.08561	1.00038	1.06997	0.988946	1.06196	1.02741	0.993257	1.16181	1.04957	1.02059	1.10059
6.15353	1.00672	1.01832	0.969049	1.03726	0.995231	0.97517	0.990666	0.994552	0.995421	1.06198	1.09014	0.972352	1.04582	1.04153	1.03635	1.10637		1.02106	0.0103283			1.27724	1.17226	1.38276	1.08528	1.12729	1.15129	1.13777	1.1202	1.08535	1.19517	1.16594	1.22602		1.17721	0.0246143		1.08149	1.00263	1.07042	0.98996	1.06689	1.02818	0.992136	1.16865	1.04741	1.018	1.09902
6.16157	1.00602	1.01433	0.968186	1.03172	0.997493	0.974298	0.992658	0.997096	0.993084	1.05941	1.09115	0.971203	1.04861	1.04155	1.03611	1.11222		1.02095	0.0105421			1.27647	1.17117	1.38133	1.08569	1.13098	1.15891	1.13766	1.12251	1.08786	1.19508	1.1687	1.22847		1.17874	0.0242983		1.08385	1.00679	1.06785	0.988775	1.06597	1.02636	0.991335	1.16623	1.04533	1.01483	1.10273
6.1696	1.00911	1.01824	0.970373	1.03742	0.997777	0.973014	0.985815	0.994569	0.995094	1.06253	1.08662	0.97138	1.04667	1.04325	1.02897	1.10321		1.02025	0.010184			1.27935	1.16878	1.38188	1.0883	1.13221	1.15853	1.13593	1.11882	1.08561	1.19284	1.16681	1.22931		1.1782	0.0244997		1.0852	1.00564	1.07208	0.990317	1.0678	1.02572	0.991744	1.16396	1.0509	1.01877	1.10239
6.17763	1.00649	1.0158	0.971638	1.03832	0.998616	0.976301	0.991582	0.99651	0.993359	1.06101	1.09169	0.974526	1.04575	1.04258	1.03709	1.10842		1.02185	0.010293			1.27691	1.16881	1.38123	1.08621	1.12931	1.15232	1.13647	1.12624	1.08605	1.19565	1.16675	1.22901		1.17791	0.0243901		1.08559	1.00392	1.07028	0.988052	1.06389	1.02589	0.991636	1.16336	1.04625	1.02304	1.10005
6.18567	1.00888	1.01732	0.968432	1.03679	0.992042	0.973001	0.984123	0.994459	0.997209	1.06315	1.08842	0.972016	1.04937	1.04537	1.03243	1.10695		1.02062	0.0105244			1.28058	1.17563	1.38012	1.0886	1.13326	1.15661	1.13543	1.11869	1.08827	1.19505	1.16805	1.22773		1.179	0.0243189		1.08842	1.0044	1.06867	0.990366	1.065	1.02526	0.986938	1.1688	1.04769	1.02227	1.10323
6.1937	1.01186	1.01786	0.969006	1.03212	0.996104	0.970554	0.985769	0.995138	0.994005	1.06255	1.09972	0.971649	1.04928	1.04556	1.03794	1.11195		1.02194	0.0109981			1.2786	1.17001	1.38406	1.09097	1.12692	1.15594	1.13744	1.12295	1.08667	1.19345	1.16605	1.22616		1.17827	0.0244694		1.08698	1.00231	1.07013	0.988501	1.06393	1.02903	0.989906	1.16546	1.0488	1.0171	1.10386
6.20173	1.00956	1.01588	0.971653	1.03604	0.997734	0.974074	0.992678	0.99457	0.996609	1.06273	1.09318	0.97172	1.04962	1.04286	1.03735	1.1085		1.02217	0.0104555			1.2784	1.17102	1.37887	1.09133	1.13189	1.15584	1.13268	1.12549	1.08592	1.1952	1.16511	1.22856		1.17836	0.0241388		1.08614	1.00456	1.07456	0.988047	1.06632	1.02495	0.991528	1.16816	1.05146	1.01852	1.10582
6.20977	1.00544	1.01483	0.966836	1.03314	0.995325	0.971505	0.986306	0.996035	0.994034	1.0641	1.09558	0.967725	1.0498	1.04589	1.03124	1.1079		1.02036	0.0108745			1.27933	1.16816	1.38101	1.08944	1.12979	1.15182	1.1399	1.1251	1.08564	1.19298	1.1655	1.22721		1.17799	0.0243103		1.08743	1.00498	1.07216	0.986858	1.06692	1.02737	0.990061	1.16741	1.04985	1.01985	1.10323
6.2178	1.00692	1.01586	0.968057	1.03388	0.996664	0.972066	0.986687	0.995229	0.992662	1.06306	1.09432	0.973045	1.05262	1.04462	1.033	1.11244		1.02132	0.0108649			1.27817	1.17713	1.38017	1.08729	1.13245	1.16025	1.13385	1.12355	1.08892	1.19656	1.16311	1.22863		1.17917	0.0242284		1.08408	1.00646	1.07217	0.986344	1.06569	1.02753	0.99161	1.16571	1.05032	1.01831	1.10403
6.22583	1.0095	1.01644	0.970296	1.03741	0.995329	0.973551	0.988185	0.995737	0.999	1.06478	1.09322	0.968176	1.04569	1.0433	1.0336	1.11228		1.02166	0.0107273			1.27794	1.16961	1.38056	1.09062	1.12833	1.1594	1.13042	1.12594	1.0863	1.19892	1.16401	1.22522		1.17811	0.0242742		1.0855	1.00552	1.07531	0.989407	1.06804	1.02648	0.989383	1.16615	1.04992	1.0199	1.10374
6.23387	1.00865	1.01306	0.969294	1.03395	0.996529	0.976794	0.992414	0.998073	0.995113	1.06453	1.09438	0.970727	1.047	1.04503	1.03206	1.10699		1.02154	0.0104473			1.28124	1.17554	1.37704	1.08637	1.1255	1.15517	1.13942	1.11849	1.091	1.19798	1.16782	1.23295		1.17904	0.0243186		1.08267	1.00472	1.067	0.986217	1.06588	1.02911	0.990931	1.16885	1.05098	1.02114	1.10453
6.2419	1.00589	1.00796	0.967824	1.03148	0.999552	0.977575	0.991389	0.996009	0.999822	1.06504	1.09287	0.972349	1.05105	1.04685	1.02892	1.10522		1.02124	0.0103741			1.27507	1.16653	1.37972	1.0886	1.12525	1.15165	1.13362	1.12223	1.08866	1.19797	1.16623	1.22806		1.17697	0.0242782		1.08839	1.00669	1.07082	0.98627	1.06448	1.0246	0.991858	1.1689	1.04878	1.01917	1.10103
6.24993	1.00671	1.01371	0.967354	1.02982	0.994681	0.975986	0.988682	0.996467	0.994798	1.0636	1.09546	0.972226	1.04722	1.04442	1.02816	1.11232		1.02073	0.0107292			1.27571	1.16925	1.37917	1.0902	1.13	1.15206	1.13538	1.12326	1.08613	1.19579	1.16642	1.22793		1.17761	0.0241483		1.0823	1.00673	1.07166	0.988477	1.06544	1.02645	0.986982	1.16692	1.04979	1.02097	1.10221
6.25797	1.00655	1.01403	0.968958	1.03239	0.995025	0.972822	0.988148	0.996468	0.99268	1.06258	1.09027	0.968961	1.0506	1.04402	1.03173	1.11112		1.0204	0.010694			1.27921	1.16796	1.37462	1.09139	1.12266	1.14765	1.14077	1.12153	1.08696	1.19828	1.1681	1.23061		1.17748	0.0240934		1.08664	1.00519	1.07067	0.988725	1.06553	1.02567	0.99303	1.16756	1.049	1.02102	1.1037
6.266	1.00422	1.01209	0.967299	1.02987	0.995036	0.971743	0.992297	0.994879	0.996279	1.06345	1.09743	0.971055	1.05257	1.04615	1.03877	1.11261		1.02161	0.0109942			1.28002	1.16957	1.37939	1.08553	1.12784	1.14837	1.13427	1.12129	1.08879	1.19527	1.16532	1.22598		1.1768	0.0244349		1.08615	1.00485	1.06977	0.986005	1.06485	1.02515	0.98965	1.1655	1.04549	1.01286	1.10323
6.27403	1.00455	1.01429	0.966865	1.03174	0.99869	0.975979	0.988909	0.996443	0.997143	1.06494	1.09585	0.971849	1.04926	1.04434	1.03361	1.11016		1.02154	0.0107014			1.2766	1.16631	1.37699	1.0889	1.13209	1.1592	1.13474	1.12186	1.08558	1.19794	1.16593	1.22831		1.17787	0.0240728		1.08798	1.00735	1.07302	0.987162	1.0654	1.02617	0.990036	1.17223	1.05077	1.0176	1.10657
6.28207	1.00454	1.01382	0.969536	1.03313	0.995484	0.976233	0.989415	0.994258	0.997433	1.06378	1.09482	0.968519	1.05022	1.04832	1.03479	1.11438		1.02179	0.0109118			1.27879	1.17236	1.37849	1.08726	1.12738	1.15002	1.13105	1.1227	1.08958	1.19669	1.16457	1.22666		1.17713	0.0242979		1.08918	1.00361	1.07284	0.989323	1.06665	1.02728	0.990853	1.16788	1.04895	1.021	1.10286
6.2901	1.00462	1.01444	0.97028	1.03126	0.995291	0.972456	0.985732	0.994468	0.996137	1.06124	1.09712	0.969065	1.05167	1.04982	1.03197	1.11647		1.02138	0.0111219			1.27866	1.16839	1.37979	1.08697	1.12539	1.15557	1.13314	1.12654	1.08522	1.19233	1.16439	1.22802		1.17703	0.02441		1.08394	1.00367	1.07057	0.985944	1.06826	1.02597	0.988512	1.17363	1.04527	1.02204	1.10481
6.29813	1.0084	1.01963	0.973579	1.03461	0.996139	0.973454	0.992202	0.995538	0.994725	1.06298	1.09441	0.971669	1.04988	1.04811	1.03761	1.10746		1.02252	0.0105095			1.27894	1.17091	1.37383	1.08666	1.12523	1.15315	1.13578	1.12644	1.08584	1.19575	1.16556	1.22785		1.17716	0.0240284		1.09114	1.00642	1.07477	0.992082	1.06978	1.02678	0.988815	1.17107	1.04525	1.02234	1.1049
6.30617	1.00228	1.01438	0.970369	1.03052	0.993473	0.974647	0.988984	0.994311	0.996534	1.06517	1.09472	0.970426	1.05011	1.04922	1.03294	1.11984		1.02174	0.0111393			1.27876	1.16858	1.37905	1.08489	1.12634	1.15284	1.14046	1.12607	1.08367	1.19192	1.16506	1.22744		1.17709	0.0243762		1.09092	1.00693	1.07348	0.990399	1.06859	1.02695	0.990986	1.17511	1.04992	1.01898	1.10484
6.3142	1.00488	1.01508	0.967112	1.03372	0.996668	0.976959	0.987836	0.994213	0.994917	1.06438	1.09415	0.970882	1.05092	1.0475	1.03876	1.11786		1.02224	0.0110689			1.27998	1.17022	1.37675	1.08596	1.12649	1.1512	1.1368	1.12423	1.08829	1.19565	1.1661	1.22069		1.17686	0.0241055		1.08336	1.00628	1.07199	0.988422	1.06709	1.02745	0.989963	1.1743	1.0506	1.01876	1.10346
6.32223	1.00202	1.01643	0.969306	1.03315	0.998248	0.974189	0.99036	0.994943	0.994078	1.06199	1.0931	0.972614	1.05451	1.04942	1.03496	1.11377		1.02207	0.0108374			1.27547	1.1693	1.37617	1.0864	1.12942	1.15155	1.13675	1.12253	1.08623	1.19432	1.16509	1.22737		1.17672	0.0240501		1.08892	1.00754	1.077	0.990214	1.06828	1.02522	0.988177	1.17792	1.05299	1.0187	1.10623
6.33027	1.0059	1.0181	0.971516	1.03378	1.00196	0.975019	0.992466	0.996211	0.995402	1.06053	1.09569	0.970232	1.04922	1.04943	1.03428	1.11874		1.02303	0.0108774			1.27639	1.16956	1.37306	1.08443	1.13106	1.15461	1.13621	1.12322	1.08513	1.19379	1.16318	1.22484		1.17629	0.0238851		1.0898	1.00971	1.07521	0.9918	1.0698	1.02614	0.99057	1.17193	1.0485	1.01844	1.10295
6.3383	1.0027	1.01535	0.969739	1.03092	1.00094	0.977375	0.99273	0.99583	0.993768	1.06215	1.0938	0.969	1.04835	1.05018	1.03116	1.1101		1.02151	0.0105884			1.27887	1.16824	1.37413	1.08597	1.12601	1.15591	1.13397	1.12433	1.08761	1.19279	1.16505	1.22472		1.17647	0.0239834		1.08825	1.00681	1.07518	0.989122	1.06747	1.02948	0.992441	1.17261	1.04925	1.01864	1.10238
6.34633	1.00445	1.01677	0.970367	1.03277	1.00299	0.978684	0.993456	0.99457	0.995615	1.06187	1.08964	0.965487	1.04918	1.05189	1.02946	1.11566		1.02205	0.010692			1.27722	1.17497	1.37315	1.08694	1.12742	1.15202	1.1358	1.12282	1.08627	1.19617	1.16382	1.2215		1.17651	0.0238525		1.08715	1.00668	1.07163	0.987673	1.06771	1.02812	0.992246	1.17543	1.0488	1.01895	1.1039
6.35437	1.00664	1.01523	0.969711	1.03265	1.00384	0.978383	0.990714	0.999444	0.992766	1.06323	1.09352	0.963118	1.05077	1.04943	1.03687	1.12078		1.02294	0.0110927			1.27581	1.17176	1.37811	1.08569	1.12836	1.15348	1.13897	1.12513	1.08628	1.19565	1.16345	1.22622		1.17741	0.0241232		1.08646	1.00764	1.07213	0.986811	1.06291	1.02973	0.989811	1.16945	1.04945	1.01534	1.10316
6.3624	1.00488	1.015	0.966961	1.03117	0.999163	0.975559	0.989434	0.996913	0.995369	1.06181	1.08684	0.964374	1.05146	1.04715	1.03071	1.11237		1.02057	0.0106757			1.27511	1.17247	1.37766	1.08559	1.12617	1.15231	1.13955	1.12443	1.08433	1.19358	1.16058	1.22409		1.17632	0.0241481		1.08598	1.00282	1.07343	0.987967	1.06679	1.0309	0.989228	1.17249	1.05471	1.02093	1.10649
6.37043	1.00454	1.01334	0.970159	1.03251	1.00455	0.977064	0.993832	0.994813	0.993642	1.05801	1.08702	0.964885	1.04783	1.04757	1.03513	1.11901		1.02149	0.0107093			1.27447	1.16815	1.3741	1.08607	1.13019	1.15506	1.13867	1.12253	1.08394	1.19323	1.16283	1.22016		1.17578	0.0238007		1.08821	1.00421	1.07365	0.989946	1.069	1.02719	0.989855	1.1785	1.04848	1.01885	1.10419
6.37847	1.00565	1.01528	0.972365	1.03407	1.00147	0.974903	0.992242	0.996352	0.992708	1.06143	1.09084	0.965034	1.05087	1.04788	1.03806	1.11719		1.02227	0.0108632			1.27288	1.16745	1.37483	1.08281	1.12065	1.15469	1.13646	1.12241	1.08764	1.19448	1.16136	1.22605		1.17514	0.0240718		1.08556	1.00255	1.07455	0.986116	1.06305	1.02454	0.987239	1.18101	1.04726	1.02007	1.10483
6.3865	1.00255	1.01295	0.968232	1.03484	0.999667	0.977138	0.990547	0.996527	0.993372	1.06168	1.09763	0.967117	1.05225	1.05159	1.03592	1.11544		1.02234	0.0110878			1.28062	1.17243	1.37646	1.08672	1.12635	1.15248	1.13684	1.12734	1.08407	1.19175	1.15902	1.21568		1.17581	0.0240884		1.08719	1.00557	1.07271	0.988112	1.06671	1.02617	0.989066	1.17527	1.0497	1.01749	1.1043
6.39453	1.00432	1.01247	0.970404	1.03141	1.00279	0.979393	0.99475	0.997108	0.993068	1.06074	1.09083	0.965014	1.04926	1.05017	1.03726	1.1142		1.02207	0.0106642			1.27473	1.16784	1.37523	1.08414	1.12963	1.15251	1.13282	1.11601	1.08385	1.19511	1.16291	1.22636		1.1751	0.024256		1.08737	1.00517	1.07774	0.989776	1.0682	1.03008	0.991708	1.1803	1.0511	1.01805	1.10379
6.40257	1.00366	1.01408	0.972404	1.03241	1.00206	0.979064	0.994372	0.996266	0.992762	1.06219	1.09587	0.964216	1.04729	1.05157	1.03468	1.11008		1.02206	0.0106718			1.27799	1.16823	1.37408	1.08275	1.13152	1.15768	1.13955	1.11957	1.08768	1.19376	1.16333	1.22184		1.1765	0.0239311		1.08845	1.00495	1.07349	0.988695	1.0689	1.02873	0.991652	1.17582	1.04774	1.01747	1.10258
6.4106	1.00741	1.01917	0.976148	1.03401	1.00132	0.979335	0.990995	0.995433	0.993584	1.06387	1.09234	0.969026	1.05143	1.04984	1.03645	1.11545		1.02349	0.0106544			1.2779	1.16683	1.37424	1.08328	1.126	1.15077	1.13775	1.12273	1.08652	1.19436	1.16343	1.22315		1.17558	0.0240776		1.08466	1.00416	1.07305	0.986802	1.06612	1.02956	0.987529	1.17637	1.0467	1.01394	1.10163
6.41863	1.00378	1.01273	0.96815	1.03318	1.00246	0.979021	0.992856	0.996769	0.990278	1.06201	1.09132	0.967988	1.0484	1.05094	1.03578	1.11616		1.02199	0.0108164			1.27717	1.16809	1.37029	1.08114	1.12877	1.15437	1.13474	1.12413	1.08673	1.19125	1.16264	1.22299		1.17519	0.0237915		1.08855	1.00476	1.07771	0.991401	1.06669	1.02606	0.987093	1.18018	1.04916	1.01789	1.10688
6.42667	1.0041	1.01198	0.9731	1.0305	1.00076	0.976689	0.990711	0.992976	0.9921	1.06172	1.09284	0.969446	1.05112	1.0512	1.02949	1.11472		1.02147	0.0107645			1.2784	1.17052	1.37311	1.0825	1.12992	1.15856	1.13416	1.12366	1.08617	1.19208	1.16077	1.21918		1.17575	0.0239083		1.08784	1.00703	1.07647	0.988897	1.0674	1.02962	0.987202	1.17572	1.05069	1.01582	1.10406
6.4347	1.00651	1.0171	0.971766	1.03168	0.999905	0.980517	0.99116	0.995385	0.988607	1.06125	1.09677	0.967934	1.05017	1.05221	1.0377	1.11756		1.02289	0.0109907			1.27767	1.17346	1.3718	1.08504	1.12899	1.15283	1.1342	1.12525	1.08411	1.19223	1.16368	1.22181		1.17592	0.0238337		1.08968	1.00659	1.0751	0.992382	1.06876	1.02789	0.988128	1.17698	1.04632	1.01115	1.10409
6.44273	1.00754	1.01391	0.968219	1.03182	1.00579	0.979916	0.990712	0.997691	0.993301	1.06091	1.09314	0.970402	1.05245	1.05146	1.03282	1.11873		1.02305	0.0108359			1.27795	1.17697	1.3734	1.08777	1.12848	1.15543	1.14087	1.11822	1.08526	1.19388	1.16291	1.22318		1.17703	0.0238899		1.08638	1.00889	1.0747	0.988713	1.06552	1.02785	0.990668	1.18152	1.05336	1.01844	1.10848
6.45077	1.00686	1.01214	0.968555	1.03471	1.00316	0.982629	0.994264	0.99551	0.992792	1.06198	1.09273	0.970706	1.05052	1.05194	1.03281	1.11567		1.02294	0.0106835			1.273	1.17098	1.36957	1.08499	1.1303	1.15471	1.1339	1.12197	1.08608	1.19365	1.16519	1.22408		1.1757	0.0235563		1.0878	1.00612	1.07667	0.989706	1.06745	1.0267	0.987026	1.17492	1.04904	1.01348	1.10626
6.4588	1.00457	1.01303	0.969202	1.08349	1.00815	0.981507	0.997405	0.995517	0.992274	1.06476	1.09588	0.969075	1.05214	1.05103	1.03335	1.11098		1.0264	0.0112822			1.27489	1.17135	1.37233	1.08316	1.13057	1.15364	1.1362	1.12516	1.0824	1.19479	1.16367	1.21726		1.17545	0.0237831		1.08896	1.00599	1.07568	0.99133	1.06647	1.02463	0.988003	1.18079	1.04897	1.01627	1.10648
6.46683	1.00579	1.01539	0.9728	1.04344	1.00415	0.980937	0.995386	0.99628	0.992476	1.06377	1.09304	0.970135	1.05301	1.04972	1.0309	1.10786		1.02344	0.0104207			1.27266	1.16756	1.37368	1.08163	1.13121	1.15742	1.13699	1.12272	1.08333	1.19522	1.16333	1.22345		1.17577	0.0239122		1.09029	1.00769	1.07647	0.99296	1.07123	1.0255	0.990604	1.18258	1.04867	1.01639	1.10546
6.47487	1.00536	1.01692	0.969443	1.03496	1.0023	0.981175	0.996199	0.996597	0.990374	1.06211	1.09276	0.968936	1.05113	1.04959	1.03564	1.11344		1.02293	0.0106405			1.27449	1.17258	1.37019	1.08285	1.13062	1.15372	1.1338	1.12101	1.08453	1.19308	1.16388	1.21918		1.17499	0.0236964		1.09043	1.00655	1.07801	0.989777	1.06901	1.02998	0.984734	1.17367	1.04815	1.01701	1.10428
6.4829	1.00596	1.01766	0.970919	1.03987	1.00432	0.97964	0.997392	0.995018	0.990058	1.06119	1.09299	0.971624	1.05319	1.05285	1.03238	1.10738		1.02328	0.0104234			1.27811	1.17103	1.37461	1.08316	1.12681	1.15246	1.1379	1.12445	1.08856	1.19642	1.16542	1.22467		1.17697	0.0240152		1.08935	1.00549	1.08058	0.990116	1.06579	1.02456	0.985735	1.18172	1.04503	1.01987	1.10773
6.49093	1.00677	1.03323	0.970619	1.03602	1.00112	0.976192	0.992732	0.993476	0.993807	1.06427	1.08711	0.967494	1.05363	1.05285	1.03135	1.1106		1.0232	0.0106178			1.27767	1.16987	1.37262	1.08115	1.12888	1.15667	1.13916	1.12685	1.0855	1.19296	1.16279	1.22033		1.1762	0.0238392		1.08811	1.0045	1.07552	0.992172	1.06688	1.02701	0.985672	1.18139	1.05086	1.02033	1.10248
6.49897	1.00655	1.01574	0.968498	1.03448	1.0029	0.978704	0.996363	0.995058	0.991031	1.06069	1.09567	0.96665	1.05283	1.0516	1.02999	1.12001		1.02292	0.0110583			1.27762	1.17244	1.36872	1.08022	1.11582	1.1375	1.13003	1.12172	1.08412	1.19475	1.16328	1.22282		1.17242	0.0242791		1.08733	1.00715	1.07583	0.989762	1.06898	1.02714	0.98988	1.17928	1.04791	1.01667	1.10646
6.507	0.9973	0.998946	0.957175	1.01419	1.00318	0.977524	0.995529	0.99367	0.99576	1.06289	1.09352	0.96507	1.0531	1.05117	1.03136	1.11699		1.01921	0.0113215			1.27635	1.17485	1.36879	1.08351	1.12288	1.15208	1.13839	1.12253	1.0851	1.19416	1.16755	1.2252		1.17595	0.0237643		1.08905	1.0054	1.0757	0.991359	1.06739	1.02967	0.98574	1.18425	1.04809	1.01911	1.10583
6.51503	1.00077	0.999052	0.962582	1.01929	1.00216	0.97862	0.995367	0.995934	0.990505	1.06349	1.08824	0.964125	1.0491	1.05096	1.02873	1.11293		1.01887	0.0108703			1.27708	1.17527	1.36953	1.082	1.12753	1.15199	1.13805	1.12258	1.08608	1.19361	1.16423	1.21874		1.17556	0.023691		1.08984	1.00311	1.07326	0.989524	1.06962	1.02626	0.988203	1.18146	1.05146	1.01864	1.10391
6.52307	1.0019	1.00956	0.966685	1.02965	1.00132	0.972549	0.991163	0.993039	0.993384	1.06265	1.09531	0.970635	1.05258	1.05011	1.02869	1.11114		1.02065	0.0108991			1.27877	1.17395	1.36866	1.08293	1.124	1.15383	1.13955	1.12528	1.08305	1.19279	1.16544	1.22102		1.17577	0.0237572		1.08777	1.004	1.07241	0.989151	1.06831	1.02532	0.984519	1.18333	1.04915	1.01298	1.10569
6.5311	1.00377	1.00843	0.964522	1.0301	1.00438	0.980537	0.999535	0.996413	0.993018	1.06143	1.09244	0.968996	1.05442	1.05155	1.03248	1.11869		1.02255	0.0109198			1.27933	1.17606	1.36919	1.07959	1.12485	1.14967	1.13837	1.12179	1.08462	1.19166	1.1634	1.22124		1.17498	0.0239551		1.09066	1.00586	1.07656	0.991528	1.06889	1.02851	0.98851	1.18297	1.05046	1.01764	1.10704
6.53913	1.00187	1.00717	0.964888	1.02974	1.00135	0.978501	0.994004	0.996923	0.989217	1.06207	1.09375	0.969839	1.05278	1.05131	1.03261	1.10917		1.02095	0.0107486			1.27296	1.17163	1.36789	1.08265	1.1221	1.14817	1.13487	1.12732	1.08315	1.19306	1.16464	1.21931		1.17398	0.0236072		1.08792	1.00531	1.08	0.993925	1.06999	1.02696	0.988496	1.18834	1.04917	1.0172	1.10752
6.54717	1.00167	1.0073	0.963734	1.02646	0.999819	0.978296	0.991484	0.996674	0.992302	1.06032	1.08942	0.964268	1.05265	1.05169	1.02936	1.11528		1.02005	0.0109473			1.2761	1.16979	1.36704	1.08165	1.10852	1.13429	1.13526	1.11962	1.08199	1.19376	1.16308	1.22249		1.17113	0.0242755		1.09017	1.00713	1.07679	0.990091	1.07031	1.02795	0.986874	1.185	1.04804	1.01518	1.10354
6.5552	0.991939	0.992913	0.951643	1.00704	1.0137	0.981632	1.00448	1.00099	0.992811	1.06119	1.0945	0.967106	1.05401	1.05333	1.03216	1.11405		1.01959	0.0112764			1.27751	1.16781	1.36857	1.07899	1.12758	1.16019	1.13885	1.12266	1.08599	1.19495	1.16307	1.22227		1.1757	0.0237499		1.08918	1.00327	1.07439	0.991755	1.06513	1.02828	0.98717	1.18831	1.05016	1.01752	1.10877
6.56323	1.00759	1.0096	0.969635	1.0344	1.00933	0.981677	1.00226	0.996461	0.992795	1.061	1.09448	0.969017	1.05406	1.05349	1.03222	1.11114		1.0237	0.0105169			1.27809	1.17421	1.3674	1.08209	1.12405	1.15047	1.14034	1.12401	1.08322	1.1946	1.16226	1.21766		1.17487	0.0236881		1.09063	1.00652	1.08005	0.992336	1.06766	1.02966	0.989304	1.18308	1.0531	1.01673	1.10481
6.57127	1.00334	1.00971	0.96463	1.02971	1.00998	0.985209	1.00269	0.996372	0.991668	1.06154	1.09443	0.96588	1.05228	1.0541	1.03423	1.10981		1.02285	0.0106171			1.27632	1.17328	1.36665	1.08082	1.12696	1.15244	1.13998	1.12672	1.08292	1.1924	1.16132	1.21837		1.17485	0.0235314		1.08909	1.00728	1.07664	0.991187	1.06844	1.03176	0.989813	1.183	1.05015	1.0195	1.10588
6.5793	1.00524	1.00787	0.964303	1.03332	1.00367	0.982682	0.999255	0.99756	0.992343	1.06104	1.09455	0.965654	1.05418	1.05581	1.03799	1.11226		1.02298	0.0108671			1.27354	1.16869	1.36982	1.08308	1.12619	1.15676	1.13852	1.12631	1.08309	1.195	1.16227	1.21926		1.17521	0.0236029		1.09264	1.00941	1.08238	0.993396	1.07209	1.02997	0.98928	1.18446	1.05134	1.01814	1.10609
6.58733	1.00676	1.0067	0.967657	1.02778	1.00098	0.979977	0.998761	0.996673	0.993738	1.0623	1.09653	0.965074	1.05408	1.04999	1.03387	1.10881		1.02186	0.0107142			1.27634	1.16629	1.36577	1.08064	1.12882	1.15209	1.1368	1.12411	1.08435	1.19281	1.15997	1.21894		1.17391	0.023521		1.09286	1.00706	1.08015	0.991053	1.06798	1.02914	0.988239	1.18759	1.05133	1.01224	1.10834
6.59537	1.00628	1.00638	0.967813	1.03103	1.00175	0.983462	0.997909	0.995186	0.992273	1.06027	1.09025	0.966857	1.05465	1.05387	1.03317	1.11562		1.0223	0.0107473			1.27323	1.17769	1.36726	1.08103	1.12245	1.14743	1.13714	1.12338	1.08276	1.19275	1.16321	1.21943		1.17398	0.0236762		1.09108	1.00394	1.07816	0.994544	1.06773	1.02758	0.987071	1.18959	1.05076	1.01331	1.10819
6.6034	1.00583	1.00928	0.964634	1.02723	1.0037	0.984809	1.00186	0.997197	0.990482	1.06363	1.09642	0.969596	1.05589	1.05154	1.03385	1.12032		1.02352	0.0110456			1.27852	1.17466	1.3675	1.08069	1.12433	1.15103	1.13528	1.12851	1.08483	1.19361	1.16024	1.21871		1.17483	0.0237017		1.0908	1.00876	1.07891	0.990266	1.07016	1.02828	0.988347	1.18777	1.05136	1.01488	1.10616
6.61143	1.0057	1.00591	0.96873	1.0304	1.00449	0.98147	0.995336	0.996198	0.991285	1.06192	1.09383	0.968368	1.0583	1.05068	1.03221	1.12113		1.02287	0.0110664			1.27924	1.17284	1.36598	1.07772	1.12556	1.15146	1.13697	1.12085	1.08428	1.19241	1.16127	1.21944		1.174	0.0238158		1.09505	1.00655	1.08011	0.992173	1.07088	1.0285	0.985432	1.18554	1.04974	1.01721	1.10951
6.61947	1.00461	1.00638	0.966987	1.03119	1.0043	0.982669	1.00056	0.994631	0.992622	1.06211	1.09129	0.965045	1.05509	1.05107	1.03411	1.11433		1.02231	0.0107731			1.27389	1.17117	1.36487	1.08137	1.12566	1.1476	1.1378	1.13168	1.0856	1.19024	1.16005	1.21713		1.17392	0.0232355		1.09523	1.0063	1.07974	0.991628	1.06987	1.02811	0.988337	1.19163	1.04839	1.01573	1.1117
6.6275	1.00465	1.00807	0.967679	1.02811	1.00843	0.986485	1.00603	0.998823	0.991738	1.06027	1.08977	0.966373	1.0513	1.05655	1.03409	1.11767		1.0235	0.0106271			1.27642	1.17303	1.36342	1.08004	1.12366	1.15252	1.13365	1.12499	1.08294	1.19154	1.15852	1.222		1.17356	0.0235753		1.09081	1.00412	1.07912	0.99275	1.06759	1.02593	0.986197	1.18636	1.05214	1.01292	1.10878
6.63553	1.00404	1.00732	0.967615	1.02767	1.0048	0.988081	0.999645	0.997353	0.992218	1.06043	1.09206	0.969805	1.05765	1.05126	1.02902	1.11462		1.02273	0.0105722			1.27985	1.17201	1.36415	1.07939	1.12681	1.15443	1.13425	1.12565	1.08128	1.19426	1.15859	1.21747		1.17401	0.0236735		1.09414	1.00529	1.07631	0.99141	1.07012	1.02957	0.98921	1.1884	1.04928	1.01445	1.10651
6.64357	1.00457	1.00978	0.969962	1.02889	1.00272	0.984445	0.998719	0.995869	0.990589	1.05895	1.09208	0.965273	1.05252	1.05358	1.03315	1.11695		1.02238	0.0107556			1.27482	1.1682	1.36316	1.07757	1.13144	1.15671	1.1369	1.12097	1.08118	1.19267	1.16207	1.21913		1.17373	0.0234717		1.09466	1.00731	1.07923	0.990898	1.06811	1.02706	0.989052	1.19022	1.05181	1.0113	1.1076
6.6516	1.01	1.00969	0.970117	1.03354	0.999303	0.985013	0.995309	0.993922	0.991495	1.06324	1.09279	0.967943	1.05476	1.05104	1.03272	1.11766		1.02303	0.0108465			1.27852	1.16672	1.35928	1.08112	1.12621	1.15387	1.13654	1.12335	1.08498	1.19451	1.16339	1.22084		1.17411	0.0232321		1.09214	1.00645	1.07802	0.993236	1.07022	1.02956	0.988391	1.18764	1.04651	1.01345	1.10981
6.65963	1.00744	1.00746	0.965594	1.02823	1.00551	0.986824	1.00596	0.99669	0.995083	1.06249	1.08764	0.965436	1.04905	1.05266	1.03326	1.11708		1.0229	0.0105573			1.27772	1.17544	1.36609	1.0777	1.12882	1.1508	1.13028	1.12568	1.08091	1.19049	1.15868	1.21573		1.1732	0.0237829		1.09268	1.00743	1.07733	0.99449	1.06957	1.02737	0.986449	1.18881	1.04806	1.01178	1.10939
6.66767	1.00435	1.00524	0.965901	1.02747	1.00047	0.982425	1.00011	0.994117	0.99356	1.06136	1.0918	0.969995	1.05391	1.04846	1.03618	1.117		1.02202	0.0107887			1.27773	1.1727	1.36163	1.08191	1.132	1.15192	1.13868	1.12371	1.08384	1.19154	1.1628	1.21578		1.17452	0.023156		1.09489	1.00766	1.07843	0.98929	1.06831	1.02404	0.984643	1.19089	1.05018	1.00943	1.10797
6.6757	1.0078	1.00909	0.967597	1.02848	1.00341	0.989714	1.00387	0.995922	0.993217	1.06034	1.0944	0.967198	1.05641	1.05219	1.03172	1.1189		1.02377	0.0107701			1.27685	1.16763	1.35993	1.07859	1.12533	1.15418	1.13413	1.12479	1.08332	1.18983	1.1609	1.21393		1.17245	0.0232376		1.09664	1.00627	1.08181	0.9933	1.0683	1.02306	0.982389	1.19208	1.05238	1.01228	1.10576
6.68373	1.00648	1.01106	0.96865	1.03252	1.00196	0.987815	1.00032	0.994155	0.991297	1.05915	1.09147	0.966262	1.05435	1.05259	1.03311	1.12577		1.02356	0.0110347			1.27446	1.17495	1.36316	1.07842	1.12594	1.14457	1.13707	1.12661	1.08173	1.19576	1.16166	1.22022		1.17371	0.0235283		1.09928	1.01066	1.08152	0.991776	1.07397	1.02496	0.986409	1.18996	1.04967	1.01079	1.10665
6.69177	1.00637	1.00971	0.967643	1.03277	1.0057	0.98799	1.00704	0.997947	0.997254	1.06514	1.096	0.964997	1.05678	1.05567	1.03533	1.11729		1.02523	0.0108637			1.2727	1.17025	1.36073	1.0791	1.13155	1.15674	1.13454	1.12533	1.08421	1.19324	1.1589	1.21985		1.17393	0.0230972		1.09327	1.00574	1.07588	0.990526	1.06797	1.0253	0.985226	1.19736	1.05034	1.00927	1.10856
6.6998	1.01108	1.0124	0.969801	1.02993	1.00541	0.992565	1.00839	0.998518	0.990926	1.06106	1.09355	0.965766	1.05524	1.05258	1.03798	1.12412		1.02558	0.0108335			1.27351	1.17215	1.35854	1.08083	1.12295	1.15464	1.13285	1.11957	1.08579	1.19409	1.16433	1.21995		1.17327	0.0231369		1.09733	1.00547	1.08009	0.992806	1.06937	1.03106	0.987763	1.19644	1.05003	1.00846	1.10576
6.70783	1.00353	1.00682	0.963509	1.0325	1.00354	0.989555	1.0024	0.995984	0.994614	1.05945	1.09131	0.965865	1.05602	1.05478	1.02905	1.11565		1.02279	0.0107446			1.27298	1.16695	1.35764	1.0768	1.12876	1.15693	1.13224	1.12626	1.0837	1.19083	1.15825	1.2163		1.1723	0.0229988		1.09633	1.00839	1.08068	0.995968	1.07031	1.02848	0.985845	1.19916	1.05073	1.01188	1.10981
6.71587	1.00958	1.01024	0.969163	1.03555	1.00312	0.985526	1.0045	0.994487	0.993538	1.06094	1.0942	0.965592	1.05539	1.05195	1.03186	1.11737		1.02394	0.0107786			1.27448	1.17033	1.35938	1.07797	1.12566	1.15238	1.13451	1.12459	1.0853	1.19471	1.16402	1.21928		1.17355	0.0231837		1.09573	1.0054	1.07963	0.992857	1.06949	1.02564	0.986543	1.19026	1.04913	1.00857	1.10568
6.7239	1.00873	1.01066	0.966811	1.02986	1.00509	0.988261	1.00898	0.996934	0.995026	1.06467	1.09049	0.966715	1.05514	1.05053	1.03046	1.11602		1.02402	0.0105453			1.2746	1.1682	1.35862	1.08043	1.13292	1.1599	1.14321	1.12053	1.08525	1.19486	1.16619	1.21649		1.1751	0.0228389		1.09946	1.0104	1.08184	0.995566	1.07105	1.02433	0.987086	1.1939	1.04948	1.00843	1.10614
6.73193	1.00839	1.01373	0.967313	1.02859	1.00364	0.988078	1.00665	0.995923	0.994313	1.06214	1.08915	0.96765	1.05583	1.05259	1.03514	1.12052		1.02435	0.0106852			1.27437	1.17284	1.36055	1.07789	1.12605	1.15194	1.13361	1.12409	1.08041	1.18994	1.15703	1.21933		1.17234	0.0234111		1.09696	1.00675	1.08167	0.993014	1.07212	1.02524	0.985115	1.19648	1.05273	1.01117	1.1077
6.73997	1.00811	1.01116	0.969429	1.02905	1.00097	0.990475	1.00423	0.995303	0.99513	1.0591	1.0914	0.965843	1.05446	1.0527	1.03397	1.12026		1.02385	0.010684			1.2743	1.1694	1.36082	1.07796	1.13007	1.15435	1.13392	1.12473	1.08191	1.19208	1.1575	1.21459		1.17264	0.0232345		1.09766	1.01019	1.08434	0.993493	1.07082	1.02564	0.984721	1.19945	1.04888	1.00984	1.10579
6.748	1.00922	1.01252	0.965256	1.02748	1.0059	0.988962	1.01036	0.997674	0.991232	1.06107	1.0958	0.966672	1.05449	1.04918	1.03294	1.12019		1.02431	0.0108074			1.27024	1.16638	1.3608	1.07847	1.12662	1.15462	1.13809	1.12488	1.07948	1.1937	1.1654	1.21709		1.17298	0.0231765		1.09811	1.01006	1.08106	0.993657	1.07313	1.02803	0.984573	1.19564	1.05353	1.01113	1.11022
6.75603	1.00786	1.01031	0.965685	1.03235	1.00241	0.986146	1.00528	0.994612	0.995247	1.06197	1.09278	0.964418	1.05519	1.031	1.03194	1.12126		1.0224	0.0108174			1.27747	1.17359	1.35844	1.08121	1.12581	1.15745	1.13986	1.12415	1.0826	1.19347	1.15858	1.21688		1.17413	0.0230929		1.09814	1.00909	1.08676	0.993653	1.07485	1.0257	0.983947	1.19583	1.04778	1.00841	1.10851
6.76407	1.00934	1.0092	0.967608	1.0292	1.00085	0.98907	1.00541	0.995672	0.992182	1.05907	1.09609	0.962951	1.05616	1.03387	1.02909	1.11848		1.02214	0.0107512			1.27359	1.17228	1.35795	1.07631	1.1269	1.15835	1.13687	1.12313	1.08167	1.18893	1.15645	1.21599		1.17237	0.023113		1.0933	1.0044	1.07962	0.990348	1.0712	1.01194	0.966952	1.19474	1.05069	1.01063	1.10717
6.7721	1.00795	1.01021	0.96811	1.02981	1.00367	0.990691	1.00347	0.996517	0.991666	1.05935	1.09366	0.966993	1.05627	1.03632	1.03373	1.12117		1.0231	0.0106886			1.27561	1.17048	1.36046	1.08045	1.12867	1.1552	1.13468	1.12308	1.0784	1.18919	1.15795	1.21294		1.17226	0.0232754		1.09754	1.00915	1.08167	0.993464	1.07245	1.01202	0.971848	1.192	1.05045	1.00985	1.1108
6.78013	1.00859	1.0112	0.970045	1.03129	1.00435	0.989848	1.00802	0.998003	0.990537	1.05943	1.09443	0.967249	1.05433	1.05258	1.03468	1.1192		1.02461	0.0106679			1.27086	1.17227	1.35885	1.08041	1.12833	1.15328	1.13415	1.12334	1.08491	1.19331	1.15912	1.2146		1.17278	0.0228872		1.0978	1.005	1.08164	0.989707	1.07072	1.01363	0.968788	1.19786	1.05509	1.0102	1.1101
6.78817	1.00938	1.01029	0.968719	1.03236	1.00108	0.983657	0.998723	0.992448	0.996771	1.06177	1.09311	0.966885	1.05674	1.05577	1.03538	1.11751		1.02379	0.0108926			1.27161	1.17206	1.35973	1.07831	1.12847	1.15895	1.1395	1.12423	1.08174	1.19348	1.1627	1.21882		1.17413	0.0230575		1.09903	1.00384	1.08318	0.994956	1.07122	1.02679	0.984289	1.19858	1.04985	1.01026	1.10728
6.7962	1.00874	1.00973	0.968224	1.03292	1.007	0.992988	1.01144	0.997376	0.995037	1.06141	1.09584	0.968507	1.05617	1.05434	1.0384	1.12574		1.02649	0.0109237			1.27126	1.17231	1.35831	1.07944	1.12871	1.15361	1.13592	1.12522	1.0817	1.19388	1.16143	1.21861		1.17337	0.0229832		1.09528	1.00458	1.08221	0.992714	1.07049	1.03177	0.984216	1.19603	1.04916	1.00932	1.10591
6.80423	1.0085	1.00846	0.970971	1.03153	1.00408	0.987492	1.00532	0.995495	0.995408	1.05967	1.09444	0.96895	1.05439	1.05212	1.03644	1.12531		1.02491	0.0108862			1.27319	1.17218	1.3547	1.07634	1.13079	1.163	1.13898	1.12615	1.08454	1.19222	1.16316	1.21945		1.17456	0.0227049		1.10029	1.0089	1.08057	0.992615	1.07332	1.02722	0.98429	1.19744	1.05313	1.01079	1.11142
6.81227	1.00995	1.01305	0.971612	1.03498	1.00156	0.989239	1.00396	0.994568	0.99613	1.06238	1.09711	0.971833	1.05792	1.0537	1.03598	1.132		1.02662	0.011219			1.27119	1.17672	1.35483	1.07747	1.12963	1.15607	1.13401	1.12712	1.08269	1.19346	1.16105	1.21835		1.17355	0.0227645		1.1003	1.00439	1.08415	0.992126	1.07316	1.0269	0.98436	1.20356	1.05252	1.01088	1.11244
6.8203	1.01032	1.01088	0.971148	1.03403	1.00059	0.991016	1.00795	0.996313	0.996982	1.05942	1.09251	0.967241	1.05572	1.05309	1.03344	1.12171		1.02515	0.0106616			1.27503	1.16873	1.35526	1.07929	1.12807	1.15218	1.13677	1.12284	1.08442	1.19109	1.15948	1.21398		1.17226	0.0228195		1.0979	1.00736	1.08423	0.990987	1.07323	1.02956	0.984405	1.20109	1.05487	1.00965	1.11148
6.82833	1.00943	1.00967	0.970167	1.03016	1.00009	0.986183	1.00953	0.996029	0.992053	1.06123	1.09338	0.96547	1.05538	1.05323	1.03297	1.12304		1.02425	0.0109393			1.27065	1.17272	1.354	1.07841	1.12397	1.15008	1.13423	1.125	1.08216	1.19166	1.15984	1.21784		1.17171	0.0228212		1.0968	1.00885	1.08466	0.989775	1.07131	1.02747	0.986811	1.20071	1.0523	1.01169	1.10852
6.83637	1.00656	1.00852	0.970137	1.02918	1.0022	0.990021	1.01076	0.996576	0.99443	1.0598	1.09555	0.965733	1.05419	1.05604	1.03293	1.11925		1.02449	0.0107599			1.27417	1.1733	1.35674	1.08053	1.12608	1.15315	1.13876	1.12239	1.08197	1.19407	1.1594	1.21989		1.17337	0.0230264		1.09924	1.00479	1.08348	0.990323	1.07264	1.02693	0.984702	1.19841	1.05184	1.01074	1.10863
6.8444	1.00719	1.00993	0.970308	1.03108	1.0062	0.997266	1.01492	0.998582	0.994731	1.06019	1.1003	0.968179	1.05887	1.05593	1.03525	1.12547		1.02715	0.0109501			1.27312	1.17235	1.35398	1.07486	1.1304	1.15779	1.13661	1.12672	1.0802	1.1939	1.16266	1.21866		1.17344	0.0228901		1.09886	1.005	1.08254	0.990703	1.07238	1.02761	0.984522	1.19682	1.05341	1.00777	1.10824
6.85243	1.01128	1.01097	0.972795	1.03151	1.00693	0.999119	1.01251	0.997506	0.995714	1.06214	1.09781	0.969481	1.05753	1.05982	1.02998	1.11814		1.02708	0.0105244			1.27134	1.17164	1.35597	1.07638	1.13325	1.15304	1.13851	1.12651	1.08202	1.19514	1.15917	1.21958		1.17355	0.0228532		1.09965	1.00617	1.08725	0.991769	1.07284	1.02851	0.985819	1.20279	1.05227	1.01114	1.11084
6.86047	1.00914	1.0122	0.971346	1.0331	1.00076	0.993294	1.00846	0.995737	0.995122	1.06119	1.09383	0.966994	1.05874	1.06084	1.03684	1.12699		1.02654	0.0110518			1.27383	1.17188	1.35465	1.07772	1.12859	1.15565	1.13678	1.12638	1.08203	1.19057	1.15826	1.21944		1.17298	0.0228563		1.10313	1.00719	1.08973	0.992649	1.07746	1.02709	0.985984	1.20296	1.05316	1.00285	1.10612
6.8685	1.00719	1.01239	0.969918	1.03106	0.998932	0.995317	1.00898	0.997158	0.995127	1.06132	1.0964	0.962653	1.05354	1.05774	1.03789	1.12725		1.0258	0.0111493			1.2783	1.17653	1.35561	1.07752	1.12701	1.14844	1.14549	1.12579	1.0786	1.19012	1.1585	1.22082		1.17356	0.0231864		1.10133	1.00825	1.08836	0.992373	1.07407	1.03046	0.986753	1.20182	1.05354	1.01119	1.11003
6.87653	1.00934	1.00799	0.970083	1.03112	1.00169	0.993251	1.00744	0.992735	0.990818	1.0548	1.10052	0.966427	1.05813	1.05649	1.03311	1.1189		1.02455	0.0109257			1.27235	1.16779	1.35353	1.07816	1.12718	1.1554	1.13583	1.12957	1.08335	1.19423	1.16056	1.21976		1.17314	0.0226945		1.09782	1.00432	1.08377	0.989943	1.07034	1.03061	0.989236	1.1997	1.05345	1.00883	1.11055
6.88457	1.0115	1.01023	0.971036	1.03524	0.999534	0.993589	1.00631	0.994457	0.994761	1.0583	1.09795	0.968034	1.05765	1.05653	1.0304	1.11698		1.02516	0.0106992			1.27393	1.17587	1.35419	1.07651	1.12487	1.15542	1.13593	1.12588	1.07943	1.19167	1.15582	1.21678		1.17219	0.023006		1.10181	1.00491	1.08664	0.992232	1.07452	1.02694	0.986512	1.20295	1.04938	1.01043	1.10722
6.8926	1.00879	1.00808	0.973046	1.03294	1.00187	0.990271	1.00753	0.99448	0.990576	1.05512	1.09585	0.964882	1.05543	1.05626	1.03715	1.12615		1.0249	0.0110487			1.27444	1.17595	1.35243	1.07872	1.13007	1.15247	1.1365	1.13087	1.08215	1.19254	1.15731	1.21761		1.17342	0.0226342		1.09955	1.00562	1.085	0.990535	1.07297	1.03262	0.984714	1.2048	1.05013	1.00594	1.10966
6.90063	1.00585	1.00657	0.970881	1.03179	1.0018	0.991712	1.00755	0.995826	0.994723	1.05843	1.09798	0.965597	1.05763	1.05587	1.03353	1.12608		1.02511	0.0111205			1.27418	1.1737	1.3547	1.07987	1.13266	1.14831	1.1374	1.13352	1.08291	1.1913	1.15616	1.21581		1.17338	0.0226225		1.10024	1.00771	1.08217	0.986331	1.07781	1.02525	0.986016	1.20428	1.04967	1.00732	1.10971
6.90867	1.00655	1.00956	0.969391	1.03669	1.00035	0.989132	1.00722	0.991795	0.995494	1.05716	1.09642	0.963546	1.05714	1.05797	1.0401	1.12221		1.02504	0.0111242			1.27441	1.17319	1.35197	1.07633	1.13476	1.1471	1.13465	1.13262	1.07854	1.18812	1.15563	1.21583		1.17193	0.0227246		1.10379	1.00622	1.0875	0.991172	1.07657	1.02825	0.984281	1.20237	1.05183	1.00886	1.11028
6.9167	1.00485	1.00999	0.967406	1.03022	1.00248	0.997662	1.00936	0.993137	0.98903	1.05313	1.09548	0.966858	1.05651	1.05852	1.03319	1.12045		1.02426	0.0108411			1.27266	1.17237	1.35271	1.07821	1.13141	1.15155	1.1378	1.12507	1.08098	1.18791	1.15693	1.21334		1.17175	0.0226127		1.10208	1.00558	1.08859	0.991638	1.07363	1.02722	0.983934	1.20318	1.0523	1.00512	1.11021
6.92473	1.00608	1.01098	0.969924	1.0328	1.00586	0.993567	1.01237	0.996202	0.990499	1.05586	1.09881	0.966465	1.06084	1.06187	1.03482	1.12614		1.02644	0.0111702			1.27302	1.17595	1.35031	1.07799	1.13295	1.15109	1.13995	1.12871	1.08031	1.18894	1.15813	1.21619		1.1728	0.0224535		1.10251	1.0076	1.08353	0.993341	1.07583	1.02496	0.982194	1.20246	1.0523	1.00534	1.1063
6.93277	1.00858	1.00899	0.972951	1.03059	0.997709	0.992237	1.0072	0.994266	0.992862	1.05594	1.09507	0.967502	1.06025	1.06266	1.03716	1.11974		1.02523	0.0108658			1.27263	1.17223	1.34958	1.07737	1.12545	1.15368	1.14097	1.12609	1.08055	1.19056	1.15543	1.21848		1.17192	0.0225851		1.10265	1.00737	1.08805	0.992623	1.07504	1.0303	0.984937	1.20286	1.05248	1.00312	1.10807
6.9408	1.00871	1.00988	0.978061	1.03357	1.00687	0.994356	1.01149	0.996358	0.99446	1.05703	1.0973	0.962524	1.05652	1.05888	1.03616	1.12268		1.02655	0.0107818			1.27641	1.17008	1.35211	1.07574	1.12949	1.15404	1.13756	1.13153	1.08281	1.19168	1.15589	1.21868		1.173	0.0227523		1.10307	1.00891	1.08619	0.992612	1.07736	1.02868	0.987661	1.20492	1.05484	1.00457	1.10701
6.94883	1.01116	1.01117	0.970553	1.03364	1.00294	0.99523	1.01138	0.996705	0.993826	1.05666	1.09669	0.963751	1.05737	1.06058	1.03714	1.12509		1.02649	0.0110093			1.2715	1.17113	1.34952	1.07667	1.12839	1.15331	1.1387	1.12979	1.0811	1.19191	1.1534	1.21817		1.17197	0.0224924		1.10076	1.00758	1.08635	0.989819	1.07299	1.02693	0.985321	1.20376	1.05393	1.00536	1.10608
6.95687	1.00601	1.01148	0.97006	1.02949	1.00109	0.995618	1.01	0.995176	0.993415	1.05758	1.10067	0.967199	1.06122	1.06139	1.0298	1.11475		1.02531	0.0107954			1.27528	1.17576	1.34696	1.07728	1.13254	1.15291	1.13799	1.12812	1.08198	1.19318	1.15998	1.2187		1.17339	0.0223816		1.09774	1.00063	1.0843	0.989855	1.0719	1.02591	0.986237	1.20647	1.05391	1.00438	1.10818
6.9649	1.00801	1.01144	0.973551	1.03049	1.00414	0.994185	1.00719	0.995276	0.993134	1.05821	1.0984	0.965879	1.06078	1.05909	1.0335	1.12074		1.02588	0.0108789			1.27485	1.16844	1.3485	1.07526	1.1259	1.15304	1.13157	1.12653	1.08028	1.19134	1.15658	1.21748		1.17081	0.0227577		1.10179	1.00871	1.08543	0.991317	1.07543	1.0322	0.983646	1.20308	1.05119	1.00373	1.10513
6.97293	1.00553	1.00581	0.968448	1.03049	0.997488	0.992673	1.00581	0.994476	0.989832	1.05479	1.09751	0.966683	1.06225	1.06153	1.03507	1.11764		1.02413	0.0110404			1.27132	1.17149	1.34669	1.07874	1.12885	1.15323	1.13979	1.12837	1.08281	1.19272	1.15836	1.21994		1.17269	0.0222068		1.10523	1.01052	1.08936	0.990247	1.07554	1.02713	0.981098	1.2012	1.05066	1.00885	1.10994
6.98097	1.00629	1.00936	0.971445	1.02836	1.00245	0.998829	1.00948	0.9947	0.99361	1.0586	1.10036	0.965768	1.05904	1.06184	1.0371	1.12223		1.02622	0.011034			1.27459	1.17577	1.34807	1.07633	1.13126	1.15294	1.13191	1.12981	1.08255	1.19085	1.15699	1.216		1.17226	0.022465		1.1044	1.0068	1.08869	0.992081	1.07674	1.02365	0.985423	1.20262	1.0557	1.00535	1.10799
6.989	1.00782	1.0126	0.968266	1.0296	1.00545	0.996922	1.00865	0.994172	0.992376	1.05653	1.1015	0.964216	1.06027	1.06326	1.0338	1.12613		1.02635	0.0113035																			1.10207	1.008	1.08571	0.986039	1.07223	1.02666	0.986801	1.21171	1.05416	1.01167	1.11176
6.99703	1.00791	1.01	0.968418	1.03264	0.998035	0.989676	1.00432	0.994216	0.990502	1.05616	1.10175	0.963395	1.0599	1.06327	1.0374	1.12318		1.02505	0.0114472																			1.1008	1.00663	1.08476	0.985774	1.07704	1.02989	0.986837	1.20504	1.05046	1.00758	1.10896
[truncated: 2 more columns]

## Sheet: Fig 4 F-H
	Fig. 4F pH-Lemon-GPI expressed in control HeLa cells																			Fig. 4G HeLa cells co-expressing wild-type TPC2-mCherry																Fig. 4H HeLa cells co-expressing TPC2L 265P -mCherry
	Control + TPC1-A1-P																			TPC2wt + TPC2-A1-P																TPC2L265P + TPC2-A1-P
Time (min)	cell 01	cell 02	cell 03	cell 04	cell 05	cell 06	cell 07	cell 08	cell 09	cell 10	cell 11	cell 12	cell 13	cell 14	cell 15		Average	SEM		cell 01	cell 02	cell 03	cell 04	cell 05	cell 06	cell 07	cell 08	cell 09	cell 10	cell 11	cell 12		Average	SEM		cell 01	cell 02	cell 03	cell 04	cell 05	cell 06		Average	SEM
0	1.00231	0.997744	1.00449	1.00699	0.992373	0.995628	1.00282	1.00538	0.999015	0.997966	1.00029	1.00645	0.999868	0.999263	1.01113		1.00145	0.00126004		1.00276	0.995803	1.00595	1.00193	0.991559	1.0034	0.990763	0.9915	1.01001	1.00287	1.00256	1.00091		1	0.0017846		1.0001	1.00141	0.999939	0.999201	1.00365	0.999523		1.00064	0.000677545
0.00803333	1.00091	0.997555	1.00476	1.0022	0.997885	1.00087	1.01165	1.00278	0.999103	1.00131	0.999402	0.999416	1.00297	0.99856	1.00931		1.00169	0.00107655		1.00199	0.99401	1.00505	0.999216	0.993896	0.999113	0.991654	0.998746	1.01671	1.00432	1.00219	1.00138		1.00069	0.00189508		1.0038	1.0029	1.00474	1.00701	1.00616	0.997583		1.0037	0.00136774
0.0160667	1.00183	1.00223	1.00335	1.00621	0.992842	1.00195	1.00653	1.00907	1.00096	1.00061	1.00209	0.992989	0.999663	0.998231	1.01163		1.00184	0.00135315		1.0072	0.994403	1.00595	1.00229	0.999813	1.0032	0.995899	0.992348	1.00969	1.00839	1.00492	1.00404		1.00235	0.00162454		1.00393	1.00246	1.00167	1.00397	1.00287	0.993745		1.00144	0.00158043
0.0241	1.00085	0.997339	1.0036	1.00238	0.996434	1.00104	1.00535	1.00223	0.997954	0.997766	0.998352	1.00493	1.00369	1.00172	1.00974		1.00157	0.000934976		1.00516	0.997665	1.00863	1.00205	0.996583	1.00133	0.999293	0.994779	1.01084	1.00032	1.00084	1.00126		1.00156	0.00135574		1.00356	1.00232	1.00057	1.00381	1.0066	0.996719		1.00226	0.00137222
0.0321333	1.00182	0.994064	1.00831	1.00414	0.993436	0.994446	1.00234	1.00384	0.999124	0.998635	1.00045	1.00019	1.00425	0.999058	1.01126		1.00098	0.00130069		1.00127	0.996417	1.00581	1.00351	0.991843	0.99692	0.996168	0.994302	1.02755	0.994128	1.00079	1.00268		1.00095	0.00271686		1.00254	0.998306	0.999814	0.998169	1.00535	0.996872		1.00018	0.00130356
0.0401667	0.996699	0.999469	1.00451	1.00212	0.998994	1.00119	1.00326	1.00702	0.998499	1.00134	0.999302	1.00076	1.0013	0.996842	1.00154		1.00063	0.00073633		1.00825	0.99669	1.00854	1.00357	0.999374	1.00302	0.999897	0.987066	1.00481	1.00127	1.00105	1.00219		1.00131	0.00163189		1.00234	1.00274	0.999761	1.00346	1.00508	0.998686		1.00201	0.000970947
0.0482	0.999858	1.01146	1.00577	1.0009	0.994196	0.997648	1.00387	1.00528	0.996164	0.997225	1.00259	1.0067	1.003	1.00075	1.01844		1.00297	0.00159621		1.00046	0.994942	1.00564	1.00158	0.996444	0.999877	0.994695	0.995475	1.01385	1.00059	1.00368	1.00146		1.00073	0.00156415		1.00236	0.998683	0.999481	1.00303	1.00598	1.00151		1.00184	0.00107171
0.0562333	1.0027	1.0019	1.00751	1.00015	0.989605	0.99295	1.00137	1.0016	0.996571	0.998115	0.998833	1.0052	1.00195	1.00392	1.00516		1.00049	0.00122649		1.00414	0.995462	1.0094	0.998432	0.992106	0.998325	0.992649	0.991435	1.00745	0.995963	1.00093	1.00149		0.998982	0.0017046		0.998857	1.00091	0.997499	1.00002	1.00451	0.997129		0.999821	0.0011071
0.0642667	1.00439	1.00027	1.00575	1.00039	1.00051	0.999489	1.00617	1.00409	0.996993	0.996586	0.999919	1.00267	1.00339	0.999994	1.00691		1.00193	0.000791862		1.00301	0.995877	1.00824	0.99603	0.986257	0.998064	0.995623	0.992391	1.01092	1.003	1.00183	1.00184		0.999423	0.00196632		1.00156	1.00273	0.999975	1.00256	1.00378	0.996304		1.00115	0.00110155
0.0723	1.00491	1.00177	1.00265	1.00009	0.997429	1.00076	1.00932	1.0041	0.999937	0.998401	0.99971	0.998298	1.00184	1.00156	1.00461		1.00166	0.000810092		1.00588	0.994328	1.00336	0.998477	0.992923	1.00006	0.996011	0.998957	1.01429	1.00507	1.00219	1.00324		1.00123	0.00168385		1.00072	1.00277	1.00177	1.00115	1.00581	0.998304		1.00175	0.00101336
0.0803333	0.997226	1.00027	1.00551	1.0036	0.997928	1.00135	1.00607	1.00685	0.998963	1.00225	0.999456	1.00182	1.00165	0.996292	1.00846		1.00156	0.000978871		1.00219	0.995976	1.00724	0.997899	0.989983	0.998206	0.995352	1.00077	1.01364	1.00246	1.00376	1.00454		1.001	0.00178024		1.00165	0.999007	1.0008	1.00166	1.00537	0.997173		1.00094	0.00113469
0.0883667	1.00047	0.999383	1.00635	1.00119	0.991633	0.994107	1.00496	1.00784	1.00127	1.00084	1.00415	1.00208	1.00267	0.999691	1.00303		1.00112	0.00110844		1.00576	0.995117	1.00885	1.00132	0.996464	1.00315	0.998441	1.00171	1.00794	1.0062	1.00459	1.00188		1.00262	0.00125726		0.998943	0.997564	0.995717	0.998068	1.00307	0.996154		0.998253	0.00108112
0.0964	1.00196	1.00047	1.00213	1.00093	0.993863	0.997278	1.00811	1.00262	0.995854	0.99765	1.00142	1.00193	1.00217	0.998134	1.00773		1.00084	0.00100382		1.00692	0.9974	1.00758	1.00398	0.989599	1.00563	0.995275	0.992247	1.00372	1.00478	1.00136	1.00171		1.00085	0.00170353		0.999407	0.998755	0.998923	0.998847	1.00253	1.00084		0.999885	0.0006174
0.104433	1.00322	0.999511	1.00693	1.00154	0.995033	0.995214	1.0077	1.00782	1.00036	1.00069	1.00054	0.998359	0.997815	0.998141	1.00233		1.00083	0.00106792		1.00058	0.993406	1.00554	1.00231	0.994312	0.997304	0.995608	0.997352	1.00845	1.00839	1.00191	1.00312		1.00069	0.00149587		0.999605	1.00181	0.999054	1.00022	1.00223	0.994131		0.999508	0.00118812
0.112467	1.00362	1.00039	1.00674	1.00221	0.99115	0.998928	1.00527	1.00321	0.99709	0.999321	1.00027	0.998183	0.997307	0.996272	1.0014		1	0.00102417		1.00514	0.99541	1.00418	0.997489	0.994438	0.999942	0.99532	0.994931	1.0105	1.00739	1.00471	1.00185		1.00094	0.0015802		1.00209	1.00104	0.997144	1.00032	1.00268	0.997175		1.00007	0.000980421
0.1205	1.0002	0.999667	1.00718	1.00074	0.992162	0.998074	1.0027	1.00271	0.996164	0.99986	1.00274	0.99873	1.00073	0.999269	1.00662		1.00038	0.000982473		1.00509	0.995211	1.00863	1.00267	0.996846	1.00197	0.996438	0.992473	1.00541	1.00703	1.00237	1.00121		1.00128	0.00145556		0.999004	1.00039	0.99801	0.998561	1.00269	0.99667		0.999221	0.000853046
0.128533	0.998161	1.00036	1.00573	1.00119	0.99324	0.999599	1.00298	1.0064	0.994874	0.999768	1.0003	0.998105	1.0015	1.0009	0.998467		0.999984	0.000907486		1.00701	0.998484	1.00826	1.0013	0.9951	1.0057	1.00229	0.993139	1.00508	1.00225	1.00256	1.00255		1.00198	0.00131191		0.996751	1.00031	0.997297	1.00022	1.00474	0.99975		0.999843	0.00116002
0.136567	1.00114	0.994266	1.00693	0.999818	0.989252	0.993274	1.00128	1.00562	0.99809	0.998634	1.00012	0.996225	1.00251	0.998369	1.00678		0.999443	0.00128826		1.01074	0.997012	1.00619	1.00329	0.99471	1.00027	0.996718	0.992451	1.00152	1.0082	1.00338	1.00191		1.00137	0.00158461		0.998112	0.999977	0.994245	0.999718	1.0038	0.998033		0.998981	0.00127596
0.1446	1.00002	1.00381	1.00734	1.00333	0.995525	1.00063	1.00843	1.00333	0.997551	0.9992	1.00239	0.998045	1.00144	1.00076	0.996536		1.00114	0.000968194		1.00684	0.999366	1.00625	0.999484	0.994272	0.997819	0.992074	1.00008	1.00728	1.01179	1.00585	1.00001		1.00176	0.00168792		1.00032	1.00374	0.99821	1.00176	1.00124	0.996908		1.00036	0.00101191
0.152633	0.999588	0.997891	1.00592	1.00342	0.995127	0.997922	1.00474	1.00561	0.996977	1.00066	1.00348	0.994854	0.999938	0.997391	1.00188		1.00018	0.000963771		1.00621	0.99701	1.00614	1.00242	0.995038	0.998601	1.00065	0.999163	1.00832	1.00526	1.00799	1.00118		1.00233	0.00127788		1.00114	1.00085	0.998177	0.999672	1.00445	0.998609		1.00048	0.000927538
0.160667	0.997913	0.998831	1.00344	0.998559	0.995394	1.00253	1.00601	1.00385	0.998075	1.00101	1.0034	0.99759	0.997379	0.995843	0.997357		0.999609	0.000851539		1.00584	0.99728	1.00912	1.00398	0.993466	0.998112	0.995177	0.991747	1.00494	1.00329	1.00552	0.999067		1.00063	0.00160491		1.00198	1.00408	0.998534	1.00188	1.00218	0.998436		1.00118	0.000914077
0.1687	0.998913	1.00098	1.00562	0.998581	0.989881	0.996542	1.00128	1.00786	1.00007	1.00307	1.00439	0.99985	0.999609	1.00024	1.00479		1.00044	0.0011068		1.00505	0.997896	1.00763	1.00243	0.990795	0.996605	0.995822	1.00143	1.00941	1.00342	1.00553	1.00152		1.00146	0.00155071		0.998184	1.00069	0.997325	0.998565	1.00756	0.998096		1.00007	0.00156765
0.176733	1.00118	0.99825	1.00534	1.00139	0.995765	0.999977	1.00849	1.00746	0.997974	1.00097	1.00683	1.00236	1.00163	0.998666	1.00442		1.00185	0.0010092		1.00884	1.00062	1.00611	1.00082	0.994395	1.00175	1.00158	0.999881	1.00314	1.00947	1.00342	1.00039		1.00253	0.00119287		0.99893	1.00198	0.997103	1.00057	1.00803	1.00205		1.00144	0.00152732
0.184767	0.99597	0.999048	1.00617	1.00066	0.991708	0.995046	1.00619	0.998325	0.996502	0.996205	1.00391	0.996071	1.00113	0.997986	1.00168		0.999224	0.00106065		1.0084	0.995786	1.00807	1.00055	0.990998	1.00269	0.997439	0.999796	1.0034	1.00475	1.00568	1.00202		1.00163	0.00147512		0.999398	1.00238	0.996357	0.996863	1.00134	0.996904		0.998873	0.001047
0.1928	1.0035	1.00129	1.00277	1.00313	0.99354	1.00004	1.00651	0.998479	0.995559	0.998299	1.00254	0.997167	1.00007	1.00175	1.00639		1.00071	0.000957178		1.00879	0.999527	1.00924	1.00312	0.995588	1.00177	0.996209	0.999499	1.00477	1.00548	1.00534	1.00066		1.0025	0.00128083		0.999278	1.00006	0.998482	0.999696	1.00872	1.00161		1.00131	0.00154085
0.200833	0.995581	0.998631	1.00249	1.0017	0.987989	0.999858	1.00621	1.00519	1.00176	1.0016	1.00476	0.997441	0.99807	0.998138	1.00123		0.999801	0.00116459		1.00926	0.999311	1.00781	1.00264	0.990937	1.00515	0.995738	1.00108	1.00452	1.00278	1.00454	1.00181		1.00213	0.00145571		0.999532	0.999144	0.997131	0.999528	1.0047	0.99994		0.999996	0.00102495
0.208867	0.997938	0.99723	1.00545	1.00134	0.99065	0.995149	1.00613	1.00293	0.997692	0.999815	1.00151	0.998152	0.999117	1.00227	1.0004		0.999595	0.00102191		1.00329	0.997028	1.01029	0.999628	0.993858	1.001	0.997594	0.998028	1.00325	1.00745	1.00604	0.999491		1.00141	0.00138399		0.99784	1.00059	0.997836	0.999739	1.00396	1.00025		1.00004	0.000921394
0.2169	0.997641	0.998576	1.00188	1.00154	0.992265	0.997433	1.00521	1.00154	0.999108	0.997756	1.00431	1.00175	0.996793	1.00578	1.00002		1.00012	0.000924588		1.00386	0.999323	1.00785	1.00005	0.991066	1.00147	0.995301	0.998791	1.00883	1.00116	1.00566	1.0032		1.00138	0.00145982		1.00162	1.00388	0.999054	1.00011	1.00509	0.999541		1.00155	0.00100564
0.224933	0.995787	0.99803	1.00607	1.00316	0.995353	1.00054	1.00545	1.00044	0.995058	0.997723	0.999752	1.00513	0.999257	1.00173	1.00302		1.00045	0.000937936		1.00371	0.999105	1.00809	1.0033	1.00034	1.00178	1.0009	0.993179	1.00218	1.00186	1.00576	1.00475		1.00208	0.00107866		0.998813	1.00002	0.998717	1.0011	1.00825	0.998462		1.00089	0.00152618
0.232967	0.994233	0.998554	1.0075	1.00411	0.993835	1.00015	1.00369	1.00141	0.999633	1.00232	1.00885	1.00348	0.997404	1.00231	1.00018		1.00089	0.00110645		1.00686	1.0006	1.01142	1.00455	0.994824	1.00365	0.996279	0.995531	1.01008	1.00145	1.00642	1.00221		1.00282	0.00157341		1.0017	1.00312	0.995283	1.00284	1.005	0.998364		1.00105	0.0014601
0.241	0.998749	0.997529	1.00129	1.00076	0.991099	1.00063	1.00314	1.00592	1.00463	0.99947	1.00598	1.00578	1.00228	1.00538	1.00632		1.00183	0.00109758		1.00185	0.998737	1.0069	0.999319	0.990233	1.00076	0.997746	0.992445	1.00963	1.00251	1.00347	1.00043		1.00034	0.00155963		1.00221	0.999042	0.995516	0.999138	1.00648	0.997358		0.999957	0.00158717
0.249033	0.999127	0.994511	0.99953	1.00033	0.997402	0.999726	1.00786	1.00553	0.997523	1.00136	1.00062	1.0011	0.998192	0.999167	1.00076		0.999956	0.000836053		1.00814	0.999809	1.0067	1.00161	0.99138	1.00117	0.998491	0.992019	1.00263	0.999756	1.00486	1.00031		1.00057	0.00146221		1.00217	0.998857	0.997126	0.998971	1.00297	1.00076		1.00014	0.000906086
0.257067	1.00225	1.00256	1.00455	1.00452	0.99347	1.00145	1.00645	1.00572	1.00158	1.00104	1.00635	1.00196	0.998169	0.999436	0.999835		1.00175	0.000926574		1.00404	0.997024	1.00555	0.999805	0.993255	1.00081	0.995556	0.995615	1.01308	1.00309	1.00447	1.00137		1.00114	0.00157627		1.002	0.998813	0.995743	1.0006	1.00562	0.995591		0.999728	0.00157562
0.2651	1.0004	1.00378	1.00358	1.00129	0.991898	0.995818	1.00215	1.00435	1.0004	1.00004	1.00676	0.999525	0.99701	0.998732	1.00061		1.00028	0.000964877		1.00134	0.9965	1.00407	0.999985	0.994007	1.00555	0.998896	1.00014	1.00308	1.00379	1.0053	1.00161		1.00119	0.00101554		1.00163	0.997679	0.994098	0.999124	1.00195	0.998697		0.998863	0.00117456
0.273133	1.00103	0.994666	1.00396	1.00166	0.98943	0.997412	1.00097	1.00067	0.999152	0.995906	1.00177	1.00342	0.999812	1.00287	1.00433		0.999942	0.00101048		1.00656	0.998126	1.00443	1.00262	0.992665	1.00064	0.997182	0.999964	1.00709	1.00218	1.0053	1.00295		1.00164	0.00121428		0.997956	0.999254	0.994341	0.999242	1.00802	0.998397		0.999534	0.00185199
0.281167	1.00027	0.992621	1.00366	1.00428	0.997138	1.00059	1.00261	1.0016	0.99912	0.998531	1.00372	0.99967	0.998513	1.00273	1.00104		1.00037	0.000791979		1.00518	1.00169	1.00568	1.00561	1.00206	0.999849	1.00021	0.999653	1.00249	1.00133	1.00585	1.00476		1.00286	0.000698251		1.00047	1.00125	0.996387	0.99315	1.00592	0.995672		0.998808	0.00188859
0.2892	1.00021	0.996638	1.00224	1.00184	0.989613	0.999125	1.00379	0.999906	0.998516	0.996595	1.00321	0.998609	0.997608	1.00008	0.998013		0.999158	0.000874066		0.997553	0.993826	0.999542	0.999266	0.989754	0.998992	0.994622	0.993643	0.998635	1.00498	1.0071	1.00296		0.998407	0.00144503		1.00313	0.998874	0.996602	0.999304	1.00309	0.998178		0.999863	0.00109332
0.297233	0.999873	0.994792	1.00079	1.00074	0.989965	1.00246	1.00701	1.00235	0.999019	0.997139	1.00205	1.00061	0.998219	0.999452	0.999645		0.999662	0.000978938		1.00257	0.996772	1.00589	1.00328	0.99735	1.00155	1.00109	0.994109	1.00173	0.999494	1.00626	1.00274		1.00107	0.00104481		1.00426	1.00242	0.996027	0.999335	1.00103	0.998593		1.00028	0.00119463
0.305267	1.00527	0.997236	1.00177	1.00463	0.993087	0.996483	1.00249	1.00084	0.997653	0.998108	0.999803	0.999356	0.995218	1.00249	1.00181		0.99974	0.000895619		1.00326	1.00013	1.00624	1.0037	1.00394	1.00171	0.999704	0.999831	1.00169	1.0068	1.00722	1.00442		1.00322	0.000769423		0.998888	0.997351	0.995456	0.999254	1.00171	0.998789		0.998575	0.000850087
0.3133	0.998765	0.995961	1.00064	1.00277	0.991346	0.999116	1.00568	1.00208	0.997626	0.99824	1.00369	1.0008	0.996352	0.999162	1.00171		0.999577	0.000916653		1.00556	0.996793	0.999176	1.00073	1.00029	0.999831	0.999227	1.00427	1.00143	1.00301	1.0069	1.00378		1.00175	0.000860259		1.00226	0.999888	0.998911	0.998657	1.00195	0.996774		0.999741	0.000854849
0.321333	1.0032	0.997731	1.00113	1.00229	0.995583	1.00331	1.005	1.00306	0.999507	0.998333	1.0041	1.00554	0.997137	1.00319	1.00216		1.00139	0.00079423		1.00391	0.996537	0.998931	1.0027	0.997967	1.00325	0.996949	0.999732	1.0044	1.00541	1.00432	1.003		1.00143	0.000920175		1.00155	1.00069	0.99774	1.00058	1.00409	0.998833		1.00058	0.00090158
0.329367	1.00292	0.996907	1.0017	0.99852	0.993767	0.997546	1.00661	1.0014	0.997969	0.999502	1.00173	1.0034	0.997722	1.00067	1.00044		0.99995	0.000822945		1.00246	0.997936	1.00403	1.00353	0.994439	1.00142	0.997933	0.998078	1.00804	1.00346	1.00334	1.00457		1.0016	0.00109309		1.00131	1.0002	0.995868	0.997841	1.00385	0.999418		0.999747	0.00112888
0.3374	0.999621	1.00052	1.00173	1.00299	0.995467	1.00025	1.00465	1.00062	0.999708	0.997124	1.00145	1.00074	0.99517	1.00287	1.00095		1.00032	0.000665041		1.00578	0.99789	0.998858	0.998757	0.998143	0.997669	0.996142	0.995707	1.00161	1.00672	1.00373	1.00386		1.0004	0.00109213		1.00163	0.999744	1.00014	0.998948	1.00337	0.999929		1.00063	0.000654847
0.345433	1.00458	1.00121	0.999879	1.00265	0.997815	1.00477	1.01168	1.00179	0.996266	0.997092	1.0045	0.997823	0.99636	1.0022	1.00146		1.0014	0.00104791		1.0032	0.999223	0.99902	1.00139	0.999441	1.0032	0.994204	0.996693	1.00574	1.00373	1.00519	1.0042		1.00127	0.00103344		1.00694	1.0016	0.997758	1.00042	1.00347	0.99778		1.00133	0.00144168
0.353467	0.997849	1.00091	1.00187	1.00202	0.995071	0.996489	1.00543	1.001	0.997665	0.996619	1.00043	1.00248	1.00004	1.00307	1.00207		1.00029	0.000718982		1.00395	1.00148	1.00337	1.00418	0.999553	1.00438	1.00124	0.99439	1.00227	1.00957	1.00374	1.00317		1.00261	0.00102329		0.999797	1.00133	0.995336	0.998198	1.00385	0.997518		0.999338	0.00122703
0.3615	1.00013	0.99982	1.0041	1.00063	0.994653	0.999241	1.01116	1.00025	1.00075	0.995051	1.00507	1.00559	1.00155	1.00168	1.00618		1.00192	0.00102578		1.00078	0.997899	0.996416	0.997115	0.991721	1.00003	0.995085	0.993272	1.00241	1.00987	1.00284	1.00296		0.999199	0.00144705		1.00081	1.00114	0.994895	0.996254	1.00658	0.995368		0.999174	0.00185006
0.369533	1.00018	0.999306	1.00108	0.999509	0.991947	1.00036	1.00079	0.999664	0.996773	0.998421	1.00206	1.00181	0.996086	1.00171	0.99946		0.999247	0.000689091		1.00512	0.997851	0.99971	0.997479	0.997308	1.00167	0.996053	0.990251	1.00164	1.00181	1.00341	1.00333		0.999636	0.00118395		1.00159	0.998496	0.998994	0.994242	1.00403	0.995733		0.998847	0.00147641
0.377567	1.00124	1.00283	0.998524	1.00123	0.996794	1.01336	1.00174	1.00056	0.997645	0.997364	1.00319	1.00125	0.995126	1.00056	0.998146		1.00068	0.00108545		1.00139	0.997902	0.999344	1.0014	0.993647	1.00402	0.996309	0.995162	1.01018	1.00636	1.00599	1.00456		1.00136	0.00145902		0.997383	0.998358	0.995387	0.997753	1.00108	0.996643		0.997768	0.000783779
0.3856	1.00521	1.00001	1.0024	1.00383	0.995751	1.00098	1.00386	1.00173	0.99775	1.00062	1.00541	1.00196	0.995978	1.00024	1.00226		1.00102	0.00079428		1.00141	0.999169	1.0005	1.00057	1.00494	1.00066	0.998165	1.0068	1.00612	1.00991	1.00292	1.00682		1.00317	0.00105917		1.00123	0.99963	0.995292	1.00029	1.00242	0.998093		0.999492	0.00103065
0.393633	1.00078	0.99731	1.00252	1.00126	0.993831	1.0045	1.00631	1.00152	0.998877	0.9966	1.00389	1.00136	0.996824	1.00449	0.998629		1.00067	0.000883709		1.00633	0.999861	1.00215	1.00387	1.0008	1.00676	0.994494	0.993125	1.00074	1.00627	1.00486	1.0039		1.00193	0.00128378		1.00042	1.00133	0.996366	1.00224	1.00208	0.99924		1.00028	0.000905825
0.401667	1.005	1.00124	1.00148	1.00151	0.995594	1.00335	1.00296	1.00367	0.996111	0.994827	1.00262	1.0032	0.998699	0.999146	1.00228		1.00099	0.00073416		1.00276	0.998865	1.00254	1.00139	1.00187	1.0012	0.994564	0.998454	1.0038	1.00249	1.0049	1.00422		1.00142	0.000836645		1.00074	0.99914	0.994412	0.999462	1.00115	0.997755		0.998776	0.00100304
0.4097	1.00312	0.996722	0.99863	1.00133	1.00172	1.00576	1.00437	1.00452	0.997276	0.999231	1.00341	1.00815	0.998964	1.00457	1.00191		1.00189	0.000876086		1.00024	0.998704	1.00415	1.00037	0.997243	1.00293	1.00027	1.0005	1.00019	0.999323	1.00786	1.00313		1.00124	0.000821502		1.00251	1.00248	0.99929	1.00063	1.00603	0.998636		1.0016	0.00109967
0.417733	0.996911	1.0005	1.00266	1.00055	0.998075	1.0013	1.00757	1.0028	0.999216	0.996477	1.00767	0.999936	1.00029	1.00469	1.00336		1.00157	0.00083905		1.00723	1.00253	1.00256	1.00199	0.999401	1.00306	0.999973	0.99787	0.999028	1.00154	1.00617	1.00535		1.00223	0.000844057		1.00128	1.00048	0.99762	0.998195	1.00131	1.00007		0.999825	0.000640701
0.425767	1.00115	1.00101	0.999188	1.00075	0.997813	1.00454	1.00518	0.999208	0.997566	0.998458	1.0031	1.00794	0.997151	1.00393	1.00351		1.00133	0.000840339		1.00217	0.998837	0.999307	1.00199	0.999093	0.996688	0.99893	0.99763	0.996281	1.00329	1.00365	1.00567		1.00029	0.000862246		1.0051	0.999565	0.995817	1.00237	1.00621	0.998277		1.00122	0.00165162
0.4338	0.997594	1.00353	1.0025	1.00206	0.996413	1.0048	1.00636	1.00246	0.997777	0.999546	1.00289	0.998382	0.99727	1.00216	1.00105		1.00088	0.000795083		1.00258	0.999514	1.00096	1.00155	1.00561	0.998237	0.998297	1.00221	0.999746	1.00576	1.00665	1.00246		1.00196	0.000824844		1.00013	1.00128	0.998422	1.00245	1.00121	0.997884		1.00023	0.000725526
0.441833	1.00355	0.999816	0.999041	1.00287	0.999139	1.00351	1.00544	1.00574	1.00068	0.999752	1.00472	1.00237	0.998739	1.00365	0.999128		1.00176	0.000687351		1.00389	0.999447	1.00519	1.0053	1.004	1.00144	0.995401	0.999424	1.00246	1.00813	1.00798	1.00452		1.0031	0.00106995		1.00104	1.00235	0.999409	0.998838	1.00584	1.00236		1.00164	0.00103034
0.449867	1.00619	0.996058	1.00114	1.00172	1.00021	1.00425	1.00329	1.00019	0.999611	0.99383	1.002	1.00634	0.996797	1.00204	1.00063		1.00123	0.000779873		1.00681	1.00057	1.00241	1.001	1.00687	0.998425	0.996563	0.996341	1.00069	1.00999	1.0057	1.00484		1.00252	0.0012569		1.00355	0.999851	0.997781	1.00109	1.00399	0.999404		1.00094	0.000994468
0.4579	1.0012	1.00055	1.00131	1.00104	0.999147	0.998821	1.00358	1.00044	1.0036	0.997546	1.0025	1.00041	0.996928	1.00015	1.00124		1.00059	0.000482409		1.00004	0.999451	1.00314	1.00532	1.0019	0.998718	1.00137	1.00429	1.00002	1.00885	1.00385	1.00311		1.00251	0.000833006		1.002	0.998561	0.998892	1.00029	1.00481	0.99924		1.00063	0.000977935
0.465933	1.00461	0.996887	1.00174	1.00215	0.997579	1.00264	1.00045	1.00206	0.998069	0.997159	1.00297	0.999567	0.992781	1.00445	1.00478		1.00058	0.000879607		1.00623	1.00158	1.00204	1.00339	1.007	1.00203	0.99978	1.00446	1.0049	1.0067	1.0064	1.00173		1.00385	0.000700146		1.00293	1.00006	0.999214	0.998006	1.00358	0.998321		1.00035	0.000966631
0.473967	1.00201	0.998137	1.00021	1.0024	0.997825	0.999349	1.00555	1.00153	1.00048	0.996611	1.00019	0.998436	0.994313	1.00021	0.999619		0.999881	0.000657533		1.00787	0.999063	1.00245	1.00528	1.00885	1.00376	1.00036	0.994302	0.995837	1.00041	1.00246	1.00224		1.00191	0.0012515		1.00048	1.00263	0.995983	1.00112	1.00048	1.00099		1.00028	0.000918372
0.482	1.00225	1.00097	0.999673	0.999065	0.998279	0.998755	1.00251	1.00197	1.00081	0.997381	1.00602	1.00462	0.997403	1.00161	0.999244		1.00074	0.000638617		0.998464	0.998664	0.997815	0.997447	1.00171	0.996277	0.993815	1.0049	1.00367	1.01031	1.00119	1.00111		1.00045	0.0012749		1.00056	0.998659	0.995512	0.99719	1.00285	0.997951		0.998787	0.00105913
0.490033	1.00407	0.999715	1.00003	1.00101	0.996589	1.00376	1.00593	1.00605	1.00259	0.997163	1.00267	0.999169	0.993553	1.0022	0.993034		1.00056	0.00103313		1.00705	1.00228	1.00069	0.999736	1.00381	1.00433	0.999544	0.995218	0.996999	1.00571	1.0033	1.00259		1.00177	0.00100492		1.00447	1.00192	0.99695	1.00359	1.00141	0.999276		1.00127	0.00113563
0.498067	1.00295	1.00233	0.999262	0.999149	0.995666	1.00492	1.0042	1.00394	1.00313	0.994309	1.00319	1.00332	0.996178	1.0014	1.00113		1.00125	0.000759511		1.00502	0.999882	1.00284	0.999633	1.00015	0.998598	0.995691	1.00149	1.0018	1.00747	1.00451	1.00127		1.00153	0.000909376		1.00066	1.0006	0.996593	1.00182	0.99876	1.00019		0.999769	0.000752136
0.5061	1.00556	0.999307	1.00045	1.00014	0.998777	1.00408	1.00285	0.997356	0.996511	0.989423	1.00202	1	0.993877	1.00048	0.995253		0.999643	0.000827161		1.00128	1.00015	0.997796	1.00257	1.00636	1.00058	0.997735	0.999036	1.00283	1.00495	1.00109	1.0029		1.00144	0.000764594		1.005	1.00158	0.999486	1.00267	1.00161	0.99776		1.00135	0.0010257
0.514133	1.00252	0.999142	1.00415	1.00265	1.00012	0.999385	0.997007	1.00196	1.00016	0.993024	1.00456	1.00526	0.998438	1.00478	1.00243		1.00137	0.000691017		1.00554	1.00089	0.997512	1.00484	1.00725	0.998419	0.996901	1.00151	1.00185	1.00659	1.00504	1.00186		1.00235	0.00102046		1.00157	1.00068	0.997078	1.00145	1.00124	1.00185		1.00065	0.000731135
0.522167	1.00341	1.00488	1.00051	0.9987	0.989065	0.989477	0.996362	0.999331	1.0009	0.994408	1.00133	1.00587	0.994603	1.00381	1.00073		0.99913	0.0013009		1.0044	0.997918	0.992403	1.00398	1.00135	1.00063	0.996561	0.998844	1.0092	1.01487	1.00514	1.0024		1.00231	0.00171189		0.998317	0.994855	0.992552	0.996115	1.00325	1.00121		0.997716	0.00163903
0.5302	1.00291	1.00794	1.00445	1.00246	1.00009	1.00289	1.00318	0.999855	1.00237	0.994411	1.00179	1.00418	0.99577	1.00216	0.997894		1.00173	0.000782196		1.00357	1.00039	0.999683	1.00784	1.00453	1.00472	0.999063	0.997163	0.996506	1.01285	1.00457	1.00261		1.00279	0.00134187		1.00203	0.999403	0.997584	1.00191	1.00212	1.0008		1.00064	0.000744857
0.538233	1.0064	0.999391	1.00343	1.00039	0.997662	0.999151	1.00166	1.00127	1.00076	0.995199	1.00354	1.00605	0.998275	1.00295	0.998327		1.00115	0.000731286		1.00216	0.997914	0.999306	1.00167	1.00028	1.00114	0.995492	1.0047	0.998757	1.00526	1.00481	1.00345		1.00124	0.00087797		1.00155	1.00291	0.997538	1.00221	1.00193	1.00241		1.00143	0.000799288
0.546267	1.00038	0.998073	1.00465	1.00112	1.00332	1.00305	1.00266	0.997815	1.00195	0.993846	1.00561	1.00334	0.996721	0.999312	1.00063		1.00111	0.000699365		1.00089	0.99826	0.992761	1.00479	0.998259	0.995599	0.993097	0.992035	0.993677	1.00395	1.00423	1.0032		0.998395	0.00141812		1.00406	1.00079	0.998421	1.00148	0.999434	0.99951		1.00062	0.00081862
0.5543	1.00746	1.00088	1.00268	1.00127	0.995403	1.00312	1.0049	1.0039	1.00319	0.992839	1.00526	1.00171	0.999335	1.00112	0.99799		1.00175	0.000817022		1.00005	0.996992	0.996449	1.00565	1.00318	0.999727	0.993712	1.00235	0.996414	1.00751	1.00599	1.0025		1.00088	0.00126451		1.00359	1.00055	0.996567	0.999557	1.00194	1.00022		1.0004	0.000966156
0.562333	1.00062	0.999634	1.00228	0.998346	1.00208	1.00279	1.00496	0.999121	1.00103	0.99089	0.996327	1.00371	0.996232	1.00458	0.999293		1.0006	0.000719385		0.99896	0.997205	0.995568	1.00378	1.00582	0.99854	0.996496	1.00111	0.992616	1.00798	1.00544	1.00378		1.00061	0.00137618		1.00424	1.00175	0.995657	1.00082	0.998694	0.998147		0.999884	0.00123306
0.570367	1.0027	1.00304	1.00248	0.996103	1.00454	1.00474	1.00204	1.00461	1.00305	0.995745	1.00538	1.00446	0.995792	0.998623	1.00398		1.00197	0.000833963		0.997897	0.998932	0.996176	1.00216	1.00701	0.993623	0.993352	1.00154	0.997282	1.00669	1.0049	1.00394		1.00029	0.00138115		1.00137	1.00066	0.99454	1.00256	0.999158	0.998928		0.999537	0.00114365
0.5784	1.00192	0.999919	1.00108	0.998738	0.98928	0.989886	0.991214	1.00159	0.999823	0.992341	0.999547	1.00686	0.998051	1.00306	1.00435		0.998886	0.00132434		1.00017	0.997927	0.993414	1.00377	0.998041	0.995125	0.996054	1.002	1.00133	1.0052	1.00418	1.00346		1.00006	0.00112601		0.994753	0.995754	0.99114	0.992745	0.997387	0.997615		0.994899	0.00105024
0.586433	0.996158	0.99581	1.00078	0.999347	1.00203	1.00526	1.00273	0.993928	1.00178	0.99419	1.00224	1.00298	0.997676	1.00364	1.00581		1.00054	0.000922418		0.997605	0.99843	0.99607	1.00103	0.998172	0.996301	0.99642	1.00585	0.994342	0.99584	1.00514	1.00362		0.999067	0.00112514		1.00258	1.00027	0.998958	1.0033	0.998005	0.998483		1.00027	0.00090485
0.594467	0.928679	0.928849	1.002	0.998691	1.00214	1.00219	1.00446	0.999406	1.00204	0.994614	1.00459	1.00568	0.998567	1.00292	1.00317		0.99209	0.00666482		1.00233	0.994928	0.993547	1.0022	1.00117	0.995421	0.988029	0.945237	0.920102	0.888959	1.00507	1.00326		0.978354	0.0111362		1.00205	1.00183	0.997496	1.00006	0.997865	1.00221		1.00025	0.000873345
0.6025	0.989636	0.984864	1.00215	1.00186	1.00413	1.00815	1.00355	0.994554	1.00062	0.990383	1.00306	1.00575	1.00021	1.00102	1.00235		0.999991	0.00157928		1.0035	0.997201	0.990306	1.00335	1.00098	0.996992	0.994882	1.01314	0.995953	0.972843	1.00626	1.00559		0.998417	0.00292393		1.00289	1.00216	0.999301	1.00434	0.997071	1.00181		1.00126	0.00107514
0.610533	0.98908	0.990119	1.0012	1.00065	0.99801	1.0016	0.998624	0.997747	1.00184	0.99427	1.00069	1.0037	0.997329	1.00119	1.00167		0.998761	0.00107394		0.997793	0.996931	0.993516	0.996537	0.993896	0.992071	0.994351	0.996696	0.991007	0.982329	1.00581	1.00459		0.995461	0.00176682		1.00326	0.999377	0.995002	1.00119	0.99635	0.998859		0.999006	0.00123954
0.618567	0.995068	0.992565	1.00213	0.999782	1.00515	1.00873	1.00869	0.998578	1.00178	0.995371	1.00079	1.00288	0.996669	1.00265	0.999816		1.00088	0.0011691		1.00145	0.995619	0.995345	1.00125	1.00121	0.999354	0.996632	0.99776	0.99272	0.985696	1.00636	1.00243		0.997986	0.00155218		1.00717	1.00227	0.999108	1.00393	0.998347	1.00053		1.00189	0.00134551
0.6266	0.993117	0.9929	1.00216	0.998423	1.00093	1.00179	0.998707	0.998675	1.00422	0.995376	1.00282	1.00274	0.999724	1.0058	1.00504		1.00033	0.000993389		0.99907	0.998984	0.993823	1.0003	1.0063	1.00129	0.998658	0.995437	0.991426	0.993707	1.00425	1.0041		0.998946	0.00134507		1.00383	1.00033	0.996409	0.999028	1.00104	1.0026		1.00054	0.00107613
0.634633	0.996881	0.997167	1.00096	1.00042	1.0048	1.00535	1.00285	0.996943	1.00524	0.995313	1.00282	1.00289	0.996076	1.00253	1.00254		1.00103	0.000840138		1.00015	0.994344	0.99652	1.00257	1.0014	0.99619	0.993653	0.994547	1.00003	0.993305	1.00036	1.00262		0.997974	0.00102908		1.00345	1.00008	0.99895	1.00412	0.996527	0.998613		1.00029	0.00120373
0.642667	0.997887	0.995872	1.00529	0.999007	1.00109	0.997292	0.998087	0.998266	1.00409	0.993868	0.999519	1.00894	0.996264	1.00321	1.00379		1.00044	0.000981886		1.00053	0.998246	0.996395	1.0035	1.00455	0.995888	0.99621	0.998179	0.992596	0.995956	1.00114	1.00199		0.998765	0.00103699		1.00154	0.999471	0.996321	1.00222	0.998158	1		0.99962	0.000888224
0.6507	1.00145	0.999339	0.998046	0.998865	1.00404	1.00104	1.00378	0.999436	1.00022	0.993135	1.00064	1.00354	0.998137	1.00545	1.0054		1.00116	0.000686883		1.00276	0.997194	0.993905	1.00304	1.00548	0.998506	0.995269	0.997322	0.999917	0.994961	1.00229	1.00135		0.999332	0.00106885		1.00101	1.00131	0.998979	1.00531	0.998702	1.00056		1.00098	0.000969382
0.658733	0.996187	0.991851	0.998475	0.998731	1.00182	1.00366	1.0007	0.997944	1.00139	0.995243	0.99941	1.00741	0.998068	1.00398	1.00092		0.999901	0.000945785		0.999254	0.99468	0.996091	1.00168	1.0024	1.00093	0.996703	0.991517	0.995816	0.993188	1.0012	1.00293		0.998032	0.00111435		1.00448	0.999282	0.996968	1.00283	0.997921	1.00125		1.00046	0.00118969
0.666767	0.992935	0.991954	1.00044	0.998293	1.0013	1.00688	1.00299	0.997914	1.00226	0.997254	1.00039	1.00212	0.998307	1.00417	0.999951		0.999858	0.00100946		0.99484	0.996931	0.994385	0.996426	0.995741	0.994438	0.993176	0.99076	0.992429	0.999511	1.00161	1.0031		0.996112	0.00106505		1.00526	1.00324	0.997498	1.00297	0.99649	1.00235		1.0013	0.00142549
0.6748	0.999873	1.0012	0.999261	0.997437	1.00267	1.00535	1.00152	0.998085	1.0045	0.994938	1.00072	1.00098	0.995609	1.00144	0.996618		1.00022	0.000717932		1.00484	0.99911	0.992988	0.995267	1.00068	0.998997	0.993797	0.997007	1.00396	1.00123	1.00212	1.00289		0.999406	0.00113638		1.00301	0.998999	0.998229	1.00035	0.996393	1.001		0.999664	0.000942367
0.682833	0.997225	0.998681	1.00367	0.995521	1.00081	1.00112	1.00377	1.00004	1.00499	0.995246	0.99958	1.00484	0.996851	1.00263	1.00409		1.00079	0.000805019		0.99618	0.995586	0.993265	0.998081	1.00445	0.995601	0.992243	0.99858	1.00093	0.996207	1.00326	1.00126		0.997971	0.00110961		1.00299	0.999993	0.995812	1.00197	0.995944	0.999922		0.999438	0.00122339
0.690867	0.997	1.00183	1.00029	0.994938	1.00529	1.01093	1.01013	1.00005	1.00104	0.992962	0.999042	1.00098	0.999669	1.0007	0.99966		1.0013	0.00113514		0.999635	0.996991	0.994083	0.997547	1.0068	0.995207	0.997383	0.995585	0.999845	1.01277	1.00144	1.00163		0.999909	0.00154123		1.00618	1.00371	1.00089	1.00419	0.998004	0.999689		1.00211	0.00126096
0.6989	0.999436	1.0015	1.00141	0.993744	1.00228	1.00735	1.00433	0.996748	1.00087	0.995818	0.996567	1.00148	0.996088	1.00263	0.999656		1.00014	0.000908267		0.99784	0.993168	0.995047	0.996816	1.00503	0.996716	0.994548	1.0026	0.998985	1.00374	1.00246	1.00028		0.998936	0.00112176		1.00707	1.00255	0.998772	1.00413	0.994319	1.00012		1.00116	0.00181913
0.706933	0.997149	1.00287	1.00084	0.994518	0.99887	1.00395	1.00207	0.998502	1.00563	0.997383	0.999899	0.999691	0.994703	1.00313	1.00346		1.00022	0.000860561		1.00138	0.99784	0.99335	0.999087	1.00645	0.997098	0.998447	1.00012	0.994273	1.00429	0.998027	0.999835		0.999183	0.00107036		0.999992	0.999708	0.997689	1.00219	0.996894	0.996671		0.998857	0.000877235
0.714967	0.999641	0.997322	1.00385	0.996284	1.00647	1.00904	1.00969	0.997193	1.00282	0.999568	0.999987	1.00137	0.999085	1.00247	1.00445		1.00184	0.00109319		0.998031	0.996464	0.99228	0.996292	1.00368	0.995971	0.994672	0.997286	0.998557	1.00046	0.998592	1.00256		0.997903	0.000926511		1.00484	1.00186	1.00002	1.00566	0.999563	1.00214		1.00235	0.00101113
0.723	0.996731	0.99815	1.00053	0.997974	1.00348	1.008	1.00555	0.99817	1.00224	0.998257	1.00005	1.00144	0.998177	1.00314	0.998034		1.00064	0.000847645		0.997401	0.995899	0.991484	0.997946	1.00765	0.998916	0.996801	0.99876	0.99459	1.00304	1.00256	1.00405		0.999092	0.00130104		1.00509	1.00207	0.996823	1.00442	0.996069	1.00194		1.00107	0.00155126
0.731033	0.99987	1.00582	1.00007	0.995588	1.00351	1.00508	1.00762	0.993913	1.00209	0.996359	1.00103	0.999136	0.998708	1.00048	1.00636		1.00115	0.0010224		0.998449	0.995868	0.99637	1.00233	1.00869	0.996075	0.996145	1.00409	0.99844	1.00298	1.00113	1.0031		1.00031	0.00117305		1.00418	1.00054	1.00119	1.00187	0.995431	1.00185		1.00084	0.00119325
0.739067	0.999292	1.00062	1.00194	0.996494	0.998261	1.00359	1.00392	0.995326	1.00466	0.996004	0.996293	1.00293	0.997932	1.00408	0.999219		1.00017	0.00081435		0.999295	0.996733	0.993951	0.994923	1.00617	0.996788	0.994177	1.00206	0.998783	0.998757	1.00234	1.00335		0.998943	0.00112263		1.00179	0.999587	0.999183	1.00263	0.996915	1.00184		1.00032	0.000879659
0.7471	0.998299	0.998633	1.00212	0.995992	1.00285	1.00917	1.00988	0.996772	1.00085	0.996965	0.997112	1.00128	0.99847	1.00069	1.00252		1.00084	0.00106687		0.998576	0.997522	1.0003	0.997505	1.0049	0.998327	0.996347	1.00286	0.998548	0.9964	1.00118	1.00189		0.999529	0.000779278		1.00352	0.998201	0.997336	1.00256	0.996636	1.0014		0.999943	0.00119132
0.755133	0.99931	0.999532	1.00149	0.996935	1.00377	1.00726	1.00588	0.995505	1.00061	0.994236	1.00063	1.00122	0.999034	1.00329	1.00062		1.00087	0.000819848		1.00422	0.99886	0.991052	0.999969	1.01093	0.998835	0.997866	0.992185	0.995877	1.00129	1.00056	1.00232		0.999498	0.00152523		1.00338	1.00099	1.00042	1.00292	0.995971	1.00069		1.00073	0.00107413
0.763167	1.0014	0.998678	1.00151	0.99524	0.996267	1.00318	0.999634	0.993078	0.999161	0.994964	0.995823	1.00316	0.999269	1.00536	1.00521		0.999662	0.000945446		1.00026	0.998692	0.999431	0.998254	1.01067	0.995944	1.0024	1.00207	1.00038	1.00546	0.997735	1.00292		1.00118	0.00114252		1.00021	0.998123	0.995803	1.00202	0.999146	1.00354		0.999807	0.00112983
0.7712	0.997976	1.00002	1.00422	0.992266	1.00232	1.00767	1.00531	0.996195	1.00052	0.997725	1.00024	0.999018	0.999958	1.00242	0.99907		1.00035	0.000973468		1.00126	0.999093	0.994179	1.0038	1.01175	1.00114	1.00026	0.997565	0.997153	1.00289	1.00201	1.00295		1.00117	0.00125766		1.00354	1.00277	1.00123	1.00558	0.99578	0.999365		1.00138	0.00141083
0.779233	0.998775	0.995328	0.998196	0.997515	1.00021	1.00744	1.00187	0.994913	1.0026	0.998019	1.00052	1.00292	1.00038	1.00414	1.00158		1.00029	0.000861376		0.996094	0.998103	0.993762	1.00034	1.00533	0.998062	0.992434	0.993083	0.996292	0.999052	1.00469	1.00487		0.99851	0.00131689		1.00232	1.0008	0.99914	1.0043	0.999411	1.00041		1.00106	0.000795765
0.787267	0.99877	0.9968	0.998551	0.997162	0.999448	1.00958	1.00446	0.994367	1.00167	0.994085	0.998896	1.00098	0.996686	1.0025	0.998477		0.999754	0.000959681		0.998221	0.998662	0.996264	0.996619	1.00465	0.995435	0.996817	0.998893	0.995139	1.00188	1.00111	1.00052		0.998684	0.000834893		1.00367	0.998104	0.997508	1.00507	0.9976	1.00128		1.00054	0.00134981
0.7953	0.99656	0.994672	0.999545	0.994151	1.00233	1.00601	1.00148	0.994994	1.00343	0.994943	1.0015	0.999987	0.999992	1.00393	1.00047		0.999801	0.000917084		0.999419	0.999147	0.997392	1.0012	1.00696	0.99783	1.00084	0.994246	0.994526	1.00142	1.00099	1.00137		0.999611	0.000989372		1.00308	0.999113	0.997917	1.00602	0.999031	1.00017		1.00089	0.00125224
0.803333	0.996668	0.997463	0.99678	0.995509	1.00066	1.00732	1.00403	0.992857	1.00103	0.996918	1.00071	1.00062	0.997319	1.00357	0.998214		0.999382	0.000958303		0.996803	0.996883	0.998905	0.999442	1.01394	1.00142	0.995299	0.997008	1.00246	1.00304	1.003	1.00139		1.0008	0.00142321		1.0036	1.00241	1.00228	1.00567	0.998841	0.997832		1.00177	0.00120144
0.811367	0.997238	0.995189	1.00052	0.994897	1.00817	1.00596	1.00454	0.995028	1.00104	0.995169	1.00314	1.00229	0.998199	1.00133	0.999155		1.00031	0.00104497		0.998335	0.995572	0.99488	1.00018	1.01101	0.998989	0.996944	0.994304	0.995349	1.00291	0.999057	1.00381		0.999278	0.00138109		1.0006	1.00035	0.997316	1.00323	0.999738	0.997708		0.999823	0.000880699
0.8194	1.00111	0.997654	1.00049	0.99369	0.997213	0.99966	1.00002	0.998619	0.999502	0.995228	1.00256	1.00227	1.00094	1.00167	0.9992		0.999504	0.000590723		0.999299	0.998149	0.994412	0.996956	1.01098	0.997695	0.995289	1.00239	1.00254	1.00557	1.00053	1.00214		1.00049	0.00134145		0.999088	0.997848	0.997624	1.00274	0.99833	0.998992		0.999103	0.000765654
0.827433	0.997514	0.999564	1.0021	0.993538	1.00205	1.00204	1.00116	0.996054	1.00219	0.998179	1.00183	0.998853	1.00038	1.00282	0.996818		0.999659	0.000716851		0.998768	0.998996	0.996945	1.00127	1.0024	0.998298	0.997348	0.99388	0.995648	1.0061	0.999467	1.00364		0.999397	0.000999756		1.0039	1.00021	0.996611	1.00199	0.998714	0.999428		1.00014	0.00104159
0.835467	0.994198	0.997199	0.995534	0.997337	0.998583	1.00209	0.999893	0.994538	1.00104	0.995712	1.00396	1.00299	1.00102	1.00243	1.00695		0.999715	0.000947564		0.996271	0.99952	0.998768	0.996972	1.01347	1.00232	0.999675	0.995401	0.996538	1.0008	1.00106	1.00144		1.00019	0.00137113		1.00449	0.997285	0.995392	1.0049	0.998002	1.00101		1.00018	0.00160831
0.8435	0.995786	0.997225	1.00309	0.998256	1.00717	1.00906	1.00539	0.991569	1.00076	0.992457	1.00385	1.0067	1.00126	1.00563	1.00286		1.00177	0.00125446		0.992855	0.996621	0.992298	0.995519	1.00791	0.995828	0.996776	0.998248	0.99617	1.00432	1.00161	1.00225		0.998368	0.00136053		1.00574	1.00067	0.999601	1.00702	0.998919	1.00309		1.00251	0.00136513
0.851533	0.991774	0.998174	0.999641	0.995796	0.996382	0.999007	0.997774	0.997489	1.00052	0.994075	1.0034	1.00452	1.00455	1.00439	1.00086		0.999482	0.000943983		0.99754	1.0014	1.0012	1.00049	1.00773	0.995309	1.00487	0.996255	1.00059	1.01039	1.00404	1.00236		1.00185	0.00128612		1.00045	0.999143	0.996494	1.00345	1.00065	0.999976		1.00003	0.000923028
0.859567	0.992064	0.997267	1.00141	0.996889	1.00111	1.0018	1.00267	1.00293	1.00227	0.998329	1.00405	1.00216	0.999421	1.00709	1.00247		1.00077	0.000926965		0.997587	0.998541	0.995064	0.997727	1.0086	0.999686	0.997475	0.994999	0.997696	1.00639	1.00051	1.0028		0.999757	0.00122013		1.00266	1.00245	0.997532	1.00362	1.00232	0.999232		1.0013	0.000967527
0.8676	0.99174	0.996535	1.00296	0.995957	1.00243	1.00503	1.00591	1.00163	1.00233	0.994718	1.00405	1.00136	0.999386	1.00436	0.994624		1.00042	0.00108596		0.996646	0.99816	0.991015	1.00257	1.00816	0.995336	1.00068	1.00546	0.999624	1.00239	1.00146	1.00184		1.00028	0.00132306		1.00033	1.00159	0.997204	1.00228	1.0001	1.00016		1.00028	0.000712462
0.875633	0.993723	0.999038	1.00226	0.994765	0.994909	0.999193	0.998323	0.996739	1.00284	0.997538	1.0025	1.00365	1.00032	1.0041	0.999416		0.999316	0.000858521		0.996905	0.999767	0.996018	1.00262	1.00762	0.995042	0.996831	1.00099	1.00044	1.00025	1.00161	1.00272		1.00007	0.00101583		0.997893	0.997246	0.993304	1.00076	0.997427	0.999619		0.997709	0.00104443
0.883667	0.993024	0.999667	1.0003	0.993409	1.00412	1.00389	1.00372	0.99936	1.00291	0.996782	1.00233	1.00423	1.00072	1.00378	0.996989		1.00043	0.000965444		0.99464	0.996614	0.994873	0.999218	1.00349	0.99881	0.999435	0.991059	0.997924	1.00424	1.00208	1.00205		0.998703	0.00114011		0.999608	1.00138	0.996231	1.00497	0.999756	0.999091		1.00017	0.00117873
0.8917	0.991075	0.99818	0.996852	0.997057	1.00288	1.00536	1.00393	0.997664	1.00815	0.998006	1.0019	0.997674	1.00183	1.00523	0.99946		1.00035	0.00113012		0.997647	0.999	0.994698	0.999128	1.00779	0.999139	0.998476	0.994738	1.00016	0.997136	1.00214	1.00296		0.999418	0.0010459		1.00177	1.00138	0.999221	1.00465	0.995617	0.999774		1.0004	0.00123229
0.899733	0.993525	0.998656	0.999435	0.994645	1.00283	1.00317	1.00497	0.995595	1.00129	0.993155	1.00061	1.00024	1.00216	1.00048	1.00154		0.999808	0.000839093		1.00056	0.999982	0.996624	1.00129	1.00277	0.997046	0.996604	0.999504	0.997203	1.00179	1.00161	1.00022		0.9996	0.000635475		1.00084	0.999752	0.997165	1.00228	0.996102	1.00133		0.999577	0.000998018
0.907767	0.996722	1.0019	1.00213	0.994681	0.999917	1.00296	0.999455	0.992758	0.999629	0.996415	1.00293	1.0013	0.999185	1.003	0.995623		0.999344	0.000832672		0.997299	0.996338	0.99581	0.999807	1.00572	1.00066	0.999713	0.998486	1.00277	1.00428	1.00317	1.00398		1.00067	0.000954545		1.00131	1.00035	1.00103	1.00485	0.995545	0.998236		1.00022	0.0012795
0.9158	0.995547	0.999269	0.999648	0.994032	1.00099	1.00337	1.00327	0.994612	1.00156	0.99811	1.00185	0.999546	0.999152	1.00077	0.998602		0.999346	0.000740893		0.995541	0.994022	0.997734	0.998012	0.99874	0.997247	0.997225	0.997531	1.00282	1.00605	1.00287	1.00251		0.999192	0.00102588		0.997559	0.999586	0.999602	1.00076	0.994427	0.999199		0.998522	0.000920999
0.923833	0.992428	0.991784	1.00118	0.997333	1.00049	1.00619	1.00613	0.992671	0.999551	0.997378	1.00054	0.999025	0.998503	0.998615	0.996853		0.998618	0.00110031		0.998628	0.996128	0.999287	1.00025	1.00722	1.00077	0.999972	0.993841	0.999735	1.00399	1.00289	1.00296		1.00047	0.00102422		1.00021	1.00144	0.996788	1.00285	0.998055	0.999025		0.999729	0.000910199
0.931867	0.995637	0.996328	0.997894	0.994121	1.00359	1.00649	1.00364	0.997847	0.99896	0.997042	1.00156	0.995326	0.999613	1.00227	0.996471		0.99918	0.000929728		0.990058	0.996358	0.993704	0.995427	1.00342	0.999729	0.998734	1.00395	1.00463	1.00746	1.00026	0.999962		0.999474	0.00144453		0.999485	1.0035	0.998576	1.00187	0.996494	0.999713		0.999939	0.00100643
0.9399	0.992876	0.996069	0.998198	0.995986	0.997653	0.99579	1.00086	0.99579	1.00019	0.994182	0.999444	0.998197	1.00316	1.00115	0.99972		0.998204	0.000683115		0.995232	0.997298	0.997162	1.00173	1.00642	1.00083	0.998743	0.993876	1.0005	1.00754	1.00218	1.00151		1.00025	0.00118518		0.998865	0.997777	0.998257	0.99668	0.999043	0.999305		0.998321	0.000399138
0.947933	0.991674	0.999707	1.00071	0.990796	1.00414	1.00829	1.00431	0.999935	0.999856	0.995195	1.00156	1.0002	1.00021	1.00432	0.999894		1.00024	0.00116197		0.998412	0.996237	0.996751	1.00047	1.0016	0.999485	1.00069	1.00099	1.00091	1.00107	1.00122	1.00105		0.999906	0.000523611		1.00395	1.00217	1.00211	1.00281	1.00133	0.998811		1.00186	0.000707757
0.955967	0.994292	1.00043	1.00409	0.994345	1.00439	1.00254	1.00293	1.00011	1.00005	0.99858	1.00056	0.994332	1.00038	0.998784	0.998327		0.999568	0.000856433		0.997693	0.996079	0.99477	0.998838	0.99904	0.999384	1.00428	1.00231	1.00564	1.00567	1.00244	1.00094		1.00059	0.00103371		1.00284	1.00042	0.999522	1.00176	0.995747	0.997834		0.999687	0.00106076
0.964	0.995198	0.998782	1.00005	0.991736	1.0008	1.0017	1.0039	0.997753	1.0011	0.995289	1.00254	0.994817	1.0006	1.00297	1.00109		0.9994	0.000873521		0.996224	0.999846	1.00124	1.00587	1.00538	0.999971	0.999188	0.999545	1.00201	0.998851	1.002	0.999633		1.00081	0.000786336		1.00008	1.00048	1.00092	0.998919	0.997754	1.00091		0.999846	0.00051621
0.972033	0.992571	0.997597	0.999674	0.993717	1.00277	1.00507	1.00608	0.996474	1.00232	0.994934	1.00214	0.996842	1.00052	0.999809	1.00141		0.999664	0.000995342		0.968357	0.979266	0.975433	0.976297	0.979605	0.977363	0.978782	0.998003	1.00323	0.997344	1.00298	1.00252		0.986598	0.00375043		1.0004	1.00313	1.00028	1.00136	0.997345	1.0005		1.0005	0.000767772
0.980067	0.995755	0.998747	1.00247	0.994677	1.0041	1.00077	1.00398	1.00081	1.00262	0.9975	1.00384	1.00106	1.00076	1.00312	0.997452		1.00054	0.000778082		0.998689	0.99554	0.996849	1.00036	1.00878	1.00005	1.03097	1.00043	0.998856	1.00836	1.0045	1.00396		1.00395	0.0027365		1.00026	0.999561	0.998633	1.00386	1.00004	1.00256		1.00082	0.000807202
0.9881	0.99448	0.999317	0.998118	0.99266	1.00169	1.00687	1.00388	0.995003	0.998358	0.99395	1.00048	0.997221	0.99965	1.00249	1.00275		0.999396	0.000979994		0.997254	0.999162	0.99832	1.00932	1.00343	1.00144	1.00104	0.99853	0.997048	1.00124	0.999824	1.00113		1.00065	0.000959867		1.0013	1.00311	1.00234	1.00341	0.998784	1.00093		1.00164	0.000696457
0.996133	0.994299	0.99988	0.996702	0.99452	0.998815	0.997955	1.00213	0.993637	0.996791	0.997557	1.00016	0.995149	1.00245	1.00126	1.00256		0.998285	0.000792987		0.998314	0.995329	1.00231	1.00629	1.00043	0.997245	0.999109	0.998073	0.995691	1.0027	1.00062	0.999484		0.999634	0.000899407		0.997615	1.00014	0.99656	0.997156	0.99773	0.999857		0.998177	0.000601649
1.00417	0.993747	0.995973	1.0002	0.993925	1.00027	0.997329	0.997649	0.997046	1.00309	0.997647	1.00323	0.987857	0.999945	0.996881	1.0002		0.997688	0.00101166		1.01029	0.996297	0.998803	1.00311	1.00826	0.997112	1.00367	0.999385	1.00138	1.0047	1.00231	1.00313		1.00237	0.00120854		0.997564	0.996651	0.997571	0.998541	0.995846	0.996932		0.997184	0.000377441
1.0122	0.989715	0.995039	0.997478	0.994081	1.00408	1.00649	1.0036	0.998597	1.00231	0.995175	1.00249	0.990912	0.997136	0.996872	1.00395		0.998714	0.00129544		0.997721	0.998071	0.993487	0.996543	1.00183	0.995306	0.994232	0.993175	0.996514	0.995635	1.00201	0.999558		0.997007	0.000855028		1.00164	1.00159	0.996938	1.0016	0.997392	0.998578		0.999623	0.000915207
1.02023	0.988728	0.991897	1.00063	0.994836	1.00059	1.00318	1.00446	0.996073	0.999657	0.999398	1.00513	0.998153	0.999297	0.999167	0.997404		0.998478	0.00113956		0.996848	0.994882	0.99912	0.994267	1.00623	0.997003	0.998269	1.00177	0.993725	0.998195	1.00119	1.00159		0.998591	0.00105339		0.99879	0.998897	0.997046	1.00063	0.999153	1.00149		0.999333	0.000634033
1.02827	0.995907	0.998844	0.994874	0.994545	0.999174	1.00512	1.00438	0.997566	0.999297	0.999864	1.00212	0.998727	0.998268	1.00035	1.00036		0.999167	0.000785838		1.00027	0.996061	0.995306	0.999992	1.0034	0.998754	1.00117	0.999079	0.995208	1.00582	1.0007	0.998265		0.999501	0.000914016		1.00101	1.00099	0.999017	1.00188	0.998302	0.99709		0.999714	0.000760401
1.0363	0.994152	0.997305	1.00183	0.995052	1.00131	1.00376	1.00494	0.996988	0.99843	0.999403	0.99714	0.994342	0.995943	0.99912	0.995605		0.998259	0.000863404		0.999893	0.994038	1.00037	1.0002	1.0009	0.996629	0.999394	1.00545	1.0109	1.00263	1.00454	1.00104		1.00133	0.00124304		1.00277	1.00083	1.00231	1.00308	0.996551	0.997836		1.00056	0.00112389
1.04433	0.990101	1.00211	0.998922	0.994221	1.00139	0.999378	1.00222	0.998703	0.998718	1.00046	1.00365	0.999104	0.998354	0.997258	1.00007		0.998811	0.000858771		1.00069	0.99355	0.994474	0.999631	1.00727	0.997546	0.998401	0.997416	0.993055	0.997336	1.00468	1.00008		0.998677	0.0012217		1.00272	0.997456	1.00027	1.00385	0.9964	0.998249		0.999826	0.00122012
1.05237	1.00109	0.997358	0.996751	0.99421	0.998821	1.00044	1.0007	0.999662	1.00184	0.997714	1.00283	0.992026	0.994952	0.996796	0.995295		0.998049	0.000799798		0.997181	0.996655	0.996494	0.997128	1.00488	0.997815	1.00182	0.996813	0.992732	0.997942	1.00376	1.00006		0.998607	0.000991225		0.999456	0.997432	0.99798	1.00005	0.995972	0.99839		0.998214	0.000595932
1.0604	0.997772	1.00046	0.999641	0.994907	1.00632	1.00676	1.00325	0.996554	0.999992	0.995842	1.00118	0.996749	0.996473	0.996528	1.0005		0.999671	0.000921931		0.99932	0.995535	0.99825	1.00359	1.01047	0.999831	1.00151	1.0009	0.993259	0.999396	1.00357	0.999859		1.00046	0.00124647		1.00601	0.999896	1.00491	1.00391	0.995812	1.00005		1.00176	0.00157442
1.06843	0.990529	0.998253	0.996868	0.99454	1.00213	1.00276	1.00231	0.994756	0.996338	0.99756	1.00138	0.995387	0.996553	0.99793	0.99937		0.997805	0.00087941		1.00018	0.996693	0.997023	0.998204	1.00831	0.998454	1.00164	1.00157	0.995992	1.00291	1.00318	1.00072		1.0004	0.00100301		1.00476	0.999587	0.997825	1.001	0.999018	0.999805		1.00033	0.000981721
1.07647	0.99739	0.997908	0.998701	0.993338	1	1.00014	0.998458	0.994723	0.994905	0.994484	1.00103	0.997502	0.998022	0.995703	1.00231		0.997873	0.000635334		1.00088	0.994734	0.99651	1.00169	1.0122	0.999506	1.00341	1.00237	0.995844	0.997881	1.00393	1.00006		1.00075	0.00134915		0.999277	0.998895	1.0001	1.00015	0.994495	1.00098		0.998983	0.000945809
1.0845	0.997126	0.995563	0.996892	0.993305	1.00096	1.00312	1.00184	0.993917	0.997198	0.996448	1.00113	0.996985	1.00036	0.999391	1.00145		0.99848	0.000767756		0.999894	0.994675	0.994508	0.999977	1.00612	1.00129	0.997633	1.00181	0.9972	0.996771	1.00496	1.00025		0.999591	0.00105679		1.00174	0.999282	1.00067	0.999335	0.998329	1.00269		1.00034	0.000677203
1.09253	0.996486	0.995938	0.996196	0.990932	0.997625	1.0015	0.997356	0.997911	0.998909	0.998855	1.00476	1.00019	0.999378	1.00004	0.999658		0.998322	0.000790042		1.00212	0.998234	0.999598	0.999071	1.00766	0.998435	1.0007	0.998704	0.999336	0.995753	1.00148	0.998428		0.99996	0.000848452		0.999773	1.00131	1.00133	0.999329	0.998126	1.00042		1.00005	0.000505588
1.10057	0.996444	0.996252	0.999516	0.990856	0.995043	1.0008	0.996155	0.995795	0.997671	0.996853	1.00112	1.00788	0.999557	1.00055	1.00576		0.998758	0.00109472		0.998732	0.99549	0.995321	0.999642	1.00696	0.997512	1.00095	1.00097	0.99935	0.996696	1.00126	0.998633		0.999293	0.000909626		0.998833	1.00075	0.998006	0.998338	0.998813	1.00224		0.999497	0.000672681
1.1086	0.998628	0.997066	0.997973	0.991761	0.997824	0.996711	1.00024	0.997111	0.996985	0.995089	0.999433	0.997839	0.998282	0.994365	0.998234		0.997361	0.000525731		1.00331	0.998337	1.00066	1.00367	1.00725	1.00275	1.00525	1.00205	1.00081	0.992539	1.00166	0.998856		1.00143	0.00108525		0.999032	0.999428	0.999614	1.00002	0.996646	1.0024		0.999523	0.000753901
1.11663	0.998088	0.998689	0.997735	0.99166	0.997905	0.996502	0.999454	0.993389	0.997463	0.995809	1.00386	0.999867	0.999789	0.999584	0.999455		0.998093	0.000730771		1.00668	1.001	1.00308	1.00064	1.00813	0.999156	1.00246	1.00158	0.999954	1.00048	1.00112	0.997317		1.0018	0.000873425		0.999128	0.995809	1.00103	0.999047	0.997788	0.999057		0.998644	0.000708416
1.12467	0.995304	0.999862	0.99993	0.989417	0.996435	1.00034	0.999324	0.994932	0.994693	0.999101	1.00267	1.00207	1.00029	0.999051	1.00198		0.998285	0.00091952		1.0001	0.99727	0.994669	0.996438	1.00673	1.00128	1.00229	0.996892	0.995896	0.996369	1.0019	0.998701		0.999044	0.00101037		0.997877	0.998936	0.999873	0.998797	0.995562	1.00525		0.999382	0.00131703
1.1327	0.998275	1.0051	0.998231	0.991418	1.00244	1.00651	0.998826	0.992429	0.996187	0.995429	0.99913	1.00841	0.999675	0.999613	1.00582		1	0.00126679		1.00352	0.998299	0.996936	1.00045	1.00512	0.998396	0.999092	1.00381	0.997639	1.00117	1.00417	0.998777		1.00061	0.000826698		1.00199	1.0014	0.99915	1.00404	0.999329	1.00442		1.00172	0.000916043
1.14073	0.990166	0.998661	0.998768	0.993799	1.00327	1.00382	1.00162	1.00064	1.00064	0.996913	1.00704	1.00302	1.00084	0.994284	1.0041		0.999908	0.00115468		1.004	1.0013	1.00092	1.00101	1.00543	1.00244	1.00289	0.99445	0.989119	0.991047	1.00443	0.999843		0.99974	0.00153636		1.0007	0.999791	0.999594	0.999724	0.998145	1.00187		0.999971	0.000507251
1.14877	0.995255	0.999909	0.994229	0.993617	1.00052	1.00416	1.00147	0.997884	0.998652	0.995954	1.00765	1.00149	0.998842	0.997622	1.00269		0.999464	0.000969683		1.00378	0.99676	0.996043	1.00081	1.00805	1.00202	1.00413	0.999732	1.0002	0.99595	1.00447	0.999219		1.00093	0.00107925		1.00178	0.999812	0.99903	1.00245	0.999008	1.00093		1.0005	0.000591345
1.1568	0.999932	1.00082	1.00176	0.993484	1.00188	1.0036	0.996381	0.993083	0.997782	0.994911	1.00484	1.0013	0.996772	0.998012	0.998528		0.999076	0.000877118		0.999951	0.997986	0.997778	0.99777	1.00697	1.00239	1.00002	0.999945	0.997096	1.0032	1.00118	0.999725		1.00033	0.000812162		0.999561	0.999109	0.99821	0.999549	0.997933	1.00099		0.999225	0.000448891
1.16483	0.994965	1.00365	0.997225	0.992446	1.00564	1.00818	1.00366	0.998396	1.00195	1.00044	1.00768	1.00323	0.997467	0.999128	1.00134		1.00086	0.00118181		1.00635	0.993931	0.998268	1.00073	0.998625	1.00133	1.00101	0.999308	0.997492	0.996314	1.00001	0.999602		0.999414	0.000877978		1.00004	1.00133	1.00301	1.00336	0.99583	0.998681		1.00038	0.00116053
1.17287	0.996506	1.00189	0.99776	0.993647	1.00574	1.00774	1.00473	0.994974	0.997787	0.99525	1.00412	1.00202	0.997035	0.996742	1.00314		1.00012	0.00111428		1.00301	0.997706	0.998456	1.0001	1.00521	1.00804	1.003	1.00696	0.993487	1.00005	1.00346	1.00011		1.00163	0.00119457		0.999339	1.00103	1.0003	1.0004	0.997352	1.00087		0.999883	0.000561061
1.1809	0.998063	1.00474	0.998339	0.992367	1.0004	1.0001	1.00205	0.996361	1.00036	0.998292	1.00685	0.998258	0.998202	0.998561	1.00204		0.999644	0.000890962		1.00552	0.997444	0.998941	1.00051	1.00643	1.00001	1.0037	0.998298	0.99449	0.99913	1.0012	1.00099		1.00056	0.000977362		0.998449	0.99964	1.00215	1.0013	0.998445	0.999513		0.999916	0.000617913
1.18893	0.994391	1.00573	0.994769	0.992372	1.00113	1.00844	1.00441	0.99527	0.99526	0.993985	1.00724	1.00238	0.997154	1.00004	1.0047		1.00008	0.00134334		1.00273	0.998918	0.992613	0.999454	1.00602	1.00368	1.00226	0.998991	0.99731	1.00043	0.998699	0.998987		1.00001	0.000990316		0.999044	1.00094	1.00235	1.00024	0.996158	1.00199		1.00012	0.000931389
1.19697	0.994323	1.00069	0.997444	0.994055	1.00273	1.0057	1.00191	0.996909	0.998247	0.999351	1.00604	1.00192	0.999784	0.996334	1.00533		0.999959	0.0010164		1.00479	0.997416	0.995074	0.998909	1.00522	1.00232	0.998545	0.998551	0.989566	0.995616	1.00212	0.998869		0.998917	0.00126668		1.00283	1.00164	1.00048	1.00103	0.997245	1.0008		1.00067	0.000764567
1.205	0.997594	1.00485	0.998074	0.990061	1.00668	1.00592	1.00345	0.997274	0.997766	0.999264	1.005	0.999714	0.998767	0.996188	1.00648		1.00039	0.00123611		1.00003	0.999985	0.993158	0.99515	1.00032	0.998084	0.996802	0.999638	0.990133	0.997948	1.00282	0.997744		0.997651	0.00100322		0.999693	1.00026	0.9998	1.0032	0.99857	1.00158		1.00052	0.000668387
1.21303	0.997584	1.00582	0.999215	0.9912	1.00287	1.00298	1.00236	0.996229	0.998952	1.00238	1.00751	1.00084	0.996978	0.994494	1.00185		0.999789	0.00111091		1.00191	1.00193	1.0014	1.00263	1.00467	1.00071	1.00176	1.00289	0.998512	0.994426	1.00169	0.998805		1.00094	0.000762908		0.997168	1.00118	1.00013	1.00226	0.996834	1.00077		0.999726	0.000907978
1.22107	0.9988	1.00596	0.999902	0.991547	1.00078	0.997856	0.995189	0.998232	0.997676	0.996152	1.00411	1.00587	0.998789	0.997646	1.00781		0.999876	0.00113103		1.00386	1.00024	0.999535	1.00094	1.01282	0.99938	0.999165	0.998139	0.995234	1.00273	1.00159	0.997984		1.00097	0.00126298		0.995486	0.999438	0.99852	1.0006	0.998447	0.99943		0.998653	0.000709244
1.2291	0.997039	0.99913	1.00735	0.9924	0.996928	0.997436	0.993754	0.994874	0.997337	0.995944	0.999999	1.00351	0.999412	0.997453	1.00818		0.998851	0.00115496		1.00656	1.00161	1.00061	0.997215	1.00649	0.999896	1.00441	0.993709	0.989846	0.997413	1.00364	1.00042		1.00015	0.00145063		0.996047	0.997686	0.998184	1.00031	1.0002	1.00058		0.998834	0.000743689
1.23713	0.995734	1.0007	0.999227	0.990395	1.00525	1.00602	1.00105	0.994127	0.995359	0.994556	1.00512	1.00159	0.999062	0.995661	1.00303		0.999354	0.00117116		1.00177	0.998668	0.99923	1.00156	1.00804	1	0.999676	1.0006	0.998065	1.00694	1.00131	0.997261		1.00109	0.000952489		0.99969	1.00109	0.99883	0.997903	0.999209	1.00168		0.999733	0.000579227
1.24517	0.99633	1.00203	1.00065	0.992052	1.00672	1.00731	1.00215	0.996525	0.998007	0.993965	1.00499	1.00001	0.995772	1.00139	1.00875		1.00071	0.00123101		1.00763	1.00126	1.00026	0.996701	1.00652	1.00366	1.00271	0.998164	0.994154	1.0035	1.00077	0.998596		1.00116	0.00113543		0.999032	0.999396	0.999367	1.00225	0.999735	1.00098		1.00013	0.000506574
1.2532	0.994447	1.00043	0.999925	0.992328	1.00549	1.00764	1.00441	0.9971	0.99695	0.999813	1.00959	1.00311	1.00007	0.997431	1.0052		1.00081	0.00128218		1.005	0.999469	0.997355	0.999654	1.00078	1.00099	1.00074	1.00135	0.988499	0.994425	1.00148	0.999583		0.999109	0.00120769		1.00005	0.999372	0.998679	0.999995	1.00384	1.0017		1.0006	0.000765237
1.26123	1.00165	1.00208	1.00242	0.989757	1.00447	1.0028	1.00091	0.995915	0.998072	0.998641	1.00478	1.00008	0.996579	0.995659	1.00234		0.9997	0.00104344		1.0073	0.999666	0.998473	1.00263	1.00902	1.00117	0.997611	0.9961	0.992928	1.00915	1.00028	0.999358		1.00114	0.00146913		0.998287	1.00226	1.00005	1.0031	1.00098	1.00045		1.00085	0.000693402
1.26927	0.998378	1.00272	0.998604	0.990452	1.00894	1.00175	1.00289	0.998004	0.999703	0.999188	1.00577	0.998555	0.993396	0.999345	0.99946		0.999729	0.00115759		1.00089	0.99981	0.992012	0.995176	1.00452	0.995468	1.00018	1.00032	0.992227	1.00797	1.00163	0.997867		0.999006	0.00137151		0.999257	1.00133	1.00022	1.00019	1.00052	0.998082		0.999933	0.000459003
1.2773	0.996006	0.998492	0.998645	0.994625	1.00663	1.01025	1.00349	0.993943	0.998888	0.994527	1.00281	0.998395	0.998039	0.998198	1.00663		1.0002	0.00122084		1.00506	1.00119	0.996419	1.00276	1.00492	1.00175	1.00332	0.993478	0.999362	1.00337	1.0018	0.99802		1.00096	0.00101632		0.997336	1.0025	0.996645	1.00381	0.997701	0.997844		0.999307	0.00124078
1.28533	0.997147	1.001	0.99771	1.00227	1.00165	1.00267	1.00106	0.994982	0.995921	0.997777	1.00174	1.00393	0.993608	1.00151	1.00419		0.999824	0.000859726		1.00638	0.998295	0.997073	1.00116	1.00302	1.00161	1.00446	0.997722	0.995871	0.99445	0.999887	0.998275		0.99985	0.00103314		0.995631	1.00141	1.00015	1.00058	1.00158	0.998901		0.999708	0.000906179
1.29337	1.00608	1.00938	1.00739	0.993286	1.00942	1.0023	1.0041	0.997923	0.997553	0.999597	1.00548	0.996987	0.998779	0.998445	1.00221		1.00182	0.00128754		0.995718	0.997251	0.994975	0.997693	1.00055	0.996558	0.996851	1.00625	0.996774	1.00124	1.00212	1.00096		0.998912	0.00095632		0.999145	0.999977	1.00117	1.00157	0.998257	0.998975		0.99985	0.000533486
1.3014	1.00445	1.00203	1.00569	0.991602	1.00674	0.999456	1.00096	0.997382	0.999795	1.00058	1.0052	1.00009	0.997023	0.998709	1.00333		1.00069	0.00103708		1.00559	0.998861	0.997889	0.997618	1.00302	0.998172	1.00188	0.995146	0.99209	0.999334	1.00165	0.998194		0.99912	0.00103708		0.997852	0.998495	0.997377	1.00229	0.998039	0.999227		0.998879	0.000727672
1.30943	1.00173	1.00064	1.00252	0.992591	1.00997	1.00526	1.00729	0.994918	0.999289	1.00065	1.00153	1.0032	0.996613	1.00166	1.00382		1.00127	0.00118034		1.00114	0.999494	0.997174	0.993603	0.998986	0.997152	0.999214	1.00256	0.994942	1.00652	1.0126	0.997522		1.00008	0.00150683		1.00289	0.99966	1.00016	1.00153	1.00327	0.998741		1.00104	0.000744481
1.31747	1.0038	1.00186	0.999135	0.994382	1.00758	1.00791	1.00362	0.997116	0.997752	0.994266	1.00315	0.998031	0.99507	0.999303	1.00319		1.00066	0.00107584		1.00568	1.00108	0.997106	1.00026	0.9996	0.997075	1.00067	0.995661	0.99045	1.0001	0.998226	0.997413		0.99861	0.0010581		0.999276	0.999887	1.00384	1.00284	1.00107	0.997467		1.00073	0.000960512
1.3255	0.99965	1.00308	0.998828	0.991124	1.00805	1.00239	1.00375	0.99824	0.998924	0.995281	1.00412	0.991442	0.987097	0.995276	0.995689		0.998375	0.00144857		0.998232	0.996779	0.998224	0.997642	1.00254	0.997055	0.99763	1.0015	0.995937	0.999839	0.998872	0.996801		0.998421	0.000572686		0.997438	0.998915	0.998146	1.00086	0.995466	0.993232		0.997344	0.00109475
1.33353	1.00368	1.00131	1.00017	0.992017	1.00201	0.997435	0.99888	0.99767	0.999134	0.997443	1.00366	0.997236	0.996045	0.999913	0.999657		0.999119	0.000775666		1.00747	0.999844	0.998385	1.00141	1.01044	1.00311	1.00099	0.995869	0.994552	0.994994	0.999004	0.997677		1.00031	0.00139553		0.994719	0.995539	0.996176	0.99857	1.00325	1.00316		0.998569	0.00155681
1.34157	0.998189	1.00081	0.999242	0.990983	1.00916	0.998918	1.00385	0.997862	0.999169	0.998146	1.00271	0.996997	0.998077	1.00267	1.00691		1.00023	0.00113239		1.00056	1.00009	0.996696	0.998989	1.0052	0.999711	0.994055	0.997019	0.995173	1.00143	0.998939	0.998965		0.998903	0.000856036		0.999613	0.998572	0.997752	0.997464	1.00293	0.99989		0.999369	0.000813705
1.3496	1.00313	1.00447	1.00024	0.993738	1.00272	1.00176	1.00299	1.00178	1.00246	1.00348	1.00603	1.00483	1.00148	1.0036	1.00461		1.00212	0.000788284		1.00356	1.00051	0.998224	0.998873	1.00083	0.997325	0.999934	0.998409	1.00718	1.00505	1.00144	0.999586		1.00091	0.000857929		0.996664	1.00056	0.99718	0.998426	1.00211	1.00006		0.999167	0.000859028
1.35763	1.00084	1.00327	1.00013	0.991763	1.0083	1.00359	1.00368	1.00032	1.001	0.999286	1.00399	0.998094	1.00047	1.00226	1.00502		1.00138	0.000978957		1.00596	0.998816	0.995491	1.00388	1.01177	1.00424	1.00378	1.00178	1.00372	1.00554	0.997085	0.995678		1.00231	0.00138664		0.997683	0.999142	1.00021	1.00242	1.00203	1.00188		1.00056	0.000769423
1.36567	1.00339	1.01855	1.00175	0.990652	1.00511	1.00218	1.00008	0.995409	0.997899	0.99472	0.998514	1.00269	0.9942	1.00213	1.0021		1.00084	0.00161513		1.00983	0.999162	0.994296	1.00229	1.0059	0.999382	0.998904	1.00191	0.992958	1.00117	0.996856	0.99801		1.00006	0.00134803		0.997471	0.997748	0.997241	0.997118	1.00237	0.998897		0.998474	0.000821549
1.3737	1.01663	1.00103	1.00072	0.989749	1.00467	0.997735	1.00155	0.997417	0.997732	0.998022	1.00367	0.999264	0.996213	1.00052	1.0033		1.00055	0.00148607		1.00155	1.00231	0.998216	0.999698	1.00042	0.999877	1.00056	1.00441	0.990753	1.00191	0.99897	0.999105		0.999814	0.000959512		0.994427	0.999697	0.999748	0.998185	1.00149	0.997907		0.998576	0.000982302
1.38173	1.00614	1.00588	0.998987	0.989805	1.00522	0.998187	1.00243	0.996596	0.997122	0.99826	1.00198	0.999621	0.998233	1.0012	1.00126		1.00004	0.00108637		1.0036	0.998273	0.994306	1.00132	1.00528	0.995013	0.999537	1.00482	1.00653	1.00321	0.998403	0.997296		1.00063	0.00118174		0.995816	0.999191	0.999609	1.00097	1.00194	0.998334		0.99931	0.000874242
1.38977	1.0012	1.00429	0.998898	0.992825	1.00738	1.00055	1.00395	0.996414	0.998094	0.994918	0.999251	1.00108	0.998178	1.00365	1.00612		1.00066	0.00100687		1.00412	0.998739	0.997764	0.999653	1.00078	0.995088	0.996189	1.00375	1.00142	1.00181	1.00123	0.997532		0.999841	0.000824127		0.997394	0.997429	0.99791	1.00019	0.999703	1.00026		0.998815	0.00056368
1.3978	1.00223	1.00347	1.0013	0.991722	0.998929	0.998856	1.002	1.00176	1.00223	0.997372	1.0082	1.00244	0.995328	0.999477	1.00154		1.0005	0.000975375		1.00154	1.00004	0.999492	1.00097	1.00171	0.994375	1.00245	1.00621	0.996285	1.0002	0.99751	0.99633		0.999758	0.000935277		0.994428	0.99841	0.993213	0.997536	1.00024	0.998127		0.996993	0.00108053
1.40583	1.00512	1.001	1.00109	0.991469	1.00045	0.995275	0.999944	1.00395	1.00286	0.998908	1.0063	1.00318	0.996521	1.00314	1.00476		1.00087	0.00105716		1.00463	1.00047	0.998796	1.00164	0.999074	0.99483	1.00138	1.00122	0.999102	1.00048	1.00002	0.996304		0.999828	0.000734032		0.993659	0.998705	0.995138	1.00093	0.997268	0.999671		0.997561	0.00112936
1.41387	1.00095	1.00113	1.00031	0.992374	1.00454	1.00049	1.00155	0.998836	0.997578	0.999371	1.0042	1.00174	0.997348	1.00265	1.00036		1.00013	0.000785668		1.00298	1.00068	0.994727	1.00042	0.999924	0.997958	0.998578	1.00234	0.997331	0.996787	0.99925	0.998766		0.999145	0.000672966		0.997679	0.999817	0.998811	0.999264	1.00072	1.00097		0.999543	0.000502482
1.4219	1.00235	1.00115	0.998611	0.992019	0.999265	0.996333	1.00079	1.00016	0.999539	0.99834	1.00689	0.998237	0.999075	1.00166	1.00317		0.999814	0.000859478		1.00427	0.997753	0.996067	1.0044	1.00165	0.995769	1.00014	1.00585	1.00375	0.999103	0.999113	0.998205		1.0005	0.000987426		0.996923	0.997946	0.996977	0.997204	0.999812	1.00089		0.998291	0.000681772
1.42993	0.994644	0.997267	1.00035	0.990512	1.0073	1.00457	1.00647	1.00295	1.0009	1.0006	1.00125	1.0017	0.997493	0.997596	1.00052		1.0001	0.00113937		1.00744	1.00161	1.00241	1.00217	1.00582	0.997933	1.00019	0.995989	0.997	0.998427	0.998455	0.997848		1.00044	0.00102614		0.997465	0.999257	0.998817	1.00221	0.999128	0.996712		0.998932	0.000774486
1.43797	1.00358	0.998274	0.999224	0.990302	1.00242	0.998035	1.0035	0.999295	0.999207	0.997163	1.00518	1.00226	0.997719	1.00054	1.00199		0.999966	0.000923208		0.9975	0.996143	0.992836	0.998496	1.0055	0.996248	0.996237	1.00456	1.00169	0.998586	0.996658	0.998454		0.998575	0.0010588		0.999279	1.00002	1.00205	1.00164	0.999108	0.999808		1.00032	0.000505296
1.446	1.00164	0.999875	1.00068	0.990062	0.998885	0.99265	0.998988	1.00264	1.00096	0.99881	1.00024	1.0032	0.996016	1.00069	1.00059		0.999005	0.000931929		1.00052	1.00289	0.98996	0.999419	1.00076	0.994776	0.997941	1.00528	0.998986	1.00184	0.997605	0.998775		0.999063	0.00113783		0.997974	1.00036	0.996429	0.999763	1.00085	0.999121		0.999082	0.000670417
1.45403	1.0045	1.0019	0.99893	0.99181	1.00481	1.00081	1.00343	1.00055	0.99923	0.998585	1.00153	0.996437	0.994662	0.995765	0.994813		0.999143	0.00100015		1.00247	1.00146	0.996503	1.00609	1.00992	1.00066	1.00049	1.00574	0.997478	0.997621	0.996356	0.998221		1.00109	0.00124287		1.00135	1.0005	0.998503	1.0033	0.998201	0.997652		0.999917	0.000892102
1.46207	0.998736	1.00324	0.998127	0.9911	1.00143	1.00318	1.0011	1.00138	1.00218	0.999269	1.00248	1.00307	0.99472	1.00135	0.996371		0.999762	0.000916955		0.996311	1.00023	0.993415	0.999748	0.999175	0.99634	0.997367	1.00112	1.00118	0.997342	0.999299	0.998386		0.998326	0.000658689		0.99798	0.997871	0.998607	0.999188	0.999186	1.00214		0.999163	0.000639438
1.4701	1.00183	1.00095	1.00154	0.990493	1.00026	1.0011	1.00279	1.00537	0.998605	0.999261	1.00077	1.00277	0.994232	1.00075	0.999774		0.999946	0.000933804		0.99874	0.999369	0.99522	0.998572	0.997465	0.994726	0.996252	1.00225	0.999958	0.997729	0.997535	0.998547		0.998031	0.000597068		0.996263	0.999301	0.996512	0.996131	1.00081	1.00112		0.998357	0.000954391
1.47813	0.999793	0.998994	0.999442	0.991602	0.99834	0.999852	0.998896	1.00042	1.00296	0.998435	1.00113	1.00138	0.997656	1.00104	1.0011		0.999372	0.000669075		1.0013	0.999788	0.994501	1.00099	1.00532	0.99634	0.997329	1.00456	0.998775	0.994589	0.997832	0.999365		0.999224	0.00099709		0.996055	0.998791	0.998744	1.00127	0.998346	1.00187		0.999181	0.00086497
1.48617	1.00251	1.00062	0.998662	0.991348	1.00061	1.00065	1.00098	1.00022	1.00051	1.00414	0.997551	0.997852	0.995326	1.00343	1.00473		0.999531	0.000852976		1.0007	0.99991	0.993416	1.0005	1.00023	0.995163	0.999939	1.00958	0.998809	0.995194	0.998805	0.998119		0.999198	0.00117148		0.998741	0.997597	0.999194	0.999479	0.999042	0.999626		0.998946	0.000298757
1.4942	1.00106	0.999606	0.998183	0.986569	0.998663	1.00009	1.00666	0.998981	0.999951	1.00154	1.0024	0.999955	0.997907	1.00077	1.00513		0.999594	0.00113594		0.998642	0.9991	0.992673	1.00244	0.99979	0.996453	0.997779	1.00166	0.993739	0.999688	0.99676	0.997588		0.998026	0.00083227		0.997361	0.999805	0.995976	0.999243	0.999216	1.00122		0.998803	0.000758565
1.50223	1.00411	1.00363	0.99455	0.986421	1.00037	0.993809	1.00587	0.999636	0.998878	1.00067	1.00214	0.99453	0.994617	0.998829	0.999228		0.998306	0.00128196		0.997933	1.0023	0.99308	1.00242	1.00181	0.999755	1.00047	1.00144	1.00316	1.00581	0.997546	0.996923		1.00022	0.000983252		0.999895	1.00183	1.00348	0.997863	0.99674	0.996891		0.999449	0.00113295
1.51027	1.00154	1.00387	1.00382	0.991161	1.00071	1.00407	1.00492	0.998734	0.999455	1.00058	0.99657	0.999761	0.99596	1.00248	0.997516		0.999902	0.000970241		0.995868	1.00152	0.992648	1.00016	1.00033	0.998445	0.998928	1.00307	1.00311	0.996058	0.998835	0.999953		0.999076	0.000882632		1.00023	1.00047	0.999228	0.997134	0.999339	1.00326		0.999942	0.000818424
1.5183	1.00007	1.00096	1.00094	0.988762	0.992332	0.997694	0.999052	1.0016	1.00184	1.00244	0.999526	0.998051	0.996072	0.999105	0.998638		0.998174	0.000913623		1.00038	0.99829	0.991509	1.00057	1.00032	0.998172	0.997291	1.00306	1.00207	0.9985	0.999256	0.997587		0.998917	0.000845873		0.999344	0.99787	0.996331	0.99466	0.996636	0.997219		0.99701	0.000641717
1.52633	0.9992	1.00327	0.998824	0.989801	0.998528	0.999533	0.997647	0.999317	0.999281	1.00174	1.0027	1.00217	0.997334	0.999137	1.00309		0.999187	0.000843127		0.998838	0.999224	0.992142	1.00062	1.00151	0.998033	0.999457	1.00486	0.996656	0.995141	0.998818	0.998325		0.998636	0.000916371		0.996429	0.997269	0.996433	0.994894	0.997404	1.00025		0.997113	0.000725951
1.53437	1.00085	0.996084	0.998167	0.990401	1.00246	1.00055	1.0048	1.00224	0.998288	1.00167	0.999694	0.99868	0.996178	0.99695	1.00478		0.999206	0.000956723		1.00264	0.997487	0.993806	1.00196	1.00241	1.00299	0.99864	0.997998	0.999134	0.997581	0.99722	0.996609		0.999039	0.000829458		1.00267	1.00253	0.997655	0.995359	0.99686	0.998382		0.998911	0.00123802
1.5424	0.997125	0.999405	0.998024	0.989493	0.996284	0.999947	1.00113	1.00342	1.00021	1.00335	1.00231	0.998008	0.997333	0.999133	1.00202		0.998787	0.000853826		0.997677	0.998068	0.994058	1.0004	0.998946	0.997293	0.998563	1.00254	0.995424	0.997512	0.997237	0.997062		0.997899	0.000627451		0.999459	1.00025	1.00009	0.99698	0.99689	0.99851		0.998695	0.000610048
1.55043	0.997434	0.998523	0.998709	0.99004	0.999141	0.996251	1.0055	0.99761	1.00002	1.00117	1.00004	0.999657	0.997955	1.00206	1.00672		0.999175	0.000995217		0.997731	0.99648	0.992072	1.00476	0.994997	0.99444	1.00313	1.00355	0.99663	1.00212	0.998523	0.997209		0.998471	0.00116521		0.996651	0.998912	0.997698	0.993681	0.99768	1.00014		0.99746	0.000900554
1.55847	0.999508	1.00249	0.99831	0.989123	0.997528	0.996441	1.00325	0.99488	0.998479	1.00098	0.997832	0.999955	0.998771	1.00162	1.0026		0.998583	0.000913002		0.996185	0.999455	0.993227	0.997927	1.00091	0.999943	1.00099	1.00068	1.00216	0.995018	0.999521	0.997309		0.99861	0.000783572		1.00049	0.997768	0.997301	0.996108	0.997164	1.00208		0.998484	0.00093492
1.5665	0.995339	1.00013	1.00066	0.992895	0.99839	0.994759	1.00391	1.00105	0.999684	1.00387	0.998505	0.998063	0.997402	0.999318	1.00254		0.998707	0.000749292		0.998819	0.998653	0.997329	1.00393	0.997955	1.00212	1.0031	1.00565	0.996412	0.997531	0.999579	0.998025		0.999924	0.000865799		1.00019	1.00143	0.998595	0.996669	0.997623	1.00045		0.999158	0.00074693
1.57453	1.00717	1.00073	1.00062	0.993543	0.998749	0.99831	1.00138	0.999127	1.00114	1.00286	0.999504	0.999919	1.00037	1.00224	1.00741		1.00055	0.000879599		1.00335	1.00147	0.99616	1.00403	0.995606	0.999648	1.00224	1.01247	1.00144	1.0028	1.00175	0.997419		1.00153	0.00127871		0.998233	0.99983	0.999761	0.993591	0.999027	0.999835		0.998379	0.000991662
1.58257	1.00065	0.998645	1.00114	0.991706	1.00156	1.0045	1.00469	1.00289	0.999343	1.00498	0.999496	0.99868	1.00127	1.00017	1.00214		1.00032	0.000806521		0.99782	0.997093	0.993321	1.00039	0.996732	0.999114	0.998026	0.996557	0.995393	1.0007	0.992918	0.998049		0.997177	0.000702784		0.998903	1.00317	0.998632	1.00097	0.998914	1.00206		1.00044	0.000782214
1.5906	0.999495	0.996321	1.00079	0.992982	1.00056	1.00181	1.00235	1.00119	0.998366	0.99831	0.999637	0.999569	1.00313	0.999428	1.00179		0.999693	0.000666412		1.00084	1.00021	0.996308	1.00113	1.00744	1.00008	1.00178	0.994537	0.989389	0.995215	0.998317	1.00081		0.998838	0.00131082		1.00053	1.00025	0.997177	0.998997	0.995912	0.999708		0.998761	0.000750581
1.59863	0.995629	1.00009	1.00033	0.992131	0.9988	1.00185	0.999353	1.00286	1.00226	1.00301	0.999661	0.995728	0.999697	1.00025	1.00415		0.999384	0.000798466		0.999527	0.999704	0.995369	1.00694	1.00025	1.00096	1.00232	1.00491	0.997039	1.00093	0.997074	0.99904		1.00034	0.000946169		0.997955	0.999031	0.99904	0.996807	0.998879	0.998361		0.998345	0.000353954
[truncated: 674 more rows]

## Sheet: Fig 4 I-J
Fig.4I Delta ratio values of pH-Lemon-GPI on min 6
TPC2-A1-N
control	TPC2wt	TPC2L265P
0.01023	0.277242	0.0761734
0.018946	0.165221	0.00447059
-0.0367215	0.382872	0.0781044
0.039826	0.092363	-0.0075799
-0.01196	0.130776	0.0645433
-0.0239023	0.152375	0.0232406
-0.0169248	0.137351	-0.0138633
-0.0043425	0.124032	0.160881
[truncated: 26 more rows]

## Sheet: Fig 4 K
Fig. 4K Average ratio signals over time of pH- Lemon-GPI in HeLa cells
[truncated: 888 more rows]

[truncated: 1 more sheets: Fig 4 N]
