# Supplementary material for: Agonist-mediated switching of ion selectivity in TPC2 differentially promotes lysosomal function
Source: eLife. 2020 Mar 16;9:e54712. doi: 10.7554/eLife.54712 (PMC7108868; doi:10.7554/eLife.54712)
Supplement: Figure 5—source data 1. [file elife-54712-fig5-data1.xlsx]

## Sheet: Fig 5 C-E
Fig. 5C Statistical analysis
Lamp1 intensity (PM) FOLD on DMSO
TPC2-A1-N 15µM 2´ wt	TPC2-A1-N 15µM 5´ wt	TPC2-A1-N 15µM 10´ wt	TPC2-A1-N 15µM 30´ Wt	TPC2-A1-N 15µM 30´ KO		TPC2-A1-N 30µM 2´ wt	TPC2-A1-N 30µM 5´ wt	TPC2-A1-N 30µM 10´ wt	TPC2-A1-N 30µM 30´ wt	TPC2-A1-N 30µM 30´ Ko	TPC2-A1-N 30µM 120´ wt	TPC2-A1-N 30µM 120´ KO
0.858602	0.944045	0.998756	0.922001	1.31308		0.933029	1.26328	0.447292	0.205221	0.401166	1.8259	0.771035
3.64407	0.745031	0.94608	1.30705	2.70461		0.660641	1.62167	1.17698	0.0281131	0.648632	1.05454	0.986446
1.80805	0.677872	0.62356	2.61946	1.26737		3.14544	0.472171	1.88292	0.425921	3.68904	3.69075	0.409729
0.938724	0.673928	1.00562	3.19971	0.797354				0.641375	0.12233	7.02256	2.20601	2.39094
1.15999	0.863231	1.45383	0.801158	1.0277				6.2438	0.256437	0.215987	4.40445	0.935442
0.59897	1.11014	1.40439	0.600729					1.82229	1.85575	1.75827	2.65057	0.157831
0.897245	0.485483	0.797165	0.664347					1.33092			4.85811	0.677763
			0.624475								3.37799	1.08753
											2.94498	0.709489
											4.64354	5.00641
											8.78364	3.33195
											7.27104	7.59168
											1.83557	0.188051
											1.77774	4.11094
											5.43104	5.99107
Fig. 5D Statistical analysis
Lamp1 intensity (PM) FOLD on DMSO
TPC2-A1-P 15µM 90´ wt	TPC2-A1-P 15µM 90´ KO	TPC2-A1-P 30µM 30´ wt	TPC2-A1-P 30µM 30´ KO	TPC2-A1-P 30µM 90´ wt	TPC2-A1-P 30µM 90´ wt	TPC2-A1-P 30µM 120´ wt	TPC2-A1-P 30µM 120´ wt
23.1954	1.25656	0.0566104	1.76368	20.76	3.01115	33.9278	1.23069
24.8921	6.18654	2.4217	0.396586	10.3034	1.26644	47.8962	0.389393
16.7005	1.05464	0.0425952	0.481728	13.3094	2.64889	38.6604	0.350162
20.8412	2.65342	2.87309	0.706435	17.1144	1.44649	28.4968	1.13354
15.7089	11.6755	2.70277	0.656705	18.0363	2.65342	2.54189	0.529718
28.7881	1.37336	1.98669	0.597798	15.7428		2.14865	1.03668
6.02879		2.4956	0.550144	20.3371		1.59441	0.365202
3.53965		1.22076	0.575952	14.3096		3.62971	1.32054
3.71276		0.922712	0.402059	18.1943		3.70329	0.301312
		1.23926	0.426153			3.21797	0.550702
		0.759853	0.734726			3.13876	2.01448
		5.76384				6.2331	1.44113
		1.28469				13.195	1.18429
		1.54581				25.699	0.934999
		1.56757				16.7733	1.3739
		0.0771212				16.7398	0.846649
						17.0521	1.2624
						21.0477	2.02681
							0.908959
							2.11128
Fig. 5E Statistical analysis
Lamp1 intensity (PM) FOLD on DMSO
DMSO 120´ wt	DMSO 120´ KO	Iono 4µM 10´ wt	Iono 4µM 10´ KO
0.638586	1.07678	2.70339	8.96002
0.646068	0.551924	30.6074	11.0937
0.379144	0.675664	19.6818	7.48539
0.850947	2.2285	21.9786	25.0158
1.12144	1.27201	23.5884	1.21071
0.694697	0.715145	12.7124	9.71717
0.510284	0.90641	18.1581	1.73448
1.15307	0.681053	37.5087	3.43767
1.10986	1.33959	3.80492	16.7013
2.89591	0.552921	4.55335	12.6447
0.633731	1.54051	4.61505	9.93199
1.14337	0.746376	3.85093	5.819
1.6502	0.662288	6.62159	3.11594
0.896239	1.04211	1.98016	6.20599
0.632093	0.750487	3.74938	5.64473
1.48964	1.07817	3.39113	5.5555
1.13259	1.20981	5.1797	4.30733
1.82591	1.18337	5.291	6.66337
0.126961	0.831331		3.65142
0.469264	0.955557		4.90971
0.210773	0.521435		4.24403
2.75879	0.312677		3.28897
0.337113	1.06622		6.47956
1.37844	1.00671		47.2726
0.483568	0.699669		47.7929
0.831313	2.39329

## Sheet: FIg 5 F-H
Fig. 5 H) TPC2 agonists differentially affect lysosomal exocytosis.
Initial cell size (t = 1 s)	Mean	SE
WT	2.35333e-11	1.00341e-12	n(WT) = 9
TPC2 -/-	2.47941e-11	1.32819e-12	n(TPC-/-) = 9
Nrm.cell size (t = 400 s)	Mean	SE
WT	1.05266	0.0108777	n(WT) = 9
TPC2 -/-	1.01932	0.0111462	n(TPC-/-) = 9
Nrm.cell size (t = 540 s)	Mean	SE
WT	1.05289	0.0109183	n(WT) = 9
TPC2 -/-	0.996216	0.0219112	n(TPC-/-) = 9
Fig. 5 F-G) TPC2 agonists differentially affect lysosomal exocytosis.
	n(WT) = 9		n(TPC-/-) = 9
	WT	WT	TPC2 -/-	TPC2 -/-
Time [s]	Mean	SE	Mean	SE
0	1	4.2141e-07	1	3.43554e-07
2	0.998878	0.0011222	0.997133	0.00116487
6	0.998372	0.00197317	0.997461	0.00210047
8	0.99953	0.00221386	0.996558	0.00290116
10	0.996737	0.00172567	0.997799	0.00305003
12	0.996125	0.00240148	0.995142	0.00357936
14	0.996787	0.00234867	0.997088	0.0038043
16	0.998736	0.00241297	0.993327	0.0043793
18	0.99807	0.00246065	0.993528	0.00486986
20	0.996701	0.00246156	0.994167	0.00491187
23	0.994715	0.00319249	0.996395	0.00467253
25	0.994162	0.00334105	0.99597	0.00430999
27	0.995361	0.00338573	0.99843	0.00350454
29	0.996006	0.00244317	1.00139	0.00424265
31	0.996737	0.00248817	1.0022	0.00492796
34	0.996718	0.00268096	1.00024	0.00386648
36	0.99616	0.0043368	0.999638	0.00391743
38	0.997636	0.00407	0.999805	0.00458391
40	0.997732	0.00487485	1.00202	0.0036685
42	0.99756	0.00443231	1.01128	0.00962807
45	0.997636	0.00407	1.00239	0.00854613
47	0.998848	0.00417962	0.998778	0.0104989
49	0.999702	0.00447935	0.997839	0.0112002
51	0.998848	0.00417962	1.0004	0.0115439
53	0.99949	0.00378019	1.00162	0.0117289
56	0.999068	0.0049145	1.00341	0.0131819
58	0.997333	0.00472059	1.00366	0.0145325
60	0.998752	0.0050061	1.00172	0.0140655
62	0.998803	0.00525936	1.00098	0.0134656
64	1.00017	0.00427644	1.00159	0.0129829
67	0.998803	0.00525936	0.996281	0.00992578
69	0.998188	0.00502025	0.995397	0.0100359
71	1.00119	0.0045645	0.99471	0.00944529
73	1.00019	0.00545676	0.992891	0.00931744
75	1.00069	0.00507726	0.991468	0.00988196
78	1.00069	0.00507726	0.988558	0.0103383
80	1.00067	0.00555221	0.989664	0.00992152
82	1.00067	0.00555221	0.989104	0.0100849
84	1.00052	0.00533208	0.989664	0.00992152
86	1.00335	0.0050126	0.990782	0.00953899
88	1.00268	0.00511137	0.992172	0.00872136
91	1.00263	0.00527967	0.990166	0.00945366
93	1.00495	0.00587662	0.990443	0.00911114
95	1.00502	0.005934	0.992078	0.00970029
97	1.00428	0.00564371	0.995338	0.00909574
99	1.00694	0.00609791	0.99508	0.0096921
102	1.00675	0.00554354	0.996507	0.00890183
104	1.0085	0.00668262	0.998267	0.00969103
106	1.00626	0.00673972	0.996543	0.0091362
108	1.00753	0.00710197	1.00084	0.00885129
110	1.00674	0.00637174	0.999058	0.00958521
113	1.00776	0.00589888	1.0012	0.00899503
115	1.00762	0.00670638	1.00102	0.00995377
117	1.00762	0.00670638	1.00391	0.0089904
119	1.007	0.00695832	1.00391	0.0089904
121	1.00836	0.00690791	1.00391	0.0089904
124	1.00761	0.00693637	1.00391	0.0089904
126	1.00958	0.0065679	1.00388	0.00903143
128	1.00947	0.00672244	1.00523	0.00790599
130	1.00873	0.00653093	1.00589	0.00799925
132	1.00806	0.00659969	1.00682	0.00763056
135	1.00873	0.00653093	1.00723	0.00842404
137	1.00873	0.00653093	1.00623	0.0081142
139	1.00873	0.00653093	1.0069	0.00808415
141	1.00947	0.00672244	1.00681	0.00768277
143	1.01	0.0068652	1.00675	0.0073751
146	1.01035	0.00735531	1.00756	0.00672192
148	1.01178	0.00726469	1.00756	0.00672192
150	1.01178	0.00726469	1.01016	0.00697739
152	1.01035	0.00735531	1.01013	0.00681446
154	1.01035	0.00735531	1.01075	0.00697664
156	1.01035	0.00735531	1.01205	0.00711181
159	1.01096	0.00759516	1.01051	0.00767668
161	1.01028	0.00788069	1.0094	0.00708912
163	1.01045	0.00815848	1.00948	0.0071554
165	1.00895	0.0075604	1.01195	0.0069243
167	1.00955	0.00780763	1.01198	0.00699498
170	1.01114	0.00845334	1.01193	0.00692254
172	1.00883	0.00780226	1.01196	0.00705555
174	1.00894	0.00699506	1.01175	0.00662649
176	1.00856	0.00698219	1.01108	0.00664898
178	1.00766	0.00653652	1.01297	0.00651165
181	1.00856	0.00698219	1.01324	0.00610851
183	1.00856	0.00698219	1.01452	0.00608043
185	1.00775	0.00756077	1.01251	0.00621104
187	1.00788	0.00726379	1.01508	0.00644729
189	1.00788	0.00726379	1.01673	0.0062864
192	1.00856	0.00698219	1.01737	0.00624973
194	1.00694	0.00650394	1.01672	0.00599024
196	1.00724	0.00679093	1.01672	0.00599024
198	1.00932	0.00704482	1.01644	0.00652388
200	1.00991	0.00718968	1.0194	0.00637578
203	1.00911	0.00777039	1.02078	0.00637055
205	1.01073	0.00664798	1.01919	0.00598377
207	1.01051	0.00738185	1.02034	0.00693384
209	1.01217	0.00672292	1.02128	0.00686869
211	1.01317	0.00677646	1.02358	0.00664862
214	1.01373	0.00722785	1.02423	0.00667185
216	1.01282	0.00674178	1.02293	0.00648339
218	1.01368	0.00671277	1.02489	0.00654788
220	1.01352	0.00652857	1.02631	0.00679613
222	1.01281	0.00742298	1.02631	0.00679591
225	1.01522	0.00703334	1.02698	0.00712547
227	1.01485	0.00731846	1.0283	0.00702157
229	1.01658	0.00715541	1.02895	0.00718185
231	1.01658	0.00715541	1.02962	0.00727896
233	1.01719	0.00739667	1.03097	0.00776526
235	1.0165	0.00720904	1.032	0.00792273
238	1.0166	0.00678636	1.03125	0.00783804
240	1.01721	0.00704008	1.03125	0.00772389
242	1.01875	0.00635582	1.03335	0.00843353
244	1.0171	0.00755618	1.03266	0.00791113
246	1.01875	0.00635582	1.03243	0.0086875
249	1.01792	0.00693777	1.03243	0.0086875
251	1.0178	0.00760334	1.03319	0.00892678
253	1.01926	0.00685115	1.03386	0.00902301
255	1.01926	0.00685115	1.03378	0.00899192
257	1.02077	0.00788881	1.03378	0.00899192
260	1.02015	0.0076407	1.03666	0.00915084
262	1.02086	0.00743634	1.03597	0.00902334
264	1.01926	0.00685115	1.03589	0.00921336
266	1.02019	0.00736555	1.03589	0.00921336
268	1.01917	0.00733726	1.03734	0.00936658
271	1.0181	0.00783656	1.03801	0.00926621
273	1.01748	0.00755945	1.03734	0.00936658
275	1.01827	0.00781273	1.03611	0.00936637
277	1.01881	0.00794207	1.03705	0.00926842
279	1.01969	0.00780677	1.03611	0.00936637
282	1.01968	0.00794109	1.03698	0.0093585
284	1.01897	0.00784536	1.03939	0.00967842
286	1.01805	0.00734546	1.0387	0.00952508
288	1.02015	0.00776746	1.0387	0.00952508
290	1.02015	0.00811159	1.0387	0.00952508
293	1.02092	0.00843109	1.03939	0.00967842
295	1.01889	0.00760123	1.03767	0.00953011
297	1.0196	0.00770093	1.03913	0.00990783
299	1.02179	0.00771455	1.04058	0.0100585
301	1.02026	0.00848893	1.04126	0.00993827
303	1.02246	0.00763429	1.04224	0.0102799
306	1.02175	0.0079199	1.04199	0.0105603
308	1.02109	0.00799002	1.0419	0.0102522
310	1.02026	0.00848893	1.0419	0.0102522
312	1.02026	0.00848893	1.04122	0.010374
314	1.02109	0.00799002	1.04122	0.0100977
317	1.02116	0.00805816	1.04055	0.00998766
319	1.02044	0.00811187	1.04051	0.0101588
321	1.02236	0.00870953	1.04059	0.0104062
323	1.02063	0.00904038	1.04369	0.0103808
325	1.02063	0.009674	1.04425	0.00986882
328	1.02063	0.009674	1.04269	0.0109625
330	1.02195	0.00961031	1.04314	0.00962049
332	1.02063	0.009674	1.04293	0.0105485
334	1.02063	0.009674	1.04235	0.0110977
336	1.02131	0.00926539	1.04135	0.010626
339	1.02131	0.00926539	1.04529	0.00995683
341	1.02124	0.00972145	1.04383	0.00983854
343	1.02189	0.0101013	1.04286	0.00954706
345	1.02128	0.0100605	1.04266	0.0105775
347	1.02125	0.0102714	1.04511	0.010983
350	1.02323	0.0101346	1.04585	0.0113344
352	1.02186	0.0103115	1.0456	0.0117283
354	1.02053	0.0103693	1.04506	0.0103738
356	1.02251	0.0107142	1.04529	0.00995683
358	1.02254	0.00999182	1.04457	0.00968143
361	1.02251	0.0107142	1.04434	0.0100459
363	1.02251	0.0107142	1.04457	0.00968143
365	1.02053	0.0103693	1.04607	0.00987427
367	1.02053	0.0103693	1.0475	0.0106083
369	1.02138	0.0100349	1.04678	0.0102206
372	1.02272	0.0101353	1.0475	0.0106083
374	1.02187	0.01048	1.04541	0.009854
376	1.02331	0.0104723	1.04678	0.0102206
378	1.02247	0.010812	1.04606	0.0106846
380	1.02315	0.0105026	1.04463	0.00993025
382	1.024	0.0101454	1.046	0.0103072
385	1.02683	0.0109486	1.0467	0.0102962
387	1.02466	0.0104678	1.04809	0.0106462
389	1.02331	0.0104723	1.04816	0.0109405
391	1.02551	0.0101683	1.04959	0.0112024
393	1.02186	0.0109811	1.04885	0.0108172
396	1.02199	0.010552	1.05035	0.0110564
398	1.02422	0.0103515	1.04891	0.0113271
400	1.02391	0.0110485	1.04891	0.0113271
402	1.02658	0.0121484	1.05055	0.0113201
404	1.02521	0.0113895	1.04957	0.0113631
407	1.02591	0.0110726	1.04963	0.0116617
409	1.02331	0.0109749	1.04882	0.011093
411	1.0216	0.011327	1.05026	0.0112337
413	1.02246	0.0113053	1.05026	0.0112337
415	1.02186	0.0113454	1.05026	0.0112337
418	1.02113	0.0106666	1.05118	0.0105678
420	1.02198	0.0104091	1.05251	0.0118407
422	1.01911	0.0108928	1.05101	0.0116526
424	1.02114	0.0113669	1.05333	0.0108865
426	1.01997	0.0106609	1.05262	0.0108995
429	1.02134	0.0106842	1.05264	0.0109969
431	1.02129	0.0106136	1.05197	0.0109829
433	1.02072	0.0110344	1.05193	0.0110042
435	1.01868	0.0109476	1.05187	0.0109122
437	1.01868	0.0109476	1.05189	0.0107924
440	1.01932	0.0111462	1.05266	0.0108777
442	1.02072	0.0110344	1.05189	0.0107924
444	1.02006	0.0108473	1.05342	0.0113522
446	1.02003	0.0115149	1.05267	0.0111161
448	1.02223	0.0107837	1.05332	0.0112855
450	1.01893	0.0115684	1.05333	0.0108865
453	1.01856	0.012084	1.05332	0.0112855
455	1.01927	0.0120632	1.05332	0.0112855
457	1.01593	0.0124104	1.0543	0.0112015
459	1.01527	0.0119745	1.05332	0.0112855
461	1.01667	0.0118846	1.05261	0.0110256
464	1.01604	0.0127904	1.05261	0.0110256
466	1.01454	0.0125293	1.05261	0.0110256
468	1.01333	0.0130278	1.05409	0.011355
470	1.0156	0.0133453	1.05338	0.011103
472	1.01621	0.0132866	1.05409	0.011355
475	1.01814	0.0125827	1.05338	0.011103
477	1.01731	0.0127975	1.05338	0.011103
479	1.01594	0.0125955	1.05288	0.0111549
481	1.01665	0.0126765	1.05261	0.0110256
483	1.01395	0.0128015	1.05338	0.011103
486	1.01598	0.0129238	1.05431	0.010475
488	1.01401	0.0133671	1.05509	0.011019
490	1.01548	0.0133198	1.05529	0.0103729
492	1.01477	0.0132349	1.05529	0.0103729
494	1.01411	0.0134942	1.05509	0.011019
497	1.01577	0.0140391	1.05431	0.010475
499	1.01541	0.013297	1.05535	0.0107225
501	1.01481	0.0135818	1.05438	0.0108221
503	1.01506	0.0139605	1.05438	0.0108221
505	1.01577	0.0140391	1.05431	0.010475
508	1.01441	0.0142392	1.05438	0.0108221
510	1.01452	0.0146078	1.05361	0.0102611
512	1.01386	0.0142312	1.05438	0.0108221
514	1.01286	0.0140665	1.05294	0.0110245
516	1.01293	0.0144543	1.05151	0.01049
518	1.01452	0.0146078	1.05469	0.0107294
521	1.01139	0.0159072	1.05438	0.0108221
523	1.01132	0.0155284	1.05438	0.0108221
525	1.0133	0.0151928	1.05292	0.0108753
527	1.01139	0.0159072	1.05369	0.0106696
529	1.01139	0.0159072	1.05535	0.0107225
532	1.00938	0.0163154	1.05377	0.0109239
534	1.01024	0.0163259	1.05353	0.0114152
536	1.01082	0.0162107	1.05345	0.0114318
538	1.01082	0.0162107	1.05516	0.0109482
540	1.00663	0.0169753	1.05438	0.0108221
